# Supplementary material for: In Silico and In Vitro Analyses Validate Human MicroRNAs Targeting the SARS-CoV-2 3′-UTR
Source: Int J Mol Sci. 2021 Jun 5;22(11):6094. doi: 10.3390/ijms22116094 (PMC8201247; doi:10.3390/ijms22116094)
Supplement: Supplementary file 1 [file ijms-22-06094-s001.zip]

Archive with 4 entries (4 files):
- Legends of Supplementary Tables.pdf
- Table S1.xlsx
- Table S2.xlsx
- Table S3.pdf
