# Supplementary material for: In Silico and In Vitro Analyses Validate Human MicroRNAs Targeting the SARS-CoV-2 3′-UTR
Source: Int J Mol Sci. 2021 Jun 5;22(11):6094. doi: 10.3390/ijms22116094 (PMC8201247; doi:10.3390/ijms22116094)
Supplement: Supplementary file 1 [file ijms-22-06094-s001.zip › Table S1.xlsx]

## Sheet: miRDB
	ID	Accession	Sequence (5' - 3')	Length	Target Score	Unions	Seed location
1	hsa-miR-3941	MIMAT0018357	uuacacacaacugaggaucaua	22	84	2	14, 133
2	hsa-miR-466	MIMAT0015002	auacacauacacgcaacacacau	23	81	2	15, 132
3	hsa-miR-4775	MIMAT0019931	uuaauuuuuuguuucggucacu	22	78	1	138
4	hsa-miR-4717-3p	MIMAT0019830	acacauggguggcuguggccu	21	68	1	163
5	hsa-miR-5088-5p	MIMAT0021080	cagggcucagggauuggauggagg	24	60	1	124
6	hsa-miR-603	MIMAT0003271	cacacacugcaauuacuuuugc	22	58	1	13
7	hsa-miR-6749-3p	MIMAT0027399	cuccuccccugccuggcccag	21	55	1	27
8	hsa-miR-1236-3p	MIMAT0005591	ccucuuccccuugucucuccag	22	54	1	120
9	hsa-miR-4279	MIMAT0016909	cucuccucccggcuuc	16	53	1	186
10	hsa-miR-4672	MIMAT0019754	uuacacagcuggacagaggca	21	51	22	15, 133

## Sheet: IntaRNA 3UTR miRDB
id1	start1	end1	seedStart1	seedEnd1	ED1	id2	start2	end2	seedStart2	seedEnd2	ED2	E	E_hybrid	E_norm	subseqDP	hybridDP	seq1	seq2
NC_045512.2	3	21	14	19	2.58	hsa-miR-3941	1	18	3	8	0.26	-11.32	-14.16	-13279	AUCUUUAAUCAGUGUGUAA&UUACACACAACUGAGGAU	(((((((....((((((((&))))))))...)))))))	CAAUCUUUAAUCAGUGUGUAACAUUAGGGAGGACUUGAAAGAGCCACCACAUUUUCACCGAGGCCACGCGGAGUACGAUCGAGUGUACAGUGAACAAUGCUAGGGAGAGCUGCCUAUAUGGAAGAGCCCUAAUGUGUAAAAUUAAUUUUAGUAGUGCUAUCCCCAUGUGAUUUUAAUAGCUUCUUAGGAGAAUGACAAAAAAAAAAAAAAAAAAAAAAAAAAAAAAAAA	UUACACACAACUGAGGAUCAUA
NC_045512.2	162	169	162	167	2.91	hsa-miR-4717-3p	2	9	4	9	0.97	-10.21	-14.09	-120426	CCCAUGUG&CACAUGGG	((((((((&))))))))	CAAUCUUUAAUCAGUGUGUAACAUUAGGGAGGACUUGAAAGAGCCACCACAUUUUCACCGAGGCCACGCGGAGUACGAUCGAGUGUACAGUGAACAAUGCUAGGGAGAGCUGCCUAUAUGGAAGAGCCCUAAUGUGUAAAAUUAAUUUUAGUAGUGCUAUCCCCAUGUGAUUUUAAUAGCUUCUUAGGAGAAUGACAAAAAAAAAAAAAAAAAAAAAAAAAAAAAAAAA	ACACAUGGGUGGCUGUGGCCU
NC_045512.2	27	33	27	32	3.88	hsa-miR-4279	4	10	5	10	0.27	-9.93	-14.08	-121004	GGGAGGA&UCCUCCC	(((((((&)))))))	CAAUCUUUAAUCAGUGUGUAACAUUAGGGAGGACUUGAAAGAGCCACCACAUUUUCACCGAGGCCACGCGGAGUACGAUCGAGUGUACAGUGAACAAUGCUAGGGAGAGCUGCCUAUAUGGAAGAGCCCUAAUGUGUAAAAUUAAUUUUAGUAGUGCUAUCCCCAUGUGAUUUUAAUAGCUUCUUAGGAGAAUGACAAAAAAAAAAAAAAAAAAAAAAAAAAAAAAAAA	CUCUCCUCCCGGCUUC
NC_045512.2	124	130	124	129	2.42	hsa-miR-5088-5p	2	8	3	8	1.22	-9.59	-13.23	-111359	GAGCCCU&AGGGCUC	(((((((&)))))))	CAAUCUUUAAUCAGUGUGUAACAUUAGGGAGGACUUGAAAGAGCCACCACAUUUUCACCGAGGCCACGCGGAGUACGAUCGAGUGUACAGUGAACAAUGCUAGGGAGAGCUGCCUAUAUGGAAGAGCCCUAAUGUGUAAAAUUAAUUUUAGUAGUGCUAUCCCCAUGUGAUUUUAAUAGCUUCUUAGGAGAAUGACAAAAAAAAAAAAAAAAAAAAAAAAAAAAAAAAA	CAGGGCUCAGGGAUUGGAUGGAGG
NC_045512.2	27	33	27	32	3.88	hsa-miR-6749-3p	2	8	3	8	0.63	-9.08	-13.59	-107098	GGGAGGA&UCCUCCC	(((((((&)))))))	CAAUCUUUAAUCAGUGUGUAACAUUAGGGAGGACUUGAAAGAGCCACCACAUUUUCACCGAGGCCACGCGGAGUACGAUCGAGUGUACAGUGAACAAUGCUAGGGAGAGCUGCCUAUAUGGAAGAGCCCUAAUGUGUAAAAUUAAUUUUAGUAGUGCUAUCCCCAUGUGAUUUUAAUAGCUUCUUAGGAGAAUGACAAAAAAAAAAAAAAAAAAAAAAAAAAAAAAAAA	CUCCUCCCCUGCCUGGCCCAG
NC_045512.2	12	19	14	19	1.71	hsa-miR-603	2	9	2	7	1.87	-7.78	-11.36	-0.912635	CAGUGUGU&ACACACUG	((((((((&))))))))	CAAUCUUUAAUCAGUGUGUAACAUUAGGGAGGACUUGAAAGAGCCACCACAUUUUCACCGAGGCCACGCGGAGUACGAUCGAGUGUACAGUGAACAAUGCUAGGGAGAGCUGCCUAUAUGGAAGAGCCCUAAUGUGUAAAAUUAAUUUUAGUAGUGCUAUCCCCAUGUGAUUUUAAUAGCUUCUUAGGAGAAUGACAAAAAAAAAAAAAAAAAAAAAAAAAAAAAAAAA	CACACACUGCAAUUACUUUUGC
NC_045512.2	60	73	60	65	5.99	hsa-miR-4279	3	16	11	16	0.29	-7.65	-13.93	-0.932209	GAGGCCACGCGGAG&CUCCUCCCGGCUUC	((((((....((((&))))....))))))	CAAUCUUUAAUCAGUGUGUAACAUUAGGGAGGACUUGAAAGAGCCACCACAUUUUCACCGAGGCCACGCGGAGUACGAUCGAGUGUACAGUGAACAAUGCUAGGGAGAGCUGCCUAUAUGGAAGAGCCCUAAUGUGUAAAAUUAAUUUUAGUAGUGCUAUCCCCAUGUGAUUUUAAUAGCUUCUUAGGAGAAUGACAAAAAAAAAAAAAAAAAAAAAAAAAAAAAAAAA	CUCUCCUCCCGGCUUC
NC_045512.2	14	20	14	19	1.54	hsa-miR-466	8	14	9	14	0.02	-7.57	-9.13	-0.883395	GUGUGUA&UACACGC	(((((((&)))))))	CAAUCUUUAAUCAGUGUGUAACAUUAGGGAGGACUUGAAAGAGCCACCACAUUUUCACCGAGGCCACGCGGAGUACGAUCGAGUGUACAGUGAACAAUGCUAGGGAGAGCUGCCUAUAUGGAAGAGCCCUAAUGUGUAAAAUUAAUUUUAGUAGUGCUAUCCCCAUGUGAUUUUAAUAGCUUCUUAGGAGAAUGACAAAAAAAAAAAAAAAAAAAAAAAAAAAAAAAAA	AUACACAUACACGCAACACACAU
NC_045512.2	5	21	16	21	2.45	hsa-miR-4672	1	18	1	6	1.98	-7.36	-11.79	-0.868104	CUUUAAUCAGUGUGUAA&UUACACAGCUGGACAGAG	((((...((((((((((&))))))).)))...))))	CAAUCUUUAAUCAGUGUGUAACAUUAGGGAGGACUUGAAAGAGCCACCACAUUUUCACCGAGGCCACGCGGAGUACGAUCGAGUGUACAGUGAACAAUGCUAGGGAGAGCUGCCUAUAUGGAAGAGCCCUAAUGUGUAAAAUUAAUUUUAGUAGUGCUAUCCCCAUGUGAUUUUAAUAGCUUCUUAGGAGAAUGACAAAAAAAAAAAAAAAAAAAAAAAAAAAAAAAAA	UUACACAGCUGGACAGAGGCA
NC_045512.2	104	126	104	109	10.41	hsa-miR-1236-3p	2	20	15	20	0.08	-7.31	-17.8	-0.857502	GGAGAGCUGCCUAUAUGGAAGAG&CUCUUCCCCUUGUCUCUCC	((((((..........(((((((&)))))))......))))))	CAAUCUUUAAUCAGUGUGUAACAUUAGGGAGGACUUGAAAGAGCCACCACAUUUUCACCGAGGCCACGCGGAGUACGAUCGAGUGUACAGUGAACAAUGCUAGGGAGAGCUGCCUAUAUGGAAGAGCCCUAAUGUGUAAAAUUAAUUUUAGUAGUGCUAUCCCCAUGUGAUUUUAAUAGCUUCUUAGGAGAAUGACAAAAAAAAAAAAAAAAAAAAAAAAAAAAAAAAA	CCUCUUCCCCUUGUCUCUCCAG
NC_045512.2	111	139	134	139	6.24	hsa-miR-4672	1	21	1	6	1.98	-7.18	-15.4	-0.846873	UGCCUAUAUGGAAGAGCCCUAAUGUGUAA&UUACACAGCUGGACAGAGGCA	(((((...((....(((.....(((((((&))))))))))...)).)))))	CAAUCUUUAAUCAGUGUGUAACAUUAGGGAGGACUUGAAAGAGCCACCACAUUUUCACCGAGGCCACGCGGAGUACGAUCGAGUGUACAGUGAACAAUGCUAGGGAGAGCUGCCUAUAUGGAAGAGCCCUAAUGUGUAAAAUUAAUUUUAGUAGUGCUAUCCCCAUGUGAUUUUAAUAGCUUCUUAGGAGAAUGACAAAAAAAAAAAAAAAAAAAAAAAAAAAAAAAAA	UUACACAGCUGGACAGAGGCA
NC_045512.2	99	107	99	104	5.15	hsa-miR-6749-3p	9	17	12	17	0.98	-7.18	-13.31	-0.846873	GCUAGGGAG&CUGCCUGGC	((((((.((&)).))))))	CAAUCUUUAAUCAGUGUGUAACAUUAGGGAGGACUUGAAAGAGCCACCACAUUUUCACCGAGGCCACGCGGAGUACGAUCGAGUGUACAGUGAACAAUGCUAGGGAGAGCUGCCUAUAUGGAAGAGCCCUAAUGUGUAAAAUUAAUUUUAGUAGUGCUAUCCCCAUGUGAUUUUAAUAGCUUCUUAGGAGAAUGACAAAAAAAAAAAAAAAAAAAAAAAAAAAAAAAAA	CUCCUCCCCUGCCUGGCCCAG
NC_045512.2	57	64	59	64	3.61	hsa-miR-4775	11	18	11	16	0.11	-6.56	-10.28	-0.769523	ACCGAGGC&GUUUCGGU	((((((((&))))))))	CAAUCUUUAAUCAGUGUGUAACAUUAGGGAGGACUUGAAAGAGCCACCACAUUUUCACCGAGGCCACGCGGAGUACGAUCGAGUGUACAGUGAACAAUGCUAGGGAGAGCUGCCUAUAUGGAAGAGCCCUAAUGUGUAAAAUUAAUUUUAGUAGUGCUAUCCCCAUGUGAUUUUAAUAGCUUCUUAGGAGAAUGACAAAAAAAAAAAAAAAAAAAAAAAAAAAAAAAAA	UUAAUUUUUUGUUUCGGUCACU
NC_045512.2	126	138	133	138	2.51	hsa-miR-466	2	14	2	7	0.02	-6.47	-9	-0.755028	GCCCUAAUGUGUA&UACACAUACACGC	((....(((((((&)))))))....))	CAAUCUUUAAUCAGUGUGUAACAUUAGGGAGGACUUGAAAGAGCCACCACAUUUUCACCGAGGCCACGCGGAGUACGAUCGAGUGUACAGUGAACAAUGCUAGGGAGAGCUGCCUAUAUGGAAGAGCCCUAAUGUGUAAAAUUAAUUUUAGUAGUGCUAUCCCCAUGUGAUUUUAAUAGCUUCUUAGGAGAAUGACAAAAAAAAAAAAAAAAAAAAAAAAAAAAAAAAA	AUACACAUACACGCAACACACAU
NC_045512.2	193	208	203	208	0.76	hsa-miR-4775	5	20	5	10	0.12	-5.9	-6.78	-0.692101	UGACAAAAAAAAAAAA&UUUUUUGUUUCGGUCA	((((..(((.((((((&)))))).)))..))))	CAAUCUUUAAUCAGUGUGUAACAUUAGGGAGGACUUGAAAGAGCCACCACAUUUUCACCGAGGCCACGCGGAGUACGAUCGAGUGUACAGUGAACAAUGCUAGGGAGAGCUGCCUAUAUGGAAGAGCCCUAAUGUGUAAAAUUAAUUUUAGUAGUGCUAUCCCCAUGUGAUUUUAAUAGCUUCUUAGGAGAAUGACAAAAAAAAAAAAAAAAAAAAAAAAAAAAAAAAA	UUAAUUUUUUGUUUCGGUCACU
NC_045512.2	128	139	133	138	2.46	hsa-miR-3941	1	16	2	7	0.26	-5.8	-8.52	-0.680371	CCUAAUGUGUAA&UUACACACAACUGAGG	(((..(((((((&)))))))......)))	CAAUCUUUAAUCAGUGUGUAACAUUAGGGAGGACUUGAAAGAGCCACCACAUUUUCACCGAGGCCACGCGGAGUACGAUCGAGUGUACAGUGAACAAUGCUAGGGAGAGCUGCCUAUAUGGAAGAGCCCUAAUGUGUAAAAUUAAUUUUAGUAGUGCUAUCCCCAUGUGAUUUUAAUAGCUUCUUAGGAGAAUGACAAAAAAAAAAAAAAAAAAAAAAAAAAAAAAAAA	UUACACACAACUGAGGAUCAUA
NC_045512.2	186	191	186	191	2.54	hsa-miR-4279	2	7	2	7	0.28	-5.39	-8.21	-0.656812	AGGAGA&UCUCCU	((((((&))))))	CAAUCUUUAAUCAGUGUGUAACAUUAGGGAGGACUUGAAAGAGCCACCACAUUUUCACCGAGGCCACGCGGAGUACGAUCGAGUGUACAGUGAACAAUGCUAGGGAGAGCUGCCUAUAUGGAAGAGCCCUAAUGUGUAAAAUUAAUUUUAGUAGUGCUAUCCCCAUGUGAUUUUAAUAGCUUCUUAGGAGAAUGACAAAAAAAAAAAAAAAAAAAAAAAAAAAAAAAAA	CUCUCCUCCCGGCUUC
NC_045512.2	157	164	157	162	2.87	hsa-miR-5088-5p	11	21	16	21	1.22	-4.28	-8.37	-0.496994	CUAUCCCC&GGAUUGGAUGG	((((((((&))...))))))	CAAUCUUUAAUCAGUGUGUAACAUUAGGGAGGACUUGAAAGAGCCACCACAUUUUCACCGAGGCCACGCGGAGUACGAUCGAGUGUACAGUGAACAAUGCUAGGGAGAGCUGCCUAUAUGGAAGAGCCCUAAUGUGUAAAAUUAAUUUUAGUAGUGCUAUCCCCAUGUGAUUUUAAUAGCUUCUUAGGAGAAUGACAAAAAAAAAAAAAAAAAAAAAAAAAAAAAAAAA	CAGGGCUCAGGGAUUGGAUGGAGG
NC_045512.2	166	174	166	171	2.36	hsa-miR-3941	14	22	17	22	0.2	-3.9	-6.46	-0.457491	UGUGAUUUU&AGGAUCAUA	(((((((((&)))))))))	CAAUCUUUAAUCAGUGUGUAACAUUAGGGAGGACUUGAAAGAGCCACCACAUUUUCACCGAGGCCACGCGGAGUACGAUCGAGUGUACAGUGAACAAUGCUAGGGAGAGCUGCCUAUAUGGAAGAGCCCUAAUGUGUAAAAUUAAUUUUAGUAGUGCUAUCCCCAUGUGAUUUUAAUAGCUUCUUAGGAGAAUGACAAAAAAAAAAAAAAAAAAAAAAAAAAAAAAAAA	UUACACACAACUGAGGAUCAUA
NC_045512.2	179	184	179	184	1.04	hsa-miR-4672	15	20	15	20	1.9	-3.4	-6.34	-0.401026	GCUUCU&AGAGGC	((((((&))))))	CAAUCUUUAAUCAGUGUGUAACAUUAGGGAGGACUUGAAAGAGCCACCACAUUUUCACCGAGGCCACGCGGAGUACGAUCGAGUGUACAGUGAACAAUGCUAGGGAGAGCUGCCUAUAUGGAAGAGCCCUAAUGUGUAAAAUUAAUUUUAGUAGUGCUAUCCCCAUGUGAUUUUAAUAGCUUCUUAGGAGAAUGACAAAAAAAAAAAAAAAAAAAAAAAAAAAAAAAAA	UUACACAGCUGGACAGAGGCA
NC_045512.2	222	227	222	227	0	hsa-miR-4775	5	10	5	10	0.05	-1.19	-1.24	-0.139593	AAAAAA&UUUUUU	((((((&))))))	CAAUCUUUAAUCAGUGUGUAACAUUAGGGAGGACUUGAAAGAGCCACCACAUUUUCACCGAGGCCACGCGGAGUACGAUCGAGUGUACAGUGAACAAUGCUAGGGAGAGCUGCCUAUAUGGAAGAGCCCUAAUGUGUAAAAUUAAUUUUAGUAGUGCUAUCCCCAUGUGAUUUUAAUAGCUUCUUAGGAGAAUGACAAAAAAAAAAAAAAAAAAAAAAAAAAAAAAAAA	UUAAUUUUUUGUUUCGGUCACU
NC_045512.2	216	221	216	221	0	hsa-miR-4775	5	10	5	10	0.05	-1.19	-1.24	-0.139593	AAAAAA&UUUUUU	((((((&))))))	CAAUCUUUAAUCAGUGUGUAACAUUAGGGAGGACUUGAAAGAGCCACCACAUUUUCACCGAGGCCACGCGGAGUACGAUCGAGUGUACAGUGAACAAUGCUAGGGAGAGCUGCCUAUAUGGAAGAGCCCUAAUGUGUAAAAUUAAUUUUAGUAGUGCUAUCCCCAUGUGAUUUUAAUAGCUUCUUAGGAGAAUGACAAAAAAAAAAAAAAAAAAAAAAAAAAAAAAAAA	UUAAUUUUUUGUUUCGGUCACU
NC_045512.2	209	214	209	214	0	hsa-miR-4775	5	10	5	10	0.05	-1.19	-1.24	-0.139593	AAAAAA&UUUUUU	((((((&))))))	CAAUCUUUAAUCAGUGUGUAACAUUAGGGAGGACUUGAAAGAGCCACCACAUUUUCACCGAGGCCACGCGGAGUACGAUCGAGUGUACAGUGAACAAUGCUAGGGAGAGCUGCCUAUAUGGAAGAGCCCUAAUGUGUAAAAUUAAUUUUAGUAGUGCUAUCCCCAUGUGAUUUUAAUAGCUUCUUAGGAGAAUGACAAAAAAAAAAAAAAAAAAAAAAAAAAAAAAAAA	UUAAUUUUUUGUUUCGGUCACU
NC_045512.2	172	177	172	177	0.8	hsa-miR-5088-5p	13	18	13	18	0.13	-0.12	-1.05	-0.0139344	UUUAAU&AUUGGA	((((((&))))))	CAAUCUUUAAUCAGUGUGUAACAUUAGGGAGGACUUGAAAGAGCCACCACAUUUUCACCGAGGCCACGCGGAGUACGAUCGAGUGUACAGUGAACAAUGCUAGGGAGAGCUGCCUAUAUGGAAGAGCCCUAAUGUGUAAAAUUAAUUUUAGUAGUGCUAUCCCCAUGUGAUUUUAAUAGCUUCUUAGGAGAAUGACAAAAAAAAAAAAAAAAAAAAAAAAAAAAAAAAA	CAGGGCUCAGGGAUUGGAUGGAGG

## Sheet: RNA22 3UTR miRDB
miR Name	transcript name	leftmost position of	folding energy	heteroduplex	p value
		predicted target site	(in -Kcal/mol)
hsa_miR_1236_3p_MIMAT0005591_	NC_045512.2 3UTR	102	-17.1	AGGGAGAGCTGCCTATATGGAAGAGC	0.33
				|||||| :| |||||||
				GACCTCTC--TG--TTCCCCTTCTCC
hsa_miR_4717_3p_MIMAT0019830_	NC_045512.2 3UTR	103	-16	GGG--AGAGCTGCCTATATGG	0.33
				:|| ||| ||:|| ||
				TCCGGTGTCGGTGGGTACACA

## Sheet: RNAhybrid 3UTR miRDB
Version: RNAhybrid 2.2
Command line:/vol/bioapps/bin/RNAhybrid.bin -n 24 -q /var/bibiserv2/anonymous/rnahybrid/03/12/47/bibiserv2_2021-03-03_124710_TAcxd/rnahybrid_input_mirna_sequences.file -m 229 -s 3utr_human -b 10 -t /var/bibiserv2/anonymous/rnahybrid/03/12/47/bibiserv2_2021-03-03_124710_TAcxd/rnahybrid_input_target_rna_sequences_.file
searching
dataset: 1
mde of hsa-miR-3941: -42.699993
mde of hsa-miR-466: -45.199997
mde of hsa-miR-4775: -36.799999
mde of hsa-miR-4717-3p: -51.299999
mde of hsa-miR-5088-5p: -58.099995
mde of hsa-miR-603: -40.400002
mde of hsa-miR-6749-3p: -56.300003
mde of hsa-miR-1236-3p: -52.000000
mde of hsa-miR-4279: -40.199997
mde of hsa-miR-4672: -46.800003
Individual hits
------------------------------------------------------------
dataset: 1
target: NC_045512.2
length: 229
miRNA : hsa-miR-3941
length: 22
mfe: -19.2 kcal/mol
p-value: 1.000000e+00
position 2
target 5' A AUCA C 3'
AUCUUUA GUGUGUAA
UAGGAGU CACACAUU
miRNA 3' AUAC CAA 5'
------------------------------------------------------------
dataset: 1
target: NC_045512.2
length: 229
miRNA : hsa-miR-3941
length: 22
mfe: -15.4 kcal/mol
p-value: 1.000000e+00
position 153
target 5' A CU C A 3'
GUG AUCC CA UGUG
UAC UAGG GU ACAC
miRNA 3' A A CA ACAUU 5'
------------------------------------------------------------
dataset: 1
target: NC_045512.2
length: 229
miRNA : hsa-miR-3941
length: 22
mfe: -15.1 kcal/mol
p-value: 1.000000e+00
position 116
target 5' A AAGAGC AA A 3'
UAUGG CCU UGUGUAA
AUACU GGA ACACAUU
miRNA 3' A GUCAAC 5'
------------------------------------------------------------
dataset: 1
target: NC_045512.2
length: 229
miRNA : hsa-miR-3941
length: 22
mfe: -12.6 kcal/mol
p-value: 1.000000e+00
position 76
target 5' C G GUACA A 3'
GAUC AGU GUG
CUAG UCA CAC
miRNA 3' AUA GAG ACA AUU 5'
------------------------------------------------------------
dataset: 1
target: NC_045512.2
length: 229
miRNA : hsa-miR-3941
length: 22
mfe: -12.5 kcal/mol
p-value: 1.000000e+00
position 178
target 5' A C GA AA A 3'
G UUCUUAG G UG
C AGGAGUC C AC
miRNA 3' AUA U AA AC AUU 5'
------------------------------------------------------------
dataset: 1
target: NC_045512.2
length: 229
miRNA : hsa-miR-3941
length: 22
mfe: -10.4 kcal/mol
p-value: 1.000000e+00
position 59
target 5' C GG ACG A 3'
GA CC CGG
CU GG GUC
miRNA 3' AUA A A AACACACAUU 5'
------------------------------------------------------------
dataset: 1
target: NC_045512.2
length: 229
miRNA : hsa-miR-3941
length: 22
mfe: -9.0 kcal/mol
p-value: 1.000000e+00
position 50
target 5' C C 3'
AUUUUCA
UAGGAGU
miRNA 3' AUAC CAACACACAUU 5'
------------------------------------------------------------
dataset: 1
target: NC_045512.2
length: 229
miRNA : hsa-miR-3941
length: 22
mfe: -8.7 kcal/mol
p-value: 1.000000e+00
position 168
target 5' N A 3'
GAUUUU
CUAGGA
miRNA 3' AUA GUCAACACACAUU 5'
------------------------------------------------------------
dataset: 1
target: NC_045512.2
length: 229
miRNA : hsa-miR-3941
length: 22
mfe: -8.4 kcal/mol
p-value: 1.000000e+00
position 40
target 5' A G A 3'
GA CC
CU GG
miRNA 3' AUA A AGUCAACACACAUU 5'
------------------------------------------------------------
dataset: 1
target: NC_045512.2
length: 229
miRNA : hsa-miR-3941
length: 22
mfe: -7.8 kcal/mol
p-value: 1.000000e+00
position 28
target 5' G GGA G 3'
GA CUU
CU GAG
miRNA 3' AUA AG UCAACACACAUU 5'
------------------------------------------------------------
dataset: 1
target: NC_045512.2
length: 229
miRNA : hsa-miR-466
length: 23
mfe: -14.7 kcal/mol
p-value: 1.000000e+00
position 13
target 5' A A 3'
GUGUGUA
CGCACAU
miRNA 3' UACACACAA ACACAUA 5'
------------------------------------------------------------
dataset: 1
target: NC_045512.2
length: 229
miRNA : hsa-miR-466
length: 23
mfe: -14.6 kcal/mol
p-value: 1.000000e+00
position 131
target 5' A AAAAUUAAUUUUA AG UAUCCCC A 3'
AUGUGU GU UGC AUGUG
UACACA CA ACG UACAC
miRNA 3' CACA AUA 5'
------------------------------------------------------------
dataset: 1
target: NC_045512.2
length: 229
miRNA : hsa-miR-466
length: 23
mfe: -13.5 kcal/mol
p-value: 1.000000e+00
position 67
target 5' C GA CGAUCGA C 3'
GCG GUA GUGUA
CGC CAU CACAU
miRNA 3' UACACACAA A A A 5'
------------------------------------------------------------
dataset: 1
target: NC_045512.2
length: 229
miRNA : hsa-miR-466
length: 23
mfe: -10.0 kcal/mol
p-value: 1.000000e+00
position 110
target 5' C CUA G 3'
UGC UAUG
ACG AUAC
miRNA 3' UACACACA CAC ACAUA 5'
------------------------------------------------------------
dataset: 1
target: NC_045512.2
length: 229
miRNA : hsa-miR-466
length: 23
mfe: -9.6 kcal/mol
p-value: 1.000000e+00
position 89
target 5' A AACAA U 3'
GUG UGC
CAC ACG
miRNA 3' UA ACA CACAUACACAUA 5'
------------------------------------------------------------
dataset: 1
target: NC_045512.2
length: 229
miRNA : hsa-miR-466
length: 23
mfe: -6.8 kcal/mol
p-value: 1.000000e+00
position 178
target 5' A U 3'
GC
CG
miRNA 3' UACACACAA CACAUACACAUA 5'
------------------------------------------------------------
dataset: 1
target: NC_045512.2
length: 229
miRNA : hsa-miR-466
length: 23
mfe: -6.4 kcal/mol
p-value: 1.000000e+00
position 42
target 5' A C 3'
GC
CG
miRNA 3' UACACACAA CACAUACACAUA 5'
------------------------------------------------------------
dataset: 1
target: NC_045512.2
length: 229
miRNA : hsa-miR-466
length: 23
mfe: -6.4 kcal/mol
p-value: 1.000000e+00
position 59
target 5' C AG C 3'
G GC
C CG
miRNA 3' UACACA AA CACAUACACAUA 5'
------------------------------------------------------------
dataset: 1
target: NC_045512.2
length: 229
miRNA : hsa-miR-466
length: 23
mfe: -6.4 kcal/mol
p-value: 1.000000e+00
position 125
target 5' A C 3'
GC
CG
miRNA 3' UACACACAA CACAUACACAUA 5'
------------------------------------------------------------
dataset: 1
target: NC_045512.2
length: 229
miRNA : hsa-miR-466
length: 23
mfe: -5.8 kcal/mol
p-value: 1.000000e+00
position 191
target 5' A A 3'
AUG
UAC
miRNA 3' UACACACAACGCACA ACAUA 5'
------------------------------------------------------------
dataset: 1
target: NC_045512.2
length: 229
miRNA : hsa-miR-4775
length: 22
mfe: -15.7 kcal/mol
p-value: 1.000000e+00
position 76
target 5' C UGU U C 3'
GAUCGAG ACAG GAA
CUGGCUU UGUU UUU
miRNA 3' UCA U AAUU 5'
------------------------------------------------------------
dataset: 1
target: NC_045512.2
length: 229
miRNA : hsa-miR-4775
length: 22
mfe: -15.3 kcal/mol
p-value: 1.000000e+00
position 56
target 5' C CACGC A 3'
ACCGAGGC GGAGU
UGGCUUUG UUUUA
miRNA 3' UCAC UU AUU 5'
------------------------------------------------------------
dataset: 1
target: NC_045512.2
length: 229
miRNA : hsa-miR-4775
length: 22
mfe: -14.6 kcal/mol
p-value: 1.000000e+00
position 12
target 5' C UG UU G 3'
AGUG U AACA AGG
UCAC G UUGU UUU
miRNA 3' UG CU UU AAUU 5'
------------------------------------------------------------
dataset: 1
target: NC_045512.2
length: 229
miRNA : hsa-miR-4775
length: 22
mfe: -14.5 kcal/mol
p-value: 1.000000e+00
position 166
target 5' U UUAAUAGCUUCUUAG GAAU A 3'
GUGAUU GA GACAAAAAA
CACUGG CU UUGUUUUUU
miRNA 3' U AAUU 5'
------------------------------------------------------------
dataset: 1
target: NC_045512.2
length: 229
miRNA : hsa-miR-4775
length: 22
mfe: -12.2 kcal/mol
p-value: 1.000000e+00
position 29
target 5' G U G C 3'
AG GAC UGAAA AG
UC CUG GCUUU UU
miRNA 3' A G UUUUAAUU 5'
------------------------------------------------------------
dataset: 1
target: NC_045512.2
length: 229
miRNA : hsa-miR-4775
length: 22
mfe: -11.8 kcal/mol
p-value: 1.000000e+00
position 107
target 5' G CU UAU UG C 3'
AG GCC A GAAGAG
UC UGG U UUUUUU
miRNA 3' AC CU UG AAUU 5'
------------------------------------------------------------
dataset: 1
target: NC_045512.2
length: 229
miRNA : hsa-miR-4775
length: 22
mfe: -11.3 kcal/mol
p-value: 1.000000e+00
position 125
target 5' N CU UGU U 3'
GCC AAUG AAAAUUAA
UGG UUGU UUUUAAUU
miRNA 3' UCAC CU U 5'
------------------------------------------------------------
dataset: 1
target: NC_045512.2
length: 229
miRNA : hsa-miR-4775
length: 22
mfe: -9.3 kcal/mol
p-value: 1.000000e+00
position 152
target 5' U A 3'
AGUG CU
UCAC GG
miRNA 3' U CUUUGUUUUUUAAUU 5'
------------------------------------------------------------
dataset: 1
target: NC_045512.2
length: 229
miRNA : hsa-miR-4775
length: 22
mfe: -7.9 kcal/mol
p-value: 1.000000e+00
position 42
target 5' N A 3'
GCC
UGG
miRNA 3' UCAC CUUUGUUUUUUAAUU 5'
------------------------------------------------------------
dataset: 1
target: NC_045512.2
length: 229
miRNA : hsa-miR-4775
length: 22
mfe: -7.9 kcal/mol
p-value: 1.000000e+00
position 45
target 5' C A 3'
ACC
UGG
miRNA 3' UCAC CUUUGUUUUUUAAUU 5'
------------------------------------------------------------
dataset: 1
target: NC_045512.2
length: 229
miRNA : hsa-miR-4717-3p
length: 21
mfe: -26.3 kcal/mol
p-value: 1.000000e+00
position 102
target 5' A AGA U UAUAUGGAAGA UA A 3'
GGG GC GCC GCCC AUGUGU
UCC UG CGG UGGG UACACA
miRNA 3' GG U 5'
------------------------------------------------------------
dataset: 1
target: NC_045512.2
length: 229
miRNA : hsa-miR-4717-3p
length: 21
mfe: -25.6 kcal/mol
p-value: 1.000000e+00
position 151
target 5' G GU UC A 3'
UA GCUA CCCAUGUG
GU CGGU GGGUACAC
miRNA 3' UCCG GU A 5'
------------------------------------------------------------
dataset: 1
target: NC_045512.2
length: 229
miRNA : hsa-miR-4717-3p
length: 21
mfe: -25.5 kcal/mol
p-value: 1.000000e+00
position 60
target 5' G G AGUACGA A A 3'
AGGCCAC GC G UCG GUGU
UCCGGUG CG U GGU CACA
miRNA 3' U G G A 5'
------------------------------------------------------------
dataset: 1
target: NC_045512.2
length: 229
miRNA : hsa-miR-4717-3p
length: 21
mfe: -23.8 kcal/mol
p-value: 1.000000e+00
position 29
target 5' G A UG AAGA A U 3'
AGG CU A GCCACC CAU
UCC GG U CGGUGG GUA
miRNA 3' UG CACA 5'
------------------------------------------------------------
dataset: 1
target: NC_045512.2
length: 229
miRNA : hsa-miR-4717-3p
length: 21
mfe: -14.6 kcal/mol
p-value: 1.000000e+00
position 175
target 5' A U G 3'
AUAGCU CUUA
UGUCGG GGGU
miRNA 3' UCCGG U ACACA 5'
------------------------------------------------------------
dataset: 1
target: NC_045512.2
length: 229
miRNA : hsa-miR-4717-3p
length: 21
mfe: -13.5 kcal/mol
p-value: 1.000000e+00
position 9
target 5' A A A 3'
AUC GUGUGU
UGG UACACA
miRNA 3' UCCGGUGUCGG G 5'
------------------------------------------------------------
dataset: 1
target: NC_045512.2
length: 229
miRNA : hsa-miR-4717-3p
length: 21
mfe: -13.5 kcal/mol
p-value: 1.000000e+00
position 85
target 5' N GA A C 3'
UACAGU AC AUG
GUGUCG UG UAC
miRNA 3' UCCG G GG ACA 5'
------------------------------------------------------------
dataset: 1
target: NC_045512.2
length: 229
miRNA : hsa-miR-4717-3p
length: 21
mfe: -7.9 kcal/mol
p-value: 1.000000e+00
position 185
target 5' N AGAAU A A 3'
AGG G CA
UCC C GU
miRNA 3' GGUGU G GGGUACACA 5'
------------------------------------------------------------
dataset: 1
target: NC_045512.2
length: 229
miRNA : hsa-miR-4717-3p
length: 21
mfe: -7.3 kcal/mol
p-value: 1.000000e+00
position 54
target 5' U C 3'
UCAC
GGUG
miRNA 3' UCC UCGGUGGGUACACA 5'
------------------------------------------------------------
dataset: 1
target: NC_045512.2
length: 229
miRNA : hsa-miR-4717-3p
length: 21
mfe: -6.9 kcal/mol
p-value: 1.000000e+00
position 21
target 5' A A 3'
CAUU
GUGG
miRNA 3' UCCGGUGUCG GUACACA 5'
------------------------------------------------------------
dataset: 1
target: NC_045512.2
length: 229
miRNA : hsa-miR-5088-5p
length: 24
mfe: -21.8 kcal/mol
p-value: 1.000000e+00
position 43
target 5' G CAUUU A G A 3'
CCA CCA UC CC GAG CC
GGU GGU AG GG CUC GG
miRNA 3' GGA A U A G AC 5'
------------------------------------------------------------
dataset: 1
target: NC_045512.2
length: 229
miRNA : hsa-miR-5088-5p
length: 24
mfe: -20.6 kcal/mol
p-value: 1.000000e+00
position 99
target 5' G GGGA GCUG AUAUGGAA A 3'
CUA GA CCU GAGCCCU
GGU UU GGG CUCGGGA
miRNA 3' GGA AGG A A C 5'
------------------------------------------------------------
dataset: 1
target: NC_045512.2
length: 229
miRNA : hsa-miR-5088-5p
length: 24
mfe: -19.2 kcal/mol
p-value: 1.000000e+00
position 160
target 5' U G AAU C 3'
CC CCAU UGAUUUU AGCUU
GG GGUA GUUAGGG UCGGG
miRNA 3' A G AC AC 5'
------------------------------------------------------------
dataset: 1
target: NC_045512.2
length: 229
miRNA : hsa-miR-5088-5p
length: 24
mfe: -16.2 kcal/mol
p-value: 1.000000e+00
position 3
target 5' A A G G AACAUUAGG GA A 3'
UCUUUA UCAGU U U GAG CUUG
GGAGGU GGUUA G A CUC GGAC
miRNA 3' A G G G 5'
------------------------------------------------------------
dataset: 1
target: NC_045512.2
length: 229
miRNA : hsa-miR-5088-5p
length: 24
mfe: -13.2 kcal/mol
p-value: 1.000000e+00
position 75
target 5' A G A 3'
CGAUC GAGU U
GUUAG CUCG G
miRNA 3' GGAGGUAG GGA G AC 5'
------------------------------------------------------------
dataset: 1
target: NC_045512.2
length: 229
miRNA : hsa-miR-5088-5p
length: 24
mfe: -13.1 kcal/mol
p-value: 1.000000e+00
position 141
target 5' A A U G A 3'
UUAAUUUU G AGU CU
GGUUAGGG C UCG GA
miRNA 3' GGAGGUA A G C 5'
------------------------------------------------------------
dataset: 1
target: NC_045512.2
length: 229
miRNA : hsa-miR-5088-5p
length: 24
mfe: -10.9 kcal/mol
p-value: 1.000000e+00
position 181
target 5' N AG AA A 3'
UCUU GAG UG
AGGG CUC AC
miRNA 3' GGAGGUAGGUU A GGG 5'
------------------------------------------------------------
dataset: 1
target: NC_045512.2
length: 229
miRNA : hsa-miR-5088-5p
length: 24
mfe: -8.4 kcal/mol
p-value: 1.000000e+00
position 64
target 5' N CG G U 3'
CA C GAG
GU G CUC
miRNA 3' GGAGGUAG UA GGA GGGAC 5'
------------------------------------------------------------
dataset: 1
target: NC_045512.2
length: 229
miRNA : hsa-miR-5088-5p
length: 24
mfe: -7.5 kcal/mol
p-value: 1.000000e+00
position 132
target 5' A U A 3'
UG GU
AC CG
miRNA 3' GGAGGUAGGUUAGGG U GGAC 5'
------------------------------------------------------------
dataset: 1
target: NC_045512.2
length: 229
miRNA : hsa-miR-5088-5p
length: 24
mfe: -7.0 kcal/mol
p-value: 1.000000e+00
position 87
target 5' A G 3'
CAGU
GUUA
miRNA 3' GGAGGUAG GGGACUCGGGAC 5'
------------------------------------------------------------
dataset: 1
target: NC_045512.2
length: 229
miRNA : hsa-miR-603
length: 22
mfe: -18.1 kcal/mol
p-value: 1.000000e+00
position 135
target 5' U U UUA CUAUCCCCA A 3'
GUAAAA UAAUU GUAGUG UGUG
CGUUUU AUUAA CGUCAC ACAC
miRNA 3' C 5'
------------------------------------------------------------
dataset: 1
target: NC_045512.2
length: 229
miRNA : hsa-miR-603
length: 22
mfe: -17.2 kcal/mol
p-value: 1.000000e+00
position 7
target 5' U A 3'
UAAU CAGUGUGU
AUUA GUCACACA
miRNA 3' CGUUUUC AC C 5'
------------------------------------------------------------
dataset: 1
target: NC_045512.2
length: 229
miRNA : hsa-miR-603
length: 22
mfe: -15.3 kcal/mol
p-value: 1.000000e+00
position 67
target 5' C AC C ACA A 3'
GCGGA GU GAU G AGUGU GUG
CGUUU CA UUA C UCACA CAC
miRNA 3' U A G 5'
------------------------------------------------------------
dataset: 1
target: NC_045512.2
length: 229
miRNA : hsa-miR-603
length: 22
mfe: -9.4 kcal/mol
p-value: 1.000000e+00
position 102
target 5' A G C C 3'
G GAGAG UGC
C UUUUC ACG
miRNA 3' G AUUA UCACACAC 5'
------------------------------------------------------------
dataset: 1
target: NC_045512.2
length: 229
miRNA : hsa-miR-603
length: 22
mfe: -8.1 kcal/mol
p-value: 1.000000e+00
position 26
target 5' A GAC A 3'
GGGAG UUG
UUUUC AAC
miRNA 3' CG AUU GUCACACAC 5'
------------------------------------------------------------
dataset: 1
target: NC_045512.2
length: 229
miRNA : hsa-miR-603
length: 22
mfe: -7.8 kcal/mol
p-value: 1.000000e+00
position 184
target 5' U A 3'
UAGGAG
GUUUUC
miRNA 3' C AUUAACGUCACACAC 5'
------------------------------------------------------------
dataset: 1
target: NC_045512.2
length: 229
miRNA : hsa-miR-603
length: 22
mfe: -7.8 kcal/mol
p-value: 1.000000e+00
position 97
target 5' A U 3'
UGC
ACG
miRNA 3' CGUUUUCAUUA UCACACAC 5'
------------------------------------------------------------
dataset: 1
target: NC_045512.2
length: 229
miRNA : hsa-miR-603
length: 22
mfe: -7.5 kcal/mol
p-value: 1.000000e+00
position 36
target 5' N A 3'
GAAAG
UUUUC
miRNA 3' CG AUUAACGUCACACAC 5'
------------------------------------------------------------
dataset: 1
target: NC_045512.2
length: 229
miRNA : hsa-miR-603
length: 22
mfe: -7.5 kcal/mol
p-value: 1.000000e+00
position 173
target 5' U A U 3'
UAAU GC
AUUA CG
miRNA 3' CGUUUUC A UCACACAC 5'
------------------------------------------------------------
dataset: 1
target: NC_045512.2
length: 229
miRNA : hsa-miR-603
length: 22
mfe: -7.3 kcal/mol
p-value: 1.000000e+00
position 119
target 5' U A 3'
GGAAG
UUUUC
miRNA 3' CG AUUAACGUCACACAC 5'
------------------------------------------------------------
dataset: 1
target: NC_045512.2
length: 229
miRNA : hsa-miR-6749-3p
length: 21
mfe: -21.4 kcal/mol
p-value: 1.000000e+00
position 59
target 5' C A C U 3'
G GGCCA GC GGAG
C CCGGU CG CCUC
miRNA 3' GA C UCC CUC 5'
------------------------------------------------------------
dataset: 1
target: NC_045512.2
length: 229
miRNA : hsa-miR-6749-3p
length: 21
mfe: -20.5 kcal/mol
p-value: 1.000000e+00
position 10
target 5' A U GUAACAUUA C 3'
UCAG GU GGGAGGA
GGUC CG CCCUCCU
miRNA 3' GACCC UC C 5'
------------------------------------------------------------
dataset: 1
target: NC_045512.2
length: 229
miRNA : hsa-miR-6749-3p
length: 21
mfe: -19.9 kcal/mol
p-value: 1.000000e+00
position 98
target 5' U G A CUGCCUAUAU A C 3'
GCUAGG AG G GGA GAG
CGGUCC UC C CCU CUC
miRNA 3' GACC G C 5'
------------------------------------------------------------
dataset: 1
target: NC_045512.2
length: 229
miRNA : hsa-miR-6749-3p
length: 21
mfe: -13.1 kcal/mol
p-value: 1.000000e+00
position 178
target 5' A UCU A A 3'
GCU UAGG GA
CGG GUCC CU
miRNA 3' GACC UCC C CCUC 5'
------------------------------------------------------------
dataset: 1
target: NC_045512.2
length: 229
miRNA : hsa-miR-6749-3p
length: 21
mfe: -10.9 kcal/mol
p-value: 1.000000e+00
position 40
target 5' A A C 3'
G GCCA
C CGGU
miRNA 3' GA C CCGUCCCCUCCUC 5'
------------------------------------------------------------
dataset: 1
target: NC_045512.2
length: 229
miRNA : hsa-miR-6749-3p
length: 21
mfe: -8.9 kcal/mol
p-value: 1.000000e+00
position 125
target 5' N CUAAU U A 3'
GCC G GUA
CGG C CGU
miRNA 3' GACC U CCCCUCCUC 5'
------------------------------------------------------------
dataset: 1
target: NC_045512.2
length: 229
miRNA : hsa-miR-6749-3p
length: 21
mfe: -8.7 kcal/mol
p-value: 1.000000e+00
position 153
target 5' A U U 3'
G GCUA
C CGGU
miRNA 3' GA C CCGUCCCCUCCUC 5'
------------------------------------------------------------
dataset: 1
target: NC_045512.2
length: 229
miRNA : hsa-miR-6749-3p
length: 21
mfe: -8.4 kcal/mol
p-value: 1.000000e+00
position 82
target 5' A U UA U 3'
G G CAG
C C GUC
miRNA 3' GA CG CGUCCCCUCCUC 5'
------------------------------------------------------------
dataset: 1
target: NC_045512.2
length: 229
miRNA : hsa-miR-6749-3p
length: 21
mfe: -8.4 kcal/mol
p-value: 1.000000e+00
position 162
target 5' C U G 3'
CCA GU
GGU CG
miRNA 3' GACCC C UCCCCUCCUC 5'
------------------------------------------------------------
dataset: 1
target: NC_045512.2
length: 229
miRNA : hsa-miR-6749-3p
length: 21
mfe: -6.9 kcal/mol
p-value: 1.000000e+00
position 46
target 5' A C 3'
CCA
GGU
miRNA 3' GACCC CCGUCCCCUCCUC 5'
------------------------------------------------------------
dataset: 1
target: NC_045512.2
length: 229
miRNA : hsa-miR-1236-3p
length: 22
mfe: -24.5 kcal/mol
p-value: 1.000000e+00
position 103
target 5' G CU CUAUAU C 3'
GGAGAG GC GGAAGAG
CCUCUC UG CCUUCUC
miRNA 3' GA UUCC C 5'
------------------------------------------------------------
dataset: 1
target: NC_045512.2
length: 229
miRNA : hsa-miR-1236-3p
length: 22
mfe: -18.8 kcal/mol
p-value: 1.000000e+00
position 27
target 5' G UU A C 3'
GGAG GAC G AAGAG
CCUC CUG C UUCUC
miRNA 3' GA U UUCC C C 5'
------------------------------------------------------------
dataset: 1
target: NC_045512.2
length: 229
miRNA : hsa-miR-1236-3p
length: 22
mfe: -17.8 kcal/mol
p-value: 1.000000e+00
position 186
target 5' A AU A 3'
GGAGA GACAA
CCUCU CUGUU
miRNA 3' GA CCCCUUCUCC 5'
------------------------------------------------------------
dataset: 1
target: NC_045512.2
length: 229
miRNA : hsa-miR-1236-3p
length: 22
mfe: -14.8 kcal/mol
p-value: 1.000000e+00
position 69
target 5' C UAC U U UAC U A 3'
GGAG GA CGAG G AG G
CCUC CU GUUC C UC C
miRNA 3' GA U CCU U C 5'
------------------------------------------------------------
dataset: 1
target: NC_045512.2
length: 229
miRNA : hsa-miR-1236-3p
length: 22
mfe: -10.8 kcal/mol
p-value: 1.000000e+00
position 59
target 5' C C 3'
GAGGC
CUCUG
miRNA 3' GACCU UUCCCCUUCUCC 5'
------------------------------------------------------------
dataset: 1
target: NC_045512.2
length: 229
miRNA : hsa-miR-1236-3p
length: 22
mfe: -6.6 kcal/mol
p-value: 1.000000e+00
position 91
target 5' N U 3'
GA ACAA
CU UGUU
miRNA 3' GACCU C CCCCUUCUCC 5'
------------------------------------------------------------
dataset: 1
target: NC_045512.2
length: 229
miRNA : hsa-miR-1236-3p
length: 22
mfe: -6.0 kcal/mol
p-value: 1.000000e+00
position 166
target 5' U U U 3'
G GAU
C CUG
miRNA 3' GACCU U UUCCCCUUCUCC 5'
------------------------------------------------------------
dataset: 1
target: NC_045512.2
length: 229
miRNA : hsa-miR-1236-3p
length: 22
mfe: -5.5 kcal/mol
p-value: 1.000000e+00
position 20
target 5' A U 3'
ACA
UGU
miRNA 3' GACCUCUC UCCCCUUCUCC 5'
------------------------------------------------------------
dataset: 1
target: NC_045512.2
length: 229
miRNA : hsa-miR-1236-3p
length: 22
mfe: -5.5 kcal/mol
p-value: 1.000000e+00
position 48
target 5' C U 3'
ACA
UGU
miRNA 3' GACCUCUC UCCCCUUCUCC 5'
------------------------------------------------------------
dataset: 1
target: NC_045512.2
length: 229
miRNA : hsa-miR-1236-3p
length: 22
mfe: -4.5 kcal/mol
p-value: 1.000000e+00
position 149
target 5' U U U U 3'
AG AG GC
UC UC UG
miRNA 3' GACC UUCCCCUUCUCC 5'
------------------------------------------------------------
dataset: 1
target: NC_045512.2
length: 229
miRNA : hsa-miR-4279
length: 16
mfe: -19.3 kcal/mol
p-value: 1.000000e+00
position 26
target 5' A C 3'
GGGAGGA
CCCUCCU
miRNA 3' CUUCGG CUC 5'
------------------------------------------------------------
dataset: 1
target: NC_045512.2
length: 229
miRNA : hsa-miR-4279
length: 16
mfe: -18.7 kcal/mol
p-value: 1.000000e+00
position 59
target 5' C AC C U 3'
GAGGCC G GGAG
CUUCGG C CCUC
miRNA 3' CC U UC 5'
------------------------------------------------------------
dataset: 1
target: NC_045512.2
length: 229
miRNA : hsa-miR-4279
length: 16
mfe: -17.8 kcal/mol
p-value: 1.000000e+00
position 98
target 5' U A C 3'
GCU GGGAGAG
CGG UCCUCUC
miRNA 3' CUU CCC 5'
------------------------------------------------------------
dataset: 1
target: NC_045512.2
length: 229
miRNA : hsa-miR-4279
length: 16
mfe: -17.2 kcal/mol
p-value: 1.000000e+00
position 177
target 5' U UCUU A 3'
AGCU AGGAGA
UCGG UCCUCU
miRNA 3' CU CCC C 5'
------------------------------------------------------------
dataset: 1
target: NC_045512.2
length: 229
miRNA : hsa-miR-4279
length: 16
mfe: -14.8 kcal/mol
p-value: 1.000000e+00
position 111
target 5' U UAUAU A C 3'
GCC GGA GAG
CGG CCU CUC
miRNA 3' CUU CCCU 5'
------------------------------------------------------------
dataset: 1
target: NC_045512.2
length: 229
miRNA : hsa-miR-4279
length: 16
mfe: -12.5 kcal/mol
p-value: 1.000000e+00
position 40
target 5' A A 3'
GAGCC
UUCGG
miRNA 3' C CCCUCCUCUC 5'
------------------------------------------------------------
dataset: 1
target: NC_045512.2
length: 229
miRNA : hsa-miR-4279
length: 16
mfe: -9.0 kcal/mol
p-value: 1.000000e+00
position 125
target 5' N C 3'
GCC
CGG
miRNA 3' CUU CCCUCCUCUC 5'
------------------------------------------------------------
dataset: 1
target: NC_045512.2
length: 229
miRNA : hsa-miR-4279
length: 16
mfe: -7.7 kcal/mol
p-value: 1.000000e+00
position 155
target 5' U A 3'
GCU
CGG
miRNA 3' CUU CCCUCCUCUC 5'
------------------------------------------------------------
dataset: 1
target: NC_045512.2
length: 229
miRNA : hsa-miR-4279
length: 16
mfe: -7.5 kcal/mol
p-value: 1.000000e+00
position 75
target 5' A AUC U U 3'
CG GAG G
GC CUC C
miRNA 3' CUUCG CCUC U 5'
------------------------------------------------------------
dataset: 1
target: NC_045512.2
length: 229
miRNA : hsa-miR-4279
length: 16
mfe: -6.2 kcal/mol
p-value: 1.000000e+00
position 46
target 5' A A 3'
CC
GG
miRNA 3' CUUC CCCUCCUCUC 5'
------------------------------------------------------------
dataset: 1
target: NC_045512.2
length: 229
miRNA : hsa-miR-4672
length: 21
mfe: -22.9 kcal/mol
p-value: 1.000000e+00
position 110
target 5' C AUA GAAGAG CUAA A 3'
UGCCU UG CC UGUGUAA
ACGGA AC GG ACACAUU
miRNA 3' G A UCG 5'
------------------------------------------------------------
dataset: 1
target: NC_045512.2
length: 229
miRNA : hsa-miR-4672
length: 21
mfe: -19.4 kcal/mol
p-value: 1.000000e+00
position 3
target 5' A AA C 3'
UCUUU UCAG UGUGUAA
GGAGA GGUC ACACAUU
miRNA 3' AC CA G 5'
------------------------------------------------------------
dataset: 1
target: NC_045512.2
length: 229
miRNA : hsa-miR-4672
length: 21
mfe: -16.6 kcal/mol
p-value: 1.000000e+00
position 178
target 5' A GA A 3'
GCUUCU UAG G
CGGAGA GUC C
miRNA 3' A CAG GA ACAUU 5'
------------------------------------------------------------
dataset: 1
target: NC_045512.2
length: 229
miRNA : hsa-miR-4672
length: 21
mfe: -15.3 kcal/mol
p-value: 1.000000e+00
position 154
target 5' G A C A 3'
UGCU UC CCA UGUG
ACGG AG GGU ACAC
miRNA 3' ACA CG AUU 5'
------------------------------------------------------------
dataset: 1
target: NC_045512.2
length: 229
miRNA : hsa-miR-4672
length: 21
mfe: -14.8 kcal/mol
p-value: 1.000000e+00
position 57
target 5' A GAG C GGAGUACGAUCGA C 3'
CC G CCA GC GUGUA
GG C GGU CG CACAU
miRNA 3' AC AGA A A U 5'
------------------------------------------------------------
dataset: 1
target: NC_045512.2
length: 229
miRNA : hsa-miR-4672
length: 21
mfe: -11.4 kcal/mol
p-value: 1.000000e+00
position 42
target 5' A A C 3'
GCC CCA
CGG GGU
miRNA 3' A AGACA CGACACAUU 5'
------------------------------------------------------------
dataset: 1
target: NC_045512.2
length: 229
miRNA : hsa-miR-4672
length: 21
mfe: -9.8 kcal/mol
p-value: 1.000000e+00
position 97
target 5' A A GA A 3'
UGCU GG G
ACGG UC C
miRNA 3' AGACAGG GA ACAUU 5'
------------------------------------------------------------
dataset: 1
target: NC_045512.2
length: 229
miRNA : hsa-miR-4672
length: 21
mfe: -9.5 kcal/mol
p-value: 1.000000e+00
position 87
target 5' A G 3'
CAGU
GUCG
miRNA 3' ACGGAGACAG ACACAUU 5'
------------------------------------------------------------
dataset: 1
target: NC_045512.2
length: 229
miRNA : hsa-miR-4672
length: 21
mfe: -9.1 kcal/mol
p-value: 1.000000e+00
position 146
target 5' U A 3'
UUUAGU
AGGUCG
miRNA 3' ACGGAGAC ACACAUU 5'
------------------------------------------------------------
dataset: 1
target: NC_045512.2
length: 229
miRNA : hsa-miR-4672
length: 21
mfe: -7.5 kcal/mol
p-value: 1.000000e+00
position 26
target 5' A GA G 3'
GG G
UC C
miRNA 3' ACGGAGACAGG GA ACAUU 5'
------------------------------------------------------------

## Sheet: STarMir 3UTR miRDB
miRNA	Site_Position	Hybrid Conformation	LogitProb†	Score	Seed_Position	Seed_Type*	3′_bp*	ΔGhybrid	ΔGnucl*	ΔGtotal*	Site_Access*	Seed_Access*	Upstream_Access (15nt)*	Dwstream_Access (10nt)*	Upstream_AU (30nt)*	Dwstream_AU (30nt)*	Site_Location*
hsa-miR-4717-3p	153-170	View	0.898	0.039	164-170	8mer	0	-25.6	-6.3	-15.52	0.665	0.585	0.482	0.264	0.733	0.733	0.664
hsa-miR-4279	179-192	View	0.806	0.018	187-192	7mer-A1	0	-17.2	-0.518	-12.049	0.475	0.346	0.424	0.528	0.667	0.933	0.777
hsa-miR-3941	04-22	View	0.805	0.015	15-21	8mer	0	-19.2	-5.06	-11.057	0.538	0.686	0.038	0.107	0.333	0.5	0.013
hsa-miR-5088-5p	162-183	View	0.803	0.029			0	-19.2	-2.45	-14.678	0.526		0.591	0.657	0.8	0.8	0.703
hsa-miR-4717-3p	153-163	View	0.794	0.039			0	-17.6	-6.114	-13.092	0.715		0.361	0.436	0.733	0.667	0.664
hsa-miR-5088-5p	101-131	View	0.786	0.029	125-131	8mer	0	-20.6	-0.009	-1.241	0.441	0.308	0.512	0.457	0.533	0.8	0.437
hsa-miR-5088-5p	162-181	View	0.778	0.029			0	-16.2	-0.782	-11.574	0.483		0.591	0.654	0.8	0.8	0.703
hsa-miR-4717-3p	153-168	View	0.777	0.039			0	-20.2	-5.44	-11.363	0.688		0.361	0.373	0.733	0.7	0.664
hsa-miR-466	127-139	View	0.756	0.02	133-139	8mer	0	-14.4	-0.081	0.386	0.287	0.396	0.419	0.448	0.533	0.7	0.55
hsa-miR-466	15-21	View	0.752	0.02	16-21	7mer-A1	0	-13.4	-4.934	-8.288	0.686	0.787	0.394	0.11	0.714	0.5	0.061
hsa-miR-4672	180-191	View	0.749	0.023			0	-16.6	-4.686	-12.428	0.543		0.332	0.809	0.667	0.933	0.782
hsa-miR-1236-3p	105-127	View	0.74	0.017	121-127	7mer-m8	0	-24.5	-6.572	-15.812	0.508	0.427	0.585	0.105	0.567	0.733	0.454
hsa-miR-1236-3p	188-199	View	0.736	0.017			1	-17.8	-0.393	-10.414	0.353		0.484	0.998	0.667	1	0.817
hsa-miR-3941	155-170	View	0.721	0.015			0	-15.4	-6.418	-5.256	0.628		0.524	0.407	0.733	0.733	0.672
hsa-miR-5088-5p	162-175	View	0.72	0.029			0	-15.2	-0.782	-7.688	0.448		0.591	0.567	0.8	0.733	0.703
hsa-miR-4775	127-146	View	0.719	0.021	139-145	8mer	0	-11.6	-0.227	3.885	0.351	0.57	0.419	0.517	0.533	0.667	0.55
hsa-miR-6749-3p	100-127	View	0.719	0.023			0	-19.9	-0.928	-10.68	0.492		0.669	0.376	0.533	0.733	0.432
hsa-miR-4717-3p	104-118	View	0.712	0.039			0	-21.8	-0.541	-11.229	0.535		0.617	0.355	0.567	0.7	0.45
hsa-miR-4717-3p	104-121	View	0.709	0.039			0	-23	-0.541	-9.669	0.536		0.617	0.367	0.567	0.733	0.45
hsa-miR-6749-3p	61-72	View	0.663	0.023			1	-19.7	-1.936	-11.792	0.455		0.384	0.528	0.533	0.567	0.262
hsa-miR-4717-3p	104-116	View	0.66	0.039			0	-18.9	-0.647	-7.664	0.482		0.617	0.407	0.567	0.7	0.45
hsa-miR-603	137-170	View	0.656	0.003			1	-18.1	-2.49	-7.274	0.593		0.101	0.407	0.533	0.733	0.594
hsa-miR-6749-3p	61-74	View	0.648	0.023			1	-21.4	-1.562	-10.502	0.481		0.384	0.534	0.533	0.567	0.262
hsa-miR-4279	100-110	View	0.647	0.018			0	-17.8	-5.749	-11.564	0.569		0.669	0.371	0.533	0.567	0.432
hsa-miR-4672	05-22	View	0.633	0.023	16-21	7mer-A1	0	-19.4	-5.078	-11.251	0.513	0.787	0.278	0.107	0.5	0.5	0.017
hsa-miR-4279	100-108	View	0.632	0.018			0	-15.7	-6.346	-9.759	0.615		0.669	0.339	0.533	0.533	0.432
hsa-miR-4717-3p	31-49	View	0.629	0.039			0	-22.4	-0.026	-14.378	0.448		0.101	0.453	0.633	0.433	0.131
hsa-miR-4672	05-20	View	0.629	0.023			0	-16.9	-4.981	-14.064	0.518		0.278	0.347	0.5	0.533	0.017
hsa-miR-4717-3p	31-53	View	0.626	0.039			0	-23.8	-0.026	-14.525	0.484		0.101	0.483	0.633	0.4	0.131
hsa-miR-603	137-157	View	0.62	0.003			1	-16.3	-2.464	-7.718	0.534		0.101	0.531	0.533	0.667	0.594
hsa-miR-4717-3p	41-71	View	0.62	0.039			0	-24.6	-1.015	-8.991	0.422		0.501	0.542	0.6	0.533	0.175
hsa-miR-4672	152-170	View	0.619	0.023			0	-15.8	-0.058	-3.593	0.631		0.366	0.407	0.733	0.733	0.659
hsa-miR-6749-3p	61-70	View	0.604	0.023			1	-15.9	-1.094	-8.338	0.415		0.384	0.555	0.533	0.533	0.262
hsa-miR-4279	28-34	View	0.593	0.018			0	-19.3	-0.009	-3.81	0.29		0.374	0.423	0.704	0.5	0.118
hsa-miR-4717-3p	62-87	View	0.58	0.039			0	-25.5	-1.219	-13.045	0.482		0.396	0.523	0.5	0.5	0.266
hsa-miR-4717-3p	104-138	View	0.579	0.039			0	-26.3	-0.013	-2.713	0.409		0.617	0.579	0.567	0.7	0.45
hsa-miR-6749-3p	100-108	View	0.577	0.023			0	-16.1	-0.928	-10.159	0.615		0.669	0.339	0.533	0.533	0.432
hsa-miR-4279	61-74	View	0.575	0.018			0	-18.7	-1.028	-7.802	0.481		0.384	0.534	0.533	0.567	0.262
hsa-miR-4717-3p	41-75	View	0.573	0.039			0	-24.7	-1.015	-4.912	0.434		0.501	0.55	0.6	0.533	0.175
hsa-miR-5088-5p	45-66	View	0.566	0.029			0	-21.8	0	-9.031	0.44		0.401	0.528	0.567	0.467	0.192
hsa-miR-4672	99-121	View	0.563	0.023			0	-15.5	-0.426	-1.301	0.513		0.61	0.367	0.5	0.733	0.428
hsa-miR-4717-3p	59-68	View	0.563	0.039			0	-18.7	-1.006	-9.281	0.511		0.385	0.546	0.533	0.5	0.253
hsa-miR-4717-3p	124-136	View	0.556	0.039			0	-15.8	-0.011	0.141	0.193		0.376	0.635	0.533	0.7	0.537
hsa-miR-1236-3p	71-110	View	0.554	0.017			0	-19.4	-5.342	-8.634	0.57		0.415	0.371	0.4	0.567	0.306
hsa-miR-5088-5p	89-116	View	0.55	0.029			1	-17.1	-4.681	-2.641	0.518		0.592	0.407	0.367	0.7	0.384
hsa-miR-6749-3p	84-110	View	0.545	0.023			0	-17.9	-6.142	-7.307	0.539		0.602	0.371	0.4	0.567	0.362
hsa-miR-5088-5p	89-113	View	0.539	0.029			1	-16.9	-2.817	-5.167	0.578		0.592	0.364	0.367	0.633	0.384
hsa-miR-4775	58-65	View	0.538	0.021			1	-15.1	-1.465	-7.523	0.448		0.426	0.525	0.5	0.467	0.249
hsa-miR-6749-3p	12-34	View	0.536	0.023	28-34	7mer-m8	0	-20.5	-0.18	1.179	0.36	0.29	0.375	0.401	0.727	0.5	0.048
hsa-miR-4775	78-91	View	0.527	0.021			0	-15.2	-5.357	-8.056	0.564		0.416	0.547	0.4	0.533	0.336
hsa-miR-4672	112-140	View	0.525	0.023	134-139	7mer-A1	0	-22.9	-4.753	-0.617	0.375	0.459	0.593	0.457	0.5	0.667	0.485
hsa-miR-1236-3p	22-34	View	0.521	0.017			0	-17.3	-0.009	3.648	0.162		0.618	0.423	0.667	0.5	0.092
hsa-miR-4717-3p	31-47	View	0.513	0.039			0	-15.4	0	-6.178	0.415		0.101	0.452	0.633	0.4	0.131
hsa-miR-1236-3p	29-44	View	0.504	0.017			0	-18.8	-0.007	-3.138	0.377		0.289	0.465	0.679	0.367	0.122
hsa-miR-603	69-93	View	0.499	0.003			0	-15.3	-0.518	-6.049	0.494		0.511	0.538	0.467	0.533	0.297
hsa-miR-4775	78-95	View	0.498	0.021			0	-15.7	-5.357	-7.475	0.557		0.416	0.51	0.4	0.5	0.336
hsa-miR-3941	118-140	View	0.494	0.015	134-139	7mer-A1	0	-15.1	-4.994	2.454	0.39	0.459	0.52	0.457	0.5	0.667	0.511
hsa-miR-4775	58-75	View	0.493	0.021			1	-15.3	-1.686	-2.091	0.493		0.426	0.55	0.5	0.533	0.249
hsa-miR-4672	112-138	View	0.49	0.023			0	-19.8	-0.035	2.776	0.339		0.611	0.579	0.5	0.7	0.485
hsa-miR-1236-3p	71-107	View	0.486	0.017			0	-15.8	-6.37	-5.256	0.57		0.415	0.342	0.4	0.5	0.306
hsa-miR-5088-5p	23-46	View	0.418	0.029			0	-16.5	-0.027	9.714	0.255		0.605	0.478	0.682	0.433	0.096
hsa-miR-5088-5p	05-38	View	0.344	0.029			0	-16.2	-0.357	8.693	0.362		0.278	0.458	0.5	0.467	0.017
hsa-miR-4775	127-144	View	0.292	0.021	139-144	offset-6mer	0	-9	-0.184	6.028	0.328	0.506	0.419	0.524	0.533	0.667	0.55

## Sheet: List of all microRNAs
	Identified					miRDB	IntaRNA	RNA22		RNAhybrid	STarMir
miRNA	miRDB	IntaRNA	RNA22	RNAhybrid	STarMir	Target Score	E	folding energy	p-value	mfe (kcal/mol)	Logit. Prob.
hsa-miR-3941	x	x		x	x	84	-11.32			-19.2	0.805
hsa-miR-466	x	x		x	x	81	-7.57			-14.7	0.756
hsa-miR-4775	x	x		x	x	78	-6.56			-15.7	0.719
hsa-miR-4717-3p	x	x	x	x	x	68	-10.21	-16	0.33	-26.3	0.898
hsa-miR-5088-5p	x	x		x	x	60	-9.59			-21.8	0.803
hsa-miR-603	x	x		x	x	58	-7.78			-18.1	0.656
hsa-miR-6749-3p	x	x		x	x	55	-9.08			-21.4	0.719
hsa-miR-1236-3p	x	x	x	x	x	54	-7.31	-17.1	0.33	-24.5	0.74
hsa-miR-4279	x	x		x	x	53	-9.93			-19.3	0.806
hsa-miR-4672	x	x		x	x	51	-7.36			-22.9	0.749
