# Supplementary material for: In Silico and In Vitro Analyses Validate Human MicroRNAs Targeting the SARS-CoV-2 3′-UTR
Source: Int J Mol Sci. 2021 Jun 5;22(11):6094. doi: 10.3390/ijms22116094 (PMC8201247; doi:10.3390/ijms22116094)
Supplement: Supplementary file 1 [file ijms-22-06094-s001.zip › Table S2.xlsx]

## Sheet: IntaRNA 3UTR high confidence
id1	start1	end1	seedStart1	seedEnd1	ED1	id2	start2	end2	seedStart2	seedEnd2	ED2	E	E_hybrid	E_norm	subseqDP	hybridDP	seq1	seq2
NC_045512.2	57	74	63	68	7.03	hsa-miR-1307-3p_MIMAT0005951	1	18	7	12	5.87	-19.56	-32.46	-229449	ACCGAGGCCACGCGGAGU&ACUCGGCGUGGCGUCGGU	(((((.(((((((.((((&)))).))))))).)))))	CAAUCUUUAAUCAGUGUGUAACAUUAGGGAGGACUUGAAAGAGCCACCACAUUUUCACCGAGGCCACGCGGAGUACGAUCGAGUGUACAGUGAACAAUGCUAGGGAGAGCUGCCUAUAUGGAAGAGCCCUAAUGUGUAAAAUUAAUUUUAGUAGUGCUAUCCCCAUGUGAUUUUAAUAGCUUCUUAGGAGAAUGACAAAAAAAAAAAAAAAAAAAAAAAAAAAAAAAAA	ACUCGGCGUGGCGUCGGUCGUG
NC_045512.2	79	93	87	92	3.35	hsa-miR-1304-3p_MIMAT0022720	3	17	4	9	0.12	-16.61	-20.08	-194844	UCGAGUGUACAGUGA&UCACUGUAGCCUCGA	(((((..((((((((&))))))))..)))))	CAAUCUUUAAUCAGUGUGUAACAUUAGGGAGGACUUGAAAGAGCCACCACAUUUUCACCGAGGCCACGCGGAGUACGAUCGAGUGUACAGUGAACAAUGCUAGGGAGAGCUGCCUAUAUGGAAGAGCCCUAAUGUGUAAAAUUAAUUUUAGUAGUGCUAUCCCCAUGUGAUUUUAAUAGCUUCUUAGGAGAAUGACAAAAAAAAAAAAAAAAAAAAAAAAAAAAAAAAA	UCUCACUGUAGCCUCGAACCCC
NC_045512.2	58	72	64	69	5.46	hsa-miR-3663-5p_MIMAT0018084	6	21	9	14	2.37	-16.44	-24.27	-193908	CCGAGGCCACGCGGA&UCUGCGUGGUGCUCGG	(((((.(((((((((&)))))))))..)))))	CAAUCUUUAAUCAGUGUGUAACAUUAGGGAGGACUUGAAAGAGCCACCACAUUUUCACCGAGGCCACGCGGAGUACGAUCGAGUGUACAGUGAACAAUGCUAGGGAGAGCUGCCUAUAUGGAAGAGCCCUAAUGUGUAAAAUUAAUUUUAGUAGUGCUAUCCCCAUGUGAUUUUAAUAGCUUCUUAGGAGAAUGACAAAAAAAAAAAAAAAAAAAAAAAAAAAAAAAAA	GCUGGUCUGCGUGGUGCUCGG
NC_045512.2	144	164	159	164	3.35	hsa-miR-5010-5p_MIMAT0021043	3	22	3	8	0.44	-16.44	-20.23	-19285	AAUUUUAGUAGUGCUAUCCCC&GGGGAUGGCAGAGCAAAAUU	((((((.....((((((((((&))))))))))....))))))	CAAUCUUUAAUCAGUGUGUAACAUUAGGGAGGACUUGAAAGAGCCACCACAUUUUCACCGAGGCCACGCGGAGUACGAUCGAGUGUACAGUGAACAAUGCUAGGGAGAGCUGCCUAUAUGGAAGAGCCCUAAUGUGUAAAAUUAAUUUUAGUAGUGCUAUCCCCAUGUGAUUUUAAUAGCUUCUUAGGAGAAUGACAAAAAAAAAAAAAAAAAAAAAAAAAAAAAAAAA	AGGGGGAUGGCAGAGCAAAAUU
NC_045512.2	146	164	154	159	3.27	hsa-miR-128-1-5p_MIMAT0026477	2	23	9	14	3.1	-15	-21.37	-175045	UUUUAGUAGUGCUAUCCCC&GGGGCCGUAGCACUGUCUGAGA	((((((.(((((((.((((&))))...)))))))..))))))	CAAUCUUUAAUCAGUGUGUAACAUUAGGGAGGACUUGAAAGAGCCACCACAUUUUCACCGAGGCCACGCGGAGUACGAUCGAGUGUACAGUGAACAAUGCUAGGGAGAGCUGCCUAUAUGGAAGAGCCCUAAUGUGUAAAAUUAAUUUUAGUAGUGCUAUCCCCAUGUGAUUUUAAUAGCUUCUUAGGAGAAUGACAAAAAAAAAAAAAAAAAAAAAAAAAAAAAAAAA	CGGGGCCGUAGCACUGUCUGAGA
NC_045512.2	60	87	60	65	7.65	hsa-miR-92b-3p_MIMAT0003218	4	21	16	21	0.46	-14.84	-22.95	-174081	GAGGCCACGCGGAGUACGAUCGAGUGUA&UGCACUCGUCCCGGCCUC	((((((....(((.......((((((((&))))))))))).))))))	CAAUCUUUAAUCAGUGUGUAACAUUAGGGAGGACUUGAAAGAGCCACCACAUUUUCACCGAGGCCACGCGGAGUACGAUCGAGUGUACAGUGAACAAUGCUAGGGAGAGCUGCCUAUAUGGAAGAGCCCUAAUGUGUAAAAUUAAUUUUAGUAGUGCUAUCCCCAUGUGAUUUUAAUAGCUUCUUAGGAGAAUGACAAAAAAAAAAAAAAAAAAAAAAAAAAAAAAAAA	UAUUGCACUCGUCCCGGCCUCC
NC_045512.2	92	113	108	113	7	hsa-miR-487a-5p_MIMAT0026559	1	21	1	6	1.61	-14.75	-23.36	-173025	GAACAAUGCUAGGGAGAGCUGC&GUGGUUAUCCCUGCUGUGUUC	(((((..((.(((((.((((((&)))))).)))))))..)))))	CAAUCUUUAAUCAGUGUGUAACAUUAGGGAGGACUUGAAAGAGCCACCACAUUUUCACCGAGGCCACGCGGAGUACGAUCGAGUGUACAGUGAACAAUGCUAGGGAGAGCUGCCUAUAUGGAAGAGCCCUAAUGUGUAAAAUUAAUUUUAGUAGUGCUAUCCCCAUGUGAUUUUAAUAGCUUCUUAGGAGAAUGACAAAAAAAAAAAAAAAAAAAAAAAAAAAAAAAAA	GUGGUUAUCCCUGCUGUGUUCG
NC_045512.2	154	164	159	164	3.01	hsa-miR-4433b-3p_MIMAT0030414	9	19	9	14	0.33	-14.5	-17.84	-171026	GUGCUAUCCCC&GGGGGUGGGAC	((.((((((((&)))))))).))	CAAUCUUUAAUCAGUGUGUAACAUUAGGGAGGACUUGAAAGAGCCACCACAUUUUCACCGAGGCCACGCGGAGUACGAUCGAGUGUACAGUGAACAAUGCUAGGGAGAGCUGCCUAUAUGGAAGAGCCCUAAUGUGUAAAAUUAAUUUUAGUAGUGCUAUCCCCAUGUGAUUUUAAUAGCUUCUUAGGAGAAUGACAAAAAAAAAAAAAAAAAAAAAAAAAAAAAAAAA	CAGGAGUGGGGGGUGGGACGU
NC_045512.2	44	59	51	56	5.89	hsa-miR-6734-5p_MIMAT0027369	6	20	8	13	0.05	-13.83	-19.77	-161392	CCACCACAUUUUCACC&GGGAGAAUGAGGUGG	(((((.(((((((.((&))))))))).)))))	CAAUCUUUAAUCAGUGUGUAACAUUAGGGAGGACUUGAAAGAGCCACCACAUUUUCACCGAGGCCACGCGGAGUACGAUCGAGUGUACAGUGAACAAUGCUAGGGAGAGCUGCCUAUAUGGAAGAGCCCUAAUGUGUAAAAUUAAUUUUAGUAGUGCUAUCCCCAUGUGAUUUUAAUAGCUUCUUAGGAGAAUGACAAAAAAAAAAAAAAAAAAAAAAAAAAAAAAAAA	UUGAGGGGAGAAUGAGGUGGAGA
NC_045512.2	25	45	40	45	6.23	hsa-miR-6741-3p_MIMAT0027384	3	21	3	8	0.49	-13.29	-20.01	-155899	UAGGGAGGACUUGAAAGAGCC&GGCUCUCUCCCUCACCCUA	((((((((....((.((((((&)))))).)))))..)))))	CAAUCUUUAAUCAGUGUGUAACAUUAGGGAGGACUUGAAAGAGCCACCACAUUUUCACCGAGGCCACGCGGAGUACGAUCGAGUGUACAGUGAACAAUGCUAGGGAGAGCUGCCUAUAUGGAAGAGCCCUAAUGUGUAAAAUUAAUUUUAGUAGUGCUAUCCCCAUGUGAUUUUAAUAGCUUCUUAGGAGAAUGACAAAAAAAAAAAAAAAAAAAAAAAAAAAAAAAAA	UCGGCUCUCUCCCUCACCCUAG
NC_045512.2	108	130	109	114	9.55	hsa-miR-365b-5p_MIMAT0022833	1	20	14	19	1.85	-12.8	-24.2	-150151	AGCUGCCUAUAUGGAAGAGCCCU&AGGGACUUUCAGGGGCAGCU	(((((((....((((((..((((&)))).))))))..)))))))	CAAUCUUUAAUCAGUGUGUAACAUUAGGGAGGACUUGAAAGAGCCACCACAUUUUCACCGAGGCCACGCGGAGUACGAUCGAGUGUACAGUGAACAAUGCUAGGGAGAGCUGCCUAUAUGGAAGAGCCCUAAUGUGUAAAAUUAAUUUUAGUAGUGCUAUCCCCAUGUGAUUUUAAUAGCUUCUUAGGAGAAUGACAAAAAAAAAAAAAAAAAAAAAAAAAAAAAAAAA	AGGGACUUUCAGGGGCAGCUGU
NC_045512.2	154	164	156	161	3.01	hsa-miR-877-5p_MIMAT0004949	6	16	9	14	0.19	-12.45	-15.65	-147696	GUGCUAUCCCC&GGAGAUGGCGC	((((((((.((&)).))))))))	CAAUCUUUAAUCAGUGUGUAACAUUAGGGAGGACUUGAAAGAGCCACCACAUUUUCACCGAGGCCACGCGGAGUACGAUCGAGUGUACAGUGAACAAUGCUAGGGAGAGCUGCCUAUAUGGAAGAGCCCUAAUGUGUAAAAUUAAUUUUAGUAGUGCUAUCCCCAUGUGAUUUUAAUAGCUUCUUAGGAGAAUGACAAAAAAAAAAAAAAAAAAAAAAAAAAAAAAAAA	GUAGAGGAGAUGGCGCAGGG
NC_045512.2	151	165	159	164	3.13	hsa-miR-92a-2-5p_MIMAT0004508	4	22	5	10	1.69	-12.42	-17.24	-145693	GUAGUGCUAUCCCCA&UGGGGAUUUGUUGCAUUAC	(((((((.(((((((&))))))).....)))))))	CAAUCUUUAAUCAGUGUGUAACAUUAGGGAGGACUUGAAAGAGCCACCACAUUUUCACCGAGGCCACGCGGAGUACGAUCGAGUGUACAGUGAACAAUGCUAGGGAGAGCUGCCUAUAUGGAAGAGCCCUAAUGUGUAAAAUUAAUUUUAGUAGUGCUAUCCCCAUGUGAUUUUAAUAGCUUCUUAGGAGAAUGACAAAAAAAAAAAAAAAAAAAAAAAAAAAAAAAAA	GGGUGGGGAUUUGUUGCAUUAC
NC_045512.2	59	76	66	71	6.48	hsa-miR-154-5p_MIMAT0000452	4	22	9	14	2.76	-12.38	-21.62	-145224	CGAGGCCACGCGGAGUAC&GUUAUCCGUGUUGCCUUCG	((((((.(((((((..((&))..))))))).))).)))	CAAUCUUUAAUCAGUGUGUAACAUUAGGGAGGACUUGAAAGAGCCACCACAUUUUCACCGAGGCCACGCGGAGUACGAUCGAGUGUACAGUGAACAAUGCUAGGGAGAGCUGCCUAUAUGGAAGAGCCCUAAUGUGUAAAAUUAAUUUUAGUAGUGCUAUCCCCAUGUGAUUUUAAUAGCUUCUUAGGAGAAUGACAAAAAAAAAAAAAAAAAAAAAAAAAAAAAAAAA	UAGGUUAUCCGUGUUGCCUUCG
NC_045512.2	103	112	105	110	4.11	hsa-miR-6741-3p_MIMAT0027384	2	11	4	9	0.48	-12.25	-16.84	-143699	GGGAGAGCUG&CGGCUCUCUC	((((((((((&))))))))))	CAAUCUUUAAUCAGUGUGUAACAUUAGGGAGGACUUGAAAGAGCCACCACAUUUUCACCGAGGCCACGCGGAGUACGAUCGAGUGUACAGUGAACAAUGCUAGGGAGAGCUGCCUAUAUGGAAGAGCCCUAAUGUGUAAAAUUAAUUUUAGUAGUGCUAUCCCCAUGUGAUUUUAAUAGCUUCUUAGGAGAAUGACAAAAAAAAAAAAAAAAAAAAAAAAAAAAAAAAA	UCGGCUCUCUCCCUCACCCUAG
NC_045512.2	102	112	105	110	4.14	hsa-miR-485-3p_MIMAT0002176	9	20	11	16	1.4	-12.22	-17.76	-143347	AGGGAGAGCUG&CGGCUCUCCUCU	(((((((((((&))))))))).))	CAAUCUUUAAUCAGUGUGUAACAUUAGGGAGGACUUGAAAGAGCCACCACAUUUUCACCGAGGCCACGCGGAGUACGAUCGAGUGUACAGUGAACAAUGCUAGGGAGAGCUGCCUAUAUGGAAGAGCCCUAAUGUGUAAAAUUAAUUUUAGUAGUGCUAUCCCCAUGUGAUUUUAAUAGCUUCUUAGGAGAAUGACAAAAAAAAAAAAAAAAAAAAAAAAAAAAAAAAA	GUCAUACACGGCUCUCCUCUCU
NC_045512.2	27	43	27	32	5.87	hsa-miR-877-3p_MIMAT0004950	3	19	14	19	0.01	-12.14	-18.02	-14319	GGGAGGACUUGAAAGAG&CUCUUCUCCCUCCUCCC	(((((((...((.((((&))))))....)))))))	CAAUCUUUAAUCAGUGUGUAACAUUAGGGAGGACUUGAAAGAGCCACCACAUUUUCACCGAGGCCACGCGGAGUACGAUCGAGUGUACAGUGAACAAUGCUAGGGAGAGCUGCCUAUAUGGAAGAGCCCUAAUGUGUAAAAUUAAUUUUAGUAGUGCUAUCCCCAUGUGAUUUUAAUAGCUUCUUAGGAGAAUGACAAAAAAAAAAAAAAAAAAAAAAAAAAAAAAAAA	UCCUCUUCUCCCUCCUCCCAG
NC_045512.2	16	33	18	23	6.06	hsa-miR-130b-5p_MIMAT0004680	3	18	11	16	0.06	-11.95	-18.07	-140949	GUGUAACAUUAGGGAGGA&UCUUUCCCUGUUGCAC	((((((((...(((((((&))))))).))))))))	CAAUCUUUAAUCAGUGUGUAACAUUAGGGAGGACUUGAAAGAGCCACCACAUUUUCACCGAGGCCACGCGGAGUACGAUCGAGUGUACAGUGAACAAUGCUAGGGAGAGCUGCCUAUAUGGAAGAGCCCUAAUGUGUAAAAUUAAUUUUAGUAGUGCUAUCCCCAUGUGAUUUUAAUAGCUUCUUAGGAGAAUGACAAAAAAAAAAAAAAAAAAAAAAAAAAAAAAAAA	ACUCUUUCCCUGUUGCACUAC
NC_045512.2	81	92	81	86	3.09	hsa-miR-122b-3p_MIMAT0019877	7	19	14	19	0.23	-11.85	-15.17	-139007	GAGUGUACAGUG&CAUUGUCACACUC	((((((((((((&)))))).))))))	CAAUCUUUAAUCAGUGUGUAACAUUAGGGAGGACUUGAAAGAGCCACCACAUUUUCACCGAGGCCACGCGGAGUACGAUCGAGUGUACAGUGAACAAUGCUAGGGAGAGCUGCCUAUAUGGAAGAGCCCUAAUGUGUAAAAUUAAUUUUAGUAGUGCUAUCCCCAUGUGAUUUUAAUAGCUUCUUAGGAGAAUGACAAAAAAAAAAAAAAAAAAAAAAAAAAAAAAAAA	AAACACCAUUGUCACACUCCAC
NC_045512.2	42	69	44	49	7.81	hsa-miR-29b-1-5p_MIMAT0004514	1	20	13	18	1.58	-11.58	-20.97	-134467	AGCCACCACAUUUUCACCGAGGCCACGC&GCUGGUUUCAUAUGGUGGUU	((((((((.((.......(((((((.((&))))))))))).))))))))	CAAUCUUUAAUCAGUGUGUAACAUUAGGGAGGACUUGAAAGAGCCACCACAUUUUCACCGAGGCCACGCGGAGUACGAUCGAGUGUACAGUGAACAAUGCUAGGGAGAGCUGCCUAUAUGGAAGAGCCCUAAUGUGUAAAAUUAAUUUUAGUAGUGCUAUCCCCAUGUGAUUUUAAUAGCUUCUUAGGAGAAUGACAAAAAAAAAAAAAAAAAAAAAAAAAAAAAAAAA	GCUGGUUUCAUAUGGUGGUUUAGA
NC_045512.2	8	22	12	17	2.22	hsa-miR-199b-3p_MIMAT0004563	7	22	13	18	1.7	-11.55	-15.47	-135488	UAAUCAGUGUGUAAC&GUCUGCACAUUGGUUA	(((((((((((((((&)).)))))))))))))	CAAUCUUUAAUCAGUGUGUAACAUUAGGGAGGACUUGAAAGAGCCACCACAUUUUCACCGAGGCCACGCGGAGUACGAUCGAGUGUACAGUGAACAAUGCUAGGGAGAGCUGCCUAUAUGGAAGAGCCCUAAUGUGUAAAAUUAAUUUUAGUAGUGCUAUCCCCAUGUGAUUUUAAUAGCUUCUUAGGAGAAUGACAAAAAAAAAAAAAAAAAAAAAAAAAAAAAAAAA	ACAGUAGUCUGCACAUUGGUUA
NC_045512.2	8	22	12	17	2.22	hsa-miR-199a-3p_MIMAT0000232	7	22	13	18	1.7	-11.55	-15.47	-135488	UAAUCAGUGUGUAAC&GUCUGCACAUUGGUUA	(((((((((((((((&)).)))))))))))))	CAAUCUUUAAUCAGUGUGUAACAUUAGGGAGGACUUGAAAGAGCCACCACAUUUUCACCGAGGCCACGCGGAGUACGAUCGAGUGUACAGUGAACAAUGCUAGGGAGAGCUGCCUAUAUGGAAGAGCCCUAAUGUGUAAAAUUAAUUUUAGUAGUGCUAUCCCCAUGUGAUUUUAAUAGCUUCUUAGGAGAAUGACAAAAAAAAAAAAAAAAAAAAAAAAAAAAAAAAA	ACAGUAGUCUGCACAUUGGUUA
NC_045512.2	31	47	40	45	4.31	hsa-miR-203a-5p_MIMAT0031890	2	18	4	9	0.95	-11.54	-16.8	-13337	GGACUUGAAAGAGCCAC&GUGGUUCUUAACAGUUC	(((((...(((((((((&)))))))))...)))))	CAAUCUUUAAUCAGUGUGUAACAUUAGGGAGGACUUGAAAGAGCCACCACAUUUUCACCGAGGCCACGCGGAGUACGAUCGAGUGUACAGUGAACAAUGCUAGGGAGAGCUGCCUAUAUGGAAGAGCCCUAAUGUGUAAAAUUAAUUUUAGUAGUGCUAUCCCCAUGUGAUUUUAAUAGCUUCUUAGGAGAAUGACAAAAAAAAAAAAAAAAAAAAAAAAAAAAAAAAA	AGUGGUUCUUAACAGUUCAACAGUU
NC_045512.2	144	160	154	159	2.87	hsa-miR-183-5p_MIMAT0000261	2	18	3	8	0.48	-11.49	-14.84	-134784	AAUUUUAGUAGUGCUAU&AUGGCACUGGUAGAAUU	(((((((..((((((((&))))))))..)))))))	CAAUCUUUAAUCAGUGUGUAACAUUAGGGAGGACUUGAAAGAGCCACCACAUUUUCACCGAGGCCACGCGGAGUACGAUCGAGUGUACAGUGAACAAUGCUAGGGAGAGCUGCCUAUAUGGAAGAGCCCUAAUGUGUAAAAUUAAUUUUAGUAGUGCUAUCCCCAUGUGAUUUUAAUAGCUUCUUAGGAGAAUGACAAAAAAAAAAAAAAAAAAAAAAAAAAAAAAAAA	UAUGGCACUGGUAGAAUUCACU
NC_045512.2	90	115	90	95	7.8	hsa-miR-323a-5p_MIMAT0004696	1	22	17	22	3.13	-11.49	-22.42	-134784	GUGAACAAUGCUAGGGAGAGCUGCCU&AGGUGGUCCGUGGCGCGUUCGC	((((((...((((.(((...((((((&))))))))).))))..))))))	CAAUCUUUAAUCAGUGUGUAACAUUAGGGAGGACUUGAAAGAGCCACCACAUUUUCACCGAGGCCACGCGGAGUACGAUCGAGUGUACAGUGAACAAUGCUAGGGAGAGCUGCCUAUAUGGAAGAGCCCUAAUGUGUAAAAUUAAUUUUAGUAGUGCUAUCCCCAUGUGAUUUUAAUAGCUUCUUAGGAGAAUGACAAAAAAAAAAAAAAAAAAAAAAAAAAAAAAAAA	AGGUGGUCCGUGGCGCGUUCGC
NC_045512.2	27	43	27	32	5.87	hsa-miR-7111-3p_MIMAT0028120	6	20	15	20	0.01	-11.47	-17.35	-134549	GGGAGGACUUGAAAGAG&CUCUUCCCUCCUCCC	(((((((...((.((((&))))))..)))))))	CAAUCUUUAAUCAGUGUGUAACAUUAGGGAGGACUUGAAAGAGCCACCACAUUUUCACCGAGGCCACGCGGAGUACGAUCGAGUGUACAGUGAACAAUGCUAGGGAGAGCUGCCUAUAUGGAAGAGCCCUAAUGUGUAAAAUUAAUUUUAGUAGUGCUAUCCCCAUGUGAUUUUAAUAGCUUCUUAGGAGAAUGACAAAAAAAAAAAAAAAAAAAAAAAAAAAAAAAAA	AUCCUCUCUUCCCUCCUCCCAG
NC_045512.2	186	195	186	191	2.98	hsa-miR-6758-3p_MIMAT0027417	3	12	7	12	0.03	-11.39	-14.4	-135121	AGGAGAAUGA&UCAUUCUCCU	((((((((((&))))))))))	CAAUCUUUAAUCAGUGUGUAACAUUAGGGAGGACUUGAAAGAGCCACCACAUUUUCACCGAGGCCACGCGGAGUACGAUCGAGUGUACAGUGAACAAUGCUAGGGAGAGCUGCCUAUAUGGAAGAGCCCUAAUGUGUAAAAUUAAUUUUAGUAGUGCUAUCCCCAUGUGAUUUUAAUAGCUUCUUAGGAGAAUGACAAAAAAAAAAAAAAAAAAAAAAAAAAAAAAAAA	ACUCAUUCUCCUCUGUCCAG
NC_045512.2	42	49	43	48	1.38	hsa-miR-29b-2-5p_MIMAT0004515	12	19	13	18	1.49	-11.14	-14.01	-130678	AGCCACCA&UGGUGGCU	((((((((&))))))))	CAAUCUUUAAUCAGUGUGUAACAUUAGGGAGGACUUGAAAGAGCCACCACAUUUUCACCGAGGCCACGCGGAGUACGAUCGAGUGUACAGUGAACAAUGCUAGGGAGAGCUGCCUAUAUGGAAGAGCCCUAAUGUGUAAAAUUAAUUUUAGUAGUGCUAUCCCCAUGUGAUUUUAAUAGCUUCUUAGGAGAAUGACAAAAAAAAAAAAAAAAAAAAAAAAAAAAAAAAA	CUGGUUUCACAUGGUGGCUUAG
NC_045512.2	103	126	120	125	10.53	hsa-miR-320a-5p_MIMAT0037311	6	22	7	12	0.78	-11.04	-22.35	-129505	GGGAGAGCUGCCUAUAUGGAAGAG&CUCUUCCCGGUUCUUCC	((((((((((.......(((((((&)))))))))))))))))	CAAUCUUUAAUCAGUGUGUAACAUUAGGGAGGACUUGAAAGAGCCACCACAUUUUCACCGAGGCCACGCGGAGUACGAUCGAGUGUACAGUGAACAAUGCUAGGGAGAGCUGCCUAUAUGGAAGAGCCCUAAUGUGUAAAAUUAAUUUUAGUAGUGCUAUCCCCAUGUGAUUUUAAUAGCUUCUUAGGAGAAUGACAAAAAAAAAAAAAAAAAAAAAAAAAAAAAAAAA	GCCUUCUCUUCCCGGUUCUUCC
NC_045512.2	107	114	109	114	3.38	hsa-miR-486-3p_MIMAT0004762	4	11	4	9	1.81	-11.01	-16.2	-129862	GAGCUGCC&GGCAGCUC	((((((((&))))))))	CAAUCUUUAAUCAGUGUGUAACAUUAGGGAGGACUUGAAAGAGCCACCACAUUUUCACCGAGGCCACGCGGAGUACGAUCGAGUGUACAGUGAACAAUGCUAGGGAGAGCUGCCUAUAUGGAAGAGCCCUAAUGUGUAAAAUUAAUUUUAGUAGUGCUAUCCCCAUGUGAUUUUAAUAGCUUCUUAGGAGAAUGACAAAAAAAAAAAAAAAAAAAAAAAAAAAAAAAAA	CGGGGCAGCUCAGUACAGGAU
NC_045512.2	61	73	66	71	5.54	hsa-miR-3605-3p_MIMAT0017982	2	14	4	9	0.08	-10.96	-16.58	-1279	AGGCCACGCGGAG&CUCCGUGUUACCU	(((..((((((((&))))))))..)))	CAAUCUUUAAUCAGUGUGUAACAUUAGGGAGGACUUGAAAGAGCCACCACAUUUUCACCGAGGCCACGCGGAGUACGAUCGAGUGUACAGUGAACAAUGCUAGGGAGAGCUGCCUAUAUGGAAGAGCCCUAAUGUGUAAAAUUAAUUUUAGUAGUGCUAUCCCCAUGUGAUUUUAAUAGCUUCUUAGGAGAAUGACAAAAAAAAAAAAAAAAAAAAAAAAAAAAAAAAA	CCUCCGUGUUACCUGUCCUCUAG
NC_045512.2	99	112	99	104	5.69	hsa-let-7a-2-3p_MIMAT0010195	6	17	12	17	1.42	-10.9	-18.01	-127863	GCUAGGGAGAGCUG&CAGCCUCCUAGC	((((((.((.((((&))))))))))))	CAAUCUUUAAUCAGUGUGUAACAUUAGGGAGGACUUGAAAGAGCCACCACAUUUUCACCGAGGCCACGCGGAGUACGAUCGAGUGUACAGUGAACAAUGCUAGGGAGAGCUGCCUAUAUGGAAGAGCCCUAAUGUGUAAAAUUAAUUUUAGUAGUGCUAUCCCCAUGUGAUUUUAAUAGCUUCUUAGGAGAAUGACAAAAAAAAAAAAAAAAAAAAAAAAAAAAAAAAA	CUGUACAGCCUCCUAGCUUUCC
NC_045512.2	7	19	14	19	2.27	hsa-miR-329-3p_MIMAT0001629	2	15	2	7	0.59	-10.86	-13.72	-127394	UUAAUCAGUGUGU&ACACACCUGGUUAA	(((((((((((((&)))))).)))))))	CAAUCUUUAAUCAGUGUGUAACAUUAGGGAGGACUUGAAAGAGCCACCACAUUUUCACCGAGGCCACGCGGAGUACGAUCGAGUGUACAGUGAACAAUGCUAGGGAGAGCUGCCUAUAUGGAAGAGCCCUAAUGUGUAAAAUUAAUUUUAGUAGUGCUAUCCCCAUGUGAUUUUAAUAGCUUCUUAGGAGAAUGACAAAAAAAAAAAAAAAAAAAAAAAAAAAAAAAAA	AACACACCUGGUUAACCUCUUU
NC_045512.2	119	129	119	124	3.66	hsa-miR-20b-3p_MIMAT0004752	11	21	16	21	2.59	-10.8	-17.05	-12669	UGGAAGAGCCC&GGGCACUUCCA	((((((.((((&)))).))))))	CAAUCUUUAAUCAGUGUGUAACAUUAGGGAGGACUUGAAAGAGCCACCACAUUUUCACCGAGGCCACGCGGAGUACGAUCGAGUGUACAGUGAACAAUGCUAGGGAGAGCUGCCUAUAUGGAAGAGCCCUAAUGUGUAAAAUUAAUUUUAGUAGUGCUAUCCCCAUGUGAUUUUAAUAGCUUCUUAGGAGAAUGACAAAAAAAAAAAAAAAAAAAAAAAAAAAAAAAAA	ACUGUAGUAUGGGCACUUCCAG
NC_045512.2	103	110	103	108	4.04	hsa-miR-629-3p_MIMAT0003298	1	8	3	8	0.24	-10.78	-15.06	-126455	GGGAGAGC&GUUCUCCC	((((((((&))))))))	CAAUCUUUAAUCAGUGUGUAACAUUAGGGAGGACUUGAAAGAGCCACCACAUUUUCACCGAGGCCACGCGGAGUACGAUCGAGUGUACAGUGAACAAUGCUAGGGAGAGCUGCCUAUAUGGAAGAGCCCUAAUGUGUAAAAUUAAUUUUAGUAGUGCUAUCCCCAUGUGAUUUUAAUAGCUUCUUAGGAGAAUGACAAAAAAAAAAAAAAAAAAAAAAAAAAAAAAAAA	GUUCUCCCAACGUAAGCCCAGC
NC_045512.2	79	93	88	93	3.35	hsa-miR-3065-5p_MIMAT0015066	10	23	10	15	0.81	-10.71	-14.87	-124982	UCGAGUGUACAGUGA&UCACUGAUGCUGGA	((.(((((.((((((&))))))))))).))	CAAUCUUUAAUCAGUGUGUAACAUUAGGGAGGACUUGAAAGAGCCACCACAUUUUCACCGAGGCCACGCGGAGUACGAUCGAGUGUACAGUGAACAAUGCUAGGGAGAGCUGCCUAUAUGGAAGAGCCCUAAUGUGUAAAAUUAAUUUUAGUAGUGCUAUCCCCAUGUGAUUUUAAUAGCUUCUUAGGAGAAUGACAAAAAAAAAAAAAAAAAAAAAAAAAAAAAAAAA	UCAACAAAAUCACUGAUGCUGGA
NC_045512.2	47	66	51	56	5.99	hsa-miR-664a-5p_MIMAT0005948	3	22	11	16	0.49	-10.7	-17.18	-124248	CCACAUUUUCACCGAGGCCA&UGGCUAGGGAAAAUGAUUGG	((((((((((.((...((((&))))..)))))))))..)))	CAAUCUUUAAUCAGUGUGUAACAUUAGGGAGGACUUGAAAGAGCCACCACAUUUUCACCGAGGCCACGCGGAGUACGAUCGAGUGUACAGUGAACAAUGCUAGGGAGAGCUGCCUAUAUGGAAGAGCCCUAAUGUGUAAAAUUAAUUUUAGUAGUGCUAUCCCCAUGUGAUUUUAAUAGCUUCUUAGGAGAAUGACAAAAAAAAAAAAAAAAAAAAAAAAAAAAAAAAA	ACUGGCUAGGGAAAAUGAUUGGAU
NC_045512.2	27	46	41	46	6.05	hsa-miR-149-5p_MIMAT0000450	3	23	3	8	2.21	-10.69	-18.95	-124749	GGGAGGACUUGAAAGAGCCA&UGGCUCCGUGUCUUCACUCCC	(((((((.......((((((&)))))).......)).)))))	CAAUCUUUAAUCAGUGUGUAACAUUAGGGAGGACUUGAAAGAGCCACCACAUUUUCACCGAGGCCACGCGGAGUACGAUCGAGUGUACAGUGAACAAUGCUAGGGAGAGCUGCCUAUAUGGAAGAGCCCUAAUGUGUAAAAUUAAUUUUAGUAGUGCUAUCCCCAUGUGAUUUUAAUAGCUUCUUAGGAGAAUGACAAAAAAAAAAAAAAAAAAAAAAAAAAAAAAAAA	UCUGGCUCCGUGUCUUCACUCCC
NC_045512.2	81	95	81	86	3.43	hsa-miR-152-5p_MIMAT0026479	3	18	13	18	1.91	-10.64	-15.98	-124165	GAGUGUACAGUGAAC&GUUCUGUGAUACACUC	(((((((((..((((&))))..)).)))))))	CAAUCUUUAAUCAGUGUGUAACAUUAGGGAGGACUUGAAAGAGCCACCACAUUUUCACCGAGGCCACGCGGAGUACGAUCGAGUGUACAGUGAACAAUGCUAGGGAGAGCUGCCUAUAUGGAAGAGCCCUAAUGUGUAAAAUUAAUUUUAGUAGUGCUAUCCCCAUGUGAUUUUAAUAGCUUCUUAGGAGAAUGACAAAAAAAAAAAAAAAAAAAAAAAAAAAAAAAAA	AGGUUCUGUGAUACACUCCGACU
NC_045512.2	27	39	27	32	4.17	hsa-miR-664b-3p_MIMAT0022272	1	14	9	14	0.38	-10.56	-15.11	-123874	GGGAGGACUUGAA&UUCAUUUGCCUCCC	((((((...((((&))))....))))))	CAAUCUUUAAUCAGUGUGUAACAUUAGGGAGGACUUGAAAGAGCCACCACAUUUUCACCGAGGCCACGCGGAGUACGAUCGAGUGUACAGUGAACAAUGCUAGGGAGAGCUGCCUAUAUGGAAGAGCCCUAAUGUGUAAAAUUAAUUUUAGUAGUGCUAUCCCCAUGUGAUUUUAAUAGCUUCUUAGGAGAAUGACAAAAAAAAAAAAAAAAAAAAAAAAAAAAAAAAA	UUCAUUUGCCUCCCAGCCUACA
NC_045512.2	55	76	56	61	7.63	hsa-miR-302a-3p_MIMAT0000684	4	23	17	22	2.04	-10.54	-20.21	-122998	UCACCGAGGCCACGCGGAGUAC&GUGCUUCCAUGUUUUGGUGA	((((((((((.....(((((((&)))))))...))))))))))	CAAUCUUUAAUCAGUGUGUAACAUUAGGGAGGACUUGAAAGAGCCACCACAUUUUCACCGAGGCCACGCGGAGUACGAUCGAGUGUACAGUGAACAAUGCUAGGGAGAGCUGCCUAUAUGGAAGAGCCCUAAUGUGUAAAAUUAAUUUUAGUAGUGCUAUCCCCAUGUGAUUUUAAUAGCUUCUUAGGAGAAUGACAAAAAAAAAAAAAAAAAAAAAAAAAAAAAAAAA	UAAGUGCUUCCAUGUUUUGGUGA
NC_045512.2	103	112	103	108	4.11	hsa-miR-145-5p_MIMAT0000437	4	13	8	13	0.62	-10.48	-15.21	-122298	GGGAGAGCUG&CAGUUUUCCC	((((((((((&))))))))))	CAAUCUUUAAUCAGUGUGUAACAUUAGGGAGGACUUGAAAGAGCCACCACAUUUUCACCGAGGCCACGCGGAGUACGAUCGAGUGUACAGUGAACAAUGCUAGGGAGAGCUGCCUAUAUGGAAGAGCCCUAAUGUGUAAAAUUAAUUUUAGUAGUGCUAUCCCCAUGUGAUUUUAAUAGCUUCUUAGGAGAAUGACAAAAAAAAAAAAAAAAAAAAAAAAAAAAAAAAA	GUCCAGUUUUCCCAGGAAUCCCU
NC_045512.2	26	47	27	32	6.1	hsa-miR-6735-3p_MIMAT0027372	7	19	13	18	3.96	-10.44	-20.5	-122467	AGGGAGGACUUGAAAGAGCCAC&GUGGCUCCUCCCU	(((((((.........((((((&)))))))))))))	CAAUCUUUAAUCAGUGUGUAACAUUAGGGAGGACUUGAAAGAGCCACCACAUUUUCACCGAGGCCACGCGGAGUACGAUCGAGUGUACAGUGAACAAUGCUAGGGAGAGCUGCCUAUAUGGAAGAGCCCUAAUGUGUAAAAUUAAUUUUAGUAGUGCUAUCCCCAUGUGAUUUUAAUAGCUUCUUAGGAGAAUGACAAAAAAAAAAAAAAAAAAAAAAAAAAAAAAAAA	AGGCCUGUGGCUCCUCCCUCAG
NC_045512.2	108	114	109	114	1.45	hsa-miR-4659b-3p_MIMAT0019734	16	22	16	21	0.12	-10.42	-11.99	-122232	AGCUGCC&GGCAGCU	(((((((&)))))))	CAAUCUUUAAUCAGUGUGUAACAUUAGGGAGGACUUGAAAGAGCCACCACAUUUUCACCGAGGCCACGCGGAGUACGAUCGAGUGUACAGUGAACAAUGCUAGGGAGAGCUGCCUAUAUGGAAGAGCCCUAAUGUGUAAAAUUAAUUUUAGUAGUGCUAUCCCCAUGUGAUUUUAAUAGCUUCUUAGGAGAAUGACAAAAAAAAAAAAAAAAAAAAAAAAAAAAAAAAA	UUUCUUCUUAGACAUGGCAGCU
NC_045512.2	63	76	67	72	4.16	hsa-miR-193a-5p_MIMAT0004614	4	15	7	12	2.68	-10.3	-17.14	-120824	GCCACGCGGAGUAC&GUCUUUGCGGGC	(((.(((((((.((&))))))))))))	CAAUCUUUAAUCAGUGUGUAACAUUAGGGAGGACUUGAAAGAGCCACCACAUUUUCACCGAGGCCACGCGGAGUACGAUCGAGUGUACAGUGAACAAUGCUAGGGAGAGCUGCCUAUAUGGAAGAGCCCUAAUGUGUAAAAUUAAUUUUAGUAGUGCUAUCCCCAUGUGAUUUUAAUAGCUUCUUAGGAGAAUGACAAAAAAAAAAAAAAAAAAAAAAAAAAAAAAAAA	UGGGUCUUUGCGGGCGAGAUGA
NC_045512.2	61	76	66	71	5.74	hsa-miR-494-5p_MIMAT0026607	3	18	8	13	0.99	-10.28	-17.01	-119964	AGGCCACGCGGAGUAC&GUUGUCCGUGUUGUCU	((((.(((((((..((&))..))))))).))))	CAAUCUUUAAUCAGUGUGUAACAUUAGGGAGGACUUGAAAGAGCCACCACAUUUUCACCGAGGCCACGCGGAGUACGAUCGAGUGUACAGUGAACAAUGCUAGGGAGAGCUGCCUAUAUGGAAGAGCCCUAAUGUGUAAAAUUAAUUUUAGUAGUGCUAUCCCCAUGUGAUUUUAAUAGCUUCUUAGGAGAAUGACAAAAAAAAAAAAAAAAAAAAAAAAAAAAAAAAA	AGGUUGUCCGUGUUGUCUUCUCU
NC_045512.2	27	33	27	32	3.88	hsa-miR-483-3p_MIMAT0002173	10	16	11	16	0	-10.24	-14.12	-12078	GGGAGGA&UCCUCCC	(((((((&)))))))	CAAUCUUUAAUCAGUGUGUAACAUUAGGGAGGACUUGAAAGAGCCACCACAUUUUCACCGAGGCCACGCGGAGUACGAUCGAGUGUACAGUGAACAAUGCUAGGGAGAGCUGCCUAUAUGGAAGAGCCCUAAUGUGUAAAAUUAAUUUUAGUAGUGCUAUCCCCAUGUGAUUUUAAUAGCUUCUUAGGAGAAUGACAAAAAAAAAAAAAAAAAAAAAAAAAAAAAAAAA	UCACUCCUCUCCUCCCGUCUU
NC_045512.2	54	62	55	60	3.61	hsa-miR-409-3p_MIMAT0001639	9	17	11	16	1.14	-10.23	-14.98	-120003	UUCACCGAG&CUCGGUGAA	(((((((((&)))))))))	CAAUCUUUAAUCAGUGUGUAACAUUAGGGAGGACUUGAAAGAGCCACCACAUUUUCACCGAGGCCACGCGGAGUACGAUCGAGUGUACAGUGAACAAUGCUAGGGAGAGCUGCCUAUAUGGAAGAGCCCUAAUGUGUAAAAUUAAUUUUAGUAGUGCUAUCCCCAUGUGAUUUUAAUAGCUUCUUAGGAGAAUGACAAAAAAAAAAAAAAAAAAAAAAAAAAAAAAAAA	GAAUGUUGCUCGGUGAACCCCU
NC_045512.2	99	112	99	104	5.69	hsa-let-7e-3p_MIMAT0004485	6	17	12	17	1.42	-10.2	-17.31	-119651	GCUAGGGAGAGCUG&CGGCCUCCUAGC	((((((.((.((((&))))))))))))	CAAUCUUUAAUCAGUGUGUAACAUUAGGGAGGACUUGAAAGAGCCACCACAUUUUCACCGAGGCCACGCGGAGUACGAUCGAGUGUACAGUGAACAAUGCUAGGGAGAGCUGCCUAUAUGGAAGAGCCCUAAUGUGUAAAAUUAAUUUUAGUAGUGCUAUCCCCAUGUGAUUUUAAUAGCUUCUUAGGAGAAUGACAAAAAAAAAAAAAAAAAAAAAAAAAAAAAAAAA	CUAUACGGCCUCCUAGCUUUCC
NC_045512.2	13	23	14	19	1.87	hsa-miR-148b-5p_MIMAT0004699	7	17	11	16	1.6	-10.2	-13.67	-119651	AGUGUGUAACA&UGUUAUACACU	(((((((((((&)))))))))))	CAAUCUUUAAUCAGUGUGUAACAUUAGGGAGGACUUGAAAGAGCCACCACAUUUUCACCGAGGCCACGCGGAGUACGAUCGAGUGUACAGUGAACAAUGCUAGGGAGAGCUGCCUAUAUGGAAGAGCCCUAAUGUGUAAAAUUAAUUUUAGUAGUGCUAUCCCCAUGUGAUUUUAAUAGCUUCUUAGGAGAAUGACAAAAAAAAAAAAAAAAAAAAAAAAAAAAAAAAA	AAGUUCUGUUAUACACUCAGGC
NC_045512.2	43	51	45	50	2.61	hsa-miR-3064-5p_MIMAT0019864	10	19	11	16	1.45	-10.14	-14.2	-1196	GCCACCACA&UGUGGUGUGC	(((((((((&))))))).))	CAAUCUUUAAUCAGUGUGUAACAUUAGGGAGGACUUGAAAGAGCCACCACAUUUUCACCGAGGCCACGCGGAGUACGAUCGAGUGUACAGUGAACAAUGCUAGGGAGAGCUGCCUAUAUGGAAGAGCCCUAAUGUGUAAAAUUAAUUUUAGUAGUGCUAUCCCCAUGUGAUUUUAAUAGCUUCUUAGGAGAAUGACAAAAAAAAAAAAAAAAAAAAAAAAAAAAAAAAA	UCUGGCUGUUGUGGUGUGCAA
NC_045512.2	81	94	87	92	3.3	hsa-miR-6837-3p_MIMAT0027577	3	15	5	10	1.99	-10.12	-15.41	-118097	GAGUGUACAGUGAA&UUCACUGUGACUC	((((..((((((((&)))))))).))))	CAAUCUUUAAUCAGUGUGUAACAUUAGGGAGGACUUGAAAGAGCCACCACAUUUUCACCGAGGCCACGCGGAGUACGAUCGAGUGUACAGUGAACAAUGCUAGGGAGAGCUGCCUAUAUGGAAGAGCCCUAAUGUGUAAAAUUAAUUUUAGUAGUGCUAUCCCCAUGUGAUUUUAAUAGCUUCUUAGGAGAAUGACAAAAAAAAAAAAAAAAAAAAAAAAAAAAAAAAA	CCUUCACUGUGACUCUGCUGCAG
NC_045512.2	102	113	102	107	4.15	hsa-miR-6735-3p_MIMAT0027372	7	19	14	19	3.96	-10.11	-18.22	-118596	AGGGAGAGCUGC&GUGGCUCCUCCCU	((((((((((((&)))))).))))))	CAAUCUUUAAUCAGUGUGUAACAUUAGGGAGGACUUGAAAGAGCCACCACAUUUUCACCGAGGCCACGCGGAGUACGAUCGAGUGUACAGUGAACAAUGCUAGGGAGAGCUGCCUAUAUGGAAGAGCCCUAAUGUGUAAAAUUAAUUUUAGUAGUGCUAUCCCCAUGUGAUUUUAAUAGCUUCUUAGGAGAAUGACAAAAAAAAAAAAAAAAAAAAAAAAAAAAAAAAA	AGGCCUGUGGCUCCUCCCUCAG
NC_045512.2	68	80	68	73	3.42	hsa-miR-6842-3p_MIMAT0027587	7	20	15	20	3.36	-10.05	-16.83	-117892	GCGGAGUACGAUC&GGUCUCUGCUCCGC	((((((((.((((&))))..))))))))	CAAUCUUUAAUCAGUGUGUAACAUUAGGGAGGACUUGAAAGAGCCACCACAUUUUCACCGAGGCCACGCGGAGUACGAUCGAGUGUACAGUGAACAAUGCUAGGGAGAGCUGCCUAUAUGGAAGAGCCCUAAUGUGUAAAAUUAAUUUUAGUAGUGCUAUCCCCAUGUGAUUUUAAUAGCUUCUUAGGAGAAUGACAAAAAAAAAAAAAAAAAAAAAAAAAAAAAAAAA	UUGGCUGGUCUCUGCUCCGCAG
NC_045512.2	155	164	156	161	3.01	hsa-miR-3605-5p_MIMAT0017981	4	15	9	14	0.77	-10.04	-13.82	-117164	UGCUAUCCCC&GGAUGGAUAGCA	((((((((((&))..))))))))	CAAUCUUUAAUCAGUGUGUAACAUUAGGGAGGACUUGAAAGAGCCACCACAUUUUCACCGAGGCCACGCGGAGUACGAUCGAGUGUACAGUGAACAAUGCUAGGGAGAGCUGCCUAUAUGGAAGAGCCCUAAUGUGUAAAAUUAAUUUUAGUAGUGCUAUCCCCAUGUGAUUUUAAUAGCUUCUUAGGAGAAUGACAAAAAAAAAAAAAAAAAAAAAAAAAAAAAAAAA	UGAGGAUGGAUAGCAAGGAAGCC
NC_045512.2	153	165	159	164	3.07	hsa-miR-23a-5p_MIMAT0004496	9	21	10	15	4.38	-10.01	-17.46	-117423	AGUGCUAUCCCCA&UGGGGAUGGGAUU	(((.(((((((((&))))))))).)))	CAAUCUUUAAUCAGUGUGUAACAUUAGGGAGGACUUGAAAGAGCCACCACAUUUUCACCGAGGCCACGCGGAGUACGAUCGAGUGUACAGUGAACAAUGCUAGGGAGAGCUGCCUAUAUGGAAGAGCCCUAAUGUGUAAAAUUAAUUUUAGUAGUGCUAUCCCCAUGUGAUUUUAAUAGCUUCUUAGGAGAAUGACAAAAAAAAAAAAAAAAAAAAAAAAAAAAAAAAA	GGGGUUCCUGGGGAUGGGAUUU
NC_045512.2	40	46	40	45	1.32	hsa-miR-1306-3p_MIMAT0005950	5	11	6	11	0.41	-9.95	-11.68	-119533	AGAGCCA&UGGCUCU	(((((((&)))))))	CAAUCUUUAAUCAGUGUGUAACAUUAGGGAGGACUUGAAAGAGCCACCACAUUUUCACCGAGGCCACGCGGAGUACGAUCGAGUGUACAGUGAACAAUGCUAGGGAGAGCUGCCUAUAUGGAAGAGCCCUAAUGUGUAAAAUUAAUUUUAGUAGUGCUAUCCCCAUGUGAUUUUAAUAGCUUCUUAGGAGAAUGACAAAAAAAAAAAAAAAAAAAAAAAAAAAAAAAAA	ACGUUGGCUCUGGUGGUG
NC_045512.2	58	67	61	66	4.24	hsa-miR-548b-5p_MIMAT0004798	11	20	12	17	0.86	-9.93	-15.03	-116484	CCGAGGCCAC&GUGGUUUUGG	((((((((((&))))))))))	CAAUCUUUAAUCAGUGUGUAACAUUAGGGAGGACUUGAAAGAGCCACCACAUUUUCACCGAGGCCACGCGGAGUACGAUCGAGUGUACAGUGAACAAUGCUAGGGAGAGCUGCCUAUAUGGAAGAGCCCUAAUGUGUAAAAUUAAUUUUAGUAGUGCUAUCCCCAUGUGAUUUUAAUAGCUUCUUAGGAGAAUGACAAAAAAAAAAAAAAAAAAAAAAAAAAAAAAAAA	AAAAGUAAUUGUGGUUUUGGCC
NC_045512.2	39	46	40	45	1.43	hsa-miR-4676-3p_MIMAT0019759	15	22	16	21	0.51	-9.89	-11.83	-116015	AAGAGCCA&UGGCUCUU	((((((((&))))))))	CAAUCUUUAAUCAGUGUGUAACAUUAGGGAGGACUUGAAAGAGCCACCACAUUUUCACCGAGGCCACGCGGAGUACGAUCGAGUGUACAGUGAACAAUGCUAGGGAGAGCUGCCUAUAUGGAAGAGCCCUAAUGUGUAAAAUUAAUUUUAGUAGUGCUAUCCCCAUGUGAUUUUAAUAGCUUCUUAGGAGAAUGACAAAAAAAAAAAAAAAAAAAAAAAAAAAAAAAAA	CACUGUUUCACCACUGGCUCUU
NC_045512.2	56	65	58	63	4.07	hsa-miR-433-3p_MIMAT0001627	10	21	14	19	1.93	-9.88	-15.88	-115898	CACCGAGGCC&GGCUCCUCGGUG	((((((((((&))..))))))))	CAAUCUUUAAUCAGUGUGUAACAUUAGGGAGGACUUGAAAGAGCCACCACAUUUUCACCGAGGCCACGCGGAGUACGAUCGAGUGUACAGUGAACAAUGCUAGGGAGAGCUGCCUAUAUGGAAGAGCCCUAAUGUGUAAAAUUAAUUUUAGUAGUGCUAUCCCCAUGUGAUUUUAAUAGCUUCUUAGGAGAAUGACAAAAAAAAAAAAAAAAAAAAAAAAAAAAAAAAA	AUCAUGAUGGGCUCCUCGGUGU
NC_045512.2	109	115	109	114	2.54	hsa-miR-4728-5p_MIMAT0019849	12	18	13	18	0.89	-9.87	-13.3	-11518	GCUGCCU&AGGCAGC	(((((((&)))))))	CAAUCUUUAAUCAGUGUGUAACAUUAGGGAGGACUUGAAAGAGCCACCACAUUUUCACCGAGGCCACGCGGAGUACGAUCGAGUGUACAGUGAACAAUGCUAGGGAGAGCUGCCUAUAUGGAAGAGCCCUAAUGUGUAAAAUUAAUUUUAGUAGUGCUAUCCCCAUGUGAUUUUAAUAGCUUCUUAGGAGAAUGACAAAAAAAAAAAAAAAAAAAAAAAAAAAAAAAAA	UGGGAGGGGAGAGGCAGCAAGCA
NC_045512.2	40	49	40	45	1.65	hsa-miR-493-5p_MIMAT0002813	8	18	13	18	0.57	-9.84	-12.06	-115428	AGAGCCACCA&UGGUAGGCUUU	((((((((((&)))).))))))	CAAUCUUUAAUCAGUGUGUAACAUUAGGGAGGACUUGAAAGAGCCACCACAUUUUCACCGAGGCCACGCGGAGUACGAUCGAGUGUACAGUGAACAAUGCUAGGGAGAGCUGCCUAUAUGGAAGAGCCCUAAUGUGUAAAAUUAAUUUUAGUAGUGCUAUCCCCAUGUGAUUUUAAUAGCUUCUUAGGAGAAUGACAAAAAAAAAAAAAAAAAAAAAAAAAAAAAAAAA	UUGUACAUGGUAGGCUUUCAUU
NC_045512.2	64	76	67	72	4.16	hsa-miR-509-3p_MIMAT0002881	7	19	12	17	1.2	-9.84	-15.2	-115428	CCACGCGGAGUAC&GUACGUCUGUGGG	((.((((((((((&)))).))))))))	CAAUCUUUAAUCAGUGUGUAACAUUAGGGAGGACUUGAAAGAGCCACCACAUUUUCACCGAGGCCACGCGGAGUACGAUCGAGUGUACAGUGAACAAUGCUAGGGAGAGCUGCCUAUAUGGAAGAGCCCUAAUGUGUAAAAUUAAUUUUAGUAGUGCUAUCCCCAUGUGAUUUUAAUAGCUUCUUAGGAGAAUGACAAAAAAAAAAAAAAAAAAAAAAAAAAAAAAAAA	UGAUUGGUACGUCUGUGGGUAG
NC_045512.2	61	87	80	85	7.35	hsa-miR-92a-3p_MIMAT0000092	4	20	6	11	0.46	-9.81	-17.62	-115076	AGGCCACGCGGAGUACGAUCGAGUGUA&UGCACUUGUCCCGGCCU	(((((....(((.......((((((((&))))))))))).)))))	CAAUCUUUAAUCAGUGUGUAACAUUAGGGAGGACUUGAAAGAGCCACCACAUUUUCACCGAGGCCACGCGGAGUACGAUCGAGUGUACAGUGAACAAUGCUAGGGAGAGCUGCCUAUAUGGAAGAGCCCUAAUGUGUAAAAUUAAUUUUAGUAGUGCUAUCCCCAUGUGAUUUUAAUAGCUUCUUAGGAGAAUGACAAAAAAAAAAAAAAAAAAAAAAAAAAAAAAAAA	UAUUGCACUUGUCCCGGCCUGU
NC_045512.2	27	33	27	32	3.88	hsa-miR-4687-5p_MIMAT0019774	7	13	8	13	0	-9.79	-13.67	-114842	GGGAGGA&UCCUCCC	(((((((&)))))))	CAAUCUUUAAUCAGUGUGUAACAUUAGGGAGGACUUGAAAGAGCCACCACAUUUUCACCGAGGCCACGCGGAGUACGAUCGAGUGUACAGUGAACAAUGCUAGGGAGAGCUGCCUAUAUGGAAGAGCCCUAAUGUGUAAAAUUAAUUUUAGUAGUGCUAUCCCCAUGUGAUUUUAAUAGCUUCUUAGGAGAAUGACAAAAAAAAAAAAAAAAAAAAAAAAAAAAAAAAA	CAGCCCUCCUCCCGCACCCAAA
NC_045512.2	109	116	109	114	3.87	hsa-miR-200b-5p_MIMAT0004571	9	16	11	16	0.7	-9.78	-14.35	-114725	GCUGCCUA&UGGGCAGC	((((((((&))))))))	CAAUCUUUAAUCAGUGUGUAACAUUAGGGAGGACUUGAAAGAGCCACCACAUUUUCACCGAGGCCACGCGGAGUACGAUCGAGUGUACAGUGAACAAUGCUAGGGAGAGCUGCCUAUAUGGAAGAGCCCUAAUGUGUAAAAUUAAUUUUAGUAGUGCUAUCCCCAUGUGAUUUUAAUAGCUUCUUAGGAGAAUGACAAAAAAAAAAAAAAAAAAAAAAAAAAAAAAAAA	CAUCUUACUGGGCAGCAUUGGA
NC_045512.2	159	183	178	183	6.41	hsa-miR-382-5p_MIMAT0000737	1	19	1	6	1.42	-9.78	-17.61	-114725	AUCCCCAUGUGAUUUUAAUAGCUUC&GAAGUUGUUCGUGGUGGAU	(((((((((.......(((((((((&)))))))))))))).))))	CAAUCUUUAAUCAGUGUGUAACAUUAGGGAGGACUUGAAAGAGCCACCACAUUUUCACCGAGGCCACGCGGAGUACGAUCGAGUGUACAGUGAACAAUGCUAGGGAGAGCUGCCUAUAUGGAAGAGCCCUAAUGUGUAAAAUUAAUUUUAGUAGUGCUAUCCCCAUGUGAUUUUAAUAGCUUCUUAGGAGAAUGACAAAAAAAAAAAAAAAAAAAAAAAAAAAAAAAAA	GAAGUUGUUCGUGGUGGAUUCG
NC_045512.2	173	189	183	188	4.21	hsa-miR-676-3p_MIMAT0018204	4	18	5	10	0.38	-9.76	-14.35	-115118	UUAAUAGCUUCUUAGGA&UCCUAAGGUUGUUGA	((((((((..(((((((&)))))))))))))))	CAAUCUUUAAUCAGUGUGUAACAUUAGGGAGGACUUGAAAGAGCCACCACAUUUUCACCGAGGCCACGCGGAGUACGAUCGAGUGUACAGUGAACAAUGCUAGGGAGAGCUGCCUAUAUGGAAGAGCCCUAAUGUGUAAAAUUAAUUUUAGUAGUGCUAUCCCCAUGUGAUUUUAAUAGCUUCUUAGGAGAAUGACAAAAAAAAAAAAAAAAAAAAAAAAAAAAAAAAA	CUGUCCUAAGGUUGUUGAGUU
NC_045512.2	161	170	164	169	2.96	hsa-miR-29b-2-5p_MIMAT0004515	7	17	8	13	1.79	-9.72	-14.47	-114021	CCCCAUGUGA&UCACAUGGUGG	((((((((((&)))))))).))	CAAUCUUUAAUCAGUGUGUAACAUUAGGGAGGACUUGAAAGAGCCACCACAUUUUCACCGAGGCCACGCGGAGUACGAUCGAGUGUACAGUGAACAAUGCUAGGGAGAGCUGCCUAUAUGGAAGAGCCCUAAUGUGUAAAAUUAAUUUUAGUAGUGCUAUCCCCAUGUGAUUUUAAUAGCUUCUUAGGAGAAUGACAAAAAAAAAAAAAAAAAAAAAAAAAAAAAAAAA	CUGGUUUCACAUGGUGGCUUAG
NC_045512.2	187	199	192	197	3.14	hsa-miR-211-5p_MIMAT0000268	6	18	8	13	0.06	-9.67	-12.87	-113434	GGAGAAUGACAAA&UUUGUCAUCCUUC	((((.((((((((&)))))))).))))	CAAUCUUUAAUCAGUGUGUAACAUUAGGGAGGACUUGAAAGAGCCACCACAUUUUCACCGAGGCCACGCGGAGUACGAUCGAGUGUACAGUGAACAAUGCUAGGGAGAGCUGCCUAUAUGGAAGAGCCCUAAUGUGUAAAAUUAAUUUUAGUAGUGCUAUCCCCAUGUGAUUUUAAUAGCUUCUUAGGAGAAUGACAAAAAAAAAAAAAAAAAAAAAAAAAAAAAAAAA	UUCCCUUUGUCAUCCUUCGCCU
NC_045512.2	149	157	151	156	2.36	hsa-miR-424-3p_MIMAT0004749	12	20	13	18	1.2	-9.67	-13.23	-114057	UAGUAGUGC&GCGCUGCUA	(((((((((&)))))))))	CAAUCUUUAAUCAGUGUGUAACAUUAGGGAGGACUUGAAAGAGCCACCACAUUUUCACCGAGGCCACGCGGAGUACGAUCGAGUGUACAGUGAACAAUGCUAGGGAGAGCUGCCUAUAUGGAAGAGCCCUAAUGUGUAAAAUUAAUUUUAGUAGUGCUAUCCCCAUGUGAUUUUAAUAGCUUCUUAGGAGAAUGACAAAAAAAAAAAAAAAAAAAAAAAAAAAAAAAAA	CAAAACGUGAGGCGCUGCUAU
NC_045512.2	104	110	105	110	4	hsa-miR-4709-5p_MIMAT0019811	14	20	14	19	0.4	-9.67	-14.07	-113434	GGAGAGC&GCUCUCC	(((((((&)))))))	CAAUCUUUAAUCAGUGUGUAACAUUAGGGAGGACUUGAAAGAGCCACCACAUUUUCACCGAGGCCACGCGGAGUACGAUCGAGUGUACAGUGAACAAUGCUAGGGAGAGCUGCCUAUAUGGAAGAGCCCUAAUGUGUAAAAUUAAUUUUAGUAGUGCUAUCCCCAUGUGAUUUUAAUAGCUUCUUAGGAGAAUGACAAAAAAAAAAAAAAAAAAAAAAAAAAAAAAAAA	ACAACAGUGACUUGCUCUCCAA
NC_045512.2	59	78	67	72	6.61	hsa-miR-99b-3p_MIMAT0004678	6	22	11	16	2.92	-9.66	-19.19	-113317	CGAGGCCACGCGGAGUACGA&UCGUGUCUGUGGGUCCG	((.((((.((((((..((((&)))).))))))))))))	CAAUCUUUAAUCAGUGUGUAACAUUAGGGAGGACUUGAAAGAGCCACCACAUUUUCACCGAGGCCACGCGGAGUACGAUCGAGUGUACAGUGAACAAUGCUAGGGAGAGCUGCCUAUAUGGAAGAGCCCUAAUGUGUAAAAUUAAUUUUAGUAGUGCUAUCCCCAUGUGAUUUUAAUAGCUUCUUAGGAGAAUGACAAAAAAAAAAAAAAAAAAAAAAAAAAAAAAAAA	CAAGCUCGUGUCUGUGGGUCCG
NC_045512.2	41	47	41	46	1.44	hsa-miR-597-3p_MIMAT0026619	11	17	12	17	2.09	-9.64	-13.17	-112496	GAGCCAC&GUGGCUC	(((((((&)))))))	CAAUCUUUAAUCAGUGUGUAACAUUAGGGAGGACUUGAAAGAGCCACCACAUUUUCACCGAGGCCACGCGGAGUACGAUCGAGUGUACAGUGAACAAUGCUAGGGAGAGCUGCCUAUAUGGAAGAGCCCUAAUGUGUAAAAUUAAUUUUAGUAGUGCUAUCCCCAUGUGAUUUUAAUAGCUUCUUAGGAGAAUGACAAAAAAAAAAAAAAAAAAAAAAAAAAAAAAAAA	UGGUUCUCUUGUGGCUCAAGCGU
NC_045512.2	48	59	50	55	2.35	hsa-miR-6758-5p_MIMAT0027416	8	19	12	17	0.03	-9.62	-12	-112262	CACAUUUUCACC&GGGAAGGAUGUG	((((((((..((&))..))))))))	CAAUCUUUAAUCAGUGUGUAACAUUAGGGAGGACUUGAAAGAGCCACCACAUUUUCACCGAGGCCACGCGGAGUACGAUCGAGUGUACAGUGAACAAUGCUAGGGAGAGCUGCCUAUAUGGAAGAGCCCUAAUGUGUAAAAUUAAUUUUAGUAGUGCUAUCCCCAUGUGAUUUUAAUAGCUUCUUAGGAGAAUGACAAAAAAAAAAAAAAAAAAAAAAAAAAAAAAAAA	UAGAGAGGGGAAGGAUGUGAUGU
NC_045512.2	31	46	31	36	4.25	hsa-miR-193b-3p_MIMAT0002819	4	18	13	18	1.25	-9.6	-15.1	-112613	GGACUUGAAAGAGCCA&UGGCCCUCAAAGUCC	((((((...((.((((&)))).))..))))))	CAAUCUUUAAUCAGUGUGUAACAUUAGGGAGGACUUGAAAGAGCCACCACAUUUUCACCGAGGCCACGCGGAGUACGAUCGAGUGUACAGUGAACAAUGCUAGGGAGAGCUGCCUAUAUGGAAGAGCCCUAAUGUGUAAAAUUAAUUUUAGUAGUGCUAUCCCCAUGUGAUUUUAAUAGCUUCUUAGGAGAAUGACAAAAAAAAAAAAAAAAAAAAAAAAAAAAAAAAA	AACUGGCCCUCAAAGUCCCGCU
NC_045512.2	187	198	193	198	3.12	hsa-miR-122b-3p_MIMAT0019877	9	20	9	14	0.23	-9.59	-12.94	-112496	GGAGAAUGACAA&UUGUCACACUCC	((((..((((((&))))))..))))	CAAUCUUUAAUCAGUGUGUAACAUUAGGGAGGACUUGAAAGAGCCACCACAUUUUCACCGAGGCCACGCGGAGUACGAUCGAGUGUACAGUGAACAAUGCUAGGGAGAGCUGCCUAUAUGGAAGAGCCCUAAUGUGUAAAAUUAAUUUUAGUAGUGCUAUCCCCAUGUGAUUUUAAUAGCUUCUUAGGAGAAUGACAAAAAAAAAAAAAAAAAAAAAAAAAAAAAAAAA	AAACACCAUUGUCACACUCCAC
NC_045512.2	106	127	106	111	8.67	hsa-miR-22-5p_MIMAT0004495	2	21	16	21	0.75	-9.57	-18.99	-112261	AGAGCUGCCUAUAUGGAAGAGC&GUUCUUCAGUGGCAAGCUUU	(((((((((......(((((((&)))))))...))).))))))	CAAUCUUUAAUCAGUGUGUAACAUUAGGGAGGACUUGAAAGAGCCACCACAUUUUCACCGAGGCCACGCGGAGUACGAUCGAGUGUACAGUGAACAAUGCUAGGGAGAGCUGCCUAUAUGGAAGAGCCCUAAUGUGUAAAAUUAAUUUUAGUAGUGCUAUCCCCAUGUGAUUUUAAUAGCUUCUUAGGAGAAUGACAAAAAAAAAAAAAAAAAAAAAAAAAAAAAAAAA	AGUUCUUCAGUGGCAAGCUUUA
NC_045512.2	112	131	126	131	6.09	hsa-miR-3180-3p_MIMAT0015058	1	21	1	6	4.93	-9.56	-20.58	-112144	GCCUAUAUGGAAGAGCCCUA&UGGGGCGGAGCUUCCGGAGGC	((((....(((((.((((((&))))))....)))))..))))	CAAUCUUUAAUCAGUGUGUAACAUUAGGGAGGACUUGAAAGAGCCACCACAUUUUCACCGAGGCCACGCGGAGUACGAUCGAGUGUACAGUGAACAAUGCUAGGGAGAGCUGCCUAUAUGGAAGAGCCCUAAUGUGUAAAAUUAAUUUUAGUAGUGCUAUCCCCAUGUGAUUUUAAUAGCUUCUUAGGAGAAUGACAAAAAAAAAAAAAAAAAAAAAAAAAAAAAAAAA	UGGGGCGGAGCUUCCGGAGGCC
NC_045512.2	150	165	153	158	3.22	hsa-miR-526b-5p_MIMAT0002835	5	21	12	17	2.71	-9.56	-15.49	-111562	AGUAGUGCUAUCCCCA&UGAGGGAAGCACUUUCU	((.((((((.((((((&)).))))))))))..))	CAAUCUUUAAUCAGUGUGUAACAUUAGGGAGGACUUGAAAGAGCCACCACAUUUUCACCGAGGCCACGCGGAGUACGAUCGAGUGUACAGUGAACAAUGCUAGGGAGAGCUGCCUAUAUGGAAGAGCCCUAAUGUGUAAAAUUAAUUUUAGUAGUGCUAUCCCCAUGUGAUUUUAAUAGCUUCUUAGGAGAAUGACAAAAAAAAAAAAAAAAAAAAAAAAAAAAAAAAA	CUCUUGAGGGAAGCACUUUCUGU
NC_045512.2	72	87	80	85	4.85	hsa-miR-25-3p_MIMAT0000081	4	20	6	11	0.45	-9.54	-14.84	-111909	AGUACGAUCGAGUGUA&UGCACUUGUCUCGGUCU	((..(((.((((((((&))))))))..)))..))	CAAUCUUUAAUCAGUGUGUAACAUUAGGGAGGACUUGAAAGAGCCACCACAUUUUCACCGAGGCCACGCGGAGUACGAUCGAGUGUACAGUGAACAAUGCUAGGGAGAGCUGCCUAUAUGGAAGAGCCCUAAUGUGUAAAAUUAAUUUUAGUAGUGCUAUCCCCAUGUGAUUUUAAUAGCUUCUUAGGAGAAUGACAAAAAAAAAAAAAAAAAAAAAAAAAAAAAAAAA	CAUUGCACUUGUCUCGGUCUGA
NC_045512.2	105	114	105	110	3.59	hsa-miR-381-3p_MIMAT0000736	9	19	14	19	2.82	-9.54	-15.95	-111909	GAGAGCUGCC&GGCAAGCUCUC	((((((((((&)))).))))))	CAAUCUUUAAUCAGUGUGUAACAUUAGGGAGGACUUGAAAGAGCCACCACAUUUUCACCGAGGCCACGCGGAGUACGAUCGAGUGUACAGUGAACAAUGCUAGGGAGAGCUGCCUAUAUGGAAGAGCCCUAAUGUGUAAAAUUAAUUUUAGUAGUGCUAUCCCCAUGUGAUUUUAAUAGCUUCUUAGGAGAAUGACAAAAAAAAAAAAAAAAAAAAAAAAAAAAAAAAA	UAUACAAGGGCAAGCUCUCUGU
NC_045512.2	153	163	153	158	3	hsa-miR-520b-5p_MIMAT0037325	9	18	13	18	1.92	-9.48	-14.4	-111816	AGUGCUAUCCC&GGGAAGCGCU	((((((.((((&))))))))))	CAAUCUUUAAUCAGUGUGUAACAUUAGGGAGGACUUGAAAGAGCCACCACAUUUUCACCGAGGCCACGCGGAGUACGAUCGAGUGUACAGUGAACAAUGCUAGGGAGAGCUGCCUAUAUGGAAGAGCCCUAAUGUGUAAAAUUAAUUUUAGUAGUGCUAUCCCCAUGUGAUUUUAAUAGCUUCUUAGGAGAAUGACAAAAAAAAAAAAAAAAAAAAAAAAAAAAAAAAA	CCUCUACAGGGAAGCGCUUUC
NC_045512.2	153	163	153	158	3	hsa-miR-519a-2-5p_MIMAT0037327	9	18	13	18	1.92	-9.48	-14.4	-111816	AGUGCUAUCCC&GGGAAGCGCU	((((((.((((&))))))))))	CAAUCUUUAAUCAGUGUGUAACAUUAGGGAGGACUUGAAAGAGCCACCACAUUUUCACCGAGGCCACGCGGAGUACGAUCGAGUGUACAGUGAACAAUGCUAGGGAGAGCUGCCUAUAUGGAAGAGCCCUAAUGUGUAAAAUUAAUUUUAGUAGUGCUAUCCCCAUGUGAUUUUAAUAGCUUCUUAGGAGAAUGACAAAAAAAAAAAAAAAAAAAAAAAAAAAAAAAAA	CCUCUACAGGGAAGCGCUUUC
NC_045512.2	144	160	154	159	2.87	hsa-miR-652-3p_MIMAT0003322	2	18	3	8	3.74	-9.38	-15.99	-110636	AAUUUUAGUAGUGCUAU&AUGGCGCCACUAGGGUU	(((((((((.(((((((&))))))).)))))))))	CAAUCUUUAAUCAGUGUGUAACAUUAGGGAGGACUUGAAAGAGCCACCACAUUUUCACCGAGGCCACGCGGAGUACGAUCGAGUGUACAGUGAACAAUGCUAGGGAGAGCUGCCUAUAUGGAAGAGCCCUAAUGUGUAAAAUUAAUUUUAGUAGUGCUAUCCCCAUGUGAUUUUAAUAGCUUCUUAGGAGAAUGACAAAAAAAAAAAAAAAAAAAAAAAAAAAAAAAAA	AAUGGCGCCACUAGGGUUGUG
NC_045512.2	30	46	40	45	4.69	hsa-miR-135a-5p_MIMAT0000428	3	17	4	9	0.54	-9.35	-14.58	-109111	AGGACUUGAAAGAGCCA&UGGCUUUUUAUUCCU	((((....(((((((((&)))))))))..))))	CAAUCUUUAAUCAGUGUGUAACAUUAGGGAGGACUUGAAAGAGCCACCACAUUUUCACCGAGGCCACGCGGAGUACGAUCGAGUGUACAGUGAACAAUGCUAGGGAGAGCUGCCUAUAUGGAAGAGCCCUAAUGUGUAAAAUUAAUUUUAGUAGUGCUAUCCCCAUGUGAUUUUAAUAGCUUCUUAGGAGAAUGACAAAAAAAAAAAAAAAAAAAAAAAAAAAAAAAAA	UAUGGCUUUUUAUUCCUAUGUGA
NC_045512.2	119	127	120	125	3.38	hsa-miR-6514-3p_MIMAT0025485	7	15	9	14	0.29	-9.34	-13.01	-110164	UGGAAGAGC&GUUCUUCCA	(((((((((&)))))))))	CAAUCUUUAAUCAGUGUGUAACAUUAGGGAGGACUUGAAAGAGCCACCACAUUUUCACCGAGGCCACGCGGAGUACGAUCGAGUGUACAGUGAACAAUGCUAGGGAGAGCUGCCUAUAUGGAAGAGCCCUAAUGUGUAAAAUUAAUUUUAGUAGUGCUAUCCCCAUGUGAUUUUAAUAGCUUCUUAGGAGAAUGACAAAAAAAAAAAAAAAAAAAAAAAAAAAAAAAAA	CUGCCUGUUCUUCCACUCCAG
NC_045512.2	109	115	109	114	2.54	hsa-miR-885-3p_MIMAT0004948	1	7	2	7	1.29	-9.34	-13.17	-109563	GCUGCCU&AGGCAGC	(((((((&)))))))	CAAUCUUUAAUCAGUGUGUAACAUUAGGGAGGACUUGAAAGAGCCACCACAUUUUCACCGAGGCCACGCGGAGUACGAUCGAGUGUACAGUGAACAAUGCUAGGGAGAGCUGCCUAUAUGGAAGAGCCCUAAUGUGUAAAAUUAAUUUUAGUAGUGCUAUCCCCAUGUGAUUUUAAUAGCUUCUUAGGAGAAUGACAAAAAAAAAAAAAAAAAAAAAAAAAAAAAAAAA	AGGCAGCGGGGUGUAGUGGAUA
NC_045512.2	127	137	132	137	2.48	hsa-miR-642a-3p_MIMAT0020924	3	18	3	8	0.28	-9.27	-12.03	-108742	CCCUAAUGUGU&ACACAUUUGGAGAGGG	(((((((((((&))))))).....))))	CAAUCUUUAAUCAGUGUGUAACAUUAGGGAGGACUUGAAAGAGCCACCACAUUUUCACCGAGGCCACGCGGAGUACGAUCGAGUGUACAGUGAACAAUGCUAGGGAGAGCUGCCUAUAUGGAAGAGCCCUAAUGUGUAAAAUUAAUUUUAGUAGUGCUAUCCCCAUGUGAUUUUAAUAGCUUCUUAGGAGAAUGACAAAAAAAAAAAAAAAAAAAAAAAAAAAAAAAAA	AGACACAUUUGGAGAGGGAACC
NC_045512.2	28	45	40	45	5.9	hsa-miR-671-3p_MIMAT0004819	4	18	4	9	2.48	-9.22	-17.6	-108749	GGAGGACUUGAAAGAGCC&GGUUCUCAGGGCUCC	((((..((((..((((((&)))))))))).))))	CAAUCUUUAAUCAGUGUGUAACAUUAGGGAGGACUUGAAAGAGCCACCACAUUUUCACCGAGGCCACGCGGAGUACGAUCGAGUGUACAGUGAACAAUGCUAGGGAGAGCUGCCUAUAUGGAAGAGCCCUAAUGUGUAAAAUUAAUUUUAGUAGUGCUAUCCCCAUGUGAUUUUAAUAGCUUCUUAGGAGAAUGACAAAAAAAAAAAAAAAAAAAAAAAAAAAAAAAAA	UCCGGUUCUCAGGGCUCCACC
NC_045512.2	2	19	14	19	2.58	hsa-miR-362-3p_MIMAT0004683	2	20	2	7	1.42	-9.19	-13.19	-107804	AAUCUUUAAUCAGUGUGU&ACACACCUAUUCAAGGAUU	((((((((((..((((((&))))))..))).)))))))	CAAUCUUUAAUCAGUGUGUAACAUUAGGGAGGACUUGAAAGAGCCACCACAUUUUCACCGAGGCCACGCGGAGUACGAUCGAGUGUACAGUGAACAAUGCUAGGGAGAGCUGCCUAUAUGGAAGAGCCCUAAUGUGUAAAAUUAAUUUUAGUAGUGCUAUCCCCAUGUGAUUUUAAUAGCUUCUUAGGAGAAUGACAAAAAAAAAAAAAAAAAAAAAAAAAAAAAAAAA	AACACACCUAUUCAAGGAUUCA
NC_045512.2	22	32	27	32	4.31	hsa-miR-4728-3p_MIMAT0019850	9	19	9	14	0.62	-9.15	-14.08	-105749	CAUUAGGGAGG&CCUCCCUCCUG	((..(((((((&)))))))..))	CAAUCUUUAAUCAGUGUGUAACAUUAGGGAGGACUUGAAAGAGCCACCACAUUUUCACCGAGGCCACGCGGAGUACGAUCGAGUGUACAGUGAACAAUGCUAGGGAGAGCUGCCUAUAUGGAAGAGCCCUAAUGUGUAAAAUUAAUUUUAGUAGUGCUAUCCCCAUGUGAUUUUAAUAGCUUCUUAGGAGAAUGACAAAAAAAAAAAAAAAAAAAAAAAAAAAAAAAAA	CAUGCUGACCUCCCUCCUGCCCCAG
NC_045512.2	30	46	32	37	4.69	hsa-miR-5001-3p_MIMAT0021022	4	21	14	19	2.82	-9.14	-16.65	-107217	AGGACUUGAAAGAGCCA&UGCCUCUGUCCAGGUCCU	((((((((..((((.((&)).))))...))))))))	CAAUCUUUAAUCAGUGUGUAACAUUAGGGAGGACUUGAAAGAGCCACCACAUUUUCACCGAGGCCACGCGGAGUACGAUCGAGUGUACAGUGAACAAUGCUAGGGAGAGCUGCCUAUAUGGAAGAGCCCUAAUGUGUAAAAUUAAUUUUAGUAGUGCUAUCCCCAUGUGAUUUUAAUAGCUUCUUAGGAGAAUGACAAAAAAAAAAAAAAAAAAAAAAAAAAAAAAAAA	UUCUGCCUCUGUCCAGGUCCUU
NC_045512.2	150	157	152	157	2.31	hsa-miR-301b-5p_MIMAT0032026	15	22	15	20	0.52	-9.12	-11.95	-106982	AGUAGUGC&GCACUACU	((((((((&))))))))	CAAUCUUUAAUCAGUGUGUAACAUUAGGGAGGACUUGAAAGAGCCACCACAUUUUCACCGAGGCCACGCGGAGUACGAUCGAGUGUACAGUGAACAAUGCUAGGGAGAGCUGCCUAUAUGGAAGAGCCCUAAUGUGUAAAAUUAAUUUUAGUAGUGCUAUCCCCAUGUGAUUUUAAUAGCUUCUUAGGAGAAUGACAAAAAAAAAAAAAAAAAAAAAAAAAAAAAAAAA	GCUCUGACGAGGUUGCACUACU
NC_045512.2	81	88	83	88	2.77	hsa-miR-3616-5p_MIMAT0017995	6	13	6	11	0.98	-9.11	-12.86	-106865	GAGUGUAC&GUGCACUC	((((((((&))))))))	CAAUCUUUAAUCAGUGUGUAACAUUAGGGAGGACUUGAAAGAGCCACCACAUUUUCACCGAGGCCACGCGGAGUACGAUCGAGUGUACAGUGAACAAUGCUAGGGAGAGCUGCCUAUAUGGAAGAGCCCUAAUGUGUAAAAUUAAUUUUAGUAGUGCUAUCCCCAUGUGAUUUUAAUAGCUUCUUAGGAGAAUGACAAAAAAAAAAAAAAAAAAAAAAAAAAAAAAAAA	AUGAAGUGCACUCAUGAUAUGU
NC_045512.2	127	137	132	137	2.48	hsa-miR-642b-3p_MIMAT0018444	3	18	3	8	0.44	-9.11	-12.03	-106865	CCCUAAUGUGU&ACACAUUUGGAGAGGG	(((((((((((&))))))).....))))	CAAUCUUUAAUCAGUGUGUAACAUUAGGGAGGACUUGAAAGAGCCACCACAUUUUCACCGAGGCCACGCGGAGUACGAUCGAGUGUACAGUGAACAAUGCUAGGGAGAGCUGCCUAUAUGGAAGAGCCCUAAUGUGUAAAAUUAAUUUUAGUAGUGCUAUCCCCAUGUGAUUUUAAUAGCUUCUUAGGAGAAUGACAAAAAAAAAAAAAAAAAAAAAAAAAAAAAAAAA	AGACACAUUUGGAGAGGGACCC
NC_045512.2	149	165	159	164	3.25	hsa-miR-6842-5p_MIMAT0027586	1	15	2	7	4.37	-9.11	-16.73	-106865	UAGUAGUGCUAUCCCCA&UGGGGGUGGUCUCUA	(((.((..(((((((((&))))))))).)))))	CAAUCUUUAAUCAGUGUGUAACAUUAGGGAGGACUUGAAAGAGCCACCACAUUUUCACCGAGGCCACGCGGAGUACGAUCGAGUGUACAGUGAACAAUGCUAGGGAGAGCUGCCUAUAUGGAAGAGCCCUAAUGUGUAAAAUUAAUUUUAGUAGUGCUAUCCCCAUGUGAUUUUAAUAGCUUCUUAGGAGAAUGACAAAAAAAAAAAAAAAAAAAAAAAAAAAAAAAAA	UGGGGGUGGUCUCUAGCCAAGG
NC_045512.2	21	46	40	45	6.43	hsa-miR-135b-5p_MIMAT0000758	3	21	4	9	1.53	-9.08	-17.04	-105961	ACAUUAGGGAGGACUUGAAAGAGCCA&UGGCUUUUCAUUCCUAUGU	((((.(((((.....(((.(((((((&)))))))))))))))))))	CAAUCUUUAAUCAGUGUGUAACAUUAGGGAGGACUUGAAAGAGCCACCACAUUUUCACCGAGGCCACGCGGAGUACGAUCGAGUGUACAGUGAACAAUGCUAGGGAGAGCUGCCUAUAUGGAAGAGCCCUAAUGUGUAAAAUUAAUUUUAGUAGUGCUAUCCCCAUGUGAUUUUAAUAGCUUCUUAGGAGAAUGACAAAAAAAAAAAAAAAAAAAAAAAAAAAAAAAAA	UAUGGCUUUUCAUUCCUAUGUGA
NC_045512.2	12	29	13	18	4.29	hsa-miR-210-5p_MIMAT0026475	4	22	16	21	1.43	-9.07	-14.79	-106396	CAGUGUGUAACAUUAGGG&CCCUGCCCACCGCACACUG	(((((((.......((((&))))........)))))))	CAAUCUUUAAUCAGUGUGUAACAUUAGGGAGGACUUGAAAGAGCCACCACAUUUUCACCGAGGCCACGCGGAGUACGAUCGAGUGUACAGUGAACAAUGCUAGGGAGAGCUGCCUAUAUGGAAGAGCCCUAAUGUGUAAAAUUAAUUUUAGUAGUGCUAUCCCCAUGUGAUUUUAAUAGCUUCUUAGGAGAAUGACAAAAAAAAAAAAAAAAAAAAAAAAAAAAAAAAA	AGCCCCUGCCCACCGCACACUG
NC_045512.2	153	170	153	158	4.64	hsa-miR-200b-5p_MIMAT0004571	5	19	14	19	0.77	-9.04	-14.45	-106044	AGUGCUAUCCCCAUGUGA&UUACUGGGCAGCAUU	((((((...((((.((((&)))))))).))))))	CAAUCUUUAAUCAGUGUGUAACAUUAGGGAGGACUUGAAAGAGCCACCACAUUUUCACCGAGGCCACGCGGAGUACGAUCGAGUGUACAGUGAACAAUGCUAGGGAGAGCUGCCUAUAUGGAAGAGCCCUAAUGUGUAAAAUUAAUUUUAGUAGUGCUAUCCCCAUGUGAUUUUAAUAGCUUCUUAGGAGAAUGACAAAAAAAAAAAAAAAAAAAAAAAAAAAAAAAAA	CAUCUUACUGGGCAGCAUUGGA
NC_045512.2	118	132	126	131	3.83	hsa-miR-1296-5p_MIMAT0005794	1	18	2	7	3.75	-9.02	-16.6	-105809	AUGGAAGAGCCCUAA&UUAGGGCCCUGGCUCCAU	(((((((.(((((((&))))))).))...)))))	CAAUCUUUAAUCAGUGUGUAACAUUAGGGAGGACUUGAAAGAGCCACCACAUUUUCACCGAGGCCACGCGGAGUACGAUCGAGUGUACAGUGAACAAUGCUAGGGAGAGCUGCCUAUAUGGAAGAGCCCUAAUGUGUAAAAUUAAUUUUAGUAGUGCUAUCCCCAUGUGAUUUUAAUAGCUUCUUAGGAGAAUGACAAAAAAAAAAAAAAAAAAAAAAAAAAAAAAAAA	UUAGGGCCCUGGCUCCAUCUCC
NC_045512.2	99	112	99	104	5.69	hsa-miR-2277-3p_MIMAT0011777	4	19	14	19	4.02	-9	-18.71	-106154	GCUAGGGAGAGCUG&CAGCGCCCUGCCUGGC	((((((.((.((((&))))...)).))))))	CAAUCUUUAAUCAGUGUGUAACAUUAGGGAGGACUUGAAAGAGCCACCACAUUUUCACCGAGGCCACGCGGAGUACGAUCGAGUGUACAGUGAACAAUGCUAGGGAGAGCUGCCUAUAUGGAAGAGCCCUAAUGUGUAAAAUUAAUUUUAGUAGUGCUAUCCCCAUGUGAUUUUAAUAGCUUCUUAGGAGAAUGACAAAAAAAAAAAAAAAAAAAAAAAAAAAAAAAAA	UGACAGCGCCCUGCCUGGCUC
NC_045512.2	41	46	41	46	1.23	hsa-miR-24-3p_MIMAT0000080	1	6	1	6	0.14	-8.97	-10.34	-105223	GAGCCA&UGGCUC	((((((&))))))	CAAUCUUUAAUCAGUGUGUAACAUUAGGGAGGACUUGAAAGAGCCACCACAUUUUCACCGAGGCCACGCGGAGUACGAUCGAGUGUACAGUGAACAAUGCUAGGGAGAGCUGCCUAUAUGGAAGAGCCCUAAUGUGUAAAAUUAAUUUUAGUAGUGCUAUCCCCAUGUGAUUUUAAUAGCUUCUUAGGAGAAUGACAAAAAAAAAAAAAAAAAAAAAAAAAAAAAAAAA	UGGCUCAGUUCAGCAGGAACAG
NC_045512.2	126	135	130	135	2.48	hsa-miR-421_MIMAT0003339	9	21	9	14	0.35	-8.96	-11.79	-10456	GCCCUAAUGU&ACAUUAAUUGGGC	((((((((((&))))))...))))	CAAUCUUUAAUCAGUGUGUAACAUUAGGGAGGACUUGAAAGAGCCACCACAUUUUCACCGAGGCCACGCGGAGUACGAUCGAGUGUACAGUGAACAAUGCUAGGGAGAGCUGCCUAUAUGGAAGAGCCCUAAUGUGUAAAAUUAAUUUUAGUAGUGCUAUCCCCAUGUGAUUUUAAUAGCUUCUUAGGAGAAUGACAAAAAAAAAAAAAAAAAAAAAAAAAAAAAAAAA	AUCAACAGACAUUAAUUGGGCGC
NC_045512.2	40	67	40	45	7.63	hsa-miR-3940-5p_MIMAT0019229	1	19	14	19	3.64	-8.96	-20.23	-106294	AGAGCCACCACAUUUUCACCGAGGCCAC&GUGGGUUGGGGCGGGCUCU	((((((.((.........((((..((((&)))).))))))..))))))	CAAUCUUUAAUCAGUGUGUAACAUUAGGGAGGACUUGAAAGAGCCACCACAUUUUCACCGAGGCCACGCGGAGUACGAUCGAGUGUACAGUGAACAAUGCUAGGGAGAGCUGCCUAUAUGGAAGAGCCCUAAUGUGUAAAAUUAAUUUUAGUAGUGCUAUCCCCAUGUGAUUUUAAUAGCUUCUUAGGAGAAUGACAAAAAAAAAAAAAAAAAAAAAAAAAAAAAAAAA	GUGGGUUGGGGCGGGCUCUG
NC_045512.2	55	67	62	67	4.73	hsa-miR-216a-3p_MIMAT0022844	6	18	6	11	3.38	-8.93	-17.04	-104754	UCACCGAGGCCAC&GUGGUCUCUGGGA	((.((((((((((&)))))))).))))	CAAUCUUUAAUCAGUGUGUAACAUUAGGGAGGACUUGAAAGAGCCACCACAUUUUCACCGAGGCCACGCGGAGUACGAUCGAGUGUACAGUGAACAAUGCUAGGGAGAGCUGCCUAUAUGGAAGAGCCCUAAUGUGUAAAAUUAAUUUUAGUAGUGCUAUCCCCAUGUGAUUUUAAUAGCUUCUUAGGAGAAUGACAAAAAAAAAAAAAAAAAAAAAAAAAAAAAAAAA	UCACAGUGGUCUCUGGGAUUAU
NC_045512.2	54	66	54	59	4.45	hsa-miR-377-5p_MIMAT0004689	7	19	14	19	3.22	-8.91	-16.58	-104519	UUCACCGAGGCCA&UGCCCUUGGUGAA	((((((((((.((&)).))))))))))	CAAUCUUUAAUCAGUGUGUAACAUUAGGGAGGACUUGAAAGAGCCACCACAUUUUCACCGAGGCCACGCGGAGUACGAUCGAGUGUACAGUGAACAAUGCUAGGGAGAGCUGCCUAUAUGGAAGAGCCCUAAUGUGUAAAAUUAAUUUUAGUAGUGCUAUCCCCAUGUGAUUUUAAUAGCUUCUUAGGAGAAUGACAAAAAAAAAAAAAAAAAAAAAAAAAAAAAAAAA	AGAGGUUGCCCUUGGUGAAUUC
NC_045512.2	5	22	9	14	2.49	hsa-miR-5586-3p_MIMAT0022288	5	22	13	18	1.48	-8.91	-12.88	-104519	CUUUAAUCAGUGUGUAAC&GUGACAAGCUGGUUAAAG	((((((((((..((..((&))..))..))))))))))	CAAUCUUUAAUCAGUGUGUAACAUUAGGGAGGACUUGAAAGAGCCACCACAUUUUCACCGAGGCCACGCGGAGUACGAUCGAGUGUACAGUGAACAAUGCUAGGGAGAGCUGCCUAUAUGGAAGAGCCCUAAUGUGUAAAAUUAAUUUUAGUAGUGCUAUCCCCAUGUGAUUUUAAUAGCUUCUUAGGAGAAUGACAAAAAAAAAAAAAAAAAAAAAAAAAAAAAAAAA	CAGAGUGACAAGCUGGUUAAAG
NC_045512.2	154	167	161	166	3.88	hsa-miR-3187-3p_MIMAT0015069	6	18	7	12	5.21	-8.84	-17.93	-10487	GUGCUAUCCCCAUG&CAUGGGGCUGCGC	((((...(((((((&)))))))..))))	CAAUCUUUAAUCAGUGUGUAACAUUAGGGAGGACUUGAAAGAGCCACCACAUUUUCACCGAGGCCACGCGGAGUACGAUCGAGUGUACAGUGAACAAUGCUAGGGAGAGCUGCCUAUAUGGAAGAGCCCUAAUGUGUAAAAUUAAUUUUAGUAGUGCUAUCCCCAUGUGAUUUUAAUAGCUUCUUAGGAGAAUGACAAAAAAAAAAAAAAAAAAAAAAAAAAAAAAAAA	UUGGCCAUGGGGCUGCGCGG
NC_045512.2	121	129	124	129	3.35	hsa-miR-433-3p_MIMAT0001627	9	17	9	14	1.88	-8.84	-14.07	-103698	GAAGAGCCC&GGGCUCCUC	((.((((((&)))))).))	CAAUCUUUAAUCAGUGUGUAACAUUAGGGAGGACUUGAAAGAGCCACCACAUUUUCACCGAGGCCACGCGGAGUACGAUCGAGUGUACAGUGAACAAUGCUAGGGAGAGCUGCCUAUAUGGAAGAGCCCUAAUGUGUAAAAUUAAUUUUAGUAGUGCUAUCCCCAUGUGAUUUUAAUAGCUUCUUAGGAGAAUGACAAAAAAAAAAAAAAAAAAAAAAAAAAAAAAAAA	AUCAUGAUGGGCUCCUCGGUGU
NC_045512.2	153	165	160	165	3.07	hsa-miR-450a-2-3p_MIMAT0031074	3	19	3	8	0.89	-8.84	-12.8	-103698	AGUGCUAUCCCCA&UGGGGACAUUUUGCAUU	(((((..((((((&))))))......)))))	CAAUCUUUAAUCAGUGUGUAACAUUAGGGAGGACUUGAAAGAGCCACCACAUUUUCACCGAGGCCACGCGGAGUACGAUCGAGUGUACAGUGAACAAUGCUAGGGAGAGCUGCCUAUAUGGAAGAGCCCUAAUGUGUAAAAUUAAUUUUAGUAGUGCUAUCCCCAUGUGAUUUUAAUAGCUUCUUAGGAGAAUGACAAAAAAAAAAAAAAAAAAAAAAAAAAAAAAAAA	AUUGGGGACAUUUUGCAUUCAU
NC_045512.2	41	47	41	46	1.44	hsa-miR-224-5p_MIMAT0000281	12	18	13	18	0.41	-8.81	-10.66	-101819	GAGCCAC&GUGGUUC	(((((((&)))))))	CAAUCUUUAAUCAGUGUGUAACAUUAGGGAGGACUUGAAAGAGCCACCACAUUUUCACCGAGGCCACGCGGAGUACGAUCGAGUGUACAGUGAACAAUGCUAGGGAGAGCUGCCUAUAUGGAAGAGCCCUAAUGUGUAAAAUUAAUUUUAGUAGUGCUAUCCCCAUGUGAUUUUAAUAGCUUCUUAGGAGAAUGACAAAAAAAAAAAAAAAAAAAAAAAAAAAAAAAAA	UCAAGUCACUAGUGGUUCCGUUUAG
NC_045512.2	41	50	45	50	2.86	hsa-miR-323b-5p_MIMAT0001630	10	20	10	15	2.38	-8.81	-14.05	-10281	GAGCCACCAC&GUGGUGAGUUC	((((((((((&)))))).))))	CAAUCUUUAAUCAGUGUGUAACAUUAGGGAGGACUUGAAAGAGCCACCACAUUUUCACCGAGGCCACGCGGAGUACGAUCGAGUGUACAGUGAACAAUGCUAGGGAGAGCUGCCUAUAUGGAAGAGCCCUAAUGUGUAAAAUUAAUUUUAGUAGUGCUAUCCCCAUGUGAUUUUAAUAGCUUCUUAGGAGAAUGACAAAAAAAAAAAAAAAAAAAAAAAAAAAAAAAAA	AGGUUGUCCGUGGUGAGUUCGCA
NC_045512.2	120	130	124	129	3.48	hsa-miR-671-3p_MIMAT0004819	11	21	12	17	2.45	-8.81	-14.74	-103913	GGAAGAGCCCU&AGGGCUCCACC	((..(((((((&)))))))..))	CAAUCUUUAAUCAGUGUGUAACAUUAGGGAGGACUUGAAAGAGCCACCACAUUUUCACCGAGGCCACGCGGAGUACGAUCGAGUGUACAGUGAACAAUGCUAGGGAGAGCUGCCUAUAUGGAAGAGCCCUAAUGUGUAAAAUUAAUUUUAGUAGUGCUAUCCCCAUGUGAUUUUAAUAGCUUCUUAGGAGAAUGACAAAAAAAAAAAAAAAAAAAAAAAAAAAAAAAAA	UCCGGUUCUCAGGGCUCCACC
NC_045512.2	27	32	27	32	3.52	hsa-miR-2116-3p_MIMAT0011161	1	6	1	6	0.04	-8.8	-12.36	-103795	GGGAGG&CCUCCC	((((((&))))))	CAAUCUUUAAUCAGUGUGUAACAUUAGGGAGGACUUGAAAGAGCCACCACAUUUUCACCGAGGCCACGCGGAGUACGAUCGAGUGUACAGUGAACAAUGCUAGGGAGAGCUGCCUAUAUGGAAGAGCCCUAAUGUGUAAAAUUAAUUUUAGUAGUGCUAUCCCCAUGUGAUUUUAAUAGCUUCUUAGGAGAAUGACAAAAAAAAAAAAAAAAAAAAAAAAAAAAAAAAA	CCUCCCAUGCCAAGAACUCCC
NC_045512.2	150	157	152	157	2.31	hsa-miR-3200-3p_MIMAT0015085	7	14	7	12	0.72	-8.78	-11.81	-102994	AGUAGUGC&GCGCUACU	((((((((&))))))))	CAAUCUUUAAUCAGUGUGUAACAUUAGGGAGGACUUGAAAGAGCCACCACAUUUUCACCGAGGCCACGCGGAGUACGAUCGAGUGUACAGUGAACAAUGCUAGGGAGAGCUGCCUAUAUGGAAGAGCCCUAAUGUGUAAAAUUAAUUUUAGUAGUGCUAUCCCCAUGUGAUUUUAAUAGCUUCUUAGGAGAAUGACAAAAAAAAAAAAAAAAAAAAAAAAAAAAAAAAA	CACCUUGCGCUACUCAGGUCUG
NC_045512.2	125	137	125	130	2.55	hsa-miR-138-2-3p_MIMAT0004596	12	22	17	22	0.38	-8.75	-11.68	-102642	AGCCCUAAUGUGU&ACACCAGGGUU	((((((...((((&)))).))))))	CAAUCUUUAAUCAGUGUGUAACAUUAGGGAGGACUUGAAAGAGCCACCACAUUUUCACCGAGGCCACGCGGAGUACGAUCGAGUGUACAGUGAACAAUGCUAGGGAGAGCUGCCUAUAUGGAAGAGCCCUAAUGUGUAAAAUUAAUUUUAGUAGUGCUAUCCCCAUGUGAUUUUAAUAGCUUCUUAGGAGAAUGACAAAAAAAAAAAAAAAAAAAAAAAAAAAAAAAAA	GCUAUUUCACGACACCAGGGUU
NC_045512.2	157	170	164	169	4.48	hsa-miR-29b-1-5p_MIMAT0004514	8	23	9	14	1.58	-8.73	-14.79	-101373	CUAUCCCCAUGUGA&UCAUAUGGUGGUUUAG	(((.((((((((((&)))))))).))..)))	CAAUCUUUAAUCAGUGUGUAACAUUAGGGAGGACUUGAAAGAGCCACCACAUUUUCACCGAGGCCACGCGGAGUACGAUCGAGUGUACAGUGAACAAUGCUAGGGAGAGCUGCCUAUAUGGAAGAGCCCUAAUGUGUAAAAUUAAUUUUAGUAGUGCUAUCCCCAUGUGAUUUUAAUAGCUUCUUAGGAGAAUGACAAAAAAAAAAAAAAAAAAAAAAAAAAAAAAAAA	GCUGGUUUCAUAUGGUGGUUUAGA
NC_045512.2	28	49	44	49	6.35	hsa-miR-876-3p_MIMAT0004925	1	21	1	6	1.67	-8.73	-16.75	-102408	GGAGGACUUGAAAGAGCCACCA&UGGUGGUUUACAAAGUAAUUC	(((..((((.....((((((((&))))))))....))))..)))	CAAUCUUUAAUCAGUGUGUAACAUUAGGGAGGACUUGAAAGAGCCACCACAUUUUCACCGAGGCCACGCGGAGUACGAUCGAGUGUACAGUGAACAAUGCUAGGGAGAGCUGCCUAUAUGGAAGAGCCCUAAUGUGUAAAAUUAAUUUUAGUAGUGCUAUCCCCAUGUGAUUUUAAUAGCUUCUUAGGAGAAUGACAAAAAAAAAAAAAAAAAAAAAAAAAAAAAAAAA	UGGUGGUUUACAAAGUAAUUCA
NC_045512.2	40	45	40	45	1.32	hsa-miR-4755-3p_MIMAT0019896	6	11	6	11	1.08	-8.7	-11.1	-102056	AGAGCC&GGCUCU	((((((&))))))	CAAUCUUUAAUCAGUGUGUAACAUUAGGGAGGACUUGAAAGAGCCACCACAUUUUCACCGAGGCCACGCGGAGUACGAUCGAGUGUACAGUGAACAAUGCUAGGGAGAGCUGCCUAUAUGGAAGAGCCCUAAUGUGUAAAAUUAAUUUUAGUAGUGCUAUCCCCAUGUGAUUUUAAUAGCUUCUUAGGAGAAUGACAAAAAAAAAAAAAAAAAAAAAAAAAAAAAAAAA	AGCCAGGCUCUGAAGGGAAAGU
NC_045512.2	150	157	152	157	2.31	hsa-miR-301a-5p_MIMAT0022696	15	22	15	20	0.95	-8.69	-11.95	-101938	AGUAGUGC&GCACUACU	((((((((&))))))))	CAAUCUUUAAUCAGUGUGUAACAUUAGGGAGGACUUGAAAGAGCCACCACAUUUUCACCGAGGCCACGCGGAGUACGAUCGAGUGUACAGUGAACAAUGCUAGGGAGAGCUGCCUAUAUGGAAGAGCCCUAAUGUGUAAAAUUAAUUUUAGUAGUGCUAUCCCCAUGUGAUUUUAAUAGCUUCUUAGGAGAAUGACAAAAAAAAAAAAAAAAAAAAAAAAAAAAAAAAA	GCUCUGACUUUAUUGCACUACU
NC_045512.2	27	32	27	32	3.52	hsa-miR-3622a-3p_MIMAT0018004	9	14	9	14	0.13	-8.67	-12.32	-101704	GGGAGG&CCUCCC	((((((&))))))	CAAUCUUUAAUCAGUGUGUAACAUUAGGGAGGACUUGAAAGAGCCACCACAUUUUCACCGAGGCCACGCGGAGUACGAUCGAGUGUACAGUGAACAAUGCUAGGGAGAGCUGCCUAUAUGGAAGAGCCCUAAUGUGUAAAAUUAAUUUUAGUAGUGCUAUCCCCAUGUGAUUUUAAUAGCUUCUUAGGAGAAUGACAAAAAAAAAAAAAAAAAAAAAAAAAAAAAAAAA	UCACCUGACCUCCCAUGCCUGU
NC_045512.2	119	126	119	124	3.35	hsa-miR-6505-3p_MIMAT0025467	11	18	13	18	0.06	-8.67	-12.08	-102262	UGGAAGAG&CUCUUCCA	((((((((&))))))))	CAAUCUUUAAUCAGUGUGUAACAUUAGGGAGGACUUGAAAGAGCCACCACAUUUUCACCGAGGCCACGCGGAGUACGAUCGAGUGUACAGUGAACAAUGCUAGGGAGAGCUGCCUAUAUGGAAGAGCCCUAAUGUGUAAAAUUAAUUUUAGUAGUGCUAUCCCCAUGUGAUUUUAAUAGCUUCUUAGGAGAAUGACAAAAAAAAAAAAAAAAAAAAAAAAAAAAAAAAA	UGACUUCUACCUCUUCCAAAG
NC_045512.2	85	92	87	92	2.27	hsa-miR-128-2-5p_MIMAT0031095	12	19	12	17	0.92	-8.65	-11.84	-100943	GUACAGUG&CACUGUAC	((((((((&))))))))	CAAUCUUUAAUCAGUGUGUAACAUUAGGGAGGACUUGAAAGAGCCACCACAUUUUCACCGAGGCCACGCGGAGUACGAUCGAGUGUACAGUGAACAAUGCUAGGGAGAGCUGCCUAUAUGGAAGAGCCCUAAUGUGUAAAAUUAAUUUUAGUAGUGCUAUCCCCAUGUGAUUUUAAUAGCUUCUUAGGAGAAUGACAAAAAAAAAAAAAAAAAAAAAAAAAAAAAAAAA	GGGGGCCGAUACACUGUACGAGA
NC_045512.2	126	138	133	138	2.51	hsa-miR-381-3p_MIMAT0000736	1	11	1	6	2.75	-8.64	-13.9	-101352	GCCCUAAUGUGUA&UAUACAAGGGC	(((((..((((((&)))))))))))	CAAUCUUUAAUCAGUGUGUAACAUUAGGGAGGACUUGAAAGAGCCACCACAUUUUCACCGAGGCCACGCGGAGUACGAUCGAGUGUACAGUGAACAAUGCUAGGGAGAGCUGCCUAUAUGGAAGAGCCCUAAUGUGUAAAAUUAAUUUUAGUAGUGCUAUCCCCAUGUGAUUUUAAUAGCUUCUUAGGAGAAUGACAAAAAAAAAAAAAAAAAAAAAAAAAAAAAAAAA	UAUACAAGGGCAAGCUCUCUGU
NC_045512.2	103	113	108	113	4.12	hsa-miR-548ax_MIMAT0022474	11	21	11	16	1.96	-8.57	-14.65	-100531	GGGAGAGCUGC&GCGGUUUUGCC	((.((((((((&)))))))).))	CAAUCUUUAAUCAGUGUGUAACAUUAGGGAGGACUUGAAAGAGCCACCACAUUUUCACCGAGGCCACGCGGAGUACGAUCGAGUGUACAGUGAACAAUGCUAGGGAGAGCUGCCUAUAUGGAAGAGCCCUAAUGUGUAAAAUUAAUUUUAGUAGUGCUAUCCCCAUGUGAUUUUAAUAGCUUCUUAGGAGAAUGACAAAAAAAAAAAAAAAAAAAAAAAAAAAAAAAAA	AGAAGUAAUUGCGGUUUUGCCA
NC_045512.2	113	129	124	129	6.01	hsa-miR-6793-5p_MIMAT0027486	4	18	4	9	0.87	-8.57	-15.45	-100531	CCUAUAUGGAAGAGCCC&GGGUUCUGGGUUGGG	((((......(((((((&)))))))....))))	CAAUCUUUAAUCAGUGUGUAACAUUAGGGAGGACUUGAAAGAGCCACCACAUUUUCACCGAGGCCACGCGGAGUACGAUCGAGUGUACAGUGAACAAUGCUAGGGAGAGCUGCCUAUAUGGAAGAGCCCUAAUGUGUAAAAUUAAUUUUAGUAGUGCUAUCCCCAUGUGAUUUUAAUAGCUUCUUAGGAGAAUGACAAAAAAAAAAAAAAAAAAAAAAAAAAAAAAAAA	UGUGGGUUCUGGGUUGGGGUGA
NC_045512.2	107	115	110	115	4.43	hsa-miR-185-5p_MIMAT0000455	10	18	10	15	2.04	-8.56	-15.03	-100413	GAGCUGCCU&AGGCAGUUC	(((((((((&)))))))))	CAAUCUUUAAUCAGUGUGUAACAUUAGGGAGGACUUGAAAGAGCCACCACAUUUUCACCGAGGCCACGCGGAGUACGAUCGAGUGUACAGUGAACAAUGCUAGGGAGAGCUGCCUAUAUGGAAGAGCCCUAAUGUGUAAAAUUAAUUUUAGUAGUGCUAUCCCCAUGUGAUUUUAAUAGCUUCUUAGGAGAAUGACAAAAAAAAAAAAAAAAAAAAAAAAAAAAAAAAA	UGGAGAGAAAGGCAGUUCCUGA
NC_045512.2	60	65	60	65	2.45	hsa-miR-5004-3p_MIMAT0021028	15	20	15	20	1.25	-8.56	-12.26	-100413	GAGGCC&GGCCUC	((((((&))))))	CAAUCUUUAAUCAGUGUGUAACAUUAGGGAGGACUUGAAAGAGCCACCACAUUUUCACCGAGGCCACGCGGAGUACGAUCGAGUGUACAGUGAACAAUGCUAGGGAGAGCUGCCUAUAUGGAAGAGCCCUAAUGUGUAAAAUUAAUUUUAGUAGUGCUAUCCCCAUGUGAUUUUAAUAGCUUCUUAGGAGAAUGACAAAAAAAAAAAAAAAAAAAAAAAAAAAAAAAAA	CUUGGAUUUUCCUGGGCCUCAG
NC_045512.2	81	95	81	86	3.43	hsa-miR-148b-5p_MIMAT0004699	3	18	13	18	1.61	-8.53	-13.57	-100061	GAGUGUACAGUGAAC&GUUCUGUUAUACACUC	(((((((....((((&)))).....)))))))	CAAUCUUUAAUCAGUGUGUAACAUUAGGGAGGACUUGAAAGAGCCACCACAUUUUCACCGAGGCCACGCGGAGUACGAUCGAGUGUACAGUGAACAAUGCUAGGGAGAGCUGCCUAUAUGGAAGAGCCCUAAUGUGUAAAAUUAAUUUUAGUAGUGCUAUCCCCAUGUGAUUUUAAUAGCUUCUUAGGAGAAUGACAAAAAAAAAAAAAAAAAAAAAAAAAAAAAAAAA	AAGUUCUGUUAUACACUCAGGC
NC_045512.2	120	138	133	138	3.81	hsa-let-7b-3p_MIMAT0004482	2	21	2	7	0.05	-8.5	-12.36	-0.997095	GGAAGAGCCCUAAUGUGUA&UAUACAACCUACUGCCUUCC	(((((.((..((.((((((&))))))...))..)))))))	CAAUCUUUAAUCAGUGUGUAACAUUAGGGAGGACUUGAAAGAGCCACCACAUUUUCACCGAGGCCACGCGGAGUACGAUCGAGUGUACAGUGAACAAUGCUAGGGAGAGCUGCCUAUAUGGAAGAGCCCUAAUGUGUAAAAUUAAUUUUAGUAGUGCUAUCCCCAUGUGAUUUUAAUAGCUUCUUAGGAGAAUGACAAAAAAAAAAAAAAAAAAAAAAAAAAAAAAAAA	CUAUACAACCUACUGCCUUCCC
NC_045512.2	144	157	152	157	2.41	hsa-miR-605-3p_MIMAT0026621	6	18	6	11	0.37	-8.5	-11.28	-0.997095	AAUUUUAGUAGUGC&GCACUAUGAGAUU	(((((((.((((((&)))))))))))))	CAAUCUUUAAUCAGUGUGUAACAUUAGGGAGGACUUGAAAGAGCCACCACAUUUUCACCGAGGCCACGCGGAGUACGAUCGAGUGUACAGUGAACAAUGCUAGGGAGAGCUGCCUAUAUGGAAGAGCCCUAAUGUGUAAAAUUAAUUUUAGUAGUGCUAUCCCCAUGUGAUUUUAAUAGCUUCUUAGGAGAAUGACAAAAAAAAAAAAAAAAAAAAAAAAAAAAAAAAA	AGAAGGCACUAUGAGAUUUAGA
NC_045512.2	100	113	108	113	4.18	hsa-miR-1301-3p_MIMAT0005797	3	14	3	8	2.69	-8.49	-15.36	-0.985859	CUAGGGAGAGCUGC&GCAGCUGCCUGG	(((((...((((((&)))))).)))))	CAAUCUUUAAUCAGUGUGUAACAUUAGGGAGGACUUGAAAGAGCCACCACAUUUUCACCGAGGCCACGCGGAGUACGAUCGAGUGUACAGUGAACAAUGCUAGGGAGAGCUGCCUAUAUGGAAGAGCCCUAAUGUGUAAAAUUAAUUUUAGUAGUGCUAUCCCCAUGUGAUUUUAAUAGCUUCUUAGGAGAAUGACAAAAAAAAAAAAAAAAAAAAAAAAAAAAAAAAA	UUGCAGCUGCCUGGGAGUGACUUC
NC_045512.2	13	29	23	28	4.26	hsa-miR-504-5p_MIMAT0002875	4	19	5	10	2.41	-8.49	-15.16	-0.995922	AGUGUGUAACAUUAGGG&CCCUGGUCUGCACUCU	((.(((((..(((((((&))))))).))))).))	CAAUCUUUAAUCAGUGUGUAACAUUAGGGAGGACUUGAAAGAGCCACCACAUUUUCACCGAGGCCACGCGGAGUACGAUCGAGUGUACAGUGAACAAUGCUAGGGAGAGCUGCCUAUAUGGAAGAGCCCUAAUGUGUAAAAUUAAUUUUAGUAGUGCUAUCCCCAUGUGAUUUUAAUAGCUUCUUAGGAGAAUGACAAAAAAAAAAAAAAAAAAAAAAAAAAAAAAAAA	AGACCCUGGUCUGCACUCUAUC
NC_045512.2	120	136	131	136	3.7	hsa-miR-23a-3p_MIMAT0000078	3	21	3	8	0.51	-8.48	-12.69	-100021	GGAAGAGCCCUAAUGUG&CACAUUGCCAGGGAUUUCC	((((...((((((((((&))))))...))))..))))	CAAUCUUUAAUCAGUGUGUAACAUUAGGGAGGACUUGAAAGAGCCACCACAUUUUCACCGAGGCCACGCGGAGUACGAUCGAGUGUACAGUGAACAAUGCUAGGGAGAGCUGCCUAUAUGGAAGAGCCCUAAUGUGUAAAAUUAAUUUUAGUAGUGCUAUCCCCAUGUGAUUUUAAUAGCUUCUUAGGAGAAUGACAAAAAAAAAAAAAAAAAAAAAAAAAAAAAAAAA	AUCACAUUGCCAGGGAUUUCC
NC_045512.2	150	168	163	168	4.56	hsa-miR-495-3p_MIMAT0002817	7	21	7	12	0.21	-8.48	-13.25	-0.994749	AGUAGUGCUAUCCCCAUGU&ACAUGGUGCACUUCU	((.(((((.....((((((&)))))).))))).))	CAAUCUUUAAUCAGUGUGUAACAUUAGGGAGGACUUGAAAGAGCCACCACAUUUUCACCGAGGCCACGCGGAGUACGAUCGAGUGUACAGUGAACAAUGCUAGGGAGAGCUGCCUAUAUGGAAGAGCCCUAAUGUGUAAAAUUAAUUUUAGUAGUGCUAUCCCCAUGUGAUUUUAAUAGCUUCUUAGGAGAAUGACAAAAAAAAAAAAAAAAAAAAAAAAAAAAAAAAA	AAACAAACAUGGUGCACUUCUU
NC_045512.2	44	69	64	69	7.69	hsa-miR-6833-5p_MIMAT0027566	1	17	1	6	0.04	-8.48	-16.21	-0.994749	CCACCACAUUUUCACCGAGGCCACGC&GUGUGGAAGAUGGGAGG	((.((.((((((........((((((&)))))))))))))).))	CAAUCUUUAAUCAGUGUGUAACAUUAGGGAGGACUUGAAAGAGCCACCACAUUUUCACCGAGGCCACGCGGAGUACGAUCGAGUGUACAGUGAACAAUGCUAGGGAGAGCUGCCUAUAUGGAAGAGCCCUAAUGUGUAAAAUUAAUUUUAGUAGUGCUAUCCCCAUGUGAUUUUAAUAGCUUCUUAGGAGAAUGACAAAAAAAAAAAAAAAAAAAAAAAAAAAAAAAAA	GUGUGGAAGAUGGGAGGAGAAA
NC_045512.2	123	130	124	129	3.13	hsa-miR-127-5p_MIMAT0004604	12	19	13	18	2.92	-8.47	-14.52	-0.993576	AGAGCCCU&AGGGCUCU	((((((((&))))))))	CAAUCUUUAAUCAGUGUGUAACAUUAGGGAGGACUUGAAAGAGCCACCACAUUUUCACCGAGGCCACGCGGAGUACGAUCGAGUGUACAGUGAACAAUGCUAGGGAGAGCUGCCUAUAUGGAAGAGCCCUAAUGUGUAAAAUUAAUUUUAGUAGUGCUAUCCCCAUGUGAUUUUAAUAGCUUCUUAGGAGAAUGACAAAAAAAAAAAAAAAAAAAAAAAAAAAAAAAAA	CUGAAGCUCAGAGGGCUCUGAU
NC_045512.2	78	96	90	95	3.63	hsa-miR-124-5p_MIMAT0004591	3	22	4	9	2.38	-8.45	-14.46	-0.99123	AUCGAGUGUACAGUGAACA&UGUUCACAGCGGACCUUGAU	((((((.((...(((((((&))))))).....))))))))	CAAUCUUUAAUCAGUGUGUAACAUUAGGGAGGACUUGAAAGAGCCACCACAUUUUCACCGAGGCCACGCGGAGUACGAUCGAGUGUACAGUGAACAAUGCUAGGGAGAGCUGCCUAUAUGGAAGAGCCCUAAUGUGUAAAAUUAAUUUUAGUAGUGCUAUCCCCAUGUGAUUUUAAUAGCUUCUUAGGAGAAUGACAAAAAAAAAAAAAAAAAAAAAAAAAAAAAAAAA	CGUGUUCACAGCGGACCUUGAU
NC_045512.2	30	47	42	47	4.8	hsa-miR-27b-3p_MIMAT0000419	7	19	7	12	1.44	-8.45	-14.69	-0.996669	AGGACUUGAAAGAGCCAC&GUGGCUAAGUUCU	(((((((.....((((((&)))))))))))))	CAAUCUUUAAUCAGUGUGUAACAUUAGGGAGGACUUGAAAGAGCCACCACAUUUUCACCGAGGCCACGCGGAGUACGAUCGAGUGUACAGUGAACAAUGCUAGGGAGAGCUGCCUAUAUGGAAGAGCCCUAAUGUGUAAAAUUAAUUUUAGUAGUGCUAUCCCCAUGUGAUUUUAAUAGCUUCUUAGGAGAAUGACAAAAAAAAAAAAAAAAAAAAAAAAAAAAAAAAA	UUCACAGUGGCUAAGUUCUGC
NC_045512.2	95	110	100	105	5.71	hsa-miR-324-5p_MIMAT0000761	2	19	7	12	3.14	-8.45	-17.3	-0.99123	CAAUGCUAGGGAGAGC&GCAUCCCCUAGGGCAUUG	(((((((((((.((((&)).))))))))..)))))	CAAUCUUUAAUCAGUGUGUAACAUUAGGGAGGACUUGAAAGAGCCACCACAUUUUCACCGAGGCCACGCGGAGUACGAUCGAGUGUACAGUGAACAAUGCUAGGGAGAGCUGCCUAUAUGGAAGAGCCCUAAUGUGUAAAAUUAAUUUUAGUAGUGCUAUCCCCAUGUGAUUUUAAUAGCUUCUUAGGAGAAUGACAAAAAAAAAAAAAAAAAAAAAAAAAAAAAAAAA	CGCAUCCCCUAGGGCAUUGGUG
NC_045512.2	120	138	133	138	3.81	hsa-let-7f-1-3p_MIMAT0004486	2	21	2	7	0.11	-8.44	-12.36	-0.990057	GGAAGAGCCCUAAUGUGUA&UAUACAAUCUAUUGCCUUCC	(((((.((..((.((((((&))))))...))..)))))))	CAAUCUUUAAUCAGUGUGUAACAUUAGGGAGGACUUGAAAGAGCCACCACAUUUUCACCGAGGCCACGCGGAGUACGAUCGAGUGUACAGUGAACAAUGCUAGGGAGAGCUGCCUAUAUGGAAGAGCCCUAAUGUGUAAAAUUAAUUUUAGUAGUGCUAUCCCCAUGUGAUUUUAAUAGCUUCUUAGGAGAAUGACAAAAAAAAAAAAAAAAAAAAAAAAAAAAAAAAA	CUAUACAAUCUAUUGCCUUCCC
NC_045512.2	13	23	18	23	1.87	hsa-miR-744-3p_MIMAT0004946	2	11	2	7	0.64	-8.43	-10.94	-0.988884	AGUGUGUAACA&UGUUGCCACU	((((.((((((&))))))))))	CAAUCUUUAAUCAGUGUGUAACAUUAGGGAGGACUUGAAAGAGCCACCACAUUUUCACCGAGGCCACGCGGAGUACGAUCGAGUGUACAGUGAACAAUGCUAGGGAGAGCUGCCUAUAUGGAAGAGCCCUAAUGUGUAAAAUUAAUUUUAGUAGUGCUAUCCCCAUGUGAUUUUAAUAGCUUCUUAGGAGAAUGACAAAAAAAAAAAAAAAAAAAAAAAAAAAAAAAAA	CUGUUGCCACUAACCUCAACCU
NC_045512.2	98	109	103	108	5.52	hsa-miR-130b-5p_MIMAT0004680	4	17	5	10	0.06	-8.4	-13.98	-0.990771	UGCUAGGGAGAG&CUUUCCCUGUUGCA	(((.((((((((&))))))))...)))	CAAUCUUUAAUCAGUGUGUAACAUUAGGGAGGACUUGAAAGAGCCACCACAUUUUCACCGAGGCCACGCGGAGUACGAUCGAGUGUACAGUGAACAAUGCUAGGGAGAGCUGCCUAUAUGGAAGAGCCCUAAUGUGUAAAAUUAAUUUUAGUAGUGCUAUCCCCAUGUGAUUUUAAUAGCUUCUUAGGAGAAUGACAAAAAAAAAAAAAAAAAAAAAAAAAAAAAAAAA	ACUCUUUCCCUGUUGCACUAC
NC_045512.2	151	157	151	156	2.23	hsa-miR-148a-3p_MIMAT0000243	6	12	7	12	0.56	-8.4	-11.19	-0.985364	GUAGUGC&GCACUAC	(((((((&)))))))	CAAUCUUUAAUCAGUGUGUAACAUUAGGGAGGACUUGAAAGAGCCACCACAUUUUCACCGAGGCCACGCGGAGUACGAUCGAGUGUACAGUGAACAAUGCUAGGGAGAGCUGCCUAUAUGGAAGAGCCCUAAUGUGUAAAAUUAAUUUUAGUAGUGCUAUCCCCAUGUGAUUUUAAUAGCUUCUUAGGAGAAUGACAAAAAAAAAAAAAAAAAAAAAAAAAAAAAAAAA	UCAGUGCACUACAGAACUUUGU
NC_045512.2	17	29	23	28	3.7	hsa-miR-224-3p_MIMAT0009198	10	23	11	16	1.46	-8.4	-13.56	-0.980253	UGUAACAUUAGGG&CCCUAGUGACUACA	((((.((((((((&))))))))..))))	CAAUCUUUAAUCAGUGUGUAACAUUAGGGAGGACUUGAAAGAGCCACCACAUUUUCACCGAGGCCACGCGGAGUACGAUCGAGUGUACAGUGAACAAUGCUAGGGAGAGCUGCCUAUAUGGAAGAGCCCUAAUGUGUAAAAUUAAUUUUAGUAGUGCUAUCCCCAUGUGAUUUUAAUAGCUUCUUAGGAGAAUGACAAAAAAAAAAAAAAAAAAAAAAAAAAAAAAAAA	AAAAUGGUGCCCUAGUGACUACA
NC_045512.2	126	131	126	131	2.38	hsa-miR-202-3p_MIMAT0002811	8	13	8	13	0.15	-8.38	-10.91	-0.994133	GCCCUA&UAGGGC	((((((&))))))	CAAUCUUUAAUCAGUGUGUAACAUUAGGGAGGACUUGAAAGAGCCACCACAUUUUCACCGAGGCCACGCGGAGUACGAUCGAGUGUACAGUGAACAAUGCUAGGGAGAGCUGCCUAUAUGGAAGAGCCCUAAUGUGUAAAAUUAAUUUUAGUAGUGCUAUCCCCAUGUGAUUUUAAUAGCUUCUUAGGAGAAUGACAAAAAAAAAAAAAAAAAAAAAAAAAAAAAAAAA	AGAGGUAUAGGGCAUGGGAA
NC_045512.2	64	85	75	80	6.99	hsa-miR-28-3p_MIMAT0004502	1	21	6	11	2.33	-8.36	-17.68	-0.980672	CCACGCGGAGUACGAUCGAGUG&CACUAGAUUGUGAGCUCCUGG	(((...((((.((((((.((((&)))).))))))...)))))))	CAAUCUUUAAUCAGUGUGUAACAUUAGGGAGGACUUGAAAGAGCCACCACAUUUUCACCGAGGCCACGCGGAGUACGAUCGAGUGUACAGUGAACAAUGCUAGGGAGAGCUGCCUAUAUGGAAGAGCCCUAAUGUGUAAAAUUAAUUUUAGUAGUGCUAUCCCCAUGUGAUUUUAAUAGCUUCUUAGGAGAAUGACAAAAAAAAAAAAAAAAAAAAAAAAAAAAAAAAA	CACUAGAUUGUGAGCUCCUGGA
NC_045512.2	27	32	27	32	3.52	hsa-miR-1306-5p_MIMAT0022726	4	9	4	9	0.01	-8.33	-11.86	-0.977153	GGGAGG&CCUCCC	((((((&))))))	CAAUCUUUAAUCAGUGUGUAACAUUAGGGAGGACUUGAAAGAGCCACCACAUUUUCACCGAGGCCACGCGGAGUACGAUCGAGUGUACAGUGAACAAUGCUAGGGAGAGCUGCCUAUAUGGAAGAGCCCUAAUGUGUAAAAUUAAUUUUAGUAGUGCUAUCCCCAUGUGAUUUUAAUAGCUUCUUAGGAGAAUGACAAAAAAAAAAAAAAAAAAAAAAAAAAAAAAAAA	CCACCUCCCCUGCAAACGUCCA
NC_045512.2	27	32	27	32	3.52	hsa-miR-532-3p_MIMAT0004780	1	6	1	6	0.52	-8.32	-12.36	-0.97598	GGGAGG&CCUCCC	((((((&))))))	CAAUCUUUAAUCAGUGUGUAACAUUAGGGAGGACUUGAAAGAGCCACCACAUUUUCACCGAGGCCACGCGGAGUACGAUCGAGUGUACAGUGAACAAUGCUAGGGAGAGCUGCCUAUAUGGAAGAGCCCUAAUGUGUAAAAUUAAUUUUAGUAGUGCUAUCCCCAUGUGAUUUUAAUAGCUUCUUAGGAGAAUGACAAAAAAAAAAAAAAAAAAAAAAAAAAAAAAAAA	CCUCCCACACCCAAGGCUUGCA
NC_045512.2	39	47	42	47	1.74	hsa-miR-548ae-5p_MIMAT0032115	11	19	11	16	0.21	-8.32	-10.27	-0.987015	AAGAGCCAC&GUGGUUUUU	(((((((((&)))))))))	CAAUCUUUAAUCAGUGUGUAACAUUAGGGAGGACUUGAAAGAGCCACCACAUUUUCACCGAGGCCACGCGGAGUACGAUCGAGUGUACAGUGAACAAUGCUAGGGAGAGCUGCCUAUAUGGAAGAGCCCUAAUGUGUAAAAUUAAUUUUAGUAGUGCUAUCCCCAUGUGAUUUUAAUAGCUUCUUAGGAGAAUGACAAAAAAAAAAAAAAAAAAAAAAAAAAAAAAAAA	AAAAGUAAUUGUGGUUUUUG
NC_045512.2	64	77	64	69	4.16	hsa-miR-1180-3p_MIMAT0005825	5	16	11	16	4.14	-8.27	-16.57	-0.970115	CCACGCGGAGUACG&CGGCUCGCGUGG	(((((((.((..((&)).)))))))))	CAAUCUUUAAUCAGUGUGUAACAUUAGGGAGGACUUGAAAGAGCCACCACAUUUUCACCGAGGCCACGCGGAGUACGAUCGAGUGUACAGUGAACAAUGCUAGGGAGAGCUGCCUAUAUGGAAGAGCCCUAAUGUGUAAAAUUAAUUUUAGUAGUGCUAUCCCCAUGUGAUUUUAAUAGCUUCUUAGGAGAAUGACAAAAAAAAAAAAAAAAAAAAAAAAAAAAAAAAA	UUUCCGGCUCGCGUGGGUGUGU
NC_045512.2	145	159	154	159	2.67	hsa-miR-29a-3p_MIMAT0000086	1	16	1	6	1.18	-8.27	-12.12	-0.970115	AUUUUAGUAGUGCUA&UAGCACCAUCUGAAAU	(((((((..((((((&))))))...)))))))	CAAUCUUUAAUCAGUGUGUAACAUUAGGGAGGACUUGAAAGAGCCACCACAUUUUCACCGAGGCCACGCGGAGUACGAUCGAGUGUACAGUGAACAAUGCUAGGGAGAGCUGCCUAUAUGGAAGAGCCCUAAUGUGUAAAAUUAAUUUUAGUAGUGCUAUCCCCAUGUGAUUUUAAUAGCUUCUUAGGAGAAUGACAAAAAAAAAAAAAAAAAAAAAAAAAAAAAAAAA	UAGCACCAUCUGAAAUCGGUUA
NC_045512.2	129	138	133	138	2.42	hsa-miR-199b-3p_MIMAT0004563	10	19	10	15	1.68	-8.23	-12.33	-0.965423	CUAAUGUGUA&UGCACAUUGG	((((((((((&))))))))))	CAAUCUUUAAUCAGUGUGUAACAUUAGGGAGGACUUGAAAGAGCCACCACAUUUUCACCGAGGCCACGCGGAGUACGAUCGAGUGUACAGUGAACAAUGCUAGGGAGAGCUGCCUAUAUGGAAGAGCCCUAAUGUGUAAAAUUAAUUUUAGUAGUGCUAUCCCCAUGUGAUUUUAAUAGCUUCUUAGGAGAAUGACAAAAAAAAAAAAAAAAAAAAAAAAAAAAAAAAA	ACAGUAGUCUGCACAUUGGUUA
NC_045512.2	129	138	133	138	2.42	hsa-miR-199a-3p_MIMAT0000232	10	19	10	15	1.68	-8.23	-12.33	-0.965423	CUAAUGUGUA&UGCACAUUGG	((((((((((&))))))))))	CAAUCUUUAAUCAGUGUGUAACAUUAGGGAGGACUUGAAAGAGCCACCACAUUUUCACCGAGGCCACGCGGAGUACGAUCGAGUGUACAGUGAACAAUGCUAGGGAGAGCUGCCUAUAUGGAAGAGCCCUAAUGUGUAAAAUUAAUUUUAGUAGUGCUAUCCCCAUGUGAUUUUAAUAGCUUCUUAGGAGAAUGACAAAAAAAAAAAAAAAAAAAAAAAAAAAAAAAAA	ACAGUAGUCUGCACAUUGGUUA
NC_045512.2	189	199	192	197	1.13	hsa-miR-204-5p_MIMAT0000265	6	16	8	13	0.1	-8.23	-9.46	-0.965423	AGAAUGACAAA&UUUGUCAUCCU	((.((((((((&)))))))).))	CAAUCUUUAAUCAGUGUGUAACAUUAGGGAGGACUUGAAAGAGCCACCACAUUUUCACCGAGGCCACGCGGAGUACGAUCGAGUGUACAGUGAACAAUGCUAGGGAGAGCUGCCUAUAUGGAAGAGCCCUAAUGUGUAAAAUUAAUUUUAGUAGUGCUAUCCCCAUGUGAUUUUAAUAGCUUCUUAGGAGAAUGACAAAAAAAAAAAAAAAAAAAAAAAAAAAAAAAAA	UUCCCUUUGUCAUCCUAUGCCU
NC_045512.2	195	206	195	200	0.59	hsa-miR-3613-5p_MIMAT0017990	9	20	15	20	0.02	-8.22	-8.83	-0.96425	ACAAAAAAAAAA&UUUUUUUUUUGU	((((((((((((&))))))))))))	CAAUCUUUAAUCAGUGUGUAACAUUAGGGAGGACUUGAAAGAGCCACCACAUUUUCACCGAGGCCACGCGGAGUACGAUCGAGUGUACAGUGAACAAUGCUAGGGAGAGCUGCCUAUAUGGAAGAGCCCUAAUGUGUAAAAUUAAUUUUAGUAGUGCUAUCCCCAUGUGAUUUUAAUAGCUUCUUAGGAGAAUGACAAAAAAAAAAAAAAAAAAAAAAAAAAAAAAAAA	UGUUGUACUUUUUUUUUUGUUC
NC_045512.2	65	77	65	70	4.12	hsa-miR-375-3p_MIMAT0000728	11	21	16	21	0.97	-8.21	-13.3	-0.963076	CACGCGGAGUACG&CGGCUCGCGUG	((((((.((..((&)).))))))))	CAAUCUUUAAUCAGUGUGUAACAUUAGGGAGGACUUGAAAGAGCCACCACAUUUUCACCGAGGCCACGCGGAGUACGAUCGAGUGUACAGUGAACAAUGCUAGGGAGAGCUGCCUAUAUGGAAGAGCCCUAAUGUGUAAAAUUAAUUUUAGUAGUGCUAUCCCCAUGUGAUUUUAAUAGCUUCUUAGGAGAAUGACAAAAAAAAAAAAAAAAAAAAAAAAAAAAAAAAA	UUUGUUCGUUCGGCUCGCGUGA
NC_045512.2	160	173	162	167	3.66	hsa-miR-551b-5p_MIMAT0004794	2	18	10	15	1.64	-8.2	-13.5	-0.961903	UCCCCAUGUGAUUU&AAAUCAAGCGUGGGUGA	((((((((((((((&))))))..)))))).))	CAAUCUUUAAUCAGUGUGUAACAUUAGGGAGGACUUGAAAGAGCCACCACAUUUUCACCGAGGCCACGCGGAGUACGAUCGAGUGUACAGUGAACAAUGCUAGGGAGAGCUGCCUAUAUGGAAGAGCCCUAAUGUGUAAAAUUAAUUUUAGUAGUGCUAUCCCCAUGUGAUUUUAAUAGCUUCUUAGGAGAAUGACAAAAAAAAAAAAAAAAAAAAAAAAAAAAAAAAA	GAAAUCAAGCGUGGGUGAGACC
NC_045512.2	162	175	162	167	3.01	hsa-miR-146a-5p_MIMAT0000449	8	20	15	20	1.27	-8.19	-12.47	-0.96073	CCCAUGUGAUUUUA&UGAAUUCCAUGGG	((((((.((.((((&)))).))))))))	CAAUCUUUAAUCAGUGUGUAACAUUAGGGAGGACUUGAAAGAGCCACCACAUUUUCACCGAGGCCACGCGGAGUACGAUCGAGUGUACAGUGAACAAUGCUAGGGAGAGCUGCCUAUAUGGAAGAGCCCUAAUGUGUAAAAUUAAUUUUAGUAGUGCUAUCCCCAUGUGAUUUUAAUAGCUUCUUAGGAGAAUGACAAAAAAAAAAAAAAAAAAAAAAAAAAAAAAAAA	UGAGAACUGAAUUCCAUGGGUU
NC_045512.2	21	34	27	32	4.57	hsa-miR-642a-5p_MIMAT0003312	1	16	4	9	0.09	-8.17	-12.83	-0.958384	ACAUUAGGGAGGAC&GUCCCUCUCCAAAUGU	(((((.((((((((&)).))))))..)))))	CAAUCUUUAAUCAGUGUGUAACAUUAGGGAGGACUUGAAAGAGCCACCACAUUUUCACCGAGGCCACGCGGAGUACGAUCGAGUGUACAGUGAACAAUGCUAGGGAGAGCUGCCUAUAUGGAAGAGCCCUAAUGUGUAAAAUUAAUUUUAGUAGUGCUAUCCCCAUGUGAUUUUAAUAGCUUCUUAGGAGAAUGACAAAAAAAAAAAAAAAAAAAAAAAAAAAAAAAAA	GUCCCUCUCCAAAUGUGUCUUG
NC_045512.2	154	165	160	165	3.05	hsa-miR-3177-3p_MIMAT0015054	11	19	11	16	0.87	-8.15	-12.07	-0.961284	GUGCUAUCCCCA&UGGGGACAC	(((...((((((&)))))))))	CAAUCUUUAAUCAGUGUGUAACAUUAGGGAGGACUUGAAAGAGCCACCACAUUUUCACCGAGGCCACGCGGAGUACGAUCGAGUGUACAGUGAACAAUGCUAGGGAGAGCUGCCUAUAUGGAAGAGCCCUAAUGUGUAAAAUUAAUUUUAGUAGUGCUAUCCCCAUGUGAUUUUAAUAGCUUCUUAGGAGAAUGACAAAAAAAAAAAAAAAAAAAAAAAAAAAAAAAAA	UGCACGGCACUGGGGACACGU
NC_045512.2	40	56	40	45	4.32	hsa-miR-296-3p_MIMAT0004679	1	20	15	20	6.88	-8.14	-19.34	-0.954865	AGAGCCACCACAUUUUC&GAGGGUUGGGUGGAGGCUCU	((((((.((((((((((&))))))...)))).))))))	CAAUCUUUAAUCAGUGUGUAACAUUAGGGAGGACUUGAAAGAGCCACCACAUUUUCACCGAGGCCACGCGGAGUACGAUCGAGUGUACAGUGAACAAUGCUAGGGAGAGCUGCCUAUAUGGAAGAGCCCUAAUGUGUAAAAUUAAUUUUAGUAGUGCUAUCCCCAUGUGAUUUUAAUAGCUUCUUAGGAGAAUGACAAAAAAAAAAAAAAAAAAAAAAAAAAAAAAAAA	GAGGGUUGGGUGGAGGCUCUCC
NC_045512.2	39	47	42	47	1.74	hsa-miR-548ay-5p_MIMAT0025452	11	19	11	16	0.39	-8.14	-10.27	-0.960104	AAGAGCCAC&GUGGUUUUU	(((((((((&)))))))))	CAAUCUUUAAUCAGUGUGUAACAUUAGGGAGGACUUGAAAGAGCCACCACAUUUUCACCGAGGCCACGCGGAGUACGAUCGAGUGUACAGUGAACAAUGCUAGGGAGAGCUGCCUAUAUGGAAGAGCCCUAAUGUGUAAAAUUAAUUUUAGUAGUGCUAUCCCCAUGUGAUUUUAAUAGCUUCUUAGGAGAAUGACAAAAAAAAAAAAAAAAAAAAAAAAAAAAAAAAA	AAAAGUAAUUGUGGUUUUUGC
NC_045512.2	153	163	153	158	3	hsa-miR-518f-5p_MIMAT0002841	8	17	12	17	3.59	-8.13	-14.72	-0.953692	AGUGCUAUCCC&GGGAAGCACU	((((((.((((&))))))))))	CAAUCUUUAAUCAGUGUGUAACAUUAGGGAGGACUUGAAAGAGCCACCACAUUUUCACCGAGGCCACGCGGAGUACGAUCGAGUGUACAGUGAACAAUGCUAGGGAGAGCUGCCUAUAUGGAAGAGCCCUAAUGUGUAAAAUUAAUUUUAGUAGUGCUAUCCCCAUGUGAUUUUAAUAGCUUCUUAGGAGAAUGACAAAAAAAAAAAAAAAAAAAAAAAAAAAAAAAAA	CUCUAGAGGGAAGCACUUUCUC
NC_045512.2	150	161	153	158	2.91	hsa-miR-142-5p_MIMAT0000433	10	21	13	18	3.33	-8.12	-14.36	-0.957745	AGUAGUGCUAUC&GAAAGCACUACU	(((((((((.((&)).)))))))))	CAAUCUUUAAUCAGUGUGUAACAUUAGGGAGGACUUGAAAGAGCCACCACAUUUUCACCGAGGCCACGCGGAGUACGAUCGAGUGUACAGUGAACAAUGCUAGGGAGAGCUGCCUAUAUGGAAGAGCCCUAAUGUGUAAAAUUAAUUUUAGUAGUGCUAUCCCCAUGUGAUUUUAAUAGCUUCUUAGGAGAAUGACAAAAAAAAAAAAAAAAAAAAAAAAAAAAAAAAA	CAUAAAGUAGAAAGCACUACU
NC_045512.2	47	59	51	56	2.45	hsa-miR-1249-5p_MIMAT0032029	6	17	9	14	0.9	-8.11	-11.46	-0.941734	CCACAUUUUCACC&GGAGGAGAUGGG	((.(((((((.((&)).)))))))))	CAAUCUUUAAUCAGUGUGUAACAUUAGGGAGGACUUGAAAGAGCCACCACAUUUUCACCGAGGCCACGCGGAGUACGAUCGAGUGUACAGUGAACAAUGCUAGGGAGAGCUGCCUAUAUGGAAGAGCCCUAAUGUGUAAAAUUAAUUUUAGUAGUGCUAUCCCCAUGUGAUUUUAAUAGCUUCUUAGGAGAAUGACAAAAAAAAAAAAAAAAAAAAAAAAAAAAAAAAA	AGGAGGGAGGAGAUGGGCCAAGUU
NC_045512.2	85	93	85	90	2.28	hsa-miR-16-2-3p_MIMAT0004518	7	15	10	15	0.16	-8.1	-10.54	-0.950173	GUACAGUGA&UUACUGUGC	(((((((((&)))))))))	CAAUCUUUAAUCAGUGUGUAACAUUAGGGAGGACUUGAAAGAGCCACCACAUUUUCACCGAGGCCACGCGGAGUACGAUCGAGUGUACAGUGAACAAUGCUAGGGAGAGCUGCCUAUAUGGAAGAGCCCUAAUGUGUAAAAUUAAUUUUAGUAGUGCUAUCCCCAUGUGAUUUUAAUAGCUUCUUAGGAGAAUGACAAAAAAAAAAAAAAAAAAAAAAAAAAAAAAAAA	CCAAUAUUACUGUGCUGCUUUA
NC_045512.2	26	33	27	32	3.93	hsa-miR-449c-3p_MIMAT0013771	14	21	15	20	0.01	-8.1	-12.04	-0.945244	AGGGAGGA&UCCUCUCU	((((((((&))))))))	CAAUCUUUAAUCAGUGUGUAACAUUAGGGAGGACUUGAAAGAGCCACCACAUUUUCACCGAGGCCACGCGGAGUACGAUCGAGUGUACAGUGAACAAUGCUAGGGAGAGCUGCCUAUAUGGAAGAGCCCUAAUGUGUAAAAUUAAUUUUAGUAGUGCUAUCCCCAUGUGAUUUUAAUAGCUUCUUAGGAGAAUGACAAAAAAAAAAAAAAAAAAAAAAAAAAAAAAAAA	UUGCUAGUUGCACUCCUCUCUGU
NC_045512.2	100	113	105	110	4.18	hsa-miR-185-3p_MIMAT0004611	5	20	9	14	4.35	-8.09	-16.62	-0.949	CUAGGGAGAGCUGC&GCUGGCUUUCCUCUGG	(((((((((((.((&))..))))))).))))	CAAUCUUUAAUCAGUGUGUAACAUUAGGGAGGACUUGAAAGAGCCACCACAUUUUCACCGAGGCCACGCGGAGUACGAUCGAGUGUACAGUGAACAAUGCUAGGGAGAGCUGCCUAUAUGGAAGAGCCCUAAUGUGUAAAAUUAAUUUUAGUAGUGCUAUCCCCAUGUGAUUUUAAUAGCUUCUUAGGAGAAUGACAAAAAAAAAAAAAAAAAAAAAAAAAAAAAAAAA	AGGGGCUGGCUUUCCUCUGGUC
NC_045512.2	60	75	70	75	6.17	hsa-miR-508-5p_MIMAT0004778	1	16	1	6	2.89	-8.06	-17.12	-0.940576	GAGGCCACGCGGAGUA&UACUCCAGAGGGCGUC	((.(((....((((((&))))))....))).))	CAAUCUUUAAUCAGUGUGUAACAUUAGGGAGGACUUGAAAGAGCCACCACAUUUUCACCGAGGCCACGCGGAGUACGAUCGAGUGUACAGUGAACAAUGCUAGGGAGAGCUGCCUAUAUGGAAGAGCCCUAAUGUGUAAAAUUAAUUUUAGUAGUGCUAUCCCCAUGUGAUUUUAAUAGCUUCUUAGGAGAAUGACAAAAAAAAAAAAAAAAAAAAAAAAAAAAAAAAA	UACUCCAGAGGGCGUCACUCAUG
NC_045512.2	151	157	152	157	2.23	hsa-miR-130b-5p_MIMAT0004680	15	21	15	20	0.04	-8.05	-10.32	-0.949489	GUAGUGC&GCACUAC	(((((((&)))))))	CAAUCUUUAAUCAGUGUGUAACAUUAGGGAGGACUUGAAAGAGCCACCACAUUUUCACCGAGGCCACGCGGAGUACGAUCGAGUGUACAGUGAACAAUGCUAGGGAGAGCUGCCUAUAUGGAAGAGCCCUAAUGUGUAAAAUUAAUUUUAGUAGUGCUAUCCCCAUGUGAUUUUAAUAGCUUCUUAGGAGAAUGACAAAAAAAAAAAAAAAAAAAAAAAAAAAAAAAAA	ACUCUUUCCCUGUUGCACUAC
NC_045512.2	108	113	108	113	1.44	hsa-miR-191-5p_MIMAT0000440	17	22	17	22	0.04	-8.05	-9.53	-0.939409	AGCUGC&GCAGCU	((((((&))))))	CAAUCUUUAAUCAGUGUGUAACAUUAGGGAGGACUUGAAAGAGCCACCACAUUUUCACCGAGGCCACGCGGAGUACGAUCGAGUGUACAGUGAACAAUGCUAGGGAGAGCUGCCUAUAUGGAAGAGCCCUAAUGUGUAAAAUUAAUUUUAGUAGUGCUAUCCCCAUGUGAUUUUAAUAGCUUCUUAGGAGAAUGACAAAAAAAAAAAAAAAAAAAAAAAAAAAAAAAAA	CAACGGAAUCCCAAAAGCAGCUG
NC_045512.2	27	46	30	35	6.05	hsa-miR-3688-5p_MIMAT0019223	3	17	9	14	2.73	-8.04	-16.82	-0.94831	GGGAGGACUUGAAAGAGCCA&UGGCAAAGUCUUUCC	((((((((((......((((&)))).))))))))))	CAAUCUUUAAUCAGUGUGUAACAUUAGGGAGGACUUGAAAGAGCCACCACAUUUUCACCGAGGCCACGCGGAGUACGAUCGAGUGUACAGUGAACAAUGCUAGGGAGAGCUGCCUAUAUGGAAGAGCCCUAAUGUGUAAAAUUAAUUUUAGUAGUGCUAUCCCCAUGUGAUUUUAAUAGCUUCUUAGGAGAAUGACAAAAAAAAAAAAAAAAAAAAAAAAAAAAAAAAA	AGUGGCAAAGUCUUUCCAUAU
NC_045512.2	66	76	66	71	4	hsa-miR-655-5p_MIMAT0026626	5	15	10	15	1.01	-8.04	-13.05	-0.943135	ACGCGGAGUAC&GUUAUCCGUGU	(((((((..((&))..)))))))	CAAUCUUUAAUCAGUGUGUAACAUUAGGGAGGACUUGAAAGAGCCACCACAUUUUCACCGAGGCCACGCGGAGUACGAUCGAGUGUACAGUGAACAAUGCUAGGGAGAGCUGCCUAUAUGGAAGAGCCCUAAUGUGUAAAAUUAAUUUUAGUAGUGCUAUCCCCAUGUGAUUUUAAUAGCUUCUUAGGAGAAUGACAAAAAAAAAAAAAAAAAAAAAAAAAAAAAAAAA	AGAGGUUAUCCGUGUUAUGUUC
NC_045512.2	71	86	76	81	5.3	hsa-miR-323b-3p_MIMAT0015050	5	20	10	15	0.82	-8.03	-14.15	-0.941962	GAGUACGAUCGAGUGU&AUACACGGUCGACCUC	(((..((((((.((((&)))).))))))..)))	CAAUCUUUAAUCAGUGUGUAACAUUAGGGAGGACUUGAAAGAGCCACCACAUUUUCACCGAGGCCACGCGGAGUACGAUCGAGUGUACAGUGAACAAUGCUAGGGAGAGCUGCCUAUAUGGAAGAGCCCUAAUGUGUAAAAUUAAUUUUAGUAGUGCUAUCCCCAUGUGAUUUUAAUAGCUUCUUAGGAGAAUGACAAAAAAAAAAAAAAAAAAAAAAAAAAAAAAAAA	CCCAAUACACGGUCGACCUCUU
NC_045512.2	18	37	32	37	6.23	hsa-miR-370-5p_MIMAT0026483	1	22	1	6	1.12	-8.03	-15.38	-0.941962	GUAACAUUAGGGAGGACUUG&CAGGUCACGUCUCUGCAGUUAC	(((((...(((((.((((((&))))))...)))))...)))))	CAAUCUUUAAUCAGUGUGUAACAUUAGGGAGGACUUGAAAGAGCCACCACAUUUUCACCGAGGCCACGCGGAGUACGAUCGAGUGUACAGUGAACAAUGCUAGGGAGAGCUGCCUAUAUGGAAGAGCCCUAAUGUGUAAAAUUAAUUUUAGUAGUGCUAUCCCCAUGUGAUUUUAAUAGCUUCUUAGGAGAAUGACAAAAAAAAAAAAAAAAAAAAAAAAAAAAAAAAA	CAGGUCACGUCUCUGCAGUUAC
NC_045512.2	46	58	46	51	2.43	hsa-miR-548az-5p_MIMAT0025456	6	16	11	16	0.64	-8.03	-11.1	-0.941962	ACCACAUUUUCAC&GUGAUUGUGGU	((((((...((((&)))).))))))	CAAUCUUUAAUCAGUGUGUAACAUUAGGGAGGACUUGAAAGAGCCACCACAUUUUCACCGAGGCCACGCGGAGUACGAUCGAGUGUACAGUGAACAAUGCUAGGGAGAGCUGCCUAUAUGGAAGAGCCCUAAUGUGUAAAAUUAAUUUUAGUAGUGCUAUCCCCAUGUGAUUUUAAUAGCUUCUUAGGAGAAUGACAAAAAAAAAAAAAAAAAAAAAAAAAAAAAAAAA	CAAAAGUGAUUGUGGUUUUUGC
NC_045512.2	85	95	85	90	3.21	hsa-miR-181a-2-3p_MIMAT0004558	11	21	16	21	0.26	-8.02	-11.49	-0.940788	GUACAGUGAAC&GUUGACUGUAC	(((((((..((&))..)))))))	CAAUCUUUAAUCAGUGUGUAACAUUAGGGAGGACUUGAAAGAGCCACCACAUUUUCACCGAGGCCACGCGGAGUACGAUCGAGUGUACAGUGAACAAUGCUAGGGAGAGCUGCCUAUAUGGAAGAGCCCUAAUGUGUAAAAUUAAUUUUAGUAGUGCUAUCCCCAUGUGAUUUUAAUAGCUUCUUAGGAGAAUGACAAAAAAAAAAAAAAAAAAAAAAAAAAAAAAAAA	ACCACUGACCGUUGACUGUACC
NC_045512.2	124	130	124	129	2.42	hsa-miR-345-5p_MIMAT0000772	16	22	17	22	2.35	-8.02	-12.79	-0.940788	GAGCCCU&AGGGCUC	(((((((&)))))))	CAAUCUUUAAUCAGUGUGUAACAUUAGGGAGGACUUGAAAGAGCCACCACAUUUUCACCGAGGCCACGCGGAGUACGAUCGAGUGUACAGUGAACAAUGCUAGGGAGAGCUGCCUAUAUGGAAGAGCCCUAAUGUGUAAAAUUAAUUUUAGUAGUGCUAUCCCCAUGUGAUUUUAAUAGCUUCUUAGGAGAAUGACAAAAAAAAAAAAAAAAAAAAAAAAAAAAAAAAA	GCUGACUCCUAGUCCAGGGCUC
NC_045512.2	49	67	56	61	5.19	hsa-miR-4684-3p_MIMAT0019770	2	22	10	15	3	-8.02	-16.21	-0.940788	ACAUUUUCACCGAGGCCAC&GUUGCAAGUCGGUGGAGACGU	((.((((((((((.((.((&)).))...)))))))))).))	CAAUCUUUAAUCAGUGUGUAACAUUAGGGAGGACUUGAAAGAGCCACCACAUUUUCACCGAGGCCACGCGGAGUACGAUCGAGUGUACAGUGAACAAUGCUAGGGAGAGCUGCCUAUAUGGAAGAGCCCUAAUGUGUAAAAUUAAUUUUAGUAGUGCUAUCCCCAUGUGAUUUUAAUAGCUUCUUAGGAGAAUGACAAAAAAAAAAAAAAAAAAAAAAAAAAAAAAAAA	UGUUGCAAGUCGGUGGAGACGU
NC_045512.2	125	141	136	141	2.56	hsa-miR-129-5p_MIMAT0000242	3	18	3	8	1.49	-8.01	-12.06	-0.944771	AGCCCUAAUGUGUAAAA&UUUUGCGGUCUGGGCU	(((((......((((((&)))))).....)))))	CAAUCUUUAAUCAGUGUGUAACAUUAGGGAGGACUUGAAAGAGCCACCACAUUUUCACCGAGGCCACGCGGAGUACGAUCGAGUGUACAGUGAACAAUGCUAGGGAGAGCUGCCUAUAUGGAAGAGCCCUAAUGUGUAAAAUUAAUUUUAGUAGUGCUAUCCCCAUGUGAUUUUAAUAGCUUCUUAGGAGAAUGACAAAAAAAAAAAAAAAAAAAAAAAAAAAAAAAAA	CUUUUUGCGGUCUGGGCUUGC
NC_045512.2	64	76	71	76	4.16	hsa-miR-18a-3p_MIMAT0002891	11	23	11	16	1.54	-8	-13.7	-0.933574	CCACGCGGAGUAC&GUGCUCCUUCUGG	(((...(((((((&)))))))...)))	CAAUCUUUAAUCAGUGUGUAACAUUAGGGAGGACUUGAAAGAGCCACCACAUUUUCACCGAGGCCACGCGGAGUACGAUCGAGUGUACAGUGAACAAUGCUAGGGAGAGCUGCCUAUAUGGAAGAGCCCUAAUGUGUAAAAUUAAUUUUAGUAGUGCUAUCCCCAUGUGAUUUUAAUAGCUUCUUAGGAGAAUGACAAAAAAAAAAAAAAAAAAAAAAAAAAAAAAAAA	ACUGCCCUAAGUGCUCCUUCUGG
NC_045512.2	176	186	178	183	2.79	hsa-let-7e-5p_MIMAT0000066	6	16	9	14	0.24	-7.99	-11.02	-0.937269	AUAGCUUCUUA&UAGGAGGUUGU	(((((((((((&)))))))))))	CAAUCUUUAAUCAGUGUGUAACAUUAGGGAGGACUUGAAAGAGCCACCACAUUUUCACCGAGGCCACGCGGAGUACGAUCGAGUGUACAGUGAACAAUGCUAGGGAGAGCUGCCUAUAUGGAAGAGCCCUAAUGUGUAAAAUUAAUUUUAGUAGUGCUAUCCCCAUGUGAUUUUAAUAGCUUCUUAGGAGAAUGACAAAAAAAAAAAAAAAAAAAAAAAAAAAAAAAAA	UGAGGUAGGAGGUUGUAUAGUU
NC_045512.2	40	46	40	45	1.32	hsa-miR-212-5p_MIMAT0022695	5	11	6	11	2.18	-7.97	-11.47	-0.930073	AGAGCCA&UGGCUCU	(((((((&)))))))	CAAUCUUUAAUCAGUGUGUAACAUUAGGGAGGACUUGAAAGAGCCACCACAUUUUCACCGAGGCCACGCGGAGUACGAUCGAGUGUACAGUGAACAAUGCUAGGGAGAGCUGCCUAUAUGGAAGAGCCCUAAUGUGUAAAAUUAAUUUUAGUAGUGCUAUCCCCAUGUGAUUUUAAUAGCUUCUUAGGAGAAUGACAAAAAAAAAAAAAAAAAAAAAAAAAAAAAAAAA	ACCUUGGCUCUAGACUGCUUACU
NC_045512.2	113	128	123	128	5.61	hsa-miR-760_MIMAT0004957	2	18	2	7	2.84	-7.94	-16.39	-0.941935	CCUAUAUGGAAGAGCC&GGCUCUGGGUCUGUGGG	((((((....((((((&)))))).....))))))	CAAUCUUUAAUCAGUGUGUAACAUUAGGGAGGACUUGAAAGAGCCACCACAUUUUCACCGAGGCCACGCGGAGUACGAUCGAGUGUACAGUGAACAAUGCUAGGGAGAGCUGCCUAUAUGGAAGAGCCCUAAUGUGUAAAAUUAAUUUUAGUAGUGCUAUCCCCAUGUGAUUUUAAUAGCUUCUUAGGAGAAUGACAAAAAAAAAAAAAAAAAAAAAAAAAAAAAAAAA	CGGCUCUGGGUCUGUGGGGA
NC_045512.2	28	39	33	38	4.02	hsa-miR-26a-5p_MIMAT0000082	1	12	2	7	0.7	-7.93	-12.65	-0.930231	GGAGGACUUGAA&UUCAAGUAAUCC	(((..(((((((&)))))))..)))	CAAUCUUUAAUCAGUGUGUAACAUUAGGGAGGACUUGAAAGAGCCACCACAUUUUCACCGAGGCCACGCGGAGUACGAUCGAGUGUACAGUGAACAAUGCUAGGGAGAGCUGCCUAUAUGGAAGAGCCCUAAUGUGUAAAAUUAAUUUUAGUAGUGCUAUCCCCAUGUGAUUUUAAUAGCUUCUUAGGAGAAUGACAAAAAAAAAAAAAAAAAAAAAAAAAAAAAAAAA	UUCAAGUAAUCCAGGAUAGGCU
NC_045512.2	129	138	133	138	2.42	hsa-miR-155-3p_MIMAT0004658	5	14	5	10	0.1	-7.92	-10.44	-0.929058	CUAAUGUGUA&UACAUAUUAG	((((((((((&))))))))))	CAAUCUUUAAUCAGUGUGUAACAUUAGGGAGGACUUGAAAGAGCCACCACAUUUUCACCGAGGCCACGCGGAGUACGAUCGAGUGUACAGUGAACAAUGCUAGGGAGAGCUGCCUAUAUGGAAGAGCCCUAAUGUGUAAAAUUAAUUUUAGUAGUGCUAUCCCCAUGUGAUUUUAAUAGCUUCUUAGGAGAAUGACAAAAAAAAAAAAAAAAAAAAAAAAAAAAAAAAA	CUCCUACAUAUUAGCAUUAACA
NC_045512.2	60	71	60	65	4.03	hsa-miR-6791-3p_MIMAT0027483	6	15	10	15	0.2	-7.91	-12.14	-0.932976	GAGGCCACGCGG&CCUUGGUCUC	(((((((...((&)).)))))))	CAAUCUUUAAUCAGUGUGUAACAUUAGGGAGGACUUGAAAGAGCCACCACAUUUUCACCGAGGCCACGCGGAGUACGAUCGAGUGUACAGUGAACAAUGCUAGGGAGAGCUGCCUAUAUGGAAGAGCCCUAAUGUGUAAAAUUAAUUUUAGUAGUGCUAUCCCCAUGUGAUUUUAAUAGCUUCUUAGGAGAAUGACAAAAAAAAAAAAAAAAAAAAAAAAAAAAAAAAA	UGCCUCCUUGGUCUCCGGCAG
NC_045512.2	44	49	44	49	1.1	hsa-miR-654-5p_MIMAT0003330	1	6	1	6	0.24	-7.91	-9.25	-0.927885	CCACCA&UGGUGG	((((((&))))))	CAAUCUUUAAUCAGUGUGUAACAUUAGGGAGGACUUGAAAGAGCCACCACAUUUUCACCGAGGCCACGCGGAGUACGAUCGAGUGUACAGUGAACAAUGCUAGGGAGAGCUGCCUAUAUGGAAGAGCCCUAAUGUGUAAAAUUAAUUUUAGUAGUGCUAUCCCCAUGUGAUUUUAAUAGCUUCUUAGGAGAAUGACAAAAAAAAAAAAAAAAAAAAAAAAAAAAAAAAA	UGGUGGGCCGCAGAACAUGUGC
NC_045512.2	123	135	123	128	3.36	hsa-miR-1306-3p_MIMAT0005950	1	11	6	11	0.49	-7.86	-11.71	-0.944247	AGAGCCCUAAUGU&ACGUUGGCUCU	((((((...((((&)))).))))))	CAAUCUUUAAUCAGUGUGUAACAUUAGGGAGGACUUGAAAGAGCCACCACAUUUUCACCGAGGCCACGCGGAGUACGAUCGAGUGUACAGUGAACAAUGCUAGGGAGAGCUGCCUAUAUGGAAGAGCCCUAAUGUGUAAAAUUAAUUUUAGUAGUGCUAUCCCCAUGUGAUUUUAAUAGCUUCUUAGGAGAAUGACAAAAAAAAAAAAAAAAAAAAAAAAAAAAAAAAA	ACGUUGGCUCUGGUGGUG
NC_045512.2	26	34	27	32	3.97	hsa-miR-3617-3p_MIMAT0022966	15	23	17	22	0.32	-7.85	-12.14	-0.91607	AGGGAGGAC&GUCCUUUCU	(((((((((&)))))))))	CAAUCUUUAAUCAGUGUGUAACAUUAGGGAGGACUUGAAAGAGCCACCACAUUUUCACCGAGGCCACGCGGAGUACGAUCGAGUGUACAGUGAACAAUGCUAGGGAGAGCUGCCUAUAUGGAAGAGCCCUAAUGUGUAAAAUUAAUUUUAGUAGUGCUAUCCCCAUGUGAUUUUAAUAGCUUCUUAGGAGAAUGACAAAAAAAAAAAAAAAAAAAAAAAAAAAAAAAAA	CAUCAGCACCCUAUGUCCUUUCU
NC_045512.2	102	108	103	108	3.81	hsa-miR-877-3p_MIMAT0004950	7	13	7	12	0	-7.85	-11.66	-0.925899	AGGGAGA&UCUCCCU	(((((((&)))))))	CAAUCUUUAAUCAGUGUGUAACAUUAGGGAGGACUUGAAAGAGCCACCACAUUUUCACCGAGGCCACGCGGAGUACGAUCGAGUGUACAGUGAACAAUGCUAGGGAGAGCUGCCUAUAUGGAAGAGCCCUAAUGUGUAAAAUUAAUUUUAGUAGUGCUAUCCCCAUGUGAUUUUAAUAGCUUCUUAGGAGAAUGACAAAAAAAAAAAAAAAAAAAAAAAAAAAAAAAAA	UCCUCUUCUCCCUCCUCCCAG
NC_045512.2	162	170	162	167	2.94	hsa-miR-1180-3p_MIMAT0005825	9	17	12	17	4.06	-7.84	-14.84	-0.919674	CCCAUGUGA&UCGCGUGGG	(((((((((&)))))))))	CAAUCUUUAAUCAGUGUGUAACAUUAGGGAGGACUUGAAAGAGCCACCACAUUUUCACCGAGGCCACGCGGAGUACGAUCGAGUGUACAGUGAACAAUGCUAGGGAGAGCUGCCUAUAUGGAAGAGCCCUAAUGUGUAAAAUUAAUUUUAGUAGUGCUAUCCCCAUGUGAUUUUAAUAGCUUCUUAGGAGAAUGACAAAAAAAAAAAAAAAAAAAAAAAAAAAAAAAAA	UUUCCGGCUCGCGUGGGUGUGU
NC_045512.2	158	164	159	164	2.41	hsa-miR-6505-5p_MIMAT0025466	9	15	9	14	1.62	-7.8	-11.83	-0.914981	UAUCCCC&GGGGAUA	(((((((&)))))))	CAAUCUUUAAUCAGUGUGUAACAUUAGGGAGGACUUGAAAGAGCCACCACAUUUUCACCGAGGCCACGCGGAGUACGAUCGAGUGUACAGUGAACAAUGCUAGGGAGAGCUGCCUAUAUGGAAGAGCCCUAAUGUGUAAAAUUAAUUUUAGUAGUGCUAUCCCCAUGUGAUUUUAAUAGCUUCUUAGGAGAAUGACAAAAAAAAAAAAAAAAAAAAAAAAAAAAAAAAA	UUGGAAUAGGGGAUAUCUCAGC
NC_045512.2	12	25	20	25	2.02	hsa-miR-33a-3p_MIMAT0004506	2	16	2	7	1.02	-7.77	-10.81	-0.911462	CAGUGUGUAACAUU&AAUGUUUCCACAGUG	((.((((.((((((&))))))..)))).))	CAAUCUUUAAUCAGUGUGUAACAUUAGGGAGGACUUGAAAGAGCCACCACAUUUUCACCGAGGCCACGCGGAGUACGAUCGAGUGUACAGUGAACAAUGCUAGGGAGAGCUGCCUAUAUGGAAGAGCCCUAAUGUGUAAAAUUAAUUUUAGUAGUGCUAUCCCCAUGUGAUUUUAAUAGCUUCUUAGGAGAAUGACAAAAAAAAAAAAAAAAAAAAAAAAAAAAAAAAA	CAAUGUUUCCACAGUGCAUCAC
NC_045512.2	150	163	153	158	3.15	hsa-miR-520c-5p_MIMAT0005455	8	21	12	17	4.09	-7.75	-14.99	-0.909116	AGUAGUGCUAUCCC&GGGAAGCACUUUCU	((.((((((.((((&))))))))))..))	CAAUCUUUAAUCAGUGUGUAACAUUAGGGAGGACUUGAAAGAGCCACCACAUUUUCACCGAGGCCACGCGGAGUACGAUCGAGUGUACAGUGAACAAUGCUAGGGAGAGCUGCCUAUAUGGAAGAGCCCUAAUGUGUAAAAUUAAUUUUAGUAGUGCUAUCCCCAUGUGAUUUUAAUAGCUUCUUAGGAGAAUGACAAAAAAAAAAAAAAAAAAAAAAAAAAAAAAAAA	CUCUAGAGGGAAGCACUUUCUG
NC_045512.2	47	55	47	52	2.26	hsa-miR-576-3p_MIMAT0004796	1	9	4	9	0.22	-7.71	-10.19	-0.904424	CCACAUUUU&AAGAUGUGG	(((((((((&)))))))))	CAAUCUUUAAUCAGUGUGUAACAUUAGGGAGGACUUGAAAGAGCCACCACAUUUUCACCGAGGCCACGCGGAGUACGAUCGAGUGUACAGUGAACAAUGCUAGGGAGAGCUGCCUAUAUGGAAGAGCCCUAAUGUGUAAAAUUAAUUUUAGUAGUGCUAUCCCCAUGUGAUUUUAAUAGCUUCUUAGGAGAAUGACAAAAAAAAAAAAAAAAAAAAAAAAAAAAAAAAA	AAGAUGUGGAAAAAUUGGAAUC
NC_045512.2	161	174	169	174	3.01	hsa-miR-361-5p_MIMAT0000703	6	19	6	11	0.79	-7.69	-11.49	-0.902078	CCCCAUGUGAUUUU&AGAAUCUCCAGGGG	((((.((.((((((&))))))..))))))	CAAUCUUUAAUCAGUGUGUAACAUUAGGGAGGACUUGAAAGAGCCACCACAUUUUCACCGAGGCCACGCGGAGUACGAUCGAGUGUACAGUGAACAAUGCUAGGGAGAGCUGCCUAUAUGGAAGAGCCCUAAUGUGUAAAAUUAAUUUUAGUAGUGCUAUCCCCAUGUGAUUUUAAUAGCUUCUUAGGAGAAUGACAAAAAAAAAAAAAAAAAAAAAAAAAAAAAAAAA	UUAUCAGAAUCUCCAGGGGUAC
NC_045512.2	93	108	103	108	5.61	hsa-miR-4778-3p_MIMAT0019937	4	20	4	9	1.42	-7.69	-14.72	-0.902078	AACAAUGCUAGGGAGA&UCUUCCUUUGCAGAGUU	(((..(((.(((((((&)))))))..)))..)))	CAAUCUUUAAUCAGUGUGUAACAUUAGGGAGGACUUGAAAGAGCCACCACAUUUUCACCGAGGCCACGCGGAGUACGAUCGAGUGUACAGUGAACAAUGCUAGGGAGAGCUGCCUAUAUGGAAGAGCCCUAAUGUGUAAAAUUAAUUUUAGUAGUGCUAUCCCCAUGUGAUUUUAAUAGCUUCUUAGGAGAAUGACAAAAAAAAAAAAAAAAAAAAAAAAAAAAAAAAA	UCUUCUUCCUUUGCAGAGUUGA
NC_045512.2	133	157	148	153	3.26	hsa-miR-24-2-5p_MIMAT0004497	2	21	5	10	1.14	-7.67	-12.07	-0.899732	UGUGUAAAAUUAAUUUUAGUAGUGC&GCCUACUGAGCUGAAACACA	(((((....((....(((((((.((&)))))))))....)))))))	CAAUCUUUAAUCAGUGUGUAACAUUAGGGAGGACUUGAAAGAGCCACCACAUUUUCACCGAGGCCACGCGGAGUACGAUCGAGUGUACAGUGAACAAUGCUAGGGAGAGCUGCCUAUAUGGAAGAGCCCUAAUGUGUAAAAUUAAUUUUAGUAGUGCUAUCCCCAUGUGAUUUUAAUAGCUUCUUAGGAGAAUGACAAAAAAAAAAAAAAAAAAAAAAAAAAAAAAAAA	UGCCUACUGAGCUGAAACACAG
NC_045512.2	121	139	129	134	3.79	hsa-miR-556-3p_MIMAT0004793	4	19	8	13	0.02	-7.65	-11.46	-0.897385	GAAGAGCCCUAAUGUGUAA&UUACCAUUAGCUCAUC	((.(((..((((((.((((&))))))))))))).))	CAAUCUUUAAUCAGUGUGUAACAUUAGGGAGGACUUGAAAGAGCCACCACAUUUUCACCGAGGCCACGCGGAGUACGAUCGAGUGUACAGUGAACAAUGCUAGGGAGAGCUGCCUAUAUGGAAGAGCCCUAAUGUGUAAAAUUAAUUUUAGUAGUGCUAUCCCCAUGUGAUUUUAAUAGCUUCUUAGGAGAAUGACAAAAAAAAAAAAAAAAAAAAAAAAAAAAAAAAA	AUAUUACCAUUAGCUCAUCUUU
NC_045512.2	46	60	55	60	2.43	hsa-miR-598-5p_MIMAT0026620	2	17	2	7	2.62	-7.65	-12.7	-0.89273	ACCACAUUUUCACCG&CGGUGAUCCCGAUGGU	((((.....((((((&))))))......))))	CAAUCUUUAAUCAGUGUGUAACAUUAGGGAGGACUUGAAAGAGCCACCACAUUUUCACCGAGGCCACGCGGAGUACGAUCGAGUGUACAGUGAACAAUGCUAGGGAGAGCUGCCUAUAUGGAAGAGCCCUAAUGUGUAAAAUUAAUUUUAGUAGUGCUAUCCCCAUGUGAUUUUAAUAGCUUCUUAGGAGAAUGACAAAAAAAAAAAAAAAAAAAAAAAAAAAAAAAAA	GCGGUGAUCCCGAUGGUGUGAGC
NC_045512.2	101	113	108	113	4.17	hsa-miR-140-5p_MIMAT0000431	3	16	3	8	3.18	-7.64	-14.99	-0.896212	UAGGGAGAGCUGC&GUGGUUUUACCCUA	(((((((((((((&)))))))).)))))	CAAUCUUUAAUCAGUGUGUAACAUUAGGGAGGACUUGAAAGAGCCACCACAUUUUCACCGAGGCCACGCGGAGUACGAUCGAGUGUACAGUGAACAAUGCUAGGGAGAGCUGCCUAUAUGGAAGAGCCCUAAUGUGUAAAAUUAAUUUUAGUAGUGCUAUCCCCAUGUGAUUUUAAUAGCUUCUUAGGAGAAUGACAAAAAAAAAAAAAAAAAAAAAAAAAAAAAAAAA	CAGUGGUUUUACCCUAUGGUAG
NC_045512.2	60	73	66	71	5.99	hsa-miR-149-5p_MIMAT0000450	6	17	8	13	2.18	-7.64	-15.81	-0.891563	GAGGCCACGCGGAG&CUCCGUGUCUUC	((((..((((((((&))))))))))))	CAAUCUUUAAUCAGUGUGUAACAUUAGGGAGGACUUGAAAGAGCCACCACAUUUUCACCGAGGCCACGCGGAGUACGAUCGAGUGUACAGUGAACAAUGCUAGGGAGAGCUGCCUAUAUGGAAGAGCCCUAAUGUGUAAAAUUAAUUUUAGUAGUGCUAUCCCCAUGUGAUUUUAAUAGCUUCUUAGGAGAAUGACAAAAAAAAAAAAAAAAAAAAAAAAAAAAAAAAA	UCUGGCUCCGUGUCUUCACUCCC
NC_045512.2	34	46	40	45	2.89	hsa-miR-218-2-3p_MIMAT0004566	3	15	4	9	4.38	-7.64	-14.91	-0.896212	CUUGAAAGAGCCA&UGGUUCUGUCAAG	(((((.(((((((&))))))).)))))	CAAUCUUUAAUCAGUGUGUAACAUUAGGGAGGACUUGAAAGAGCCACCACAUUUUCACCGAGGCCACGCGGAGUACGAUCGAGUGUACAGUGAACAAUGCUAGGGAGAGCUGCCUAUAUGGAAGAGCCCUAAUGUGUAAAAUUAAUUUUAGUAGUGCUAUCCCCAUGUGAUUUUAAUAGCUUCUUAGGAGAAUGACAAAAAAAAAAAAAAAAAAAAAAAAAAAAAAAAA	CAUGGUUCUGUCAAGCACCGCG
NC_045512.2	108	113	108	113	1.44	hsa-miR-153-5p_MIMAT0026480	17	22	17	22	0.22	-7.63	-9.29	-0.895039	AGCUGC&GCAGCU	((((((&))))))	CAAUCUUUAAUCAGUGUGUAACAUUAGGGAGGACUUGAAAGAGCCACCACAUUUUCACCGAGGCCACGCGGAGUACGAUCGAGUGUACAGUGAACAAUGCUAGGGAGAGCUGCCUAUAUGGAAGAGCCCUAAUGUGUAAAAUUAAUUUUAGUAGUGCUAUCCCCAUGUGAUUUUAAUAGCUUCUUAGGAGAAUGACAAAAAAAAAAAAAAAAAAAAAAAAAAAAAAAAA	UCAUUUUUGUGAUGUUGCAGCU
NC_045512.2	150	163	153	158	3.15	hsa-miR-518c-5p_MIMAT0002847	9	22	13	18	4.18	-7.61	-14.94	-0.888063	AGUAGUGCUAUCCC&GGGAAGCACUUUCU	((.((((((.((((&))))))))))..))	CAAUCUUUAAUCAGUGUGUAACAUUAGGGAGGACUUGAAAGAGCCACCACAUUUUCACCGAGGCCACGCGGAGUACGAUCGAGUGUACAGUGAACAAUGCUAGGGAGAGCUGCCUAUAUGGAAGAGCCCUAAUGUGUAAAAUUAAUUUUAGUAGUGCUAUCCCCAUGUGAUUUUAAUAGCUUCUUAGGAGAAUGACAAAAAAAAAAAAAAAAAAAAAAAAAAAAAAAAA	UCUCUGGAGGGAAGCACUUUCUG
NC_045512.2	39	45	40	45	1.43	hsa-miR-125b-2-3p_MIMAT0004603	11	17	11	16	2.87	-7.6	-11.9	-0.89152	AAGAGCC&GGCUCUU	(((((((&)))))))	CAAUCUUUAAUCAGUGUGUAACAUUAGGGAGGACUUGAAAGAGCCACCACAUUUUCACCGAGGCCACGCGGAGUACGAUCGAGUGUACAGUGAACAAUGCUAGGGAGAGCUGCCUAUAUGGAAGAGCCCUAAUGUGUAAAAUUAAUUUUAGUAGUGCUAUCCCCAUGUGAUUUUAAUAGCUUCUUAGGAGAAUGACAAAAAAAAAAAAAAAAAAAAAAAAAAAAAAAAA	UCACAAGUCAGGCUCUUGGGAC
NC_045512.2	125	136	126	131	2.52	hsa-miR-937-5p_MIMAT0022938	7	18	12	17	2.82	-7.6	-12.94	-0.9016	AGCCCUAAUGUG&CAGGGUGGGGCU	(((((((...((&))...)))))))	CAAUCUUUAAUCAGUGUGUAACAUUAGGGAGGACUUGAAAGAGCCACCACAUUUUCACCGAGGCCACGCGGAGUACGAUCGAGUGUACAGUGAACAAUGCUAGGGAGAGCUGCCUAUAUGGAAGAGCCCUAAUGUGUAAAAUUAAUUUUAGUAGUGCUAUCCCCAUGUGAUUUUAAUAGCUUCUUAGGAGAAUGACAAAAAAAAAAAAAAAAAAAAAAAAAAAAAAAAA	GUGAGUCAGGGUGGGGCUGG
NC_045512.2	110	117	110	115	4.45	hsa-miR-3173-3p_MIMAT0015048	11	18	13	18	0.48	-7.57	-12.5	-0.888001	CUGCCUAU&AUAGGCAG	((((((((&))))))))	CAAUCUUUAAUCAGUGUGUAACAUUAGGGAGGACUUGAAAGAGCCACCACAUUUUCACCGAGGCCACGCGGAGUACGAUCGAGUGUACAGUGAACAAUGCUAGGGAGAGCUGCCUAUAUGGAAGAGCCCUAAUGUGUAAAAUUAAUUUUAGUAGUGCUAUCCCCAUGUGAUUUUAAUAGCUUCUUAGGAGAAUGACAAAAAAAAAAAAAAAAAAAAAAAAAAAAAAAAA	AAAGGAGGAAAUAGGCAGGCCA
NC_045512.2	125	130	125	130	2.41	hsa-miR-3158-3p_MIMAT0015032	2	7	2	7	0.19	-7.57	-10.17	-0.888001	AGCCCU&AGGGCU	((((((&))))))	CAAUCUUUAAUCAGUGUGUAACAUUAGGGAGGACUUGAAAGAGCCACCACAUUUUCACCGAGGCCACGCGGAGUACGAUCGAGUGUACAGUGAACAAUGCUAGGGAGAGCUGCCUAUAUGGAAGAGCCCUAAUGUGUAAAAUUAAUUUUAGUAGUGCUAUCCCCAUGUGAUUUUAAUAGCUUCUUAGGAGAAUGACAAAAAAAAAAAAAAAAAAAAAAAAAAAAAAAAA	AAGGGCUUCCUCUCUGCAGGAC
NC_045512.2	68	78	68	73	3.28	hsa-miR-454-5p_MIMAT0003884	13	22	17	22	0.04	-7.54	-10.86	-0.884482	GCGGAGUACGA&UUGUCUCUGC	((((((.((((&))))))))))	CAAUCUUUAAUCAGUGUGUAACAUUAGGGAGGACUUGAAAGAGCCACCACAUUUUCACCGAGGCCACGCGGAGUACGAUCGAGUGUACAGUGAACAAUGCUAGGGAGAGCUGCCUAUAUGGAAGAGCCCUAAUGUGUAAAAUUAAUUUUAGUAGUGCUAUCCCCAUGUGAUUUUAAUAGCUUCUUAGGAGAAUGACAAAAAAAAAAAAAAAAAAAAAAAAAAAAAAAAA	ACCCUAUCAAUAUUGUCUCUGC
NC_045512.2	125	136	125	130	2.52	hsa-miR-107_MIMAT0000104	3	19	14	19	1.67	-7.53	-11.72	-0.878727	AGCCCUAAUGUG&CAGCAUUGUACAGGGCU	((((((((((((&)).))))....))))))	CAAUCUUUAAUCAGUGUGUAACAUUAGGGAGGACUUGAAAGAGCCACCACAUUUUCACCGAGGCCACGCGGAGUACGAUCGAGUGUACAGUGAACAAUGCUAGGGAGAGCUGCCUAUAUGGAAGAGCCCUAAUGUGUAAAAUUAAUUUUAGUAGUGCUAUCCCCAUGUGAUUUUAAUAGCUUCUUAGGAGAAUGACAAAAAAAAAAAAAAAAAAAAAAAAAAAAAAAAA	AGCAGCAUUGUACAGGGCUAUCA
NC_045512.2	120	139	134	139	3.81	hsa-miR-92b-3p_MIMAT0003218	3	22	3	8	0.46	-7.53	-11.8	-0.883309	GGAAGAGCCCUAAUGUGUAA&UUGCACUCGUCCCGGCCUCC	((.((.(((.....((((((&)))))).......)))))))	CAAUCUUUAAUCAGUGUGUAACAUUAGGGAGGACUUGAAAGAGCCACCACAUUUUCACCGAGGCCACGCGGAGUACGAUCGAGUGUACAGUGAACAAUGCUAGGGAGAGCUGCCUAUAUGGAAGAGCCCUAAUGUGUAAAAUUAAUUUUAGUAGUGCUAUCCCCAUGUGAUUUUAAUAGCUUCUUAGGAGAAUGACAAAAAAAAAAAAAAAAAAAAAAAAAAAAAAAAA	UAUUGCACUCGUCCCGGCCUCC
NC_045512.2	68	80	68	73	3.42	hsa-miR-370-5p_MIMAT0026483	3	16	11	16	1.12	-7.5	-12.04	-0.87979	GCGGAGUACGAUC&GGUCACGUCUCUGC	((((((.((((((&))))..))))))))	CAAUCUUUAAUCAGUGUGUAACAUUAGGGAGGACUUGAAAGAGCCACCACAUUUUCACCGAGGCCACGCGGAGUACGAUCGAGUGUACAGUGAACAAUGCUAGGGAGAGCUGCCUAUAUGGAAGAGCCCUAAUGUGUAAAAUUAAUUUUAGUAGUGCUAUCCCCAUGUGAUUUUAAUAGCUUCUUAGGAGAAUGACAAAAAAAAAAAAAAAAAAAAAAAAAAAAAAAAA	CAGGUCACGUCUCUGCAGUUAC
NC_045512.2	135	152	136	141	2.37	hsa-miR-548e-3p_MIMAT0005874	5	22	16	21	0.26	-7.49	-10.12	-0.878617	UGUAAAAUUAAUUUUAGU&ACUGAGACUACUUUUGCA	(((((((.((.(((((((&))))))).)).)))))))	CAAUCUUUAAUCAGUGUGUAACAUUAGGGAGGACUUGAAAGAGCCACCACAUUUUCACCGAGGCCACGCGGAGUACGAUCGAGUGUACAGUGAACAAUGCUAGGGAGAGCUGCCUAUAUGGAAGAGCCCUAAUGUGUAAAAUUAAUUUUAGUAGUGCUAUCCCCAUGUGAUUUUAAUAGCUUCUUAGGAGAAUGACAAAAAAAAAAAAAAAAAAAAAAAAAAAAAAAAA	AAAAACUGAGACUACUUUUGCA
NC_045512.2	13	20	13	18	1.66	hsa-miR-4761-3p_MIMAT0019909	8	15	10	15	0.15	-7.47	-9.28	-0.881079	AGUGUGUA&UGCGCACU	((((((((&))))))))	CAAUCUUUAAUCAGUGUGUAACAUUAGGGAGGACUUGAAAGAGCCACCACAUUUUCACCGAGGCCACGCGGAGUACGAUCGAGUGUACAGUGAACAAUGCUAGGGAGAGCUGCCUAUAUGGAAGAGCCCUAAUGUGUAAAAUUAAUUUUAGUAGUGCUAUCCCCAUGUGAUUUUAAUAGCUUCUUAGGAGAAUGACAAAAAAAAAAAAAAAAAAAAAAAAAAAAAAAAA	GAGGGCAUGCGCACUUUGUCC
NC_045512.2	153	170	153	158	4.64	hsa-miR-520a-5p_MIMAT0002833	2	17	12	17	3.28	-7.47	-15.39	-0.881079	AGUGCUAUCCCCAUGUGA&UCCAGAGGGAAGUACU	((((((.((((..((.((&))))..))))))))))	CAAUCUUUAAUCAGUGUGUAACAUUAGGGAGGACUUGAAAGAGCCACCACAUUUUCACCGAGGCCACGCGGAGUACGAUCGAGUGUACAGUGAACAAUGCUAGGGAGAGCUGCCUAUAUGGAAGAGCCCUAAUGUGUAAAAUUAAUUUUAGUAGUGCUAUCCCCAUGUGAUUUUAAUAGCUUCUUAGGAGAAUGACAAAAAAAAAAAAAAAAAAAAAAAAAAAAAAAAA	CUCCAGAGGGAAGUACUUUCU
NC_045512.2	113	130	125	130	6.06	hsa-miR-3127-5p_MIMAT0014990	4	20	4	9	0.83	-7.46	-14.35	-0.870558	CCUAUAUGGAAGAGCCCU&AGGGCUUGUGGAAUGGG	(((((.......((((((&))))))......)))))	CAAUCUUUAAUCAGUGUGUAACAUUAGGGAGGACUUGAAAGAGCCACCACAUUUUCACCGAGGCCACGCGGAGUACGAUCGAGUGUACAGUGAACAAUGCUAGGGAGAGCUGCCUAUAUGGAAGAGCCCUAAUGUGUAAAAUUAAUUUUAGUAGUGCUAUCCCCAUGUGAUUUUAAUAGCUUCUUAGGAGAAUGACAAAAAAAAAAAAAAAAAAAAAAAAAAAAAAAAA	AUCAGGGCUUGUGGAAUGGGAAG
NC_045512.2	3	20	14	19	2.58	hsa-miR-3939_MIMAT0018355	1	19	2	7	1.68	-7.44	-11.7	-0.872751	AUCUUUAAUCAGUGUGUA&UACGCGCAGACCACAGGAU	(((((...((.(((((((&))))))).))....)))))	CAAUCUUUAAUCAGUGUGUAACAUUAGGGAGGACUUGAAAGAGCCACCACAUUUUCACCGAGGCCACGCGGAGUACGAUCGAGUGUACAGUGAACAAUGCUAGGGAGAGCUGCCUAUAUGGAAGAGCCCUAAUGUGUAAAAUUAAUUUUAGUAGUGCUAUCCCCAUGUGAUUUUAAUAGCUUCUUAGGAGAAUGACAAAAAAAAAAAAAAAAAAAAAAAAAAAAAAAAA	UACGCGCAGACCACAGGAUGUC
NC_045512.2	82	92	87	92	3.08	hsa-miR-130a-5p_MIMAT0004593	11	22	11	16	0.88	-7.43	-11.39	-0.871578	AGUGUACAGUG&CAUUGUGCUACU	(((((((((((&)))))))).)))	CAAUCUUUAAUCAGUGUGUAACAUUAGGGAGGACUUGAAAGAGCCACCACAUUUUCACCGAGGCCACGCGGAGUACGAUCGAGUGUACAGUGAACAAUGCUAGGGAGAGCUGCCUAUAUGGAAGAGCCCUAAUGUGUAAAAUUAAUUUUAGUAGUGCUAUCCCCAUGUGAUUUUAAUAGCUUCUUAGGAGAAUGACAAAAAAAAAAAAAAAAAAAAAAAAAAAAAAAAA	GCUCUUUUCACAUUGUGCUACU
NC_045512.2	120	136	131	136	3.7	hsa-miR-323a-3p_MIMAT0000755	1	18	1	6	0.61	-7.42	-11.73	-0.875181	GGAAGAGCCCUAAUGUG&CACAUUACACGGUCGACC	((..((.((.(((((((&)))))))...))))..))	CAAUCUUUAAUCAGUGUGUAACAUUAGGGAGGACUUGAAAGAGCCACCACAUUUUCACCGAGGCCACGCGGAGUACGAUCGAGUGUACAGUGAACAAUGCUAGGGAGAGCUGCCUAUAUGGAAGAGCCCUAAUGUGUAAAAUUAAUUUUAGUAGUGCUAUCCCCAUGUGAUUUUAAUAGCUUCUUAGGAGAAUGACAAAAAAAAAAAAAAAAAAAAAAAAAAAAAAAAA	CACAUUACACGGUCGACCUCU
NC_045512.2	71	81	76	81	3.29	hsa-miR-323a-3p_MIMAT0000755	10	20	10	15	0.6	-7.42	-11.31	-0.875181	GAGUACGAUCG&CGGUCGACCUC	(((..((((((&))))))..)))	CAAUCUUUAAUCAGUGUGUAACAUUAGGGAGGACUUGAAAGAGCCACCACAUUUUCACCGAGGCCACGCGGAGUACGAUCGAGUGUACAGUGAACAAUGCUAGGGAGAGCUGCCUAUAUGGAAGAGCCCUAAUGUGUAAAAUUAAUUUUAGUAGUGCUAUCCCCAUGUGAUUUUAAUAGCUUCUUAGGAGAAUGACAAAAAAAAAAAAAAAAAAAAAAAAAAAAAAAAA	CACAUUACACGGUCGACCUCU
NC_045512.2	123	139	123	128	3.48	hsa-miR-493-5p_MIMAT0002813	1	18	13	18	0.58	-7.42	-11.48	-0.870405	AGAGCCCUAAUGUGUAA&UUGUACAUGGUAGGCUUU	((((((...((((((((&))))))))....))))))	CAAUCUUUAAUCAGUGUGUAACAUUAGGGAGGACUUGAAAGAGCCACCACAUUUUCACCGAGGCCACGCGGAGUACGAUCGAGUGUACAGUGAACAAUGCUAGGGAGAGCUGCCUAUAUGGAAGAGCCCUAAUGUGUAAAAUUAAUUUUAGUAGUGCUAUCCCCAUGUGAUUUUAAUAGCUUCUUAGGAGAAUGACAAAAAAAAAAAAAAAAAAAAAAAAAAAAAAAAA	UUGUACAUGGUAGGCUUUCAUU
NC_045512.2	47	65	51	56	5.91	hsa-miR-664b-5p_MIMAT0022271	2	21	10	15	1.28	-7.41	-14.6	-0.86045	CCACAUUUUCACCGAGGCC&GGGCUAAGGGAGAUGAUUGG	((((((((((....((.((&)).))...)))))))..)))	CAAUCUUUAAUCAGUGUGUAACAUUAGGGAGGACUUGAAAGAGCCACCACAUUUUCACCGAGGCCACGCGGAGUACGAUCGAGUGUACAGUGAACAAUGCUAGGGAGAGCUGCCUAUAUGGAAGAGCCCUAAUGUGUAAAAUUAAUUUUAGUAGUGCUAUCCCCAUGUGAUUUUAAUAGCUUCUUAGGAGAAUGACAAAAAAAAAAAAAAAAAAAAAAAAAAAAAAAAA	UGGGCUAAGGGAGAUGAUUGGGUA
NC_045512.2	163	169	164	169	2.72	hsa-miR-942-3p_MIMAT0026734	1	7	1	6	0.19	-7.41	-10.32	-0.869232	CCAUGUG&CACAUGG	(((((((&)))))))	CAAUCUUUAAUCAGUGUGUAACAUUAGGGAGGACUUGAAAGAGCCACCACAUUUUCACCGAGGCCACGCGGAGUACGAUCGAGUGUACAGUGAACAAUGCUAGGGAGAGCUGCCUAUAUGGAAGAGCCCUAAUGUGUAAAAUUAAUUUUAGUAGUGCUAUCCCCAUGUGAUUUUAAUAGCUUCUUAGGAGAAUGACAAAAAAAAAAAAAAAAAAAAAAAAAAAAAAAAA	CACAUGGCCGAAACAGAGAAGU
NC_045512.2	145	163	145	150	3.24	hsa-miR-5187-5p_MIMAT0021117	2	19	14	19	0.09	-7.39	-10.72	-0.866886	AUUUUAGUAGUGCUAUCCC&GGGAUGAGGGAUUGAAGU	((((((((....((.((((&))))..))..))))))))	CAAUCUUUAAUCAGUGUGUAACAUUAGGGAGGACUUGAAAGAGCCACCACAUUUUCACCGAGGCCACGCGGAGUACGAUCGAGUGUACAGUGAACAAUGCUAGGGAGAGCUGCCUAUAUGGAAGAGCCCUAAUGUGUAAAAUUAAUUUUAGUAGUGCUAUCCCCAUGUGAUUUUAAUAGCUUCUUAGGAGAAUGACAAAAAAAAAAAAAAAAAAAAAAAAAAAAAAAAA	UGGGAUGAGGGAUUGAAGUGGA
NC_045512.2	112	122	112	117	4.15	hsa-miR-26a-5p_MIMAT0000082	10	21	16	21	0.79	-7.38	-12.32	-0.865713	GCCUAUAUGGA&UCCAGGAUAGGC	((((((.((((&))))..))))))	CAAUCUUUAAUCAGUGUGUAACAUUAGGGAGGACUUGAAAGAGCCACCACAUUUUCACCGAGGCCACGCGGAGUACGAUCGAGUGUACAGUGAACAAUGCUAGGGAGAGCUGCCUAUAUGGAAGAGCCCUAAUGUGUAAAAUUAAUUUUAGUAGUGCUAUCCCCAUGUGAUUUUAAUAGCUUCUUAGGAGAAUGACAAAAAAAAAAAAAAAAAAAAAAAAAAAAAAAAA	UUCAAGUAAUCCAGGAUAGGCU
NC_045512.2	84	92	84	89	2.77	hsa-miR-107_MIMAT0000104	6	14	9	14	1	-7.37	-11.14	-0.860055	UGUACAGUG&CAUUGUACA	(((((((((&)))))))))	CAAUCUUUAAUCAGUGUGUAACAUUAGGGAGGACUUGAAAGAGCCACCACAUUUUCACCGAGGCCACGCGGAGUACGAUCGAGUGUACAGUGAACAAUGCUAGGGAGAGCUGCCUAUAUGGAAGAGCCCUAAUGUGUAAAAUUAAUUUUAGUAGUGCUAUCCCCAUGUGAUUUUAAUAGCUUCUUAGGAGAAUGACAAAAAAAAAAAAAAAAAAAAAAAAAAAAAAAAA	AGCAGCAUUGUACAGGGCUAUCA
NC_045512.2	125	136	125	130	2.52	hsa-miR-103a-3p_MIMAT0000101	3	19	14	19	1.84	-7.36	-11.72	-0.858888	AGCCCUAAUGUG&CAGCAUUGUACAGGGCU	((((((((((((&)).))))....))))))	CAAUCUUUAAUCAGUGUGUAACAUUAGGGAGGACUUGAAAGAGCCACCACAUUUUCACCGAGGCCACGCGGAGUACGAUCGAGUGUACAGUGAACAAUGCUAGGGAGAGCUGCCUAUAUGGAAGAGCCCUAAUGUGUAAAAUUAAUUUUAGUAGUGCUAUCCCCAUGUGAUUUUAAUAGCUUCUUAGGAGAAUGACAAAAAAAAAAAAAAAAAAAAAAAAAAAAAAAAA	AGCAGCAUUGUACAGGGCUAUGA
NC_045512.2	162	171	162	167	2.96	hsa-miR-1912-5p_MIMAT0037333	4	13	8	13	2.85	-7.36	-13.17	-0.863367	CCCAUGUGAU&AUUGCAUGGG	((((((((((&))))))))))	CAAUCUUUAAUCAGUGUGUAACAUUAGGGAGGACUUGAAAGAGCCACCACAUUUUCACCGAGGCCACGCGGAGUACGAUCGAGUGUACAGUGAACAAUGCUAGGGAGAGCUGCCUAUAUGGAAGAGCCCUAAUGUGUAAAAUUAAUUUUAGUAGUGCUAUCCCCAUGUGAUUUUAAUAGCUUCUUAGGAGAAUGACAAAAAAAAAAAAAAAAAAAAAAAAAAAAAAAAA	CUCAUUGCAUGGGCUGUGUAUA
NC_045512.2	125	134	126	131	2.51	hsa-miR-194-3p_MIMAT0004671	2	11	5	10	3.11	-7.34	-12.96	-0.861021	AGCCCUAAUG&CAGUGGGGCU	(((((((.((&)).)))))))	CAAUCUUUAAUCAGUGUGUAACAUUAGGGAGGACUUGAAAGAGCCACCACAUUUUCACCGAGGCCACGCGGAGUACGAUCGAGUGUACAGUGAACAAUGCUAGGGAGAGCUGCCUAUAUGGAAGAGCCCUAAUGUGUAAAAUUAAUUUUAGUAGUGCUAUCCCCAUGUGAUUUUAAUAGCUUCUUAGGAGAAUGACAAAAAAAAAAAAAAAAAAAAAAAAAAAAAAAAA	CCAGUGGGGCUGCUGUUAUCUG
NC_045512.2	178	197	179	184	5.12	hsa-miR-339-5p_MIMAT0000764	5	19	13	18	4.41	-7.34	-16.87	-0.856554	AGCUUCUUAGGAGAAUGACA&UGUCCUCCAGGAGCU	(((((((..((((...((((&)))))))))))))))	CAAUCUUUAAUCAGUGUGUAACAUUAGGGAGGACUUGAAAGAGCCACCACAUUUUCACCGAGGCCACGCGGAGUACGAUCGAGUGUACAGUGAACAAUGCUAGGGAGAGCUGCCUAUAUGGAAGAGCCCUAAUGUGUAAAAUUAAUUUUAGUAGUGCUAUCCCCAUGUGAUUUUAAUAGCUUCUUAGGAGAAUGACAAAAAAAAAAAAAAAAAAAAAAAAAAAAAAAAA	UCCCUGUCCUCCAGGAGCUCACG
NC_045512.2	103	126	120	125	10.53	hsa-miR-7111-3p_MIMAT0028120	6	20	7	12	0.01	-7.34	-17.88	-0.861021	GGGAGAGCUGCCUAUAUGGAAGAG&CUCUUCCCUCCUCCC	(((((((..........(((((((&))))))))).)))))	CAAUCUUUAAUCAGUGUGUAACAUUAGGGAGGACUUGAAAGAGCCACCACAUUUUCACCGAGGCCACGCGGAGUACGAUCGAGUGUACAGUGAACAAUGCUAGGGAGAGCUGCCUAUAUGGAAGAGCCCUAAUGUGUAAAAUUAAUUUUAGUAGUGCUAUCCCCAUGUGAUUUUAAUAGCUUCUUAGGAGAAUGACAAAAAAAAAAAAAAAAAAAAAAAAAAAAAAAAA	AUCCUCUCUUCCCUCCUCCCAG
NC_045512.2	162	167	162	167	2.08	hsa-miR-202-3p_MIMAT0002811	13	18	13	18	0.15	-7.31	-9.54	-0.867197	CCCAUG&CAUGGG	((((((&))))))	CAAUCUUUAAUCAGUGUGUAACAUUAGGGAGGACUUGAAAGAGCCACCACAUUUUCACCGAGGCCACGCGGAGUACGAUCGAGUGUACAGUGAACAAUGCUAGGGAGAGCUGCCUAUAUGGAAGAGCCCUAAUGUGUAAAAUUAAUUUUAGUAGUGCUAUCCCCAUGUGAUUUUAAUAGCUUCUUAGGAGAAUGACAAAAAAAAAAAAAAAAAAAAAAAAAAAAAAAAA	AGAGGUAUAGGGCAUGGGAA
NC_045512.2	70	88	83	88	5.57	hsa-miR-139-5p_MIMAT0000250	7	20	7	12	0.52	-7.3	-13.39	-0.851887	GGAGUACGAUCGAGUGUAC&GUGCACGUGUCUCC	((((.((......((((((&))))))..))))))	CAAUCUUUAAUCAGUGUGUAACAUUAGGGAGGACUUGAAAGAGCCACCACAUUUUCACCGAGGCCACGCGGAGUACGAUCGAGUGUACAGUGAACAAUGCUAGGGAGAGCUGCCUAUAUGGAAGAGCCCUAAUGUGUAAAAUUAAUUUUAGUAGUGCUAUCCCCAUGUGAUUUUAAUAGCUUCUUAGGAGAAUGACAAAAAAAAAAAAAAAAAAAAAAAAAAAAAAAAA	UCUACAGUGCACGUGUCUCCAGU
NC_045512.2	26	33	27	32	3.93	hsa-miR-3059-5p_MIMAT0048633	3	10	4	9	0.29	-7.28	-11.5	-0.845354	AGGGAGGA&UCCUCUCU	((((((((&))))))))	CAAUCUUUAAUCAGUGUGUAACAUUAGGGAGGACUUGAAAGAGCCACCACAUUUUCACCGAGGCCACGCGGAGUACGAUCGAGUGUACAGUGAACAAUGCUAGGGAGAGCUGCCUAUAUGGAAGAGCCCUAAUGUGUAAAAUUAAUUUUAGUAGUGCUAUCCCCAUGUGAUUUUAAUAGCUUCUUAGGAGAAUGACAAAAAAAAAAAAAAAAAAAAAAAAAAAAAAAAA	UUUCCUCUCUGCCCCAUAGGGUGU
NC_045512.2	125	138	125	130	2.55	hsa-miR-504-3p_MIMAT0026612	6	19	14	19	1.25	-7.28	-11.08	-0.858668	AGCCCUAAUGUGUA&UGCAGGGCAGGGUU	((((((....((((&))))....))))))	CAAUCUUUAAUCAGUGUGUAACAUUAGGGAGGACUUGAAAGAGCCACCACAUUUUCACCGAGGCCACGCGGAGUACGAUCGAGUGUACAGUGAACAAUGCUAGGGAGAGCUGCCUAUAUGGAAGAGCCCUAAUGUGUAAAAUUAAUUUUAGUAGUGCUAUCCCCAUGUGAUUUUAAUAGCUUCUUAGGAGAAUGACAAAAAAAAAAAAAAAAAAAAAAAAAAAAAAAAA	GGGAGUGCAGGGCAGGGUUUC
NC_045512.2	104	111	105	110	4.02	hsa-let-7c-3p_MIMAT0026472	15	22	16	21	0.04	-7.27	-11.33	-0.852809	GGAGAGCU&AGCUUUCC	((((((((&))))))))	CAAUCUUUAAUCAGUGUGUAACAUUAGGGAGGACUUGAAAGAGCCACCACAUUUUCACCGAGGCCACGCGGAGUACGAUCGAGUGUACAGUGAACAAUGCUAGGGAGAGCUGCCUAUAUGGAAGAGCCCUAAUGUGUAAAAUUAAUUUUAGUAGUGCUAUCCCCAUGUGAUUUUAAUAGCUUCUUAGGAGAAUGACAAAAAAAAAAAAAAAAAAAAAAAAAAAAAAAAA	CUGUACAACCUUCUAGCUUUCC
NC_045512.2	63	78	70	75	4.17	hsa-miR-550a-3p_MIMAT0003257	3	18	6	11	2.33	-7.26	-13.76	-0.851636	GCCACGCGGAGUACGA&UCUUACUCCCUCAGGC	(((....((((((.((&)).))))))....)))	CAAUCUUUAAUCAGUGUGUAACAUUAGGGAGGACUUGAAAGAGCCACCACAUUUUCACCGAGGCCACGCGGAGUACGAUCGAGUGUACAGUGAACAAUGCUAGGGAGAGCUGCCUAUAUGGAAGAGCCCUAAUGUGUAAAAUUAAUUUUAGUAGUGCUAUCCCCAUGUGAUUUUAAUAGCUUCUUAGGAGAAUGACAAAAAAAAAAAAAAAAAAAAAAAAAAAAAAAAA	UGUCUUACUCCCUCAGGCACAU
NC_045512.2	123	129	124	129	3.02	hsa-miR-3940-5p_MIMAT0019229	13	19	13	18	3.22	-7.25	-13.49	-0.860079	AGAGCCC&GGGCUCU	(((((((&)))))))	CAAUCUUUAAUCAGUGUGUAACAUUAGGGAGGACUUGAAAGAGCCACCACAUUUUCACCGAGGCCACGCGGAGUACGAUCGAGUGUACAGUGAACAAUGCUAGGGAGAGCUGCCUAUAUGGAAGAGCCCUAAUGUGUAAAAUUAAUUUUAGUAGUGCUAUCCCCAUGUGAUUUUAAUAGCUUCUUAGGAGAAUGACAAAAAAAAAAAAAAAAAAAAAAAAAAAAAAAAA	GUGGGUUGGGGCGGGCUCUG
NC_045512.2	62	75	68	73	4.17	hsa-miR-511-5p_MIMAT0002808	9	20	11	16	1.4	-7.25	-12.82	-0.85513	GGCCACGCGGAGUA&UGCUCUGCAGUC	(((...((((((((&)))))))).)))	CAAUCUUUAAUCAGUGUGUAACAUUAGGGAGGACUUGAAAGAGCCACCACAUUUUCACCGAGGCCACGCGGAGUACGAUCGAGUGUACAGUGAACAAUGCUAGGGAGAGCUGCCUAUAUGGAAGAGCCCUAAUGUGUAAAAUUAAUUUUAGUAGUGCUAUCCCCAUGUGAUUUUAAUAGCUUCUUAGGAGAAUGACAAAAAAAAAAAAAAAAAAAAAAAAAAAAAAAAA	GUGUCUUUUGCUCUGCAGUCA
NC_045512.2	163	187	182	187	6.41	hsa-miR-3200-5p_MIMAT0017392	4	21	4	9	0.86	-7.24	-14.51	-0.84929	CCAUGUGAUUUUAAUAGCUUCUUAG&CUGAGAAGGCGCACAAGG	((.((((..........((((((((&))))))))...)))).))	CAAUCUUUAAUCAGUGUGUAACAUUAGGGAGGACUUGAAAGAGCCACCACAUUUUCACCGAGGCCACGCGGAGUACGAUCGAGUGUACAGUGAACAAUGCUAGGGAGAGCUGCCUAUAUGGAAGAGCCCUAAUGUGUAAAAUUAAUUUUAGUAGUGCUAUCCCCAUGUGAUUUUAAUAGCUUCUUAGGAGAAUGACAAAAAAAAAAAAAAAAAAAAAAAAAAAAAAAAA	AAUCUGAGAAGGCGCACAAGGU
NC_045512.2	62	76	66	71	4.17	hsa-miR-493-3p_MIMAT0003161	6	19	11	16	2.3	-7.24	-13.71	-0.84929	GGCCACGCGGAGUAC&GUCUACUGUGUGCC	(((.((((((((.((&)))).)))))))))	CAAUCUUUAAUCAGUGUGUAACAUUAGGGAGGACUUGAAAGAGCCACCACAUUUUCACCGAGGCCACGCGGAGUACGAUCGAGUGUACAGUGAACAAUGCUAGGGAGAGCUGCCUAUAUGGAAGAGCCCUAAUGUGUAAAAUUAAUUUUAGUAGUGCUAUCCCCAUGUGAUUUUAAUAGCUUCUUAGGAGAAUGACAAAAAAAAAAAAAAAAAAAAAAAAAAAAAAAAA	UGAAGGUCUACUGUGUGCCAGG
NC_045512.2	84	92	84	89	2.77	hsa-miR-103a-3p_MIMAT0000101	6	14	9	14	1.19	-7.23	-11.19	-0.843718	UGUACAGUG&CAUUGUACA	(((((((((&)))))))))	CAAUCUUUAAUCAGUGUGUAACAUUAGGGAGGACUUGAAAGAGCCACCACAUUUUCACCGAGGCCACGCGGAGUACGAUCGAGUGUACAGUGAACAAUGCUAGGGAGAGCUGCCUAUAUGGAAGAGCCCUAAUGUGUAAAAUUAAUUUUAGUAGUGCUAUCCCCAUGUGAUUUUAAUAGCUUCUUAGGAGAAUGACAAAAAAAAAAAAAAAAAAAAAAAAAAAAAAAAA	AGCAGCAUUGUACAGGGCUAUGA
NC_045512.2	90	103	98	103	4.26	hsa-miR-3126-3p_MIMAT0015377	4	17	4	9	2.89	-7.23	-14.38	-0.848117	GUGAACAAUGCUAG&CUGGCAUCCGUCAC	((((...(((((((&)))))))...))))	CAAUCUUUAAUCAGUGUGUAACAUUAGGGAGGACUUGAAAGAGCCACCACAUUUUCACCGAGGCCACGCGGAGUACGAUCGAGUGUACAGUGAACAAUGCUAGGGAGAGCUGCCUAUAUGGAAGAGCCCUAAUGUGUAAAAUUAAUUUUAGUAGUGCUAUCCCCAUGUGAUUUUAAUAGCUUCUUAGGAGAAUGACAAAAAAAAAAAAAAAAAAAAAAAAAAAAAAAAA	CAUCUGGCAUCCGUCACACAGA
NC_045512.2	155	169	164	169	4.56	hsa-miR-188-3p_MIMAT0004613	5	21	5	10	3.29	-7.22	-15.07	-0.851591	UGCUAUCCCCAUGUG&CACAUGCAGGGUUUGCA	(((...(((((((((&))))))..)))...)))	CAAUCUUUAAUCAGUGUGUAACAUUAGGGAGGACUUGAAAGAGCCACCACAUUUUCACCGAGGCCACGCGGAGUACGAUCGAGUGUACAGUGAACAAUGCUAGGGAGAGCUGCCUAUAUGGAAGAGCCCUAAUGUGUAAAAUUAAUUUUAGUAGUGCUAUCCCCAUGUGAUUUUAAUAGCUUCUUAGGAGAAUGACAAAAAAAAAAAAAAAAAAAAAAAAAAAAAAAAA	CUCCCACAUGCAGGGUUUGCA
NC_045512.2	60	72	67	72	4.11	hsa-miR-937-3p_MIMAT0004980	2	16	2	7	0.75	-7.21	-12.07	-0.845771	GAGGCCACGCGGA&UCCGCGCUCUGACUC	(((....((((((&))))))......)))	CAAUCUUUAAUCAGUGUGUAACAUUAGGGAGGACUUGAAAGAGCCACCACAUUUUCACCGAGGCCACGCGGAGUACGAUCGAGUGUACAGUGAACAAUGCUAGGGAGAGCUGCCUAUAUGGAAGAGCCCUAAUGUGUAAAAUUAAUUUUAGUAGUGCUAUCCCCAUGUGAUUUUAAUAGCUUCUUAGGAGAAUGACAAAAAAAAAAAAAAAAAAAAAAAAAAAAAAAAA	AUCCGCGCUCUGACUCUCUGCC
NC_045512.2	187	200	195	200	3.16	hsa-miR-5010-3p_MIMAT0021044	1	12	1	6	0.14	-7.18	-10.48	-0.842252	GGAGAAUGACAAAA&UUUUGUGUCUCC	(((((...((((((&)))))).)))))	CAAUCUUUAAUCAGUGUGUAACAUUAGGGAGGACUUGAAAGAGCCACCACAUUUUCACCGAGGCCACGCGGAGUACGAUCGAGUGUACAGUGAACAAUGCUAGGGAGAGCUGCCUAUAUGGAAGAGCCCUAAUGUGUAAAAUUAAUUUUAGUAGUGCUAUCCCCAUGUGAUUUUAAUAGCUUCUUAGGAGAAUGACAAAAAAAAAAAAAAAAAAAAAAAAAAAAAAAAA	UUUUGUGUCUCCCAUUCCCCAG
NC_045512.2	159	171	166	171	3.87	hsa-miR-23a-3p_MIMAT0000078	1	17	1	6	0.51	-7.17	-11.55	-0.845694	AUCCCCAUGUGAU&AUCACAUUGCCAGGGAU	(((((((((((((&)))))).))...)))))	CAAUCUUUAAUCAGUGUGUAACAUUAGGGAGGACUUGAAAGAGCCACCACAUUUUCACCGAGGCCACGCGGAGUACGAUCGAGUGUACAGUGAACAAUGCUAGGGAGAGCUGCCUAUAUGGAAGAGCCCUAAUGUGUAAAAUUAAUUUUAGUAGUGCUAUCCCCAUGUGAUUUUAAUAGCUUCUUAGGAGAAUGACAAAAAAAAAAAAAAAAAAAAAAAAAAAAAAAAA	AUCACAUUGCCAGGGAUUUCC
NC_045512.2	150	168	163	168	4.56	hsa-miR-302a-5p_MIMAT0000683	7	23	7	12	0.84	-7.17	-12.57	-0.836716	AGUAGUGCUAUCCCCAUGU&ACGUGGAUGUACUUGCU	((((((((.....((((((&))))))..)))).))))	CAAUCUUUAAUCAGUGUGUAACAUUAGGGAGGACUUGAAAGAGCCACCACAUUUUCACCGAGGCCACGCGGAGUACGAUCGAGUGUACAGUGAACAAUGCUAGGGAGAGCUGCCUAUAUGGAAGAGCCCUAAUGUGUAAAAUUAAUUUUAGUAGUGCUAUCCCCAUGUGAUUUUAAUAGCUUCUUAGGAGAAUGACAAAAAAAAAAAAAAAAAAAAAAAAAAAAAAAAA	ACUUAAACGUGGAUGUACUUGCU
NC_045512.2	150	163	153	158	3.15	hsa-miR-523-5p_MIMAT0005449	8	21	12	17	4.27	-7.17	-14.59	-0.841079	AGUAGUGCUAUCCC&GGGAAGCGCUUUCU	((.((((((.((((&))))))))))..))	CAAUCUUUAAUCAGUGUGUAACAUUAGGGAGGACUUGAAAGAGCCACCACAUUUUCACCGAGGCCACGCGGAGUACGAUCGAGUGUACAGUGAACAAUGCUAGGGAGAGCUGCCUAUAUGGAAGAGCCCUAAUGUGUAAAAUUAAUUUUAGUAGUGCUAUCCCCAUGUGAUUUUAAUAGCUUCUUAGGAGAAUGACAAAAAAAAAAAAAAAAAAAAAAAAAAAAAAAAA	CUCUAGAGGGAAGCGCUUUCUG
NC_045512.2	150	163	153	158	3.15	hsa-miR-522-5p_MIMAT0005451	8	21	12	17	4.27	-7.17	-14.59	-0.841079	AGUAGUGCUAUCCC&GGGAAGCGCUUUCU	((.((((((.((((&))))))))))..))	CAAUCUUUAAUCAGUGUGUAACAUUAGGGAGGACUUGAAAGAGCCACCACAUUUUCACCGAGGCCACGCGGAGUACGAUCGAGUGUACAGUGAACAAUGCUAGGGAGAGCUGCCUAUAUGGAAGAGCCCUAAUGUGUAAAAUUAAUUUUAGUAGUGCUAUCCCCAUGUGAUUUUAAUAGCUUCUUAGGAGAAUGACAAAAAAAAAAAAAAAAAAAAAAAAAAAAAAAAA	CUCUAGAGGGAAGCGCUUUCUG
NC_045512.2	150	163	153	158	3.15	hsa-miR-518e-5p_MIMAT0005450	8	21	12	17	4.27	-7.17	-14.59	-0.841079	AGUAGUGCUAUCCC&GGGAAGCGCUUUCU	((.((((((.((((&))))))))))..))	CAAUCUUUAAUCAGUGUGUAACAUUAGGGAGGACUUGAAAGAGCCACCACAUUUUCACCGAGGCCACGCGGAGUACGAUCGAGUGUACAGUGAACAAUGCUAGGGAGAGCUGCCUAUAUGGAAGAGCCCUAAUGUGUAAAAUUAAUUUUAGUAGUGCUAUCCCCAUGUGAUUUUAAUAGCUUCUUAGGAGAAUGACAAAAAAAAAAAAAAAAAAAAAAAAAAAAAAAAA	CUCUAGAGGGAAGCGCUUUCUG
NC_045512.2	150	163	153	158	3.15	hsa-miR-519c-5p_MIMAT0002831	8	21	12	17	4.27	-7.17	-14.59	-0.841079	AGUAGUGCUAUCCC&GGGAAGCGCUUUCU	((.((((((.((((&))))))))))..))	CAAUCUUUAAUCAGUGUGUAACAUUAGGGAGGACUUGAAAGAGCCACCACAUUUUCACCGAGGCCACGCGGAGUACGAUCGAGUGUACAGUGAACAAUGCUAGGGAGAGCUGCCUAUAUGGAAGAGCCCUAAUGUGUAAAAUUAAUUUUAGUAGUGCUAUCCCCAUGUGAUUUUAAUAGCUUCUUAGGAGAAUGACAAAAAAAAAAAAAAAAAAAAAAAAAAAAAAAAA	CUCUAGAGGGAAGCGCUUUCUG
NC_045512.2	150	163	153	158	3.15	hsa-miR-519a-5p_MIMAT0005452	8	21	12	17	4.27	-7.17	-14.59	-0.841079	AGUAGUGCUAUCCC&GGGAAGCGCUUUCU	((.((((((.((((&))))))))))..))	CAAUCUUUAAUCAGUGUGUAACAUUAGGGAGGACUUGAAAGAGCCACCACAUUUUCACCGAGGCCACGCGGAGUACGAUCGAGUGUACAGUGAACAAUGCUAGGGAGAGCUGCCUAUAUGGAAGAGCCCUAAUGUGUAAAAUUAAUUUUAGUAGUGCUAUCCCCAUGUGAUUUUAAUAGCUUCUUAGGAGAAUGACAAAAAAAAAAAAAAAAAAAAAAAAAAAAAAAAA	CUCUAGAGGGAAGCGCUUUCUG
NC_045512.2	150	163	153	158	3.15	hsa-miR-519b-5p_MIMAT0005454	8	21	12	17	4.27	-7.17	-14.59	-0.841079	AGUAGUGCUAUCCC&GGGAAGCGCUUUCU	((.((((((.((((&))))))))))..))	CAAUCUUUAAUCAGUGUGUAACAUUAGGGAGGACUUGAAAGAGCCACCACAUUUUCACCGAGGCCACGCGGAGUACGAUCGAGUGUACAGUGAACAAUGCUAGGGAGAGCUGCCUAUAUGGAAGAGCCCUAAUGUGUAAAAUUAAUUUUAGUAGUGCUAUCCCCAUGUGAUUUUAAUAGCUUCUUAGGAGAAUGACAAAAAAAAAAAAAAAAAAAAAAAAAAAAAAAAA	CUCUAGAGGGAAGCGCUUUCUG
NC_045512.2	17	26	17	22	1.11	hsa-miR-153-5p_MIMAT0026480	10	19	14	19	1.77	-7.15	-10.03	-0.838733	UGUAACAUUA&UGAUGUUGCA	((((((((((&))))))))))	CAAUCUUUAAUCAGUGUGUAACAUUAGGGAGGACUUGAAAGAGCCACCACAUUUUCACCGAGGCCACGCGGAGUACGAUCGAGUGUACAGUGAACAAUGCUAGGGAGAGCUGCCUAUAUGGAAGAGCCCUAAUGUGUAAAAUUAAUUUUAGUAGUGCUAUCCCCAUGUGAUUUUAAUAGCUUCUUAGGAGAAUGACAAAAAAAAAAAAAAAAAAAAAAAAAAAAAAAAA	UCAUUUUUGUGAUGUUGCAGCU
NC_045512.2	39	47	42	47	1.74	hsa-miR-548d-5p_MIMAT0004812	11	19	11	16	1.38	-7.14	-10.26	-0.83756	AAGAGCCAC&GUGGUUUUU	(((((((((&)))))))))	CAAUCUUUAAUCAGUGUGUAACAUUAGGGAGGACUUGAAAGAGCCACCACAUUUUCACCGAGGCCACGCGGAGUACGAUCGAGUGUACAGUGAACAAUGCUAGGGAGAGCUGCCUAUAUGGAAGAGCCCUAAUGUGUAAAAUUAAUUUUAGUAGUGCUAUCCCCAUGUGAUUUUAAUAGCUUCUUAGGAGAAUGACAAAAAAAAAAAAAAAAAAAAAAAAAAAAAAAAA	AAAAGUAAUUGUGGUUUUUGCC
NC_045512.2	57	80	57	62	7.44	hsa-miR-769-3p_MIMAT0003887	5	22	17	22	6.73	-7.14	-21.31	-0.833215	ACCGAGGCCACGCGGAGUACGAUC&GAUCUCCGGGGUCUUGGU	(((((((((...((((....((((&)))))))).)))))))))	CAAUCUUUAAUCAGUGUGUAACAUUAGGGAGGACUUGAAAGAGCCACCACAUUUUCACCGAGGCCACGCGGAGUACGAUCGAGUGUACAGUGAACAAUGCUAGGGAGAGCUGCCUAUAUGGAAGAGCCCUAAUGUGUAAAAUUAAUUUUAGUAGUGCUAUCCCCAUGUGAUUUUAAUAGCUUCUUAGGAGAAUGACAAAAAAAAAAAAAAAAAAAAAAAAAAAAAAAAA	CUGGGAUCUCCGGGGUCUUGGUU
NC_045512.2	177	188	183	188	3.06	hsa-miR-125b-5p_MIMAT0000423	3	14	3	8	0.36	-7.13	-10.55	-0.836387	UAGCUUCUUAGG&CCUGAGACCCUA	(((..(((((((&)))))))..)))	CAAUCUUUAAUCAGUGUGUAACAUUAGGGAGGACUUGAAAGAGCCACCACAUUUUCACCGAGGCCACGCGGAGUACGAUCGAGUGUACAGUGAACAAUGCUAGGGAGAGCUGCCUAUAUGGAAGAGCCCUAAUGUGUAAAAUUAAUUUUAGUAGUGCUAUCCCCAUGUGAUUUUAAUAGCUUCUUAGGAGAAUGACAAAAAAAAAAAAAAAAAAAAAAAAAAAAAAAAA	UCCCUGAGACCCUAACUUGUGA
NC_045512.2	83	92	87	92	3.03	hsa-miR-4676-3p_MIMAT0019759	1	11	1	6	0.58	-7.11	-10.72	-0.834041	GUGUACAGUG&CACUGUUUCAC	(((.((((((&))))))..)))	CAAUCUUUAAUCAGUGUGUAACAUUAGGGAGGACUUGAAAGAGCCACCACAUUUUCACCGAGGCCACGCGGAGUACGAUCGAGUGUACAGUGAACAAUGCUAGGGAGAGCUGCCUAUAUGGAAGAGCCCUAAUGUGUAAAAUUAAUUUUAGUAGUGCUAUCCCCAUGUGAUUUUAAUAGCUUCUUAGGAGAAUGACAAAAAAAAAAAAAAAAAAAAAAAAAAAAAAAAA	CACUGUUUCACCACUGGCUCUU
NC_045512.2	160	165	160	165	1.63	hsa-miR-760_MIMAT0004957	15	20	15	20	1	-7.11	-9.74	-0.843471	UCCCCA&UGGGGA	((((((&))))))	CAAUCUUUAAUCAGUGUGUAACAUUAGGGAGGACUUGAAAGAGCCACCACAUUUUCACCGAGGCCACGCGGAGUACGAUCGAGUGUACAGUGAACAAUGCUAGGGAGAGCUGCCUAUAUGGAAGAGCCCUAAUGUGUAAAAUUAAUUUUAGUAGUGCUAUCCCCAUGUGAUUUUAAUAGCUUCUUAGGAGAAUGACAAAAAAAAAAAAAAAAAAAAAAAAAAAAAAAAA	CGGCUCUGGGUCUGUGGGGA
NC_045512.2	89	114	99	104	7.08	hsa-miR-1271-5p_MIMAT0005796	4	20	8	13	2.44	-7.1	-16.62	-0.832868	AGUGAACAAUGCUAGGGAGAGCUGCC&GGCACCUAGCAAGCACU	((((.....(((((((......((((&)))))))))))..))))	CAAUCUUUAAUCAGUGUGUAACAUUAGGGAGGACUUGAAAGAGCCACCACAUUUUCACCGAGGCCACGCGGAGUACGAUCGAGUGUACAGUGAACAAUGCUAGGGAGAGCUGCCUAUAUGGAAGAGCCCUAAUGUGUAAAAUUAAUUUUAGUAGUGCUAUCCCCAUGUGAUUUUAAUAGCUUCUUAGGAGAAUGACAAAAAAAAAAAAAAAAAAAAAAAAAAAAAAAAA	CUUGGCACCUAGCAAGCACUCA
NC_045512.2	103	108	103	108	3.79	hsa-miR-150-5p_MIMAT0000451	1	6	1	6	0.05	-7.1	-10.94	-0.832868	GGGAGA&UCUCCC	((((((&))))))	CAAUCUUUAAUCAGUGUGUAACAUUAGGGAGGACUUGAAAGAGCCACCACAUUUUCACCGAGGCCACGCGGAGUACGAUCGAGUGUACAGUGAACAAUGCUAGGGAGAGCUGCCUAUAUGGAAGAGCCCUAAUGUGUAAAAUUAAUUUUAGUAGUGCUAUCCCCAUGUGAUUUUAAUAGCUUCUUAGGAGAAUGACAAAAAAAAAAAAAAAAAAAAAAAAAAAAAAAAA	UCUCCCAACCCUUGUACCAGUG
NC_045512.2	54	60	55	60	2.39	hsa-miR-124-3p_MIMAT0000422	10	16	10	15	0.64	-7.08	-10.11	-0.830521	UUCACCG&CGGUGAA	(((((((&)))))))	CAAUCUUUAAUCAGUGUGUAACAUUAGGGAGGACUUGAAAGAGCCACCACAUUUUCACCGAGGCCACGCGGAGUACGAUCGAGUGUACAGUGAACAAUGCUAGGGAGAGCUGCCUAUAUGGAAGAGCCCUAAUGUGUAAAAUUAAUUUUAGUAGUGCUAUCCCCAUGUGAUUUUAAUAGCUUCUUAGGAGAAUGACAAAAAAAAAAAAAAAAAAAAAAAAAAAAAAAAA	UAAGGCACGCGGUGAAUGCCAA
NC_045512.2	118	131	125	130	3.82	hsa-miR-135b-3p_MIMAT0004698	4	19	5	10	4.66	-7.08	-15.56	-0.830521	AUGGAAGAGCCCUA&UAGGGCUAAAAGCCAU	((((...(((((((&))))))).....))))	CAAUCUUUAAUCAGUGUGUAACAUUAGGGAGGACUUGAAAGAGCCACCACAUUUUCACCGAGGCCACGCGGAGUACGAUCGAGUGUACAGUGAACAAUGCUAGGGAGAGCUGCCUAUAUGGAAGAGCCCUAAUGUGUAAAAUUAAUUUUAGUAGUGCUAUCCCCAUGUGAUUUUAAUAGCUUCUUAGGAGAAUGACAAAAAAAAAAAAAAAAAAAAAAAAAAAAAAAAA	AUGUAGGGCUAAAAGCCAUGGG
NC_045512.2	122	136	123	128	3.54	hsa-miR-125b-2-3p_MIMAT0004603	2	17	11	16	3.21	-7.06	-13.81	-0.828175	AAGAGCCCUAAUGUG&CACAAGUCAGGCUCUU	(((((((....((((&)))).....)))))))	CAAUCUUUAAUCAGUGUGUAACAUUAGGGAGGACUUGAAAGAGCCACCACAUUUUCACCGAGGCCACGCGGAGUACGAUCGAGUGUACAGUGAACAAUGCUAGGGAGAGCUGCCUAUAUGGAAGAGCCCUAAUGUGUAAAAUUAAUUUUAGUAGUGCUAUCCCCAUGUGAUUUUAAUAGCUUCUUAGGAGAAUGACAAAAAAAAAAAAAAAAAAAAAAAAAAAAAAAAA	UCACAAGUCAGGCUCUUGGGAC
NC_045512.2	121	128	123	128	3.15	hsa-miR-135b-5p_MIMAT0000758	4	11	4	9	1.47	-7.06	-11.68	-0.823879	GAAGAGCC&GGCUUUUC	((((((((&))))))))	CAAUCUUUAAUCAGUGUGUAACAUUAGGGAGGACUUGAAAGAGCCACCACAUUUUCACCGAGGCCACGCGGAGUACGAUCGAGUGUACAGUGAACAAUGCUAGGGAGAGCUGCCUAUAUGGAAGAGCCCUAAUGUGUAAAAUUAAUUUUAGUAGUGCUAUCCCCAUGUGAUUUUAAUAGCUUCUUAGGAGAAUGACAAAAAAAAAAAAAAAAAAAAAAAAAAAAAAAAA	UAUGGCUUUUCAUUCCUAUGUGA
NC_045512.2	95	107	98	103	5.24	hsa-miR-200b-3p_MIMAT0000318	6	18	10	15	1.08	-7.06	-13.38	-0.828175	CAAUGCUAGGGAG&CUGCCUGGUAAUG	((.(((((((.((&)).))))))).))	CAAUCUUUAAUCAGUGUGUAACAUUAGGGAGGACUUGAAAGAGCCACCACAUUUUCACCGAGGCCACGCGGAGUACGAUCGAGUGUACAGUGAACAAUGCUAGGGAGAGCUGCCUAUAUGGAAGAGCCCUAAUGUGUAAAAUUAAUUUUAGUAGUGCUAUCCCCAUGUGAUUUUAAUAGCUUCUUAGGAGAAUGACAAAAAAAAAAAAAAAAAAAAAAAAAAAAAAAAA	UAAUACUGCCUGGUAAUGAUGA
NC_045512.2	106	128	123	128	9.66	hsa-miR-2116-5p_MIMAT0011160	1	21	1	6	2.37	-7.06	-19.09	-0.83272	AGAGCUGCCUAUAUGGAAGAGCC&GGUUCUUAGCAUAGGAGGUCU	(((.((.(((((....(((((((&)))))))...))))))).)))	CAAUCUUUAAUCAGUGUGUAACAUUAGGGAGGACUUGAAAGAGCCACCACAUUUUCACCGAGGCCACGCGGAGUACGAUCGAGUGUACAGUGAACAAUGCUAGGGAGAGCUGCCUAUAUGGAAGAGCCCUAAUGUGUAAAAUUAAUUUUAGUAGUGCUAUCCCCAUGUGAUUUUAAUAGCUUCUUAGGAGAAUGACAAAAAAAAAAAAAAAAAAAAAAAAAAAAAAAAA	GGUUCUUAGCAUAGGAGGUCU
NC_045512.2	44	49	44	49	1.1	hsa-miR-541-3p_MIMAT0004920	1	6	1	6	0.88	-7.03	-9.01	-0.824656	CCACCA&UGGUGG	((((((&))))))	CAAUCUUUAAUCAGUGUGUAACAUUAGGGAGGACUUGAAAGAGCCACCACAUUUUCACCGAGGCCACGCGGAGUACGAUCGAGUGUACAGUGAACAAUGCUAGGGAGAGCUGCCUAUAUGGAAGAGCCCUAAUGUGUAAAAUUAAUUUUAGUAGUGCUAUCCCCAUGUGAUUUUAAUAGCUUCUUAGGAGAAUGACAAAAAAAAAAAAAAAAAAAAAAAAAAAAAAAAA	UGGUGGGCACAGAAUCUGGACU
NC_045512.2	180	187	182	187	3.02	hsa-miR-4659b-5p_MIMAT0019733	10	17	10	15	0.38	-7.02	-10.42	-0.837893	CUUCUUAG&CUAAGAAG	((((((((&))))))))	CAAUCUUUAAUCAGUGUGUAACAUUAGGGAGGACUUGAAAGAGCCACCACAUUUUCACCGAGGCCACGCGGAGUACGAUCGAGUGUACAGUGAACAAUGCUAGGGAGAGCUGCCUAUAUGGAAGAGCCCUAAUGUGUAAAAUUAAUUUUAGUAGUGCUAUCCCCAUGUGAUUUUAAUAGCUUCUUAGGAGAAUGACAAAAAAAAAAAAAAAAAAAAAAAAAAAAAAAAA	UUGCCAUGUCUAAGAAGAA
NC_045512.2	61	73	67	72	5.54	hsa-miR-4661-5p_MIMAT0019729	7	19	8	13	0.62	-7.01	-13.17	-0.82231	AGGCCACGCGGAG&CUCUGUGGAUCCU	(((...(((((((&)))))))...)))	CAAUCUUUAAUCAGUGUGUAACAUUAGGGAGGACUUGAAAGAGCCACCACAUUUUCACCGAGGCCACGCGGAGUACGAUCGAGUGUACAGUGAACAAUGCUAGGGAGAGCUGCCUAUAUGGAAGAGCCCUAAUGUGUAAAAUUAAUUUUAGUAGUGCUAUCCCCAUGUGAUUUUAAUAGCUUCUUAGGAGAAUGACAAAAAAAAAAAAAAAAAAAAAAAAAAAAAAAAA	AACUAGCUCUGUGGAUCCUGAC
NC_045512.2	60	65	60	65	2.45	hsa-miR-128-3p_MIMAT0000424	13	18	13	18	0.25	-6.99	-9.69	-0.824463	GAGGCC&GGUCUC	((((((&))))))	CAAUCUUUAAUCAGUGUGUAACAUUAGGGAGGACUUGAAAGAGCCACCACAUUUUCACCGAGGCCACGCGGAGUACGAUCGAGUGUACAGUGAACAAUGCUAGGGAGAGCUGCCUAUAUGGAAGAGCCCUAAUGUGUAAAAUUAAUUUUAGUAGUGCUAUCCCCAUGUGAUUUUAAUAGCUUCUUAGGAGAAUGACAAAAAAAAAAAAAAAAAAAAAAAAAAAAAAAAA	UCACAGUGAACCGGUCUCUUU
NC_045512.2	42	47	42	47	1.3	hsa-miR-219a-2-3p_MIMAT0004675	7	12	7	12	1.75	-6.99	-10.04	-0.819964	AGCCAC&GUGGCU	((((((&))))))	CAAUCUUUAAUCAGUGUGUAACAUUAGGGAGGACUUGAAAGAGCCACCACAUUUUCACCGAGGCCACGCGGAGUACGAUCGAGUGUACAGUGAACAAUGCUAGGGAGAGCUGCCUAUAUGGAAGAGCCCUAAUGUGUAAAAUUAAUUUUAGUAGUGCUAUCCCCAUGUGAUUUUAAUAGCUUCUUAGGAGAAUGACAAAAAAAAAAAAAAAAAAAAAAAAAAAAAAAAA	AGAAUUGUGGCUGGACAUCUGU
NC_045512.2	100	122	116	121	9.43	hsa-miR-3605-3p_MIMAT0017982	3	23	4	9	0.09	-6.99	-16.51	-0.815711	CUAGGGAGAGCUGCCUAUAUGGA&UCCGUGUUACCUGUCCUCUAG	(((((((.((......(((((((&)))))))...)).))).))))	CAAUCUUUAAUCAGUGUGUAACAUUAGGGAGGACUUGAAAGAGCCACCACAUUUUCACCGAGGCCACGCGGAGUACGAUCGAGUGUACAGUGAACAAUGCUAGGGAGAGCUGCCUAUAUGGAAGAGCCCUAAUGUGUAAAAUUAAUUUUAGUAGUGCUAUCCCCAUGUGAUUUUAAUAGCUUCUUAGGAGAAUGACAAAAAAAAAAAAAAAAAAAAAAAAAAAAAAAAA	CCUCCGUGUUACCUGUCCUCUAG
NC_045512.2	63	68	63	68	1.91	hsa-miR-135a-3p_MIMAT0004595	16	21	16	21	1.96	-6.98	-10.85	-0.818791	GCCACG&CGUGGC	((((((&))))))	CAAUCUUUAAUCAGUGUGUAACAUUAGGGAGGACUUGAAAGAGCCACCACAUUUUCACCGAGGCCACGCGGAGUACGAUCGAGUGUACAGUGAACAAUGCUAGGGAGAGCUGCCUAUAUGGAAGAGCCCUAAUGUGUAAAAUUAAUUUUAGUAGUGCUAUCCCCAUGUGAUUUUAAUAGCUUCUUAGGAGAAUGACAAAAAAAAAAAAAAAAAAAAAAAAAAAAAAAAA	UAUAGGGAUUGGAGCCGUGGCG
NC_045512.2	73	86	73	78	4.65	hsa-miR-181a-3p_MIMAT0000270	8	21	16	21	2.03	-6.98	-13.66	-0.818791	GUACGAUCGAGUGU&ACCGUUGAUUGUAC	((((((((((..((&))..))))))))))	CAAUCUUUAAUCAGUGUGUAACAUUAGGGAGGACUUGAAAGAGCCACCACAUUUUCACCGAGGCCACGCGGAGUACGAUCGAGUGUACAGUGAACAAUGCUAGGGAGAGCUGCCUAUAUGGAAGAGCCCUAAUGUGUAAAAUUAAUUUUAGUAGUGCUAUCCCCAUGUGAUUUUAAUAGCUUCUUAGGAGAAUGACAAAAAAAAAAAAAAAAAAAAAAAAAAAAAAAAA	ACCAUCGACCGUUGAUUGUACC
NC_045512.2	42	47	42	47	1.3	hsa-miR-27a-3p_MIMAT0000084	7	12	7	12	1.96	-6.98	-10.24	-0.823284	AGCCAC&GUGGCU	((((((&))))))	CAAUCUUUAAUCAGUGUGUAACAUUAGGGAGGACUUGAAAGAGCCACCACAUUUUCACCGAGGCCACGCGGAGUACGAUCGAGUGUACAGUGAACAAUGCUAGGGAGAGCUGCCUAUAUGGAAGAGCCCUAAUGUGUAAAAUUAAUUUUAGUAGUGCUAUCCCCAUGUGAUUUUAAUAGCUUCUUAGGAGAAUGACAAAAAAAAAAAAAAAAAAAAAAAAAAAAAAAAA	UUCACAGUGGCUAAGUUCCGC
NC_045512.2	123	129	124	129	3.02	hsa-miR-4707-5p_MIMAT0019807	15	21	15	20	0.5	-6.97	-10.49	-0.813377	AGAGCCC&GGGUUCU	(((((((&)))))))	CAAUCUUUAAUCAGUGUGUAACAUUAGGGAGGACUUGAAAGAGCCACCACAUUUUCACCGAGGCCACGCGGAGUACGAUCGAGUGUACAGUGAACAAUGCUAGGGAGAGCUGCCUAUAUGGAAGAGCCCUAAUGUGUAAAAUUAAUUUUAGUAGUGCUAUCCCCAUGUGAUUUUAAUAGCUUCUUAGGAGAAUGACAAAAAAAAAAAAAAAAAAAAAAAAAAAAAAAAA	GCCCCGGCGCGGGCGGGUUCUGG
NC_045512.2	180	187	182	187	3.02	hsa-miR-4659a-5p_MIMAT0019726	10	17	10	15	0.42	-6.96	-10.4	-0.816445	CUUCUUAG&CUAAGAAG	((((((((&))))))))	CAAUCUUUAAUCAGUGUGUAACAUUAGGGAGGACUUGAAAGAGCCACCACAUUUUCACCGAGGCCACGCGGAGUACGAUCGAGUGUACAGUGAACAAUGCUAGGGAGAGCUGCCUAUAUGGAAGAGCCCUAAUGUGUAAAAUUAAUUUUAGUAGUGCUAUCCCCAUGUGAUUUUAAUAGCUUCUUAGGAGAAUGACAAAAAAAAAAAAAAAAAAAAAAAAAAAAAAAAA	CUGCCAUGUCUAAGAAGAAAAC
NC_045512.2	115	133	128	133	4.83	hsa-miR-450a-1-3p_MIMAT0022700	1	21	1	6	1.16	-6.95	-12.94	-0.815272	UAUAUGGAAGAGCCCUAAU&AUUGGGAACAUUUUGCAUGUA	((((((.((((..((((((&))))))....)))).))))))	CAAUCUUUAAUCAGUGUGUAACAUUAGGGAGGACUUGAAAGAGCCACCACAUUUUCACCGAGGCCACGCGGAGUACGAUCGAGUGUACAGUGAACAAUGCUAGGGAGAGCUGCCUAUAUGGAAGAGCCCUAAUGUGUAAAAUUAAUUUUAGUAGUGCUAUCCCCAUGUGAUUUUAAUAGCUUCUUAGGAGAAUGACAAAAAAAAAAAAAAAAAAAAAAAAAAAAAAAAA	AUUGGGAACAUUUUGCAUGUAU
NC_045512.2	122	128	123	128	2.69	hsa-miR-4676-3p_MIMAT0019759	16	22	16	21	0.51	-6.95	-10.15	-0.815272	AAGAGCC&GGCUCUU	(((((((&)))))))	CAAUCUUUAAUCAGUGUGUAACAUUAGGGAGGACUUGAAAGAGCCACCACAUUUUCACCGAGGCCACGCGGAGUACGAUCGAGUGUACAGUGAACAAUGCUAGGGAGAGCUGCCUAUAUGGAAGAGCCCUAAUGUGUAAAAUUAAUUUUAGUAGUGCUAUCCCCAUGUGAUUUUAAUAGCUUCUUAGGAGAAUGACAAAAAAAAAAAAAAAAAAAAAAAAAAAAAAAAA	CACUGUUUCACCACUGGCUCUU
NC_045512.2	125	131	125	130	2.43	hsa-miR-744-5p_MIMAT0004945	9	15	10	15	2.97	-6.95	-12.35	-0.815272	AGCCCUA&UAGGGCU	(((((((&)))))))	CAAUCUUUAAUCAGUGUGUAACAUUAGGGAGGACUUGAAAGAGCCACCACAUUUUCACCGAGGCCACGCGGAGUACGAUCGAGUGUACAGUGAACAAUGCUAGGGAGAGCUGCCUAUAUGGAAGAGCCCUAAUGUGUAAAAUUAAUUUUAGUAGUGCUAUCCCCAUGUGAUUUUAAUAGCUUCUUAGGAGAAUGACAAAAAAAAAAAAAAAAAAAAAAAAAAAAAAAAA	UGCGGGGCUAGGGCUAACAGCA
NC_045512.2	162	180	175	180	4.89	hsa-miR-138-2-3p_MIMAT0004596	1	20	1	6	0.4	-6.94	-12.23	-0.814099	CCCAUGUGAUUUUAAUAGC&GCUAUUUCACGACACCAGGG	(((..(((.....((((((&))))))......)))..)))	CAAUCUUUAAUCAGUGUGUAACAUUAGGGAGGACUUGAAAGAGCCACCACAUUUUCACCGAGGCCACGCGGAGUACGAUCGAGUGUACAGUGAACAAUGCUAGGGAGAGCUGCCUAUAUGGAAGAGCCCUAAUGUGUAAAAUUAAUUUUAGUAGUGCUAUCCCCAUGUGAUUUUAAUAGCUUCUUAGGAGAAUGACAAAAAAAAAAAAAAAAAAAAAAAAAAAAAAAAA	GCUAUUUCACGACACCAGGGUU
NC_045512.2	81	92	87	92	3.09	hsa-miR-143-3p_MIMAT0000435	11	21	11	16	2	-6.94	-12.03	-0.818566	GAGUGUACAGUG&CACUGUAGCUC	(((..(((((((&))))))).)))	CAAUCUUUAAUCAGUGUGUAACAUUAGGGAGGACUUGAAAGAGCCACCACAUUUUCACCGAGGCCACGCGGAGUACGAUCGAGUGUACAGUGAACAAUGCUAGGGAGAGCUGCCUAUAUGGAAGAGCCCUAAUGUGUAAAAUUAAUUUUAGUAGUGCUAUCCCCAUGUGAUUUUAAUAGCUUCUUAGGAGAAUGACAAAAAAAAAAAAAAAAAAAAAAAAAAAAAAAAA	UGAGAUGAAGCACUGUAGCUC
NC_045512.2	48	59	53	58	2.35	hsa-miR-4676-5p_MIMAT0019758	9	20	10	15	3.51	-6.94	-12.8	-0.818566	CACAUUUUCACC&GGUGAGACAGUG	(((..(((((((&)))))))..)))	CAAUCUUUAAUCAGUGUGUAACAUUAGGGAGGACUUGAAAGAGCCACCACAUUUUCACCGAGGCCACGCGGAGUACGAUCGAGUGUACAGUGAACAAUGCUAGGGAGAGCUGCCUAUAUGGAAGAGCCCUAAUGUGUAAAAUUAAUUUUAGUAGUGCUAUCCCCAUGUGAUUUUAAUAGCUUCUUAGGAGAAUGACAAAAAAAAAAAAAAAAAAAAAAAAAAAAAAAAA	GAGCCAGUGGUGAGACAGUGA
NC_045512.2	108	114	109	114	1.45	hsa-miR-6770-3p_MIMAT0027441	3	9	3	8	2.91	-6.92	-11.28	-0.816207	AGCUGCC&GGCGGCU	(((((((&)))))))	CAAUCUUUAAUCAGUGUGUAACAUUAGGGAGGACUUGAAAGAGCCACCACAUUUUCACCGAGGCCACGCGGAGUACGAUCGAGUGUACAGUGAACAAUGCUAGGGAGAGCUGCCUAUAUGGAAGAGCCCUAAUGUGUAAAAUUAAUUUUAGUAGUGCUAUCCCCAUGUGAUUUUAAUAGCUUCUUAGGAGAAUGACAAAAAAAAAAAAAAAAAAAAAAAAAAAAAAAAA	CUGGCGGCUGUGUCUUCACAG
NC_045512.2	159	164	159	164	1.92	hsa-miR-181d-3p_MIMAT0026608	7	12	7	12	1.63	-6.91	-10.46	-0.815027	AUCCCC&GGGGAU	((((((&))))))	CAAUCUUUAAUCAGUGUGUAACAUUAGGGAGGACUUGAAAGAGCCACCACAUUUUCACCGAGGCCACGCGGAGUACGAUCGAGUGUACAGUGAACAAUGCUAGGGAGAGCUGCCUAUAUGGAAGAGCCCUAAUGUGUAAAAUUAAUUUUAGUAGUGCUAUCCCCAUGUGAUUUUAAUAGCUUCUUAGGAGAAUGACAAAAAAAAAAAAAAAAAAAAAAAAAAAAAAAAA	CCACCGGGGGAUGAAUGUCAC
NC_045512.2	56	63	56	61	3.48	hsa-miR-539-5p_MIMAT0003163	12	19	14	19	2.15	-6.91	-12.54	-0.81058	CACCGAGG&CCUUGGUG	((((((((&))))))))	CAAUCUUUAAUCAGUGUGUAACAUUAGGGAGGACUUGAAAGAGCCACCACAUUUUCACCGAGGCCACGCGGAGUACGAUCGAGUGUACAGUGAACAAUGCUAGGGAGAGCUGCCUAUAUGGAAGAGCCCUAAUGUGUAAAAUUAAUUUUAGUAGUGCUAUCCCCAUGUGAUUUUAAUAGCUUCUUAGGAGAAUGACAAAAAAAAAAAAAAAAAAAAAAAAAAAAAAAAA	GGAGAAAUUAUCCUUGGUGUGU
NC_045512.2	103	118	112	117	6.69	hsa-miR-20b-3p_MIMAT0004752	8	20	9	14	2.61	-6.89	-16.19	-0.808233	GGGAGAGCUGCCUAUA&UAUGGGCACUUCC	(((((...((((((((&)))))))))))))	CAAUCUUUAAUCAGUGUGUAACAUUAGGGAGGACUUGAAAGAGCCACCACAUUUUCACCGAGGCCACGCGGAGUACGAUCGAGUGUACAGUGAACAAUGCUAGGGAGAGCUGCCUAUAUGGAAGAGCCCUAAUGUGUAAAAUUAAUUUUAGUAGUGCUAUCCCCAUGUGAUUUUAAUAGCUUCUUAGGAGAAUGACAAAAAAAAAAAAAAAAAAAAAAAAAAAAAAAAA	ACUGUAGUAUGGGCACUUCCAG
NC_045512.2	97	108	102	107	5.3	hsa-miR-4659a-3p_MIMAT0019727	3	15	4	9	0.6	-6.87	-12.77	-0.805887	AUGCUAGGGAGA&UCUUCUUAGACAU	((((((((((((&))))))))).)))	CAAUCUUUAAUCAGUGUGUAACAUUAGGGAGGACUUGAAAGAGCCACCACAUUUUCACCGAGGCCACGCGGAGUACGAUCGAGUGUACAGUGAACAAUGCUAGGGAGAGCUGCCUAUAUGGAAGAGCCCUAAUGUGUAAAAUUAAUUUUAGUAGUGCUAUCCCCAUGUGAUUUUAAUAGCUUCUUAGGAGAAUGACAAAAAAAAAAAAAAAAAAAAAAAAAAAAAAAAA	UUUCUUCUUAGACAUGGCAACG
NC_045512.2	70	81	71	76	3.31	hsa-miR-450a-5p_MIMAT0001545	6	16	10	15	0.48	-6.87	-10.66	-0.805887	GGAGUACGAUCG&CGAUGUGUUCC	(((((((.((((&)))))))))))	CAAUCUUUAAUCAGUGUGUAACAUUAGGGAGGACUUGAAAGAGCCACCACAUUUUCACCGAGGCCACGCGGAGUACGAUCGAGUGUACAGUGAACAAUGCUAGGGAGAGCUGCCUAUAUGGAAGAGCCCUAAUGUGUAAAAUUAAUUUUAGUAGUGCUAUCCCCAUGUGAUUUUAAUAGCUUCUUAGGAGAAUGACAAAAAAAAAAAAAAAAAAAAAAAAAAAAAAAAA	UUUUGCGAUGUGUUCCUAAUAU
NC_045512.2	188	197	192	197	1.06	hsa-miR-495-5p_MIMAT0022924	12	21	12	17	1.16	-6.87	-9.09	-0.805887	GAGAAUGACA&UGUUAUUUUC	((((((((((&))))))))))	CAAUCUUUAAUCAGUGUGUAACAUUAGGGAGGACUUGAAAGAGCCACCACAUUUUCACCGAGGCCACGCGGAGUACGAUCGAGUGUACAGUGAACAAUGCUAGGGAGAGCUGCCUAUAUGGAAGAGCCCUAAUGUGUAAAAUUAAUUUUAGUAGUGCUAUCCCCAUGUGAUUUUAAUAGCUUCUUAGGAGAAUGACAAAAAAAAAAAAAAAAAAAAAAAAAAAAAAAAA	GAAGUUGCCCAUGUUAUUUUCG
NC_045512.2	81	95	81	86	3.43	hsa-miR-148a-5p_MIMAT0004549	4	17	12	17	2.41	-6.84	-12.68	-0.802368	GAGUGUACAGUGAAC&GUUCUGAGACACUC	((((((.....((((&))))....))))))	CAAUCUUUAAUCAGUGUGUAACAUUAGGGAGGACUUGAAAGAGCCACCACAUUUUCACCGAGGCCACGCGGAGUACGAUCGAGUGUACAGUGAACAAUGCUAGGGAGAGCUGCCUAUAUGGAAGAGCCCUAAUGUGUAAAAUUAAUUUUAGUAGUGCUAUCCCCAUGUGAUUUUAAUAGCUUCUUAGGAGAAUGACAAAAAAAAAAAAAAAAAAAAAAAAAAAAAAAAA	AAAGUUCUGAGACACUCCGACU
NC_045512.2	1	16	11	16	2.5	hsa-miR-181b-2-3p_MIMAT0031893	3	18	3	8	0.38	-6.84	-9.72	-0.81144	CAAUCUUUAAUCAGUG&CACUGAUCAAUGAAUG	((.((.((.(((((((&))))))).)).)).))	CAAUCUUUAAUCAGUGUGUAACAUUAGGGAGGACUUGAAAGAGCCACCACAUUUUCACCGAGGCCACGCGGAGUACGAUCGAGUGUACAGUGAACAAUGCUAGGGAGAGCUGCCUAUAUGGAAGAGCCCUAAUGUGUAAAAUUAAUUUUAGUAGUGCUAUCCCCAUGUGAUUUUAAUAGCUUCUUAGGAGAAUGACAAAAAAAAAAAAAAAAAAAAAAAAAAAAAAAAA	CUCACUGAUCAAUGAAUGCA
NC_045512.2	61	66	61	66	1.78	hsa-miR-3944-3p_MIMAT0018360	8	13	8	13	0.77	-6.84	-9.39	-0.798206	AGGCCA&UGGCCU	((((((&))))))	CAAUCUUUAAUCAGUGUGUAACAUUAGGGAGGACUUGAAAGAGCCACCACAUUUUCACCGAGGCCACGCGGAGUACGAUCGAGUGUACAGUGAACAAUGCUAGGGAGAGCUGCCUAUAUGGAAGAGCCCUAAUGUGUAAAAUUAAUUUUAGUAGUGCUAUCCCCAUGUGAUUUUAAUAGCUUCUUAGGAGAAUGACAAAAAAAAAAAAAAAAAAAAAAAAAAAAAAAAA	UUCGGGCUGGCCUGCUGCUCCGG
NC_045512.2	36	51	36	41	4.18	hsa-miR-6514-5p_MIMAT0025484	3	17	12	17	1.68	-6.83	-12.69	-0.797039	UGAAAGAGCCACCACA&UGGAGUGGACUUUCA	((((((..((((..((&))..)))).))))))	CAAUCUUUAAUCAGUGUGUAACAUUAGGGAGGACUUGAAAGAGCCACCACAUUUUCACCGAGGCCACGCGGAGUACGAUCGAGUGUACAGUGAACAAUGCUAGGGAGAGCUGCCUAUAUGGAAGAGCCCUAAUGUGUAAAAUUAAUUUUAGUAGUGCUAUCCCCAUGUGAUUUUAAUAGCUUCUUAGGAGAAUGACAAAAAAAAAAAAAAAAAAAAAAAAAAAAAAAAA	UAUGGAGUGGACUUUCAGCUGGC
NC_045512.2	41	46	41	46	1.23	hsa-miR-659-3p_MIMAT0003337	3	8	3	8	0.02	-6.83	-8.08	-0.801195	GAGCCA&UGGUUC	((((((&))))))	CAAUCUUUAAUCAGUGUGUAACAUUAGGGAGGACUUGAAAGAGCCACCACAUUUUCACCGAGGCCACGCGGAGUACGAUCGAGUGUACAGUGAACAAUGCUAGGGAGAGCUGCCUAUAUGGAAGAGCCCUAAUGUGUAAAAUUAAUUUUAGUAGUGCUAUCCCCAUGUGAUUUUAAUAGCUUCUUAGGAGAAUGACAAAAAAAAAAAAAAAAAAAAAAAAAAAAAAAAA	CUUGGUUCAGGGAGGGUCCCCA
NC_045512.2	73	90	80	85	5.15	hsa-miR-214-5p_MIMAT0004564	4	22	11	16	2.03	-6.82	-14	-0.800022	GUACGAUCGAGUGUACAG&CUGUCUACACUUGCUGUGC	((((...(((((((((((&))))..)))))))..))))	CAAUCUUUAAUCAGUGUGUAACAUUAGGGAGGACUUGAAAGAGCCACCACAUUUUCACCGAGGCCACGCGGAGUACGAUCGAGUGUACAGUGAACAAUGCUAGGGAGAGCUGCCUAUAUGGAAGAGCCCUAAUGUGUAAAAUUAAUUUUAGUAGUGCUAUCCCCAUGUGAUUUUAAUAGCUUCUUAGGAGAAUGACAAAAAAAAAAAAAAAAAAAAAAAAAAAAAAAAA	UGCCUGUCUACACUUGCUGUGC
NC_045512.2	60	71	60	65	4.03	hsa-miR-221-3p_MIMAT0000278	12	23	18	23	1.5	-6.82	-12.35	-0.795872	GAGGCCACGCGG&CUGCUGGGUUUC	((((((..((((&))))..))))))	CAAUCUUUAAUCAGUGUGUAACAUUAGGGAGGACUUGAAAGAGCCACCACAUUUUCACCGAGGCCACGCGGAGUACGAUCGAGUGUACAGUGAACAAUGCUAGGGAGAGCUGCCUAUAUGGAAGAGCCCUAAUGUGUAAAAUUAAUUUUAGUAGUGCUAUCCCCAUGUGAUUUUAAUAGCUUCUUAGGAGAAUGACAAAAAAAAAAAAAAAAAAAAAAAAAAAAAAAAA	AGCUACAUUGUCUGCUGGGUUUC
NC_045512.2	103	108	103	108	3.79	hsa-miR-6820-3p_MIMAT0027541	8	13	8	13	0.01	-6.8	-10.6	-0.797676	GGGAGA&UCUCCC	((((((&))))))	CAAUCUUUAAUCAGUGUGUAACAUUAGGGAGGACUUGAAAGAGCCACCACAUUUUCACCGAGGCCACGCGGAGUACGAUCGAGUGUACAGUGAACAAUGCUAGGGAGAGCUGCCUAUAUGGAAGAGCCCUAAUGUGUAAAAUUAAUUUUAGUAGUGCUAUCCCCAUGUGAUUUUAAUAGCUUCUUAGGAGAAUGACAAAAAAAAAAAAAAAAAAAAAAAAAAAAAAAAA	UGUGACUUCUCCCCUGCCACAG
NC_045512.2	103	109	103	108	3.97	hsa-miR-625-3p_MIMAT0004808	11	17	12	17	0.07	-6.79	-10.83	-0.796503	GGGAGAG&CUUUCCC	(((((((&)))))))	CAAUCUUUAAUCAGUGUGUAACAUUAGGGAGGACUUGAAAGAGCCACCACAUUUUCACCGAGGCCACGCGGAGUACGAUCGAGUGUACAGUGAACAAUGCUAGGGAGAGCUGCCUAUAUGGAAGAGCCCUAAUGUGUAAAAUUAAUUUUAGUAGUGCUAUCCCCAUGUGAUUUUAAUAGCUUCUUAGGAGAAUGACAAAAAAAAAAAAAAAAAAAAAAAAAAAAAAAAA	GACUAUAGAACUUUCCCCCUCA
NC_045512.2	84	93	88	93	2.78	hsa-miR-181b-3p_MIMAT0022692	2	11	2	7	0.36	-6.78	-9.92	-0.799694	UGUACAGUGA&UCACUGAACA	(((.((((((&)))))).)))	CAAUCUUUAAUCAGUGUGUAACAUUAGGGAGGACUUGAAAGAGCCACCACAUUUUCACCGAGGCCACGCGGAGUACGAUCGAGUGUACAGUGAACAAUGCUAGGGAGAGCUGCCUAUAUGGAAGAGCCCUAAUGUGUAAAAUUAAUUUUAGUAGUGCUAUCCCCAUGUGAUUUUAAUAGCUUCUUAGGAGAAUGACAAAAAAAAAAAAAAAAAAAAAAAAAAAAAAAAA	CUCACUGAACAAUGAAUGCAA
NC_045512.2	13	19	14	19	1.65	hsa-miR-523-3p_MIMAT0002840	3	9	3	8	0.09	-6.78	-8.52	-0.791204	AGUGUGU&ACGCGCU	(((((((&)))))))	CAAUCUUUAAUCAGUGUGUAACAUUAGGGAGGACUUGAAAGAGCCACCACAUUUUCACCGAGGCCACGCGGAGUACGAUCGAGUGUACAGUGAACAAUGCUAGGGAGAGCUGCCUAUAUGGAAGAGCCCUAAUGUGUAAAAUUAAUUUUAGUAGUGCUAUCCCCAUGUGAUUUUAAUAGCUUCUUAGGAGAAUGACAAAAAAAAAAAAAAAAAAAAAAAAAAAAAAAAA	GAACGCGCUUCCCUAUAGAGGGU
NC_045512.2	106	111	106	111	1.75	hsa-miR-3928-5p_MIMAT0027037	4	9	4	9	0.26	-6.77	-8.78	-0.790037	AGAGCU&AGCUCU	((((((&))))))	CAAUCUUUAAUCAGUGUGUAACAUUAGGGAGGACUUGAAAGAGCCACCACAUUUUCACCGAGGCCACGCGGAGUACGAUCGAGUGUACAGUGAACAAUGCUAGGGAGAGCUGCCUAUAUGGAAGAGCCCUAAUGUGUAAAAUUAAUUUUAGUAGUGCUAUCCCCAUGUGAUUUUAAUAGCUUCUUAGGAGAAUGACAAAAAAAAAAAAAAAAAAAAAAAAAAAAAAAAA	UGAAGCUCUAAGGUUCCGCCUGC
NC_045512.2	102	113	102	107	4.15	hsa-miR-4728-3p_MIMAT0019850	4	15	10	15	0.61	-6.76	-11.52	-0.781268	AGGGAGAGCUGC&GCUGACCUCCCU	((((((....((&))....))))))	CAAUCUUUAAUCAGUGUGUAACAUUAGGGAGGACUUGAAAGAGCCACCACAUUUUCACCGAGGCCACGCGGAGUACGAUCGAGUGUACAGUGAACAAUGCUAGGGAGAGCUGCCUAUAUGGAAGAGCCCUAAUGUGUAAAAUUAAUUUUAGUAGUGCUAUCCCCAUGUGAUUUUAAUAGCUUCUUAGGAGAAUGACAAAAAAAAAAAAAAAAAAAAAAAAAAAAAAAAA	CAUGCUGACCUCCCUCCUGCCCCAG
NC_045512.2	12	30	24	29	4.29	hsa-miR-125a-5p_MIMAT0000443	1	21	2	7	0.22	-6.74	-11.25	-0.782649	CAGUGUGUAACAUUAGGGA&UCCCUGAGACCCUUUAACCUG	(((.((......(((((((&))))))).........)))))	CAAUCUUUAAUCAGUGUGUAACAUUAGGGAGGACUUGAAAGAGCCACCACAUUUUCACCGAGGCCACGCGGAGUACGAUCGAGUGUACAGUGAACAAUGCUAGGGAGAGCUGCCUAUAUGGAAGAGCCCUAAUGUGUAAAAUUAAUUUUAGUAGUGCUAUCCCCAUGUGAUUUUAAUAGCUUCUUAGGAGAAUGACAAAAAAAAAAAAAAAAAAAAAAAAAAAAAAAAA	UCCCUGAGACCCUUUAACCUGUGA
NC_045512.2	82	104	99	104	7.26	hsa-miR-221-5p_MIMAT0004568	2	21	2	7	1.56	-6.73	-15.55	-0.789465	AGUGUACAGUGAACAAUGCUAGG&CCUGGCAUACAAUGUAGAUU	(((.((((.((....((((((((&)))))))).)).)))).)))	CAAUCUUUAAUCAGUGUGUAACAUUAGGGAGGACUUGAAAGAGCCACCACAUUUUCACCGAGGCCACGCGGAGUACGAUCGAGUGUACAGUGAACAAUGCUAGGGAGAGCUGCCUAUAUGGAAGAGCCCUAAUGUGUAAAAUUAAUUUUAGUAGUGCUAUCCCCAUGUGAUUUUAAUAGCUUCUUAGGAGAAUGACAAAAAAAAAAAAAAAAAAAAAAAAAAAAAAAAA	ACCUGGCAUACAAUGUAGAUUU
NC_045512.2	159	164	159	164	1.92	hsa-miR-615-5p_MIMAT0004804	1	6	1	6	1.44	-6.73	-10.09	-0.789465	AUCCCC&GGGGGU	((((((&))))))	CAAUCUUUAAUCAGUGUGUAACAUUAGGGAGGACUUGAAAGAGCCACCACAUUUUCACCGAGGCCACGCGGAGUACGAUCGAGUGUACAGUGAACAAUGCUAGGGAGAGCUGCCUAUAUGGAAGAGCCCUAAUGUGUAAAAUUAAUUUUAGUAGUGCUAUCCCCAUGUGAUUUUAAUAGCUUCUUAGGAGAAUGACAAAAAAAAAAAAAAAAAAAAAAAAAAAAAAAAA	GGGGGUCCCCGGUGCUCGGAUC
NC_045512.2	40	45	40	45	1.32	hsa-miR-4802-5p_MIMAT0019981	7	12	7	12	0.59	-6.72	-8.63	-0.788292	AGAGCC&GGUUCU	((((((&))))))	CAAUCUUUAAUCAGUGUGUAACAUUAGGGAGGACUUGAAAGAGCCACCACAUUUUCACCGAGGCCACGCGGAGUACGAUCGAGUGUACAGUGAACAAUGCUAGGGAGAGCUGCCUAUAUGGAAGAGCCCUAAUGUGUAAAAUUAAUUUUAGUAGUGCUAUCCCCAUGUGAUUUUAAUAGCUUCUUAGGAGAAUGACAAAAAAAAAAAAAAAAAAAAAAAAAAAAAAAAA	UAUGGAGGUUCUAGACCAUGUU
NC_045512.2	68	73	68	73	3.08	hsa-miR-3180-5p_MIMAT0015057	11	16	11	16	0.03	-6.71	-9.82	-0.77549	GCGGAG&CUCCGC	((((((&))))))	CAAUCUUUAAUCAGUGUGUAACAUUAGGGAGGACUUGAAAGAGCCACCACAUUUUCACCGAGGCCACGCGGAGUACGAUCGAGUGUACAGUGAACAAUGCUAGGGAGAGCUGCCUAUAUGGAAGAGCCCUAAUGUGUAAAAUUAAUUUUAGUAGUGCUAUCCCCAUGUGAUUUUAAUAGCUUCUUAGGAGAAUGACAAAAAAAAAAAAAAAAAAAAAAAAAAAAAAAAA	CUUCCAGACGCUCCGCCCCACGUCG
NC_045512.2	26	32	27	32	3.54	hsa-miR-6734-3p_MIMAT0027370	3	9	3	8	0	-6.7	-10.24	-0.781868	AGGGAGG&CUUCCCU	(((((((&)))))))	CAAUCUUUAAUCAGUGUGUAACAUUAGGGAGGACUUGAAAGAGCCACCACAUUUUCACCGAGGCCACGCGGAGUACGAUCGAGUGUACAGUGAACAAUGCUAGGGAGAGCUGCCUAUAUGGAAGAGCCCUAAUGUGUAAAAUUAAUUUUAGUAGUGCUAUCCCCAUGUGAUUUUAAUAGCUUCUUAGGAGAAUGACAAAAAAAAAAAAAAAAAAAAAAAAAAAAAAAAA	CCCUUCCCUCACUCUUCUCUCAG
NC_045512.2	22	36	27	32	4.48	hsa-miR-520a-3p_MIMAT0002834	2	16	7	12	3.03	-6.67	-14.18	-0.782426	CAUUAGGGAGGACUU&AAGUGCUUCCCUUUG	((..(((((((((((&)))).))))))).))	CAAUCUUUAAUCAGUGUGUAACAUUAGGGAGGACUUGAAAGAGCCACCACAUUUUCACCGAGGCCACGCGGAGUACGAUCGAGUGUACAGUGAACAAUGCUAGGGAGAGCUGCCUAUAUGGAAGAGCCCUAAUGUGUAAAAUUAAUUUUAGUAGUGCUAUCCCCAUGUGAUUUUAAUAGCUUCUUAGGAGAAUGACAAAAAAAAAAAAAAAAAAAAAAAAAAAAAAAAA	AAAGUGCUUCCCUUUGGACUGU
NC_045512.2	63	68	63	68	1.91	hsa-miR-509-3-5p_MIMAT0004975	10	15	10	15	2.16	-6.67	-10.74	-0.782426	GCCACG&CGUGGC	((((((&))))))	CAAUCUUUAAUCAGUGUGUAACAUUAGGGAGGACUUGAAAGAGCCACCACAUUUUCACCGAGGCCACGCGGAGUACGAUCGAGUGUACAGUGAACAAUGCUAGGGAGAGCUGCCUAUAUGGAAGAGCCCUAAUGUGUAAAAUUAAUUUUAGUAGUGCUAUCCCCAUGUGAUUUUAAUAGCUUCUUAGGAGAAUGACAAAAAAAAAAAAAAAAAAAAAAAAAAAAAAAAA	UACUGCAGACGUGGCAAUCAUG
NC_045512.2	52	64	59	64	3.98	hsa-miR-532-5p_MIMAT0002888	4	18	4	9	1.98	-6.67	-12.63	-0.782426	UUUUCACCGAGGC&GCCUUGAGUGUAGGA	(((((((((((((&)))))).))).))))	CAAUCUUUAAUCAGUGUGUAACAUUAGGGAGGACUUGAAAGAGCCACCACAUUUUCACCGAGGCCACGCGGAGUACGAUCGAGUGUACAGUGAACAAUGCUAGGGAGAGCUGCCUAUAUGGAAGAGCCCUAAUGUGUAAAAUUAAUUUUAGUAGUGCUAUCCCCAUGUGAUUUUAAUAGCUUCUUAGGAGAAUGACAAAAAAAAAAAAAAAAAAAAAAAAAAAAAAAAA	CAUGCCUUGAGUGUAGGACCGU
NC_045512.2	31	46	41	46	4.25	hsa-miR-218-1-3p_MIMAT0004565	2	18	2	7	3.76	-6.66	-14.67	-0.781253	GGACUUGAAAGAGCCA&UGGUUCCGUCAAGCACC	((.(((((..((((((&))))))..)))))..))	CAAUCUUUAAUCAGUGUGUAACAUUAGGGAGGACUUGAAAGAGCCACCACAUUUUCACCGAGGCCACGCGGAGUACGAUCGAGUGUACAGUGAACAAUGCUAGGGAGAGCUGCCUAUAUGGAAGAGCCCUAAUGUGUAAAAUUAAUUUUAGUAGUGCUAUCCCCAUGUGAUUUUAAUAGCUUCUUAGGAGAAUGACAAAAAAAAAAAAAAAAAAAAAAAAAAAAAAAAA	AUGGUUCCGUCAAGCACCAUGG
NC_045512.2	150	157	152	157	2.31	hsa-miR-548j-3p_MIMAT0026737	9	16	9	14	0.93	-6.66	-9.9	-0.78554	AGUAGUGC&GCAUUACU	((((((((&))))))))	CAAUCUUUAAUCAGUGUGUAACAUUAGGGAGGACUUGAAAGAGCCACCACAUUUUCACCGAGGCCACGCGGAGUACGAUCGAGUGUACAGUGAACAAUGCUAGGGAGAGCUGCCUAUAUGGAAGAGCCCUAAUGUGUAAAAUUAAUUUUAGUAGUGCUAUCCCCAUGUGAUUUUAAUAGCUUCUUAGGAGAAUGACAAAAAAAAAAAAAAAAAAAAAAAAAAAAAAAAA	CAAAAACUGCAUUACUUUUGC
NC_045512.2	56	65	56	61	4.07	hsa-miR-766-5p_MIMAT0022714	5	14	9	14	0.62	-6.66	-11.35	-0.781253	CACCGAGGCC&GGAAUUGGUG	((((((..((&))..))))))	CAAUCUUUAAUCAGUGUGUAACAUUAGGGAGGACUUGAAAGAGCCACCACAUUUUCACCGAGGCCACGCGGAGUACGAUCGAGUGUACAGUGAACAAUGCUAGGGAGAGCUGCCUAUAUGGAAGAGCCCUAAUGUGUAAAAUUAAUUUUAGUAGUGCUAUCCCCAUGUGAUUUUAAUAGCUUCUUAGGAGAAUGACAAAAAAAAAAAAAAAAAAAAAAAAAAAAAAAAA	AGGAGGAAUUGGUGCUGGUCUU
NC_045512.2	153	164	154	159	3.03	hsa-miR-766-5p_MIMAT0022714	2	16	10	15	0.82	-6.66	-10.51	-0.781253	AGUGCUAUCCCC&GGAGGAAUUGGUGCU	(((((((.((((&)).))...)))))))	CAAUCUUUAAUCAGUGUGUAACAUUAGGGAGGACUUGAAAGAGCCACCACAUUUUCACCGAGGCCACGCGGAGUACGAUCGAGUGUACAGUGAACAAUGCUAGGGAGAGCUGCCUAUAUGGAAGAGCCCUAAUGUGUAAAAUUAAUUUUAGUAGUGCUAUCCCCAUGUGAUUUUAAUAGCUUCUUAGGAGAAUGACAAAAAAAAAAAAAAAAAAAAAAAAAAAAAAAAA	AGGAGGAAUUGGUGCUGGUCUU
NC_045512.2	3	17	12	17	2.55	hsa-miR-141-3p_MIMAT0000432	3	20	3	8	4.06	-6.65	-13.26	-0.78008	AUCUUUAAUCAGUGU&ACACUGUCUGGUAAAGAU	(((((((..((((((&)))))).....)))))))	CAAUCUUUAAUCAGUGUGUAACAUUAGGGAGGACUUGAAAGAGCCACCACAUUUUCACCGAGGCCACGCGGAGUACGAUCGAGUGUACAGUGAACAAUGCUAGGGAGAGCUGCCUAUAUGGAAGAGCCCUAAUGUGUAAAAUUAAUUUUAGUAGUGCUAUCCCCAUGUGAUUUUAAUAGCUUCUUAGGAGAAUGACAAAAAAAAAAAAAAAAAAAAAAAAAAAAAAAAA	UAACACUGUCUGGUAAAGAUGG
NC_045512.2	104	110	105	110	4	hsa-miR-6769a-3p_MIMAT0027439	13	19	13	18	3.4	-6.65	-14.05	-0.78436	GGAGAGC&GCUCUCC	(((((((&)))))))	CAAUCUUUAAUCAGUGUGUAACAUUAGGGAGGACUUGAAAGAGCCACCACAUUUUCACCGAGGCCACGCGGAGUACGAUCGAGUGUACAGUGAACAAUGCUAGGGAGAGCUGCCUAUAUGGAAGAGCCCUAAUGUGUAAAAUUAAUUUUAGUAGUGCUAUCCCCAUGUGAUUUUAAUAGCUUCUUAGGAGAAUGACAAAAAAAAAAAAAAAAAAAAAAAAAAAAAAAAA	GAGCCCCUCUCUGCUCUCCAG
NC_045512.2	94	101	95	100	2.19	hsa-miR-107_MIMAT0000104	4	11	5	10	1	-6.64	-9.83	-0.774867	ACAAUGCU&AGCAUUGU	((((((((&))))))))	CAAUCUUUAAUCAGUGUGUAACAUUAGGGAGGACUUGAAAGAGCCACCACAUUUUCACCGAGGCCACGCGGAGUACGAUCGAGUGUACAGUGAACAAUGCUAGGGAGAGCUGCCUAUAUGGAAGAGCCCUAAUGUGUAAAAUUAAUUUUAGUAGUGCUAUCCCCAUGUGAUUUUAAUAGCUUCUUAGGAGAAUGACAAAAAAAAAAAAAAAAAAAAAAAAAAAAAAAAA	AGCAGCAUUGUACAGGGCUAUCA
NC_045512.2	155	165	155	160	3.04	hsa-miR-299-3p_MIMAT0000687	3	14	9	14	4.57	-6.62	-14.23	-0.776561	UGCUAUCCCCA&UGUGGGAUGGUA	(((((((((((&)).)))))))))	CAAUCUUUAAUCAGUGUGUAACAUUAGGGAGGACUUGAAAGAGCCACCACAUUUUCACCGAGGCCACGCGGAGUACGAUCGAGUGUACAGUGAACAAUGCUAGGGAGAGCUGCCUAUAUGGAAGAGCCCUAAUGUGUAAAAUUAAUUUUAGUAGUGCUAUCCCCAUGUGAUUUUAAUAGCUUCUUAGGAGAAUGACAAAAAAAAAAAAAAAAAAAAAAAAAAAAAAAAA	UAUGUGGGAUGGUAAACCGCUU
NC_045512.2	27	39	27	32	4.17	hsa-miR-6802-3p_MIMAT0027505	1	12	7	12	0.05	-6.59	-10.81	-0.773042	GGGAGGACUUGAA&UUCACCCCUCUC	((((((...((((&))))..))))))	CAAUCUUUAAUCAGUGUGUAACAUUAGGGAGGACUUGAAAGAGCCACCACAUUUUCACCGAGGCCACGCGGAGUACGAUCGAGUGUACAGUGAACAAUGCUAGGGAGAGCUGCCUAUAUGGAAGAGCCCUAAUGUGUAAAAUUAAUUUUAGUAGUGCUAUCCCCAUGUGAUUUUAAUAGCUUCUUAGGAGAAUGACAAAAAAAAAAAAAAAAAAAAAAAAAAAAAAAAA	UUCACCCCUCUCACCUAAGCAG
NC_045512.2	64	86	81	86	7.03	hsa-miR-105-5p_MIMAT0000102	5	22	5	10	2.55	-6.57	-16.15	-0.766698	CCACGCGGAGUACGAUCGAGUGU&AUGCUCAGACUCCUGUGG	((((..(((((......((((((&))))))..))))).))))	CAAUCUUUAAUCAGUGUGUAACAUUAGGGAGGACUUGAAAGAGCCACCACAUUUUCACCGAGGCCACGCGGAGUACGAUCGAGUGUACAGUGAACAAUGCUAGGGAGAGCUGCCUAUAUGGAAGAGCCCUAAUGUGUAAAAUUAAUUUUAGUAGUGCUAUCCCCAUGUGAUUUUAAUAGCUUCUUAGGAGAAUGACAAAAAAAAAAAAAAAAAAAAAAAAAAAAAAAAA	UCAAAUGCUCAGACUCCUGUGGU
NC_045512.2	102	113	105	110	4.15	hsa-miR-3173-5p_MIMAT0019214	7	20	11	16	0.11	-6.56	-10.82	-0.769523	AGGGAGAGCUGC&GCCUGUUUUCUCCU	(((((((((.((&))..)))))).)))	CAAUCUUUAAUCAGUGUGUAACAUUAGGGAGGACUUGAAAGAGCCACCACAUUUUCACCGAGGCCACGCGGAGUACGAUCGAGUGUACAGUGAACAAUGCUAGGGAGAGCUGCCUAUAUGGAAGAGCCCUAAUGUGUAAAAUUAAUUUUAGUAGUGCUAUCCCCAUGUGAUUUUAAUAGCUUCUUAGGAGAAUGACAAAAAAAAAAAAAAAAAAAAAAAAAAAAAAAAA	UGCCCUGCCUGUUUUCUCCUUU
NC_045512.2	116	130	116	121	4.75	hsa-miR-655-5p_MIMAT0026626	1	15	10	15	1.02	-6.56	-12.33	-0.769523	AUAUGGAAGAGCCCU&AGAGGUUAUCCGUGU	(((((((..((((((&)).)))).)))))))	CAAUCUUUAAUCAGUGUGUAACAUUAGGGAGGACUUGAAAGAGCCACCACAUUUUCACCGAGGCCACGCGGAGUACGAUCGAGUGUACAGUGAACAAUGCUAGGGAGAGCUGCCUAUAUGGAAGAGCCCUAAUGUGUAAAAUUAAUUUUAGUAGUGCUAUCCCCAUGUGAUUUUAAUAGCUUCUUAGGAGAAUGACAAAAAAAAAAAAAAAAAAAAAAAAAAAAAAAAA	AGAGGUUAUCCGUGUUAUGUUC
NC_045512.2	21	32	27	32	4.43	hsa-miR-642b-5p_MIMAT0022736	6	18	6	11	1.23	-6.55	-12.21	-0.76835	ACAUUAGGGAGG&CCUCUCCAAAUGU	(((((.((((((&))))))..)))))	CAAUCUUUAAUCAGUGUGUAACAUUAGGGAGGACUUGAAAGAGCCACCACAUUUUCACCGAGGCCACGCGGAGUACGAUCGAGUGUACAGUGAACAAUGCUAGGGAGAGCUGCCUAUAUGGAAGAGCCCUAAUGUGUAAAAUUAAUUUUAGUAGUGCUAUCCCCAUGUGAUUUUAAUAGCUUCUUAGGAGAAUGACAAAAAAAAAAAAAAAAAAAAAAAAAAAAAAAAA	GGUUCCCUCUCCAAAUGUGUCU
NC_045512.2	188	198	192	197	1.1	hsa-miR-598-3p_MIMAT0003266	11	21	12	17	0.91	-6.54	-8.55	-0.767177	GAGAAUGACAA&UUGUCAUCGUC	((..(((((((&)))))))..))	CAAUCUUUAAUCAGUGUGUAACAUUAGGGAGGACUUGAAAGAGCCACCACAUUUUCACCGAGGCCACGCGGAGUACGAUCGAGUGUACAGUGAACAAUGCUAGGGAGAGCUGCCUAUAUGGAAGAGCCCUAAUGUGUAAAAUUAAUUUUAGUAGUGCUAUCCCCAUGUGAUUUUAAUAGCUUCUUAGGAGAAUGACAAAAAAAAAAAAAAAAAAAAAAAAAAAAAAAAA	UACGUCAUCGUUGUCAUCGUCA
NC_045512.2	14	20	15	20	1.54	hsa-miR-574-3p_MIMAT0003239	9	15	9	14	1.46	-6.53	-9.53	-0.766004	GUGUGUA&UGCACAC	(((((((&)))))))	CAAUCUUUAAUCAGUGUGUAACAUUAGGGAGGACUUGAAAGAGCCACCACAUUUUCACCGAGGCCACGCGGAGUACGAUCGAGUGUACAGUGAACAAUGCUAGGGAGAGCUGCCUAUAUGGAAGAGCCCUAAUGUGUAAAAUUAAUUUUAGUAGUGCUAUCCCCAUGUGAUUUUAAUAGCUUCUUAGGAGAAUGACAAAAAAAAAAAAAAAAAAAAAAAAAAAAAAAAA	CACGCUCAUGCACACACCCACA
NC_045512.2	125	136	126	131	2.52	hsa-miR-6511a-5p_MIMAT0025478	5	17	11	16	3.57	-6.53	-12.62	-0.76203	AGCCCUAAUGUG&CAGAAGUGGGGCU	(((((((...((&))....)))))))	CAAUCUUUAAUCAGUGUGUAACAUUAGGGAGGACUUGAAAGAGCCACCACAUUUUCACCGAGGCCACGCGGAGUACGAUCGAGUGUACAGUGAACAAUGCUAGGGAGAGCUGCCUAUAUGGAAGAGCCCUAAUGUGUAAAAUUAAUUUUAGUAGUGCUAUCCCCAUGUGAUUUUAAUAGCUUCUUAGGAGAAUGACAAAAAAAAAAAAAAAAAAAAAAAAAAAAAAAAA	CAGGCAGAAGUGGGGCUGACAGG
NC_045512.2	7	19	14	19	2.27	hsa-miR-154-3p_MIMAT0000453	5	16	5	10	1.13	-6.52	-9.92	-0.764831	UUAAUCAGUGUGU&AUACACGGUUGA	((((((.((((((&))))))))))))	CAAUCUUUAAUCAGUGUGUAACAUUAGGGAGGACUUGAAAGAGCCACCACAUUUUCACCGAGGCCACGCGGAGUACGAUCGAGUGUACAGUGAACAAUGCUAGGGAGAGCUGCCUAUAUGGAAGAGCCCUAAUGUGUAAAAUUAAUUUUAGUAGUGCUAUCCCCAUGUGAUUUUAAUAGCUUCUUAGGAGAAUGACAAAAAAAAAAAAAAAAAAAAAAAAAAAAAAAAA	AAUCAUACACGGUUGACCUAUU
NC_045512.2	94	101	95	100	2.19	hsa-miR-103a-3p_MIMAT0000101	4	11	5	10	1.15	-6.51	-9.85	-0.759696	ACAAUGCU&AGCAUUGU	((((((((&))))))))	CAAUCUUUAAUCAGUGUGUAACAUUAGGGAGGACUUGAAAGAGCCACCACAUUUUCACCGAGGCCACGCGGAGUACGAUCGAGUGUACAGUGAACAAUGCUAGGGAGAGCUGCCUAUAUGGAAGAGCCCUAAUGUGUAAAAUUAAUUUUAGUAGUGCUAUCCCCAUGUGAUUUUAAUAGCUUCUUAGGAGAAUGACAAAAAAAAAAAAAAAAAAAAAAAAAAAAAAAAA	AGCAGCAUUGUACAGGGCUAUGA
NC_045512.2	99	116	110	115	7.35	hsa-miR-34b-5p_MIMAT0000685	1	17	2	7	3.16	-6.5	-17.01	-0.758529	GCUAGGGAGAGCUGCCUA&UAGGCAGUGUCAUUAGC	((((..((...(((((((&)))))))..))..))))	CAAUCUUUAAUCAGUGUGUAACAUUAGGGAGGACUUGAAAGAGCCACCACAUUUUCACCGAGGCCACGCGGAGUACGAUCGAGUGUACAGUGAACAAUGCUAGGGAGAGCUGCCUAUAUGGAAGAGCCCUAAUGUGUAAAAUUAAUUUUAGUAGUGCUAUCCCCAUGUGAUUUUAAUAGCUUCUUAGGAGAAUGACAAAAAAAAAAAAAAAAAAAAAAAAAAAAAAAAA	UAGGCAGUGUCAUUAGCUGAUUG
NC_045512.2	134	159	154	159	3.53	hsa-miR-585-5p_MIMAT0026618	2	17	2	7	0.3	-6.49	-10.32	-0.761311	GUGUAAAAUUAAUUUUAGUAGUGCUA&UAGCACACAGAUACGC	(((((........(((.((.((((((&))))))))))))))))	CAAUCUUUAAUCAGUGUGUAACAUUAGGGAGGACUUGAAAGAGCCACCACAUUUUCACCGAGGCCACGCGGAGUACGAUCGAGUGUACAGUGAACAAUGCUAGGGAGAGCUGCCUAUAUGGAAGAGCCCUAAUGUGUAAAAUUAAUUUUAGUAGUGCUAUCCCCAUGUGAUUUUAAUAGCUUCUUAGGAGAAUGACAAAAAAAAAAAAAAAAAAAAAAAAAAAAAAAAA	CUAGCACACAGAUACGCCCAGA
NC_045512.2	54	61	54	59	2.4	hsa-miR-27b-5p_MIMAT0004588	14	21	16	21	0.41	-6.48	-9.29	-0.760138	UUCACCGA&UUGGUGAA	((((((((&))))))))	CAAUCUUUAAUCAGUGUGUAACAUUAGGGAGGACUUGAAAGAGCCACCACAUUUUCACCGAGGCCACGCGGAGUACGAUCGAGUGUACAGUGAACAAUGCUAGGGAGAGCUGCCUAUAUGGAAGAGCCCUAAUGUGUAAAAUUAAUUUUAGUAGUGCUAUCCCCAUGUGAUUUUAAUAGCUUCUUAGGAGAAUGACAAAAAAAAAAAAAAAAAAAAAAAAAAAAAAAAA	AGAGCUUAGCUGAUUGGUGAAC
NC_045512.2	78	88	79	84	3.11	hsa-miR-597-5p_MIMAT0003265	4	13	7	12	3.64	-6.47	-13.22	-0.758965	AUCGAGUGUAC&GUCACUCGAU	((((((((.((&))))))))))	CAAUCUUUAAUCAGUGUGUAACAUUAGGGAGGACUUGAAAGAGCCACCACAUUUUCACCGAGGCCACGCGGAGUACGAUCGAGUGUACAGUGAACAAUGCUAGGGAGAGCUGCCUAUAUGGAAGAGCCCUAAUGUGUAAAAUUAAUUUUAGUAGUGCUAUCCCCAUGUGAUUUUAAUAGCUUCUUAGGAGAAUGACAAAAAAAAAAAAAAAAAAAAAAAAAAAAAAAAA	UGUGUCACUCGAUGACCACUGU
NC_045512.2	31	46	31	36	4.25	hsa-miR-193a-3p_MIMAT0000459	4	18	13	18	4.72	-6.44	-15.41	-0.755446	GGACUUGAAAGAGCCA&UGGCCUACAAAGUCC	((((((...((.((((&))))))...))))))	CAAUCUUUAAUCAGUGUGUAACAUUAGGGAGGACUUGAAAGAGCCACCACAUUUUCACCGAGGCCACGCGGAGUACGAUCGAGUGUACAGUGAACAAUGCUAGGGAGAGCUGCCUAUAUGGAAGAGCCCUAAUGUGUAAAAUUAAUUUUAGUAGUGCUAUCCCCAUGUGAUUUUAAUAGCUUCUUAGGAGAAUGACAAAAAAAAAAAAAAAAAAAAAAAAAAAAAAAAA	AACUGGCCUACAAAGUCCCAGU
NC_045512.2	150	170	165	170	4.81	hsa-miR-130a-5p_MIMAT0004593	8	22	8	13	0.88	-6.42	-12.11	-0.7531	AGUAGUGCUAUCCCCAUGUGA&UCACAUUGUGCUACU	((((((((.......((((((&)))))).))))))))	CAAUCUUUAAUCAGUGUGUAACAUUAGGGAGGACUUGAAAGAGCCACCACAUUUUCACCGAGGCCACGCGGAGUACGAUCGAGUGUACAGUGAACAAUGCUAGGGAGAGCUGCCUAUAUGGAAGAGCCCUAAUGUGUAAAAUUAAUUUUAGUAGUGCUAUCCCCAUGUGAUUUUAAUAGCUUCUUAGGAGAAUGACAAAAAAAAAAAAAAAAAAAAAAAAAAAAAAAAA	GCUCUUUUCACAUUGUGCUACU
NC_045512.2	108	116	110	115	3.95	hsa-miR-196a-5p_MIMAT0000226	1	9	2	7	0.16	-6.4	-10.51	-0.750754	AGCUGCCUA&UAGGUAGUU	(((((((((&)))))))))	CAAUCUUUAAUCAGUGUGUAACAUUAGGGAGGACUUGAAAGAGCCACCACAUUUUCACCGAGGCCACGCGGAGUACGAUCGAGUGUACAGUGAACAAUGCUAGGGAGAGCUGCCUAUAUGGAAGAGCCCUAAUGUGUAAAAUUAAUUUUAGUAGUGCUAUCCCCAUGUGAUUUUAAUAGCUUCUUAGGAGAAUGACAAAAAAAAAAAAAAAAAAAAAAAAAAAAAAAAA	UAGGUAGUUUCAUGUUGUUGGG
NC_045512.2	24	32	27	32	4.09	hsa-miR-659-5p_MIMAT0022710	6	14	6	11	3.06	-6.4	-13.55	-0.750754	UUAGGGAGG&CUUCCCUGA	(((((((((&)))))))))	CAAUCUUUAAUCAGUGUGUAACAUUAGGGAGGACUUGAAAGAGCCACCACAUUUUCACCGAGGCCACGCGGAGUACGAUCGAGUGUACAGUGAACAAUGCUAGGGAGAGCUGCCUAUAUGGAAGAGCCCUAAUGUGUAAAAUUAAUUUUAGUAGUGCUAUCCCCAUGUGAUUUUAAUAGCUUCUUAGGAGAAUGACAAAAAAAAAAAAAAAAAAAAAAAAAAAAAAAAA	AGGACCUUCCCUGAACCAAGGA
NC_045512.2	110	115	110	115	2.5	hsa-miR-1910-3p_MIMAT0026917	2	7	2	7	0.87	-6.37	-9.74	-0.755684	CUGCCU&AGGCAG	((((((&))))))	CAAUCUUUAAUCAGUGUGUAACAUUAGGGAGGACUUGAAAGAGCCACCACAUUUUCACCGAGGCCACGCGGAGUACGAUCGAGUGUACAGUGAACAAUGCUAGGGAGAGCUGCCUAUAUGGAAGAGCCCUAAUGUGUAAAAUUAAUUUUAGUAGUGCUAUCCCCAUGUGAUUUUAAUAGCUUCUUAGGAGAAUGACAAAAAAAAAAAAAAAAAAAAAAAAAAAAAAAAA	GAGGCAGAAGCAGGAUGACA
NC_045512.2	69	93	85	90	6.65	hsa-miR-486-5p_MIMAT0002177	1	20	3	8	0.47	-6.37	-13.49	-0.747235	CGGAGUACGAUCGAGUGUACAGUGA&UCCUGUACUGAGCUGCCCCG	(((.(((...((....((((((.((&)))))))).))..))).)))	CAAUCUUUAAUCAGUGUGUAACAUUAGGGAGGACUUGAAAGAGCCACCACAUUUUCACCGAGGCCACGCGGAGUACGAUCGAGUGUACAGUGAACAAUGCUAGGGAGAGCUGCCUAUAUGGAAGAGCCCUAAUGUGUAAAAUUAAUUUUAGUAGUGCUAUCCCCAUGUGAUUUUAAUAGCUUCUUAGGAGAAUGACAAAAAAAAAAAAAAAAAAAAAAAAAAAAAAAAA	UCCUGUACUGAGCUGCCCCGAG
NC_045512.2	108	113	108	113	1.44	hsa-miR-449c-5p_MIMAT0010251	18	23	18	23	1	-6.36	-8.8	-0.735039	AGCUGC&GCGGCU	((((((&))))))	CAAUCUUUAAUCAGUGUGUAACAUUAGGGAGGACUUGAAAGAGCCACCACAUUUUCACCGAGGCCACGCGGAGUACGAUCGAGUGUACAGUGAACAAUGCUAGGGAGAGCUGCCUAUAUGGAAGAGCCCUAAUGUGUAAAAUUAAUUUUAGUAGUGCUAUCCCCAUGUGAUUUUAAUAGCUUCUUAGGAGAAUGACAAAAAAAAAAAAAAAAAAAAAAAAAAAAAAAAA	UAGGCAGUGUAUUGCUAGCGGCUGU
NC_045512.2	97	113	97	102	5.8	hsa-miR-598-5p_MIMAT0026620	1	19	14	19	2.62	-6.36	-14.78	-0.742192	AUGCUAGGGAGAGCUGC&GCGGUGAUCCCGAUGGUGU	((((((((((...((((&))))...))))..))))))	CAAUCUUUAAUCAGUGUGUAACAUUAGGGAGGACUUGAAAGAGCCACCACAUUUUCACCGAGGCCACGCGGAGUACGAUCGAGUGUACAGUGAACAAUGCUAGGGAGAGCUGCCUAUAUGGAAGAGCCCUAAUGUGUAAAAUUAAUUUUAGUAGUGCUAUCCCCAUGUGAUUUUAAUAGCUUCUUAGGAGAAUGACAAAAAAAAAAAAAAAAAAAAAAAAAAAAAAAAA	GCGGUGAUCCCGAUGGUGUGAGC
NC_045512.2	10	22	10	15	2.1	hsa-miR-542-3p_MIMAT0003389	2	14	9	14	1.14	-6.35	-9.59	-0.744889	AUCAGUGUGUAAC&GUGACAGAUUGAU	((((((.((..((&))..)).))))))	CAAUCUUUAAUCAGUGUGUAACAUUAGGGAGGACUUGAAAGAGCCACCACAUUUUCACCGAGGCCACGCGGAGUACGAUCGAGUGUACAGUGAACAAUGCUAGGGAGAGCUGCCUAUAUGGAAGAGCCCUAAUGUGUAAAAUUAAUUUUAGUAGUGCUAUCCCCAUGUGAUUUUAAUAGCUUCUUAGGAGAAUGACAAAAAAAAAAAAAAAAAAAAAAAAAAAAAAAAA	UGUGACAGAUUGAUAACUGAAA
NC_045512.2	170	183	178	183	2.37	hsa-miR-1304-5p_MIMAT0005892	4	19	4	9	1.23	-6.32	-9.92	-0.741369	AUUUUAAUAGCUUC&GAGGCUACAGUGAGAU	((((((.(((((((&)))))))...))))))	CAAUCUUUAAUCAGUGUGUAACAUUAGGGAGGACUUGAAAGAGCCACCACAUUUUCACCGAGGCCACGCGGAGUACGAUCGAGUGUACAGUGAACAAUGCUAGGGAGAGCUGCCUAUAUGGAAGAGCCCUAAUGUGUAAAAUUAAUUUUAGUAGUGCUAUCCCCAUGUGAUUUUAAUAGCUUCUUAGGAGAAUGACAAAAAAAAAAAAAAAAAAAAAAAAAAAAAAAAA	UUUGAGGCUACAGUGAGAUGUG
NC_045512.2	119	134	129	134	3.78	hsa-miR-616-3p_MIMAT0004805	4	21	4	9	0.6	-6.32	-10.7	-0.741369	UGGAAGAGCCCUAAUG&CAUUGGAGGGUUUGAGCA	((..(((.((((((((&)))))).)).)))...))	CAAUCUUUAAUCAGUGUGUAACAUUAGGGAGGACUUGAAAGAGCCACCACAUUUUCACCGAGGCCACGCGGAGUACGAUCGAGUGUACAGUGAACAAUGCUAGGGAGAGCUGCCUAUAUGGAAGAGCCCUAAUGUGUAAAAUUAAUUUUAGUAGUGCUAUCCCCAUGUGAUUUUAAUAGCUUCUUAGGAGAAUGACAAAAAAAAAAAAAAAAAAAAAAAAAAAAAAAAA	AGUCAUUGGAGGGUUUGAGCAG
NC_045512.2	112	123	118	123	4.82	hsa-miR-146b-5p_MIMAT0002809	12	21	12	17	0.55	-6.31	-11.68	-0.736357	GCCUAUAUGGAA&UUCCAUAGGC	((((..((((((&))))))))))	CAAUCUUUAAUCAGUGUGUAACAUUAGGGAGGACUUGAAAGAGCCACCACAUUUUCACCGAGGCCACGCGGAGUACGAUCGAGUGUACAGUGAACAAUGCUAGGGAGAGCUGCCUAUAUGGAAGAGCCCUAAUGUGUAAAAUUAAUUUUAGUAGUGCUAUCCCCAUGUGAUUUUAAUAGCUUCUUAGGAGAAUGACAAAAAAAAAAAAAAAAAAAAAAAAAAAAAAAAA	UGAGAACUGAAUUCCAUAGGCUG
NC_045512.2	150	164	155	160	3.18	hsa-miR-182-5p_MIMAT0000259	4	18	8	13	0.67	-6.31	-10.16	-0.732718	AGUAGUGCUAUCCCC&GGCAAUGGUAGAACU	(((..((((((..((&))..))))))..)))	CAAUCUUUAAUCAGUGUGUAACAUUAGGGAGGACUUGAAAGAGCCACCACAUUUUCACCGAGGCCACGCGGAGUACGAUCGAGUGUACAGUGAACAAUGCUAGGGAGAGCUGCCUAUAUGGAAGAGCCCUAAUGUGUAAAAUUAAUUUUAGUAGUGCUAUCCCCAUGUGAUUUUAAUAGCUUCUUAGGAGAAUGACAAAAAAAAAAAAAAAAAAAAAAAAAAAAAAAAA	UUUGGCAAUGGUAGAACUCACACU
NC_045512.2	173	190	185	190	4.43	hsa-miR-155-3p_MIMAT0004658	1	20	1	6	0.1	-6.3	-10.83	-0.739023	UUAAUAGCUUCUUAGGAG&CUCCUACAUAUUAGCAUUAA	(((((.(((...((((((&))))))......))))))))	CAAUCUUUAAUCAGUGUGUAACAUUAGGGAGGACUUGAAAGAGCCACCACAUUUUCACCGAGGCCACGCGGAGUACGAUCGAGUGUACAGUGAACAAUGCUAGGGAGAGCUGCCUAUAUGGAAGAGCCCUAAUGUGUAAAAUUAAUUUUAGUAGUGCUAUCCCCAUGUGAUUUUAAUAGCUUCUUAGGAGAAUGACAAAAAAAAAAAAAAAAAAAAAAAAAAAAAAAAA	CUCCUACAUAUUAGCAUUAACA
NC_045512.2	55	64	55	60	3.84	hsa-miR-181a-5p_MIMAT0000256	11	21	16	21	3.01	-6.3	-13.15	-0.73519	UCACCGAGGC&GCUGUCGGUGA	(((((((.((&))..)))))))	CAAUCUUUAAUCAGUGUGUAACAUUAGGGAGGACUUGAAAGAGCCACCACAUUUUCACCGAGGCCACGCGGAGUACGAUCGAGUGUACAGUGAACAAUGCUAGGGAGAGCUGCCUAUAUGGAAGAGCCCUAAUGUGUAAAAUUAAUUUUAGUAGUGCUAUCCCCAUGUGAUUUUAAUAGCUUCUUAGGAGAAUGACAAAAAAAAAAAAAAAAAAAAAAAAAAAAAAAAA	AACAUUCAACGCUGUCGGUGAGU
NC_045512.2	84	102	84	89	4.75	hsa-miR-3064-5p_MIMAT0019864	3	20	15	20	1.46	-6.28	-12.49	-0.740719	UGUACAGUGAACAAUGCUA&UGGCUGUUGUGGUGUGCA	((((((....((((.((((&))))..))))..))))))	CAAUCUUUAAUCAGUGUGUAACAUUAGGGAGGACUUGAAAGAGCCACCACAUUUUCACCGAGGCCACGCGGAGUACGAUCGAGUGUACAGUGAACAAUGCUAGGGAGAGCUGCCUAUAUGGAAGAGCCCUAAUGUGUAAAAUUAAUUUUAGUAGUGCUAUCCCCAUGUGAUUUUAAUAGCUUCUUAGGAGAAUGACAAAAAAAAAAAAAAAAAAAAAAAAAAAAAAAAA	UCUGGCUGUUGUGGUGUGCAA
NC_045512.2	160	172	166	171	3.61	hsa-miR-487a-3p_MIMAT0002178	1	13	2	7	1.65	-6.28	-11.54	-0.736677	UCCCCAUGUGAUU&AAUCAUACAGGGA	((((..(((((((&)))))))..))))	CAAUCUUUAAUCAGUGUGUAACAUUAGGGAGGACUUGAAAGAGCCACCACAUUUUCACCGAGGCCACGCGGAGUACGAUCGAGUGUACAGUGAACAAUGCUAGGGAGAGCUGCCUAUAUGGAAGAGCCCUAAUGUGUAAAAUUAAUUUUAGUAGUGCUAUCCCCAUGUGAUUUUAAUAGCUUCUUAGGAGAAUGACAAAAAAAAAAAAAAAAAAAAAAAAAAAAAAAAA	AAUCAUACAGGGACAUCCAGUU
NC_045512.2	186	192	186	191	2.63	hsa-miR-3173-5p_MIMAT0019214	14	20	15	20	0.01	-6.27	-8.91	-0.735504	AGGAGAA&UUCUCCU	(((((((&)))))))	CAAUCUUUAAUCAGUGUGUAACAUUAGGGAGGACUUGAAAGAGCCACCACAUUUUCACCGAGGCCACGCGGAGUACGAUCGAGUGUACAGUGAACAAUGCUAGGGAGAGCUGCCUAUAUGGAAGAGCCCUAAUGUGUAAAAUUAAUUUUAGUAGUGCUAUCCCCAUGUGAUUUUAAUAGCUUCUUAGGAGAAUGACAAAAAAAAAAAAAAAAAAAAAAAAAAAAAAAAA	UGCCCUGCCUGUUUUCUCCUUU
NC_045512.2	58	71	61	66	5.33	hsa-miR-4786-3p_MIMAT0019955	6	21	13	18	4.69	-6.26	-16.28	-0.734331	CCGAGGCCACGCGG&CCAGCUCUGGUCUGGG	((.((((((.((((&)).))..)))))).))	CAAUCUUUAAUCAGUGUGUAACAUUAGGGAGGACUUGAAAGAGCCACCACAUUUUCACCGAGGCCACGCGGAGUACGAUCGAGUGUACAGUGAACAAUGCUAGGGAGAGCUGCCUAUAUGGAAGAGCCCUAAUGUGUAAAAUUAAUUUUAGUAGUGCUAUCCCCAUGUGAUUUUAAUAGCUUCUUAGGAGAAUGACAAAAAAAAAAAAAAAAAAAAAAAAAAAAAAAAA	UGAAGCCAGCUCUGGUCUGGGC
NC_045512.2	46	63	58	63	5.63	hsa-miR-362-5p_MIMAT0000705	4	24	4	9	2.46	-6.25	-14.34	-0.72575	ACCACAUUUUCACCGAGG&CCUUGGAACCUAGGUGUGAGU	(((((((((...((((((&)))))).....))))))).))	CAAUCUUUAAUCAGUGUGUAACAUUAGGGAGGACUUGAAAGAGCCACCACAUUUUCACCGAGGCCACGCGGAGUACGAUCGAGUGUACAGUGAACAAUGCUAGGGAGAGCUGCCUAUAUGGAAGAGCCCUAAUGUGUAAAAUUAAUUUUAGUAGUGCUAUCCCCAUGUGAUUUUAAUAGCUUCUUAGGAGAAUGACAAAAAAAAAAAAAAAAAAAAAAAAAAAAAAAAA	AAUCCUUGGAACCUAGGUGUGAGU
NC_045512.2	17	31	26	31	5.51	hsa-miR-4684-5p_MIMAT0019769	1	17	1	6	0.37	-6.25	-12.13	-0.733158	UGUAACAUUAGGGAG&CUCUCUACUGACUUGCA	(((((((.(((((((&))))))).))..)))))	CAAUCUUUAAUCAGUGUGUAACAUUAGGGAGGACUUGAAAGAGCCACCACAUUUUCACCGAGGCCACGCGGAGUACGAUCGAGUGUACAGUGAACAAUGCUAGGGAGAGCUGCCUAUAUGGAAGAGCCCUAAUGUGUAAAAUUAAUUUUAGUAGUGCUAUCCCCAUGUGAUUUUAAUAGCUUCUUAGGAGAAUGACAAAAAAAAAAAAAAAAAAAAAAAAAAAAAAAAA	CUCUCUACUGACUUGCAACAUA
NC_045512.2	102	108	103	108	3.81	hsa-miR-615-3p_MIMAT0003283	13	19	13	18	1.12	-6.25	-11.18	-0.733158	AGGGAGA&UCUCCCU	(((((((&)))))))	CAAUCUUUAAUCAGUGUGUAACAUUAGGGAGGACUUGAAAGAGCCACCACAUUUUCACCGAGGCCACGCGGAGUACGAUCGAGUGUACAGUGAACAAUGCUAGGGAGAGCUGCCUAUAUGGAAGAGCCCUAAUGUGUAAAAUUAAUUUUAGUAGUGCUAUCCCCAUGUGAUUUUAAUAGCUUCUUAGGAGAAUGACAAAAAAAAAAAAAAAAAAAAAAAAAAAAAAAAA	UCCGAGCCUGGGUCUCCCUCUU
NC_045512.2	126	139	134	139	2.51	hsa-miR-92a-3p_MIMAT0000092	3	18	3	8	0.46	-6.24	-9.21	-0.731985	GCCCUAAUGUGUAA&UUGCACUUGUCCCGGC	(((.....((((((&)))))).......)))	CAAUCUUUAAUCAGUGUGUAACAUUAGGGAGGACUUGAAAGAGCCACCACAUUUUCACCGAGGCCACGCGGAGUACGAUCGAGUGUACAGUGAACAAUGCUAGGGAGAGCUGCCUAUAUGGAAGAGCCCUAAUGUGUAAAAUUAAUUUUAGUAGUGCUAUCCCCAUGUGAUUUUAAUAGCUUCUUAGGAGAAUGACAAAAAAAAAAAAAAAAAAAAAAAAAAAAAAAAA	UAUUGCACUUGUCCCGGCCUGU
NC_045512.2	12	18	13	18	1.71	hsa-miR-3064-3p_MIMAT0019865	5	11	5	10	2.02	-6.23	-9.96	-0.727021	CAGUGUG&CACACUG	(((((((&)))))))	CAAUCUUUAAUCAGUGUGUAACAUUAGGGAGGACUUGAAAGAGCCACCACAUUUUCACCGAGGCCACGCGGAGUACGAUCGAGUGUACAGUGAACAAUGCUAGGGAGAGCUGCCUAUAUGGAAGAGCCCUAAUGUGUAAAAUUAAUUUUAGUAGUGCUAUCCCCAUGUGAUUUUAAUAGCUUCUUAGGAGAAUGACAAAAAAAAAAAAAAAAAAAAAAAAAAAAAAAAA	UUGCCACACUGCAACACCUUACA
NC_045512.2	113	128	117	122	5.61	hsa-miR-889-5p_MIMAT0026719	4	20	9	14	2.43	-6.23	-14.27	-0.730812	CCUAUAUGGAAGAGCC&GGCUGUCCGUAGUAUGG	((..((((((..((((&)))).))))))....))	CAAUCUUUAAUCAGUGUGUAACAUUAGGGAGGACUUGAAAGAGCCACCACAUUUUCACCGAGGCCACGCGGAGUACGAUCGAGUGUACAGUGAACAAUGCUAGGGAGAGCUGCCUAUAUGGAAGAGCCCUAAUGUGUAAAAUUAAUUUUAGUAGUGCUAUCCCCAUGUGAUUUUAAUAGCUUCUUAGGAGAAUGACAAAAAAAAAAAAAAAAAAAAAAAAAAAAAAAAA	AAUGGCUGUCCGUAGUAUGGUC
NC_045512.2	57	65	58	63	3.9	hsa-miR-548j-5p_MIMAT0005875	13	22	16	21	0.47	-6.22	-10.59	-0.729639	ACCGAGGCC&GGUCUUUGGU	(((((((((&)).)))))))	CAAUCUUUAAUCAGUGUGUAACAUUAGGGAGGACUUGAAAGAGCCACCACAUUUUCACCGAGGCCACGCGGAGUACGAUCGAGUGUACAGUGAACAAUGCUAGGGAGAGCUGCCUAUAUGGAAGAGCCCUAAUGUGUAAAAUUAAUUUUAGUAGUGCUAUCCCCAUGUGAUUUUAAUAGCUUCUUAGGAGAAUGACAAAAAAAAAAAAAAAAAAAAAAAAAAAAAAAAA	AAAAGUAAUUGCGGUCUUUGGU
NC_045512.2	104	110	105	110	4	hsa-miR-26b-3p_MIMAT0004500	4	10	4	9	1.46	-6.21	-11.67	-0.732463	GGAGAGC&GUUCUCC	(((((((&)))))))	CAAUCUUUAAUCAGUGUGUAACAUUAGGGAGGACUUGAAAGAGCCACCACAUUUUCACCGAGGCCACGCGGAGUACGAUCGAGUGUACAGUGAACAAUGCUAGGGAGAGCUGCCUAUAUGGAAGAGCCCUAAUGUGUAAAAUUAAUUUUAGUAGUGCUAUCCCCAUGUGAUUUUAAUAGCUUCUUAGGAGAAUGACAAAAAAAAAAAAAAAAAAAAAAAAAAAAAAAAA	CCUGUUCUCCAUUACUUGGCU
NC_045512.2	13	30	14	19	4.26	hsa-miR-202-5p_MIMAT0002810	1	16	10	15	0.03	-6.2	-10.49	-0.727293	AGUGUGUAACAUUAGGGA&UUCCUAUGCAUAUACU	(((((((..((.((((((&)))))))).)))))))	CAAUCUUUAAUCAGUGUGUAACAUUAGGGAGGACUUGAAAGAGCCACCACAUUUUCACCGAGGCCACGCGGAGUACGAUCGAGUGUACAGUGAACAAUGCUAGGGAGAGCUGCCUAUAUGGAAGAGCCCUAAUGUGUAAAAUUAAUUUUAGUAGUGCUAUCCCCAUGUGAUUUUAAUAGCUUCUUAGGAGAAUGACAAAAAAAAAAAAAAAAAAAAAAAAAAAAAAAAA	UUCCUAUGCAUAUACUUCUUUG
NC_045512.2	73	91	86	91	5.19	hsa-miR-548g-3p_MIMAT0005912	4	22	4	9	0.66	-6.2	-12.05	-0.727293	GUACGAUCGAGUGUACAGU&ACUGUAAUUACUUUUGUAC	((((((.......((((((&)))))).......))))))	CAAUCUUUAAUCAGUGUGUAACAUUAGGGAGGACUUGAAAGAGCCACCACAUUUUCACCGAGGCCACGCGGAGUACGAUCGAGUGUACAGUGAACAAUGCUAGGGAGAGCUGCCUAUAUGGAAGAGCCCUAAUGUGUAAAAUUAAUUUUAGUAGUGCUAUCCCCAUGUGAUUUUAAUAGCUUCUUAGGAGAAUGACAAAAAAAAAAAAAAAAAAAAAAAAAAAAAAAAA	AAAACUGUAAUUACUUUUGUAC
NC_045512.2	64	69	64	69	2.68	hsa-let-7b-5p_MIMAT0000063	15	20	15	20	0.05	-6.19	-8.92	-0.72612	CCACGC&GUGUGG	((((((&))))))	CAAUCUUUAAUCAGUGUGUAACAUUAGGGAGGACUUGAAAGAGCCACCACAUUUUCACCGAGGCCACGCGGAGUACGAUCGAGUGUACAGUGAACAAUGCUAGGGAGAGCUGCCUAUAUGGAAGAGCCCUAAUGUGUAAAAUUAAUUUUAGUAGUGCUAUCCCCAUGUGAUUUUAAUAGCUUCUUAGGAGAAUGACAAAAAAAAAAAAAAAAAAAAAAAAAAAAAAAAA	UGAGGUAGUAGGUUGUGUGGUU
NC_045512.2	178	193	186	191	5.05	hsa-miR-186-5p_MIMAT0000456	7	22	9	14	2.11	-6.19	-13.35	-0.72612	AGCUUCUUAGGAGAAU&AUUCUCCUUUUGGGCU	(((.....((((((((&)))))))).....)))	CAAUCUUUAAUCAGUGUGUAACAUUAGGGAGGACUUGAAAGAGCCACCACAUUUUCACCGAGGCCACGCGGAGUACGAUCGAGUGUACAGUGAACAAUGCUAGGGAGAGCUGCCUAUAUGGAAGAGCCCUAAUGUGUAAAAUUAAUUUUAGUAGUGCUAUCCCCAUGUGAUUUUAAUAGCUUCUUAGGAGAAUGACAAAAAAAAAAAAAAAAAAAAAAAAAAAAAAAAA	CAAAGAAUUCUCCUUUUGGGCU
NC_045512.2	174	185	180	185	2.88	hsa-miR-506-5p_MIMAT0022701	6	17	6	11	1.08	-6.19	-10.15	-0.72612	UAAUAGCUUCUU&AGGAAGGUGUUA	(((((.((((((&)))))).)))))	CAAUCUUUAAUCAGUGUGUAACAUUAGGGAGGACUUGAAAGAGCCACCACAUUUUCACCGAGGCCACGCGGAGUACGAUCGAGUGUACAGUGAACAAUGCUAGGGAGAGCUGCCUAUAUGGAAGAGCCCUAAUGUGUAAAAUUAAUUUUAGUAGUGCUAUCCCCAUGUGAUUUUAAUAGCUUCUUAGGAGAAUGACAAAAAAAAAAAAAAAAAAAAAAAAAAAAAAAAA	UAUUCAGGAAGGUGUUACUUAA
NC_045512.2	106	111	106	111	1.75	hsa-miR-4661-5p_MIMAT0019729	5	10	5	10	0.42	-6.18	-8.35	-0.724947	AGAGCU&AGCUCU	((((((&))))))	CAAUCUUUAAUCAGUGUGUAACAUUAGGGAGGACUUGAAAGAGCCACCACAUUUUCACCGAGGCCACGCGGAGUACGAUCGAGUGUACAGUGAACAAUGCUAGGGAGAGCUGCCUAUAUGGAAGAGCCCUAAUGUGUAAAAUUAAUUUUAGUAGUGCUAUCCCCAUGUGAUUUUAAUAGCUUCUUAGGAGAAUGACAAAAAAAAAAAAAAAAAAAAAAAAAAAAAAAAA	AACUAGCUCUGUGGAUCCUGAC
NC_045512.2	162	168	163	168	2.8	hsa-miR-5583-3p_MIMAT0022282	3	9	3	8	0.44	-6.18	-9.42	-0.724947	CCCAUGU&AUAUGGG	(((((((&)))))))	CAAUCUUUAAUCAGUGUGUAACAUUAGGGAGGACUUGAAAGAGCCACCACAUUUUCACCGAGGCCACGCGGAGUACGAUCGAGUGUACAGUGAACAAUGCUAGGGAGAGCUGCCUAUAUGGAAGAGCCCUAAUGUGUAAAAUUAAUUUUAGUAGUGCUAUCCCCAUGUGAUUUUAAUAGCUUCUUAGGAGAAUGACAAAAAAAAAAAAAAAAAAAAAAAAAAAAAAAAA	GAAUAUGGGUAUAUUAGUUUGG
NC_045512.2	102	109	104	109	4	hsa-miR-6833-3p_MIMAT0027567	6	14	6	11	0	-6.18	-10.18	-0.728924	AGGGAGAG&CUCUCCACU	((((((((&)))))).))	CAAUCUUUAAUCAGUGUGUAACAUUAGGGAGGACUUGAAAGAGCCACCACAUUUUCACCGAGGCCACGCGGAGUACGAUCGAGUGUACAGUGAACAAUGCUAGGGAGAGCUGCCUAUAUGGAAGAGCCCUAAUGUGUAAAAUUAAUUUUAGUAGUGCUAUCCCCAUGUGAUUUUAAUAGCUUCUUAGGAGAAUGACAAAAAAAAAAAAAAAAAAAAAAAAAAAAAAAAA	UUUCUCUCUCCACUUCCUCAG
NC_045512.2	125	139	133	138	2.55	hsa-miR-660-5p_MIMAT0003338	7	21	8	13	1.06	-6.17	-9.78	-0.723774	AGCCCUAAUGUGUAA&UUGCAUAUCGGAGUU	(((((..((((((((&)))))))).)).)))	CAAUCUUUAAUCAGUGUGUAACAUUAGGGAGGACUUGAAAGAGCCACCACAUUUUCACCGAGGCCACGCGGAGUACGAUCGAGUGUACAGUGAACAAUGCUAGGGAGAGCUGCCUAUAUGGAAGAGCCCUAAUGUGUAAAAUUAAUUUUAGUAGUGCUAUCCCCAUGUGAUUUUAAUAGCUUCUUAGGAGAAUGACAAAAAAAAAAAAAAAAAAAAAAAAAAAAAAAAA	UACCCAUUGCAUAUCGGAGUUG
NC_045512.2	81	87	81	86	2.74	hsa-miR-30b-5p_MIMAT0000420	12	18	13	18	0.6	-6.16	-9.5	-0.722601	GAGUGUA&UACACUC	(((((((&)))))))	CAAUCUUUAAUCAGUGUGUAACAUUAGGGAGGACUUGAAAGAGCCACCACAUUUUCACCGAGGCCACGCGGAGUACGAUCGAGUGUACAGUGAACAAUGCUAGGGAGAGCUGCCUAUAUGGAAGAGCCCUAAUGUGUAAAAUUAAUUUUAGUAGUGCUAUCCCCAUGUGAUUUUAAUAGCUUCUUAGGAGAAUGACAAAAAAAAAAAAAAAAAAAAAAAAAAAAAAAAA	UGUAAACAUCCUACACUCAGCU
NC_045512.2	77	83	77	82	1.23	hsa-miR-218-5p_MIMAT0000275	6	12	7	12	0.28	-6.15	-7.66	-0.725386	GAUCGAG&CUUGAUC	(((((((&)))))))	CAAUCUUUAAUCAGUGUGUAACAUUAGGGAGGACUUGAAAGAGCCACCACAUUUUCACCGAGGCCACGCGGAGUACGAUCGAGUGUACAGUGAACAAUGCUAGGGAGAGCUGCCUAUAUGGAAGAGCCCUAAUGUGUAAAAUUAAUUUUAGUAGUGCUAUCCCCAUGUGAUUUUAAUAGCUUCUUAGGAGAAUGACAAAAAAAAAAAAAAAAAAAAAAAAAAAAAAAAA	UUGUGCUUGAUCUAACCAUGU
NC_045512.2	150	160	154	159	2.76	hsa-miR-488-5p_MIMAT0002804	9	18	10	15	1.69	-6.15	-10.6	-0.725386	AGUAGUGCUAU&AUGGCACUCU	((.((((((((&))))))))))	CAAUCUUUAAUCAGUGUGUAACAUUAGGGAGGACUUGAAAGAGCCACCACAUUUUCACCGAGGCCACGCGGAGUACGAUCGAGUGUACAGUGAACAAUGCUAGGGAGAGCUGCCUAUAUGGAAGAGCCCUAAUGUGUAAAAUUAAUUUUAGUAGUGCUAUCCCCAUGUGAUUUUAAUAGCUUCUUAGGAGAAUGACAAAAAAAAAAAAAAAAAAAAAAAAAAAAAAAAA	CCCAGAUAAUGGCACUCUCAA
NC_045512.2	193	199	193	198	0.6	hsa-miR-223-3p_MIMAT0000280	7	13	8	13	0.34	-6.14	-7.08	-0.720255	UGACAAA&UUUGUCA	(((((((&)))))))	CAAUCUUUAAUCAGUGUGUAACAUUAGGGAGGACUUGAAAGAGCCACCACAUUUUCACCGAGGCCACGCGGAGUACGAUCGAGUGUACAGUGAACAAUGCUAGGGAGAGCUGCCUAUAUGGAAGAGCCCUAAUGUGUAAAAUUAAUUUUAGUAGUGCUAUCCCCAUGUGAUUUUAAUAGCUUCUUAGGAGAAUGACAAAAAAAAAAAAAAAAAAAAAAAAAAAAAAAAA	UGUCAGUUUGUCAAAUACCCCA
NC_045512.2	179	190	185	190	4.35	hsa-miR-337-3p_MIMAT0000754	1	14	1	6	0.28	-6.14	-10.77	-0.720255	GCUUCUUAGGAG&CUCCUAUAUGAUGC	((.((.((((((&))))))...)).))	CAAUCUUUAAUCAGUGUGUAACAUUAGGGAGGACUUGAAAGAGCCACCACAUUUUCACCGAGGCCACGCGGAGUACGAUCGAGUGUACAGUGAACAAUGCUAGGGAGAGCUGCCUAUAUGGAAGAGCCCUAAUGUGUAAAAUUAAUUUUAGUAGUGCUAUCCCCAUGUGAUUUUAAUAGCUUCUUAGGAGAAUGACAAAAAAAAAAAAAAAAAAAAAAAAAAAAAAAAA	CUCCUAUAUGAUGCCUUUCUUC
NC_045512.2	40	47	42	47	1.57	hsa-miR-132-5p_MIMAT0004594	4	11	4	9	4.19	-6.13	-11.89	-0.719081	AGAGCCAC&GUGGCUUU	((((((((&))))))))	CAAUCUUUAAUCAGUGUGUAACAUUAGGGAGGACUUGAAAGAGCCACCACAUUUUCACCGAGGCCACGCGGAGUACGAUCGAGUGUACAGUGAACAAUGCUAGGGAGAGCUGCCUAUAUGGAAGAGCCCUAAUGUGUAAAAUUAAUUUUAGUAGUGCUAUCCCCAUGUGAUUUUAAUAGCUUCUUAGGAGAAUGACAAAAAAAAAAAAAAAAAAAAAAAAAAAAAAAAA	ACCGUGGCUUUCGAUUGUUACU
NC_045512.2	95	115	110	115	6.83	hsa-miR-25-5p_MIMAT0004498	1	21	1	6	1.38	-6.13	-14.34	-0.723027	CAAUGCUAGGGAGAGCUGCCU&AGGCGGAGACUUGGGCAAUUG	((((((((((.....((((((&))))))...))))).)).)))	CAAUCUUUAAUCAGUGUGUAACAUUAGGGAGGACUUGAAAGAGCCACCACAUUUUCACCGAGGCCACGCGGAGUACGAUCGAGUGUACAGUGAACAAUGCUAGGGAGAGCUGCCUAUAUGGAAGAGCCCUAAUGUGUAAAAUUAAUUUUAGUAGUGCUAUCCCCAUGUGAUUUUAAUAGCUUCUUAGGAGAAUGACAAAAAAAAAAAAAAAAAAAAAAAAAAAAAAAAA	AGGCGGAGACUUGGGCAAUUG
NC_045512.2	136	159	154	159	3.37	hsa-miR-96-5p_MIMAT0000095	3	22	3	8	2.67	-6.13	-12.17	-0.715351	GUAAAAUUAAUUUUAGUAGUGCUA&UGGCACUAGCACAUUUUUGC	((((((..........((((((((&))))))))......))))))	CAAUCUUUAAUCAGUGUGUAACAUUAGGGAGGACUUGAAAGAGCCACCACAUUUUCACCGAGGCCACGCGGAGUACGAUCGAGUGUACAGUGAACAAUGCUAGGGAGAGCUGCCUAUAUGGAAGAGCCCUAAUGUGUAAAAUUAAUUUUAGUAGUGCUAUCCCCAUGUGAUUUUAAUAGCUUCUUAGGAGAAUGACAAAAAAAAAAAAAAAAAAAAAAAAAAAAAAAAA	UUUGGCACUAGCACAUUUUUGCU
NC_045512.2	64	86	81	86	7.03	hsa-miR-181b-5p_MIMAT0000257	2	22	2	7	3.8	-6.12	-16.95	-0.714184	CCACGCGGAGUACGAUCGAGUGU&ACAUUCAUUGCUGUCGGUGGG	((.(((.((...((((.((((((&))))))))))...)).)))))	CAAUCUUUAAUCAGUGUGUAACAUUAGGGAGGACUUGAAAGAGCCACCACAUUUUCACCGAGGCCACGCGGAGUACGAUCGAGUGUACAGUGAACAAUGCUAGGGAGAGCUGCCUAUAUGGAAGAGCCCUAAUGUGUAAAAUUAAUUUUAGUAGUGCUAUCCCCAUGUGAUUUUAAUAGCUUCUUAGGAGAAUGACAAAAAAAAAAAAAAAAAAAAAAAAAAAAAAAAA	AACAUUCAUUGCUGUCGGUGGGU
NC_045512.2	16	44	17	22	6.99	hsa-miR-208a-5p_MIMAT0026474	3	22	16	21	1.73	-6.11	-14.83	-0.716735	GUGUAACAUUAGGGAGGACUUGAAAGAGC&GCUUUUGGCCCGGGUUAUAC	(((((((....(((.........((((((&))))))..)))..)))))))	CAAUCUUUAAUCAGUGUGUAACAUUAGGGAGGACUUGAAAGAGCCACCACAUUUUCACCGAGGCCACGCGGAGUACGAUCGAGUGUACAGUGAACAAUGCUAGGGAGAGCUGCCUAUAUGGAAGAGCCCUAAUGUGUAAAAUUAAUUUUAGUAGUGCUAUCCCCAUGUGAUUUUAAUAGCUUCUUAGGAGAAUGACAAAAAAAAAAAAAAAAAAAAAAAAAAAAAAAAA	GAGCUUUUGGCCCGGGUUAUAC
NC_045512.2	190	199	190	195	0.62	hsa-miR-375-3p_MIMAT0000728	1	11	6	11	0.83	-6.11	-7.56	-0.716735	GAAUGACAAA&UUUGUUCGUUC	((((((((((&)))).))))))	CAAUCUUUAAUCAGUGUGUAACAUUAGGGAGGACUUGAAAGAGCCACCACAUUUUCACCGAGGCCACGCGGAGUACGAUCGAGUGUACAGUGAACAAUGCUAGGGAGAGCUGCCUAUAUGGAAGAGCCCUAAUGUGUAAAAUUAAUUUUAGUAGUGCUAUCCCCAUGUGAUUUUAAUAGCUUCUUAGGAGAAUGACAAAAAAAAAAAAAAAAAAAAAAAAAAAAAAAAA	UUUGUUCGUUCGGCUCGCGUGA
NC_045512.2	45	53	48	53	2.48	hsa-miR-574-5p_MIMAT0004795	3	12	3	8	0.01	-6.11	-8.6	-0.713017	CACCACAUU&AGUGUGUGUG	(((((((((&)))))).)))	CAAUCUUUAAUCAGUGUGUAACAUUAGGGAGGACUUGAAAGAGCCACCACAUUUUCACCGAGGCCACGCGGAGUACGAUCGAGUGUACAGUGAACAAUGCUAGGGAGAGCUGCCUAUAUGGAAGAGCCCUAAUGUGUAAAAUUAAUUUUAGUAGUGCUAUCCCCAUGUGAUUUUAAUAGCUUCUUAGGAGAAUGACAAAAAAAAAAAAAAAAAAAAAAAAAAAAAAAAA	UGAGUGUGUGUGUGUGAGUGUGU
NC_045512.2	103	109	103	108	3.97	hsa-miR-98-3p_MIMAT0022842	16	22	17	22	0	-6.1	-10.07	-0.715562	GGGAGAG&CUUUCCC	(((((((&)))))))	CAAUCUUUAAUCAGUGUGUAACAUUAGGGAGGACUUGAAAGAGCCACCACAUUUUCACCGAGGCCACGCGGAGUACGAUCGAGUGUACAGUGAACAAUGCUAGGGAGAGCUGCCUAUAUGGAAGAGCCCUAAUGUGUAAAAUUAAUUUUAGUAGUGCUAUCCCCAUGUGAUUUUAAUAGCUUCUUAGGAGAAUGACAAAAAAAAAAAAAAAAAAAAAAAAAAAAAAAAA	CUAUACAACUUACUACUUUCCC
NC_045512.2	81	87	81	86	2.74	hsa-miR-30c-5p_MIMAT0000244	12	18	13	18	0.61	-6.08	-9.43	-0.709516	GAGUGUA&UACACUC	(((((((&)))))))	CAAUCUUUAAUCAGUGUGUAACAUUAGGGAGGACUUGAAAGAGCCACCACAUUUUCACCGAGGCCACGCGGAGUACGAUCGAGUGUACAGUGAACAAUGCUAGGGAGAGCUGCCUAUAUGGAAGAGCCCUAAUGUGUAAAAUUAAUUUUAGUAGUGCUAUCCCCAUGUGAUUUUAAUAGCUUCUUAGGAGAAUGACAAAAAAAAAAAAAAAAAAAAAAAAAAAAAAAAA	UGUAAACAUCCUACACUCUCAGC
NC_045512.2	43	53	48	53	2.81	hsa-miR-122b-5p_MIMAT0019876	4	17	4	9	0.59	-6.07	-9.47	-0.708349	GCCACCACAUU&AGUGUGAUAAUGGC	((((.((((((&))))))....))))	CAAUCUUUAAUCAGUGUGUAACAUUAGGGAGGACUUGAAAGAGCCACCACAUUUUCACCGAGGCCACGCGGAGUACGAUCGAGUGUACAGUGAACAAUGCUAGGGAGAGCUGCCUAUAUGGAAGAGCCCUAAUGUGUAAAAUUAAUUUUAGUAGUGCUAUCCCCAUGUGAUUUUAAUAGCUUCUUAGGAGAAUGACAAAAAAAAAAAAAAAAAAAAAAAAAAAAAAAAA	UUUAGUGUGAUAAUGGCGUUUGA
NC_045512.2	59	68	63	68	3.6	hsa-miR-132-5p_MIMAT0004594	3	13	3	8	4.2	-6.07	-13.87	-0.712043	CGAGGCCACG&CGUGGCUUUCG	((((((((((&)))))))).))	CAAUCUUUAAUCAGUGUGUAACAUUAGGGAGGACUUGAAAGAGCCACCACAUUUUCACCGAGGCCACGCGGAGUACGAUCGAGUGUACAGUGAACAAUGCUAGGGAGAGCUGCCUAUAUGGAAGAGCCCUAAUGUGUAAAAUUAAUUUUAGUAGUGCUAUCCCCAUGUGAUUUUAAUAGCUUCUUAGGAGAAUGACAAAAAAAAAAAAAAAAAAAAAAAAAAAAAAAAA	ACCGUGGCUUUCGAUUGUUACU
NC_045512.2	15	22	17	22	1.31	hsa-let-7d-5p_MIMAT0000065	12	19	12	17	0.86	-6.06	-8.23	-0.71087	UGUGUAAC&GUUGCAUA	((((((((&))))))))	CAAUCUUUAAUCAGUGUGUAACAUUAGGGAGGACUUGAAAGAGCCACCACAUUUUCACCGAGGCCACGCGGAGUACGAUCGAGUGUACAGUGAACAAUGCUAGGGAGAGCUGCCUAUAUGGAAGAGCCCUAAUGUGUAAAAUUAAUUUUAGUAGUGCUAUCCCCAUGUGAUUUUAAUAGCUUCUUAGGAGAAUGACAAAAAAAAAAAAAAAAAAAAAAAAAAAAAAAAA	AGAGGUAGUAGGUUGCAUAGUU
NC_045512.2	180	189	182	187	3.79	hsa-miR-513c-3p_MIMAT0022728	13	22	15	20	1.95	-6.06	-11.8	-0.707183	CUUCUUAGGA&UUCUGAGAAG	((((((((((&))))))))))	CAAUCUUUAAUCAGUGUGUAACAUUAGGGAGGACUUGAAAGAGCCACCACAUUUUCACCGAGGCCACGCGGAGUACGAUCGAGUGUACAGUGAACAAUGCUAGGGAGAGCUGCCUAUAUGGAAGAGCCCUAAUGUGUAAAAUUAAUUUUAGUAGUGCUAUCCCCAUGUGAUUUUAAUAGCUUCUUAGGAGAAUGACAAAAAAAAAAAAAAAAAAAAAAAAAAAAAAAAA	UAAAUUUCACCUUUCUGAGAAGA
NC_045512.2	26	36	26	31	4.07	hsa-miR-520b-3p_MIMAT0002843	2	12	7	12	2.96	-6.04	-13.07	-0.712412	AGGGAGGACUU&AAGUGCUUCCU	((((((.((((&)))).))))))	CAAUCUUUAAUCAGUGUGUAACAUUAGGGAGGACUUGAAAGAGCCACCACAUUUUCACCGAGGCCACGCGGAGUACGAUCGAGUGUACAGUGAACAAUGCUAGGGAGAGCUGCCUAUAUGGAAGAGCCCUAAUGUGUAAAAUUAAUUUUAGUAGUGCUAUCCCCAUGUGAUUUUAAUAGCUUCUUAGGAGAAUGACAAAAAAAAAAAAAAAAAAAAAAAAAAAAAAAAA	AAAGUGCUUCCUUUUAGAGGG
NC_045512.2	87	108	98	103	7.73	hsa-miR-216a-5p_MIMAT0000273	4	20	10	15	2.06	-6.02	-15.81	-0.706178	ACAGUGAACAAUGCUAGGGAGA&UCUCAGCUGGCAACUGU	(((((......((((((.((((&))))..)))))))))))	CAAUCUUUAAUCAGUGUGUAACAUUAGGGAGGACUUGAAAGAGCCACCACAUUUUCACCGAGGCCACGCGGAGUACGAUCGAGUGUACAGUGAACAAUGCUAGGGAGAGCUGCCUAUAUGGAAGAGCCCUAAUGUGUAAAAUUAAUUUUAGUAGUGCUAUCCCCAUGUGAUUUUAAUAGCUUCUUAGGAGAAUGACAAAAAAAAAAAAAAAAAAAAAAAAAAAAAAAAA	UAAUCUCAGCUGGCAACUGUGA
NC_045512.2	177	183	178	183	2.18	hsa-miR-2115-3p_MIMAT0011159	15	21	15	20	0.37	-6.02	-8.57	-0.706178	UAGCUUC&GAGGCUA	(((((((&)))))))	CAAUCUUUAAUCAGUGUGUAACAUUAGGGAGGACUUGAAAGAGCCACCACAUUUUCACCGAGGCCACGCGGAGUACGAUCGAGUGUACAGUGAACAAUGCUAGGGAGAGCUGCCUAUAUGGAAGAGCCCUAAUGUGUAAAAUUAAUUUUAGUAGUGCUAUCCCCAUGUGAUUUUAAUAGCUUCUUAGGAGAAUGACAAAAAAAAAAAAAAAAAAAAAAAAAAAAAAAAA	CAUCAGAAUUCAUGGAGGCUAG
NC_045512.2	41	46	41	46	1.23	hsa-miR-2467-5p_MIMAT0019952	18	23	18	23	1.67	-6.02	-8.92	-0.702515	GAGCCA&UGGCUC	((((((&))))))	CAAUCUUUAAUCAGUGUGUAACAUUAGGGAGGACUUGAAAGAGCCACCACAUUUUCACCGAGGCCACGCGGAGUACGAUCGAGUGUACAGUGAACAAUGCUAGGGAGAGCUGCCUAUAUGGAAGAGCCCUAAUGUGUAAAAUUAAUUUUAGUAGUGCUAUCCCCAUGUGAUUUUAAUAGCUUCUUAGGAGAAUGACAAAAAAAAAAAAAAAAAAAAAAAAAAAAAAAAA	UGAGGCUCUGUUAGCCUUGGCUC
NC_045512.2	157	163	157	162	2.74	hsa-miR-135a-2-3p_MIMAT0037309	6	12	7	12	2.19	-6	-10.93	-0.703832	CUAUCCC&GGGAUGG	(((((((&)))))))	CAAUCUUUAAUCAGUGUGUAACAUUAGGGAGGACUUGAAAGAGCCACCACAUUUUCACCGAGGCCACGCGGAGUACGAUCGAGUGUACAGUGAACAAUGCUAGGGAGAGCUGCCUAUAUGGAAGAGCCCUAAUGUGUAAAAUUAAUUUUAGUAGUGCUAUCCCCAUGUGAUUUUAAUAGCUUCUUAGGAGAAUGACAAAAAAAAAAAAAAAAAAAAAAAAAAAAAAAAA	AUGUAGGGAUGGAAGCCAUGAA
NC_045512.2	106	111	106	111	1.75	hsa-miR-3194-3p_MIMAT0019218	1	6	1	6	0.06	-5.99	-7.8	-0.702659	AGAGCU&AGCUCU	((((((&))))))	CAAUCUUUAAUCAGUGUGUAACAUUAGGGAGGACUUGAAAGAGCCACCACAUUUUCACCGAGGCCACGCGGAGUACGAUCGAGUGUACAGUGAACAAUGCUAGGGAGAGCUGCCUAUAUGGAAGAGCCCUAAUGUGUAAAAUUAAUUUUAGUAGUGCUAUCCCCAUGUGAUUUUAAUAGCUUCUUAGGAGAAUGACAAAAAAAAAAAAAAAAAAAAAAAAAAAAAAAAA	AGCUCUGCUGCUCACUGGCAGU
NC_045512.2	41	46	41	46	1.23	hsa-miR-522-3p_MIMAT0002868	5	10	5	10	0.35	-5.98	-7.56	-0.701486	GAGCCA&UGGUUC	((((((&))))))	CAAUCUUUAAUCAGUGUGUAACAUUAGGGAGGACUUGAAAGAGCCACCACAUUUUCACCGAGGCCACGCGGAGUACGAUCGAGUGUACAGUGAACAAUGCUAGGGAGAGCUGCCUAUAUGGAAGAGCCCUAAUGUGUAAAAUUAAUUUUAGUAGUGCUAUCCCCAUGUGAUUUUAAUAGCUUCUUAGGAGAAUGACAAAAAAAAAAAAAAAAAAAAAAAAAAAAAAAAA	AAAAUGGUUCCCUUUAGAGUGU
NC_045512.2	164	186	164	169	5.81	hsa-miR-6770-5p_MIMAT0027440	1	23	18	23	2.53	-5.98	-14.32	-0.694398	CAUGUGAUUUUAAUAGCUUCUUA&UGAGAAGGCACAGCUUGCACGUG	((((((..........(((((((&)))))))..........))))))	CAAUCUUUAAUCAGUGUGUAACAUUAGGGAGGACUUGAAAGAGCCACCACAUUUUCACCGAGGCCACGCGGAGUACGAUCGAGUGUACAGUGAACAAUGCUAGGGAGAGCUGCCUAUAUGGAAGAGCCCUAAUGUGUAAAAUUAAUUUUAGUAGUGCUAUCCCCAUGUGAUUUUAAUAGCUUCUUAGGAGAAUGACAAAAAAAAAAAAAAAAAAAAAAAAAAAAAAAAA	UGAGAAGGCACAGCUUGCACGUGA
NC_045512.2	120	129	123	128	3.42	hsa-miR-548as-5p_MIMAT0022267	13	22	14	19	1.36	-5.97	-10.75	-0.700313	GGAAGAGCCC&GGGUUUUGCC	((.(((((((&))))))).))	CAAUCUUUAAUCAGUGUGUAACAUUAGGGAGGACUUGAAAGAGCCACCACAUUUUCACCGAGGCCACGCGGAGUACGAUCGAGUGUACAGUGAACAAUGCUAGGGAGAGCUGCCUAUAUGGAAGAGCCCUAAUGUGUAAAAUUAAUUUUAGUAGUGCUAUCCCCAUGUGAUUUUAAUAGCUUCUUAGGAGAAUGACAAAAAAAAAAAAAAAAAAAAAAAAAAAAAAAAA	AAAAGUAAUUGCGGGUUUUGCC
NC_045512.2	125	130	125	130	2.41	hsa-miR-27a-5p_MIMAT0004501	1	6	1	6	2.08	-5.96	-10.45	-0.69914	AGCCCU&AGGGCU	((((((&))))))	CAAUCUUUAAUCAGUGUGUAACAUUAGGGAGGACUUGAAAGAGCCACCACAUUUUCACCGAGGCCACGCGGAGUACGAUCGAGUGUACAGUGAACAAUGCUAGGGAGAGCUGCCUAUAUGGAAGAGCCCUAAUGUGUAAAAUUAAUUUUAGUAGUGCUAUCCCCAUGUGAUUUUAAUAGCUUCUUAGGAGAAUGACAAAAAAAAAAAAAAAAAAAAAAAAAAAAAAAAA	AGGGCUUAGCUGCUUGUGAGCA
NC_045512.2	104	112	107	112	4.07	hsa-miR-146a-3p_MIMAT0004608	12	20	12	17	2.24	-5.95	-12.26	-0.697966	GGAGAGCUG&CAGUUCUUC	(((((((((&)))))))))	CAAUCUUUAAUCAGUGUGUAACAUUAGGGAGGACUUGAAAGAGCCACCACAUUUUCACCGAGGCCACGCGGAGUACGAUCGAGUGUACAGUGAACAAUGCUAGGGAGAGCUGCCUAUAUGGAAGAGCCCUAAUGUGUAAAAUUAAUUUUAGUAGUGCUAUCCCCAUGUGAUUUUAAUAGCUUCUUAGGAGAAUGACAAAAAAAAAAAAAAAAAAAAAAAAAAAAAAAAA	CCUCUGAAAUUCAGUUCUUCAG
NC_045512.2	13	28	20	25	4.18	hsa-miR-199a-5p_MIMAT0000231	1	15	4	9	2.15	-5.95	-12.28	-0.694346	AGUGUGUAACAUUAGG&CCCAGUGUUCAGACU	(((.((.((((((.((&)).)))))))).)))	CAAUCUUUAAUCAGUGUGUAACAUUAGGGAGGACUUGAAAGAGCCACCACAUUUUCACCGAGGCCACGCGGAGUACGAUCGAGUGUACAGUGAACAAUGCUAGGGAGAGCUGCCUAUAUGGAAGAGCCCUAAUGUGUAAAAUUAAUUUUAGUAGUGCUAUCCCCAUGUGAUUUUAAUAGCUUCUUAGGAGAAUGACAAAAAAAAAAAAAAAAAAAAAAAAAAAAAAAAA	CCCAGUGUUCAGACUACCUGUUC
NC_045512.2	38	45	38	43	1.59	hsa-miR-3144-3p_MIMAT0015015	13	21	16	21	1.39	-5.94	-8.92	-0.696793	AAAGAGCC&GGUCUCUUU	((((((((&)).))))))	CAAUCUUUAAUCAGUGUGUAACAUUAGGGAGGACUUGAAAGAGCCACCACAUUUUCACCGAGGCCACGCGGAGUACGAUCGAGUGUACAGUGAACAAUGCUAGGGAGAGCUGCCUAUAUGGAAGAGCCCUAAUGUGUAAAAUUAAUUUUAGUAGUGCUAUCCCCAUGUGAUUUUAAUAGCUUCUUAGGAGAAUGACAAAAAAAAAAAAAAAAAAAAAAAAAAAAAAAAA	AUAUACCUGUUCGGUCUCUUUA
NC_045512.2	151	158	153	158	2.37	hsa-miR-3942-3p_MIMAT0019230	12	19	12	17	0.15	-5.94	-8.46	-0.700617	GUAGUGCU&AGUAUUAC	((((((((&))))))))	CAAUCUUUAAUCAGUGUGUAACAUUAGGGAGGACUUGAAAGAGCCACCACAUUUUCACCGAGGCCACGCGGAGUACGAUCGAGUGUACAGUGAACAAUGCUAGGGAGAGCUGCCUAUAUGGAAGAGCCCUAAUGUGUAAAAUUAAUUUUAGUAGUGCUAUCCCCAUGUGAUUUUAAUAGCUUCUUAGGAGAAUGACAAAAAAAAAAAAAAAAAAAAAAAAAAAAAAAAA	UUUCAGAUAACAGUAUUACAU
NC_045512.2	77	105	100	105	8.4	hsa-miR-504-5p_MIMAT0002875	4	22	4	9	2.41	-5.93	-16.74	-0.69562	GAUCGAGUGUACAGUGAACAAUGCUAGGG&CCCUGGUCUGCACUCUAUC	(((.(((((((....((......((((((&))))))))))))))).)))	CAAUCUUUAAUCAGUGUGUAACAUUAGGGAGGACUUGAAAGAGCCACCACAUUUUCACCGAGGCCACGCGGAGUACGAUCGAGUGUACAGUGAACAAUGCUAGGGAGAGCUGCCUAUAUGGAAGAGCCCUAAUGUGUAAAAUUAAUUUUAGUAGUGCUAUCCCCAUGUGAUUUUAAUAGCUUCUUAGGAGAAUGACAAAAAAAAAAAAAAAAAAAAAAAAAAAAAAAAA	AGACCCUGGUCUGCACUCUAUC
NC_045512.2	64	76	71	76	4.16	hsa-miR-137-5p_MIMAT0037310	5	18	5	10	2.52	-5.92	-12.6	-0.690845	CCACGCGGAGUAC&GUAUUCUUGGGUGG	((((...((((((&))))))....))))	CAAUCUUUAAUCAGUGUGUAACAUUAGGGAGGACUUGAAAGAGCCACCACAUUUUCACCGAGGCCACGCGGAGUACGAUCGAGUGUACAGUGAACAAUGCUAGGGAGAGCUGCCUAUAUGGAAGAGCCCUAAUGUGUAAAAUUAAUUUUAGUAGUGCUAUCCCCAUGUGAUUUUAAUAGCUUCUUAGGAGAAUGACAAAAAAAAAAAAAAAAAAAAAAAAAAAAAAAAA	ACGGGUAUUCUUGGGUGGAUAAU
NC_045512.2	58	64	59	64	3.48	hsa-miR-3928-3p_MIMAT0018205	15	21	15	20	2.21	-5.92	-11.61	-0.694447	CCGAGGC&GCUUCGG	(((((((&)))))))	CAAUCUUUAAUCAGUGUGUAACAUUAGGGAGGACUUGAAAGAGCCACCACAUUUUCACCGAGGCCACGCGGAGUACGAUCGAGUGUACAGUGAACAAUGCUAGGGAGAGCUGCCUAUAUGGAAGAGCCCUAAUGUGUAAAAUUAAUUUUAGUAGUGCUAUCCCCAUGUGAUUUUAAUAGCUUCUUAGGAGAAUGACAAAAAAAAAAAAAAAAAAAAAAAAAAAAAAAAA	GGAGGAACCUUGGAGCUUCGGC
NC_045512.2	72	80	75	80	2.32	hsa-miR-374a-3p_MIMAT0004688	8	16	8	13	0.24	-5.92	-8.48	-0.694447	AGUACGAUC&GAUUGUAUU	(((((((((&)))))))))	CAAUCUUUAAUCAGUGUGUAACAUUAGGGAGGACUUGAAAGAGCCACCACAUUUUCACCGAGGCCACGCGGAGUACGAUCGAGUGUACAGUGAACAAUGCUAGGGAGAGCUGCCUAUAUGGAAGAGCCCUAAUGUGUAAAAUUAAUUUUAGUAGUGCUAUCCCCAUGUGAUUUUAAUAGCUUCUUAGGAGAAUGACAAAAAAAAAAAAAAAAAAAAAAAAAAAAAAAAA	CUUAUCAGAUUGUAUUGUAAUU
NC_045512.2	116	128	123	128	4.46	hsa-miR-4802-5p_MIMAT0019981	7	21	7	12	2.98	-5.92	-13.36	-0.694447	AUAUGGAAGAGCC&GGUUCUAGACCAUGU	((((((.((((((&))))))...))))))	CAAUCUUUAAUCAGUGUGUAACAUUAGGGAGGACUUGAAAGAGCCACCACAUUUUCACCGAGGCCACGCGGAGUACGAUCGAGUGUACAGUGAACAAUGCUAGGGAGAGCUGCCUAUAUGGAAGAGCCCUAAUGUGUAAAAUUAAUUUUAGUAGUGCUAUCCCCAUGUGAUUUUAAUAGCUUCUUAGGAGAAUGACAAAAAAAAAAAAAAAAAAAAAAAAAAAAAAAAA	UAUGGAGGUUCUAGACCAUGUU
NC_045512.2	123	129	124	129	3.02	hsa-miR-769-5p_MIMAT0003886	11	17	11	16	1.71	-5.92	-10.65	-0.694447	AGAGCCC&GGGUUCU	(((((((&)))))))	CAAUCUUUAAUCAGUGUGUAACAUUAGGGAGGACUUGAAAGAGCCACCACAUUUUCACCGAGGCCACGCGGAGUACGAUCGAGUGUACAGUGAACAAUGCUAGGGAGAGCUGCCUAUAUGGAAGAGCCCUAAUGUGUAAAAUUAAUUUUAGUAGUGCUAUCCCCAUGUGAUUUUAAUAGCUUCUUAGGAGAAUGACAAAAAAAAAAAAAAAAAAAAAAAAAAAAAAAAA	UGAGACCUCUGGGUUCUGAGCU
NC_045512.2	61	66	61	66	1.78	hsa-miR-410-3p_MIMAT0002171	14	19	14	19	2.14	-5.91	-9.83	-0.697078	AGGCCA&UGGCCU	((((((&))))))	CAAUCUUUAAUCAGUGUGUAACAUUAGGGAGGACUUGAAAGAGCCACCACAUUUUCACCGAGGCCACGCGGAGUACGAUCGAGUGUACAGUGAACAAUGCUAGGGAGAGCUGCCUAUAUGGAAGAGCCCUAAUGUGUAAAAUUAAUUUUAGUAGUGCUAUCCCCAUGUGAUUUUAAUAGCUUCUUAGGAGAAUGACAAAAAAAAAAAAAAAAAAAAAAAAAAAAAAAAA	AAUAUAACACAGAUGGCCUGU
NC_045512.2	160	165	160	165	1.63	hsa-miR-491-5p_MIMAT0002807	3	8	3	8	2.54	-5.91	-10.08	-0.693274	UCCCCA&UGGGGA	((((((&))))))	CAAUCUUUAAUCAGUGUGUAACAUUAGGGAGGACUUGAAAGAGCCACCACAUUUUCACCGAGGCCACGCGGAGUACGAUCGAGUGUACAGUGAACAAUGCUAGGGAGAGCUGCCUAUAUGGAAGAGCCCUAAUGUGUAAAAUUAAUUUUAGUAGUGCUAUCCCCAUGUGAUUUUAAUAGCUUCUUAGGAGAAUGACAAAAAAAAAAAAAAAAAAAAAAAAAAAAAAAAA	AGUGGGGAACCCUUCCAUGAGG
NC_045512.2	102	107	102	107	3.05	hsa-miR-550a-3p_MIMAT0003257	8	13	8	13	0.09	-5.91	-9.05	-0.693274	AGGGAG&CUCCCU	((((((&))))))	CAAUCUUUAAUCAGUGUGUAACAUUAGGGAGGACUUGAAAGAGCCACCACAUUUUCACCGAGGCCACGCGGAGUACGAUCGAGUGUACAGUGAACAAUGCUAGGGAGAGCUGCCUAUAUGGAAGAGCCCUAAUGUGUAAAAUUAAUUUUAGUAGUGCUAUCCCCAUGUGAUUUUAAUAGCUUCUUAGGAGAAUGACAAAAAAAAAAAAAAAAAAAAAAAAAAAAAAAAA	UGUCUUACUCCCUCAGGCACAU
NC_045512.2	61	67	61	66	1.98	hsa-miR-548ay-5p_MIMAT0025452	11	17	12	17	0.18	-5.91	-8.07	-0.697078	AGGCCAC&GUGGUUU	(((((((&)))))))	CAAUCUUUAAUCAGUGUGUAACAUUAGGGAGGACUUGAAAGAGCCACCACAUUUUCACCGAGGCCACGCGGAGUACGAUCGAGUGUACAGUGAACAAUGCUAGGGAGAGCUGCCUAUAUGGAAGAGCCCUAAUGUGUAAAAUUAAUUUUAGUAGUGCUAUCCCCAUGUGAUUUUAAUAGCUUCUUAGGAGAAUGACAAAAAAAAAAAAAAAAAAAAAAAAAAAAAAAAA	AAAAGUAAUUGUGGUUUUUGC
NC_045512.2	61	67	61	66	1.98	hsa-miR-548ae-5p_MIMAT0032115	11	17	12	17	0.2	-5.91	-8.09	-0.701113	AGGCCAC&GUGGUUU	(((((((&)))))))	CAAUCUUUAAUCAGUGUGUAACAUUAGGGAGGACUUGAAAGAGCCACCACAUUUUCACCGAGGCCACGCGGAGUACGAUCGAGUGUACAGUGAACAAUGCUAGGGAGAGCUGCCUAUAUGGAAGAGCCCUAAUGUGUAAAAUUAAUUUUAGUAGUGCUAUCCCCAUGUGAUUUUAAUAGCUUCUUAGGAGAAUGACAAAAAAAAAAAAAAAAAAAAAAAAAAAAAAAAA	AAAAGUAAUUGUGGUUUUUG
NC_045512.2	187	192	187	192	2.54	hsa-miR-576-5p_MIMAT0003241	9	14	9	14	0	-5.91	-8.45	-0.693274	GGAGAA&UUCUCC	((((((&))))))	CAAUCUUUAAUCAGUGUGUAACAUUAGGGAGGACUUGAAAGAGCCACCACAUUUUCACCGAGGCCACGCGGAGUACGAUCGAGUGUACAGUGAACAAUGCUAGGGAGAGCUGCCUAUAUGGAAGAGCCCUAAUGUGUAAAAUUAAUUUUAGUAGUGCUAUCCCCAUGUGAUUUUAAUAGCUUCUUAGGAGAAUGACAAAAAAAAAAAAAAAAAAAAAAAAAAAAAAAAA	AUUCUAAUUUCUCCACGUCUUU
NC_045512.2	126	131	126	131	2.38	hsa-miR-1343-3p_MIMAT0019776	5	10	5	10	2.06	-5.9	-10.34	-0.692101	GCCCUA&UGGGGC	((((((&))))))	CAAUCUUUAAUCAGUGUGUAACAUUAGGGAGGACUUGAAAGAGCCACCACAUUUUCACCGAGGCCACGCGGAGUACGAUCGAGUGUACAGUGAACAAUGCUAGGGAGAGCUGCCUAUAUGGAAGAGCCCUAAUGUGUAAAAUUAAUUUUAGUAGUGCUAUCCCCAUGUGAUUUUAAUAGCUUCUUAGGAGAAUGACAAAAAAAAAAAAAAAAAAAAAAAAAAAAAAAAA	CUCCUGGGGCCCGCACUCUCGC
NC_045512.2	82	93	85	90	3.08	hsa-miR-1910-5p_MIMAT0007884	5	14	7	12	1.06	-5.9	-10.04	-0.695899	AGUGUACAGUGA&UCCUGUGCCU	((.((((((.((&))))))))))	CAAUCUUUAAUCAGUGUGUAACAUUAGGGAGGACUUGAAAGAGCCACCACAUUUUCACCGAGGCCACGCGGAGUACGAUCGAGUGUACAGUGAACAAUGCUAGGGAGAGCUGCCUAUAUGGAAGAGCCCUAAUGUGUAAAAUUAAUUUUAGUAGUGCUAUCCCCAUGUGAUUUUAAUAGCUUCUUAGGAGAAUGACAAAAAAAAAAAAAAAAAAAAAAAAAAAAAAAAA	CCAGUCCUGUGCCUGCCGCCU
NC_045512.2	187	192	187	192	2.54	hsa-miR-197-3p_MIMAT0000227	10	15	10	15	0.01	-5.9	-8.45	-0.692101	GGAGAA&UUCUCC	((((((&))))))	CAAUCUUUAAUCAGUGUGUAACAUUAGGGAGGACUUGAAAGAGCCACCACAUUUUCACCGAGGCCACGCGGAGUACGAUCGAGUGUACAGUGAACAAUGCUAGGGAGAGCUGCCUAUAUGGAAGAGCCCUAAUGUGUAAAAUUAAUUUUAGUAGUGCUAUCCCCAUGUGAUUUUAAUAGCUUCUUAGGAGAAUGACAAAAAAAAAAAAAAAAAAAAAAAAAAAAAAAAA	UUCACCACCUUCUCCACCCAGC
NC_045512.2	104	116	110	115	6.19	hsa-miR-196b-5p_MIMAT0001080	1	12	2	7	2.93	-5.89	-15.01	-0.690928	GGAGAGCUGCCUA&UAGGUAGUUUCC	(((((.(((((((&))))))))))))	CAAUCUUUAAUCAGUGUGUAACAUUAGGGAGGACUUGAAAGAGCCACCACAUUUUCACCGAGGCCACGCGGAGUACGAUCGAGUGUACAGUGAACAAUGCUAGGGAGAGCUGCCUAUAUGGAAGAGCCCUAAUGUGUAAAAUUAAUUUUAGUAGUGCUAUCCCCAUGUGAUUUUAAUAGCUUCUUAGGAGAAUGACAAAAAAAAAAAAAAAAAAAAAAAAAAAAAAAAA	UAGGUAGUUUCCUGUUGUUGGG
NC_045512.2	59	78	59	64	6.61	hsa-miR-642a-5p_MIMAT0003312	2	22	17	22	0.09	-5.89	-12.59	-0.690928	CGAGGCCACGCGGAGUACGA&UCCCUCUCCAAAUGUGUCUUG	((((((((...((((...((&))...))))...)).))))))	CAAUCUUUAAUCAGUGUGUAACAUUAGGGAGGACUUGAAAGAGCCACCACAUUUUCACCGAGGCCACGCGGAGUACGAUCGAGUGUACAGUGAACAAUGCUAGGGAGAGCUGCCUAUAUGGAAGAGCCCUAAUGUGUAAAAUUAAUUUUAGUAGUGCUAUCCCCAUGUGAUUUUAAUAGCUUCUUAGGAGAAUGACAAAAAAAAAAAAAAAAAAAAAAAAAAAAAAAAA	GUCCCUCUCCAAAUGUGUCUUG
NC_045512.2	27	32	27	32	3.52	hsa-miR-1249-3p_MIMAT0005901	6	11	6	11	0	-5.87	-9.39	-0.688582	GGGAGG&CUUCCC	((((((&))))))	CAAUCUUUAAUCAGUGUGUAACAUUAGGGAGGACUUGAAAGAGCCACCACAUUUUCACCGAGGCCACGCGGAGUACGAUCGAGUGUACAGUGAACAAUGCUAGGGAGAGCUGCCUAUAUGGAAGAGCCCUAAUGUGUAAAAUUAAUUUUAGUAGUGCUAUCCCCAUGUGAUUUUAAUAGCUUCUUAGGAGAAUGACAAAAAAAAAAAAAAAAAAAAAAAAAAAAAAAAA	ACGCCCUUCCCCCCCUUCUUCA
NC_045512.2	60	65	60	65	2.45	hsa-miR-3144-3p_MIMAT0015015	13	18	13	18	1.39	-5.87	-9.71	-0.688582	GAGGCC&GGUCUC	((((((&))))))	CAAUCUUUAAUCAGUGUGUAACAUUAGGGAGGACUUGAAAGAGCCACCACAUUUUCACCGAGGCCACGCGGAGUACGAUCGAGUGUACAGUGAACAAUGCUAGGGAGAGCUGCCUAUAUGGAAGAGCCCUAAUGUGUAAAAUUAAUUUUAGUAGUGCUAUCCCCAUGUGAUUUUAAUAGCUUCUUAGGAGAAUGACAAAAAAAAAAAAAAAAAAAAAAAAAAAAAAAAA	AUAUACCUGUUCGGUCUCUUUA
NC_045512.2	126	131	126	131	2.38	hsa-miR-324-5p_MIMAT0000761	10	15	10	15	2.47	-5.86	-10.71	-0.687409	GCCCUA&UAGGGC	((((((&))))))	CAAUCUUUAAUCAGUGUGUAACAUUAGGGAGGACUUGAAAGAGCCACCACAUUUUCACCGAGGCCACGCGGAGUACGAUCGAGUGUACAGUGAACAAUGCUAGGGAGAGCUGCCUAUAUGGAAGAGCCCUAAUGUGUAAAAUUAAUUUUAGUAGUGCUAUCCCCAUGUGAUUUUAAUAGCUUCUUAGGAGAAUGACAAAAAAAAAAAAAAAAAAAAAAAAAAAAAAAAA	CGCAUCCCCUAGGGCAUUGGUG
NC_045512.2	26	36	26	31	4.07	hsa-miR-520c-3p_MIMAT0002846	2	12	7	12	3.14	-5.86	-13.07	-0.687409	AGGGAGGACUU&AAGUGCUUCCU	((((((.((((&)))).))))))	CAAUCUUUAAUCAGUGUGUAACAUUAGGGAGGACUUGAAAGAGCCACCACAUUUUCACCGAGGCCACGCGGAGUACGAUCGAGUGUACAGUGAACAAUGCUAGGGAGAGCUGCCUAUAUGGAAGAGCCCUAAUGUGUAAAAUUAAUUUUAGUAGUGCUAUCCCCAUGUGAUUUUAAUAGCUUCUUAGGAGAAUGACAAAAAAAAAAAAAAAAAAAAAAAAAAAAAAAAA	AAAGUGCUUCCUUUUAGAGGGU
NC_045512.2	13	18	13	18	1.65	hsa-miR-122-3p_MIMAT0004590	12	17	12	17	0.01	-5.84	-7.5	-0.685063	AGUGUG&CACACU	((((((&))))))	CAAUCUUUAAUCAGUGUGUAACAUUAGGGAGGACUUGAAAGAGCCACCACAUUUUCACCGAGGCCACGCGGAGUACGAUCGAGUGUACAGUGAACAAUGCUAGGGAGAGCUGCCUAUAUGGAAGAGCCCUAAUGUGUAAAAUUAAUUUUAGUAGUGCUAUCCCCAUGUGAUUUUAAUAGCUUCUUAGGAGAAUGACAAAAAAAAAAAAAAAAAAAAAAAAAAAAAAAAA	AACGCCAUUAUCACACUAAAUA
NC_045512.2	67	89	83	88	6.9	hsa-miR-3177-5p_MIMAT0019215	3	21	4	9	4.86	-5.84	-17.6	-0.681509	CGCGGAGUACGAUCGAGUGUACA&UGUACACACGUGCCAGGCG	(((...(((((.....(((((((&))))))).)))))...)))	CAAUCUUUAAUCAGUGUGUAACAUUAGGGAGGACUUGAAAGAGCCACCACAUUUUCACCGAGGCCACGCGGAGUACGAUCGAGUGUACAGUGAACAAUGCUAGGGAGAGCUGCCUAUAUGGAAGAGCCCUAAUGUGUAAAAUUAAUUUUAGUAGUGCUAUCCCCAUGUGAUUUUAAUAGCUUCUUAGGAGAAUGACAAAAAAAAAAAAAAAAAAAAAAAAAAAAAAAAA	UGUGUACACACGUGCCAGGCGCU
NC_045512.2	53	62	53	58	3.67	hsa-miR-501-5p_MIMAT0002872	13	22	17	22	2.69	-5.84	-12.2	-0.685063	UUUCACCGAG&CUGGGUGAGA	(((((((.((&)).)))))))	CAAUCUUUAAUCAGUGUGUAACAUUAGGGAGGACUUGAAAGAGCCACCACAUUUUCACCGAGGCCACGCGGAGUACGAUCGAGUGUACAGUGAACAAUGCUAGGGAGAGCUGCCUAUAUGGAAGAGCCCUAAUGUGUAAAAUUAAUUUUAGUAGUGCUAUCCCCAUGUGAUUUUAAUAGCUUCUUAGGAGAAUGACAAAAAAAAAAAAAAAAAAAAAAAAAAAAAAAAA	AAUCCUUUGUCCCUGGGUGAGA
NC_045512.2	116	128	116	121	4.46	hsa-miR-494-5p_MIMAT0026607	2	13	8	13	0.97	-5.83	-11.26	-0.680342	AUAUGGAAGAGCC&GGUUGUCCGUGU	(((((((..((((&)))).)))))))	CAAUCUUUAAUCAGUGUGUAACAUUAGGGAGGACUUGAAAGAGCCACCACAUUUUCACCGAGGCCACGCGGAGUACGAUCGAGUGUACAGUGAACAAUGCUAGGGAGAGCUGCCUAUAUGGAAGAGCCCUAAUGUGUAAAAUUAAUUUUAGUAGUGCUAUCCCCAUGUGAUUUUAAUAGCUUCUUAGGAGAAUGACAAAAAAAAAAAAAAAAAAAAAAAAAAAAAAAAA	AGGUUGUCCGUGUUGUCUUCUCU
NC_045512.2	60	80	69	74	6.29	hsa-miR-7161-3p_MIMAT0028233	3	24	11	16	4.5	-5.83	-16.62	-0.665075	GAGGCCACGCGGAGUACGAUC&GAUCUUUGACUCUGGCAGUCUC	(((((....((((((..((((&))))....))))))...)))))	CAAUCUUUAAUCAGUGUGUAACAUUAGGGAGGACUUGAAAGAGCCACCACAUUUUCACCGAGGCCACGCGGAGUACGAUCGAGUGUACAGUGAACAAUGCUAGGGAGAGCUGCCUAUAUGGAAGAGCCCUAAUGUGUAAAAUUAAUUUUAGUAGUGCUAUCCCCAUGUGAUUUUAAUAGCUUCUUAGGAGAAUGACAAAAAAAAAAAAAAAAAAAAAAAAAAAAAAAAA	UAGAUCUUUGACUCUGGCAGUCUCCAGG
NC_045512.2	182	191	183	188	4.14	hsa-miR-125a-5p_MIMAT0000443	1	9	3	8	0.17	-5.81	-10.12	-0.674658	UCUUAGGAGA&UCCCUGAGA	(((((((.((&)))))))))	CAAUCUUUAAUCAGUGUGUAACAUUAGGGAGGACUUGAAAGAGCCACCACAUUUUCACCGAGGCCACGCGGAGUACGAUCGAGUGUACAGUGAACAAUGCUAGGGAGAGCUGCCUAUAUGGAAGAGCCCUAAUGUGUAAAAUUAAUUUUAGUAGUGCUAUCCCCAUGUGAUUUUAAUAGCUUCUUAGGAGAAUGACAAAAAAAAAAAAAAAAAAAAAAAAAAAAAAAAA	UCCCUGAGACCCUUUAACCUGUGA
NC_045512.2	68	85	80	85	5.76	hsa-miR-3614-5p_MIMAT0017992	2	21	2	7	1.28	-5.79	-12.83	-0.675674	GCGGAGUACGAUCGAGUG&CACUUGGAUCUGAAGGCUGC	((((.....(((((((((&)))))).)))......))))	CAAUCUUUAAUCAGUGUGUAACAUUAGGGAGGACUUGAAAGAGCCACCACAUUUUCACCGAGGCCACGCGGAGUACGAUCGAGUGUACAGUGAACAAUGCUAGGGAGAGCUGCCUAUAUGGAAGAGCCCUAAUGUGUAAAAUUAAUUUUAGUAGUGCUAUCCCCAUGUGAUUUUAAUAGCUUCUUAGGAGAAUGACAAAAAAAAAAAAAAAAAAAAAAAAAAAAAAAAA	CCACUUGGAUCUGAAGGCUGCCC
NC_045512.2	107	112	107	112	1.75	hsa-miR-375-3p_MIMAT0000728	11	16	11	16	0.56	-5.78	-8.09	-0.678025	GAGCUG&CGGCUC	((((((&))))))	CAAUCUUUAAUCAGUGUGUAACAUUAGGGAGGACUUGAAAGAGCCACCACAUUUUCACCGAGGCCACGCGGAGUACGAUCGAGUGUACAGUGAACAAUGCUAGGGAGAGCUGCCUAUAUGGAAGAGCCCUAAUGUGUAAAAUUAAUUUUAGUAGUGCUAUCCCCAUGUGAUUUUAAUAGCUUCUUAGGAGAAUGACAAAAAAAAAAAAAAAAAAAAAAAAAAAAAAAAA	UUUGUUCGUUCGGCUCGCGUGA
NC_045512.2	122	138	133	138	3.69	hsa-miR-1185-1-3p_MIMAT0022838	2	20	2	7	3.87	-5.77	-13.33	-0.676852	AAGAGCCCUAAUGUGUA&UAUACAGGGGGAGACUCUU	((((((((...((((((&))))))..)))...)))))	CAAUCUUUAAUCAGUGUGUAACAUUAGGGAGGACUUGAAAGAGCCACCACAUUUUCACCGAGGCCACGCGGAGUACGAUCGAGUGUACAGUGAACAAUGCUAGGGAGAGCUGCCUAUAUGGAAGAGCCCUAAUGUGUAAAAUUAAUUUUAGUAGUGCUAUCCCCAUGUGAUUUUAAUAGCUUCUUAGGAGAAUGACAAAAAAAAAAAAAAAAAAAAAAAAAAAAAAAAA	AUAUACAGGGGGAGACUCUUAU
NC_045512.2	81	86	81	86	2.72	hsa-miR-3145-5p_MIMAT0019205	9	14	9	14	0	-5.77	-8.49	-0.676852	GAGUGU&ACACUC	((((((&))))))	CAAUCUUUAAUCAGUGUGUAACAUUAGGGAGGACUUGAAAGAGCCACCACAUUUUCACCGAGGCCACGCGGAGUACGAUCGAGUGUACAGUGAACAAUGCUAGGGAGAGCUGCCUAUAUGGAAGAGCCCUAAUGUGUAAAAUUAAUUUUAGUAGUGCUAUCCCCAUGUGAUUUUAAUAGCUUCUUAGGAGAAUGACAAAAAAAAAAAAAAAAAAAAAAAAAAAAAAAAA	AACUCCAAACACUCAAAACUCA
NC_045512.2	151	164	151	156	3.1	hsa-miR-503-3p_MIMAT0022925	1	19	14	19	3.81	-5.77	-12.68	-0.67334	GUAGUGCUAUCCCC&GGGGUAUUGUUUCCGCUGC	((((((..((((((&)))).))......))))))	CAAUCUUUAAUCAGUGUGUAACAUUAGGGAGGACUUGAAAGAGCCACCACAUUUUCACCGAGGCCACGCGGAGUACGAUCGAGUGUACAGUGAACAAUGCUAGGGAGAGCUGCCUAUAUGGAAGAGCCCUAAUGUGUAAAAUUAAUUUUAGUAGUGCUAUCCCCAUGUGAUUUUAAUAGCUUCUUAGGAGAAUGACAAAAAAAAAAAAAAAAAAAAAAAAAAAAAAAAA	GGGGUAUUGUUUCCGCUGCCAGG
NC_045512.2	160	165	160	165	1.63	hsa-miR-2110_MIMAT0010133	2	7	2	7	2.79	-5.75	-10.17	-0.674505	UCCCCA&UGGGGA	((((((&))))))	CAAUCUUUAAUCAGUGUGUAACAUUAGGGAGGACUUGAAAGAGCCACCACAUUUUCACCGAGGCCACGCGGAGUACGAUCGAGUGUACAGUGAACAAUGCUAGGGAGAGCUGCCUAUAUGGAAGAGCCCUAAUGUGUAAAAUUAAUUUUAGUAGUGCUAUCCCCAUGUGAUUUUAAUAGCUUCUUAGGAGAAUGACAAAAAAAAAAAAAAAAAAAAAAAAAAAAAAAAA	UUGGGGAAACGGCCGCUGAGUG
NC_045512.2	151	172	151	156	4.81	hsa-miR-34b-3p_MIMAT0004676	2	19	14	19	0.02	-5.75	-10.58	-0.674505	GUAGUGCUAUCCCCAUGUGAUU&AAUCACUAACUCCACUGC	((((((..........((((((&))))))......))))))	CAAUCUUUAAUCAGUGUGUAACAUUAGGGAGGACUUGAAAGAGCCACCACAUUUUCACCGAGGCCACGCGGAGUACGAUCGAGUGUACAGUGAACAAUGCUAGGGAGAGCUGCCUAUAUGGAAGAGCCCUAAUGUGUAAAAUUAAUUUUAGUAGUGCUAUCCCCAUGUGAUUUUAAUAGCUUCUUAGGAGAAUGACAAAAAAAAAAAAAAAAAAAAAAAAAAAAAAAAA	CAAUCACUAACUCCACUGCCAU
NC_045512.2	89	104	99	104	4.46	hsa-miR-374b-3p_MIMAT0004956	1	22	1	6	0.59	-5.75	-10.8	-0.674505	AGUGAACAAUGCUAGG&CUUAGCAGGUUGUAUUAUCAUU	((((((((((((((((&)))))))..))))....)))))	CAAUCUUUAAUCAGUGUGUAACAUUAGGGAGGACUUGAAAGAGCCACCACAUUUUCACCGAGGCCACGCGGAGUACGAUCGAGUGUACAGUGAACAAUGCUAGGGAGAGCUGCCUAUAUGGAAGAGCCCUAAUGUGUAAAAUUAAUUUUAGUAGUGCUAUCCCCAUGUGAUUUUAAUAGCUUCUUAGGAGAAUGACAAAAAAAAAAAAAAAAAAAAAAAAAAAAAAAAA	CUUAGCAGGUUGUAUUAUCAUU
NC_045512.2	184	190	184	189	3.38	hsa-miR-335-3p_MIMAT0004703	14	20	15	20	0.1	-5.74	-9.22	-0.673332	UUAGGAG&CUCCUGA	(((((((&)))))))	CAAUCUUUAAUCAGUGUGUAACAUUAGGGAGGACUUGAAAGAGCCACCACAUUUUCACCGAGGCCACGCGGAGUACGAUCGAGUGUACAGUGAACAAUGCUAGGGAGAGCUGCCUAUAUGGAAGAGCCCUAAUGUGUAAAAUUAAUUUUAGUAGUGCUAUCCCCAUGUGAUUUUAAUAGCUUCUUAGGAGAAUGACAAAAAAAAAAAAAAAAAAAAAAAAAAAAAAAAA	UUUUUCAUUAUUGCUCCUGACC
NC_045512.2	110	115	110	115	2.5	hsa-miR-3619-5p_MIMAT0017999	6	11	6	11	0.17	-5.73	-8.4	-0.672159	CUGCCU&AGGCAG	((((((&))))))	CAAUCUUUAAUCAGUGUGUAACAUUAGGGAGGACUUGAAAGAGCCACCACAUUUUCACCGAGGCCACGCGGAGUACGAUCGAGUGUACAGUGAACAAUGCUAGGGAGAGCUGCCUAUAUGGAAGAGCCCUAAUGUGUAAAAUUAAUUUUAGUAGUGCUAUCCCCAUGUGAUUUUAAUAGCUUCUUAGGAGAAUGACAAAAAAAAAAAAAAAAAAAAAAAAAAAAAAAAA	UCAGCAGGCAGGCUGGUGCAGC
NC_045512.2	187	195	187	192	2.86	hsa-miR-877-3p_MIMAT0004950	4	11	6	11	0	-5.73	-8.59	-0.675847	GGAGAAUGA&UCUUCUCC	((((((.((&))))))))	CAAUCUUUAAUCAGUGUGUAACAUUAGGGAGGACUUGAAAGAGCCACCACAUUUUCACCGAGGCCACGCGGAGUACGAUCGAGUGUACAGUGAACAAUGCUAGGGAGAGCUGCCUAUAUGGAAGAGCCCUAAUGUGUAAAAUUAAUUUUAGUAGUGCUAUCCCCAUGUGAUUUUAAUAGCUUCUUAGGAGAAUGACAAAAAAAAAAAAAAAAAAAAAAAAAAAAAAAAA	UCCUCUUCUCCCUCCUCCCAG
NC_045512.2	26	32	27	32	3.54	hsa-miR-518a-3p_MIMAT0002863	8	14	8	13	0.3	-5.72	-9.56	-0.670986	AGGGAGG&CUUCCCU	(((((((&)))))))	CAAUCUUUAAUCAGUGUGUAACAUUAGGGAGGACUUGAAAGAGCCACCACAUUUUCACCGAGGCCACGCGGAGUACGAUCGAGUGUACAGUGAACAAUGCUAGGGAGAGCUGCCUAUAUGGAAGAGCCCUAAUGUGUAAAAUUAAUUUUAGUAGUGCUAUCCCCAUGUGAUUUUAAUAGCUUCUUAGGAGAAUGACAAAAAAAAAAAAAAAAAAAAAAAAAAAAAAAAA	GAAAGCGCUUCCCUUUGCUGGA
NC_045512.2	44	49	44	49	1.1	hsa-miR-6741-5p_MIMAT0027383	9	14	9	14	2.2	-5.72	-9.02	-0.670986	CCACCA&UGGUGG	((((((&))))))	CAAUCUUUAAUCAGUGUGUAACAUUAGGGAGGACUUGAAAGAGCCACCACAUUUUCACCGAGGCCACGCGGAGUACGAUCGAGUGUACAGUGAACAAUGCUAGGGAGAGCUGCCUAUAUGGAAGAGCCCUAAUGUGUAAAAUUAAUUUUAGUAGUGCUAUCCCCAUGUGAUUUUAAUAGCUUCUUAGGAGAAUGACAAAAAAAAAAAAAAAAAAAAAAAAAAAAAAAAA	GUGGGUGCUGGUGGGAGCCGUG
NC_045512.2	178	196	185	190	5.11	hsa-let-7a-2-3p_MIMAT0010195	3	18	10	15	1.42	-5.71	-12.24	-0.669813	AGCUUCUUAGGAGAAUGAC&GUACAGCCUCCUAGCU	(((....((((((..((((&)).))..)))))))))	CAAUCUUUAAUCAGUGUGUAACAUUAGGGAGGACUUGAAAGAGCCACCACAUUUUCACCGAGGCCACGCGGAGUACGAUCGAGUGUACAGUGAACAAUGCUAGGGAGAGCUGCCUAUAUGGAAGAGCCCUAAUGUGUAAAAUUAAUUUUAGUAGUGCUAUCCCCAUGUGAUUUUAAUAGCUUCUUAGGAGAAUGACAAAAAAAAAAAAAAAAAAAAAAAAAAAAAAAAA	CUGUACAGCCUCCUAGCUUUCC
NC_045512.2	12	19	12	17	1.71	hsa-miR-144-5p_MIMAT0004600	11	18	13	18	0.25	-5.7	-7.66	-0.66864	CAGUGUGU&AUAUACUG	((((((((&))))))))	CAAUCUUUAAUCAGUGUGUAACAUUAGGGAGGACUUGAAAGAGCCACCACAUUUUCACCGAGGCCACGCGGAGUACGAUCGAGUGUACAGUGAACAAUGCUAGGGAGAGCUGCCUAUAUGGAAGAGCCCUAAUGUGUAAAAUUAAUUUUAGUAGUGCUAUCCCCAUGUGAUUUUAAUAGCUUCUUAGGAGAAUGACAAAAAAAAAAAAAAAAAAAAAAAAAAAAAAAAA	GGAUAUCAUCAUAUACUGUAAG
NC_045512.2	28	39	33	38	4.02	hsa-miR-26b-5p_MIMAT0000083	1	12	2	7	0.15	-5.68	-9.85	-0.66995	GGAGGACUUGAA&UUCAAGUAAUUC	(((..(((((((&)))))))..)))	CAAUCUUUAAUCAGUGUGUAACAUUAGGGAGGACUUGAAAGAGCCACCACAUUUUCACCGAGGCCACGCGGAGUACGAUCGAGUGUACAGUGAACAAUGCUAGGGAGAGCUGCCUAUAUGGAAGAGCCCUAAUGUGUAAAAUUAAUUUUAGUAGUGCUAUCCCCAUGUGAUUUUAAUAGCUUCUUAGGAGAAUGACAAAAAAAAAAAAAAAAAAAAAAAAAAAAAAAAA	UUCAAGUAAUUCAGGAUAGGU
NC_045512.2	77	83	78	83	1.23	hsa-miR-423-3p_MIMAT0001340	3	9	3	8	2.27	-5.68	-9.18	-0.662838	GAUCGAG&CUCGGUC	(((((((&)))))))	CAAUCUUUAAUCAGUGUGUAACAUUAGGGAGGACUUGAAAGAGCCACCACAUUUUCACCGAGGCCACGCGGAGUACGAUCGAGUGUACAGUGAACAAUGCUAGGGAGAGCUGCCUAUAUGGAAGAGCCCUAAUGUGUAAAAUUAAUUUUAGUAGUGCUAUCCCCAUGUGAUUUUAAUAGCUUCUUAGGAGAAUGACAAAAAAAAAAAAAAAAAAAAAAAAAAAAAAAAA	AGCUCGGUCUGAGGCCCCUCAGU
NC_045512.2	186	191	186	191	2.54	hsa-miR-483-3p_MIMAT0002173	8	13	8	13	0	-5.68	-8.22	-0.66995	AGGAGA&UCUCCU	((((((&))))))	CAAUCUUUAAUCAGUGUGUAACAUUAGGGAGGACUUGAAAGAGCCACCACAUUUUCACCGAGGCCACGCGGAGUACGAUCGAGUGUACAGUGAACAAUGCUAGGGAGAGCUGCCUAUAUGGAAGAGCCCUAAUGUGUAAAAUUAAUUUUAGUAGUGCUAUCCCCAUGUGAUUUUAAUAGCUUCUUAGGAGAAUGACAAAAAAAAAAAAAAAAAAAAAAAAAAAAAAAAA	UCACUCCUCUCCUCCCGUCUU
NC_045512.2	67	76	67	72	4	hsa-miR-342-5p_MIMAT0004694	5	16	11	16	1	-5.67	-10.67	-0.668771	CGCGGAGUAC&GUGCUAUCUGUG	((((((((((&))))..))))))	CAAUCUUUAAUCAGUGUGUAACAUUAGGGAGGACUUGAAAGAGCCACCACAUUUUCACCGAGGCCACGCGGAGUACGAUCGAGUGUACAGUGAACAAUGCUAGGGAGAGCUGCCUAUAUGGAAGAGCCCUAAUGUGUAAAAUUAAUUUUAGUAGUGCUAUCCCCAUGUGAUUUUAAUAGCUUCUUAGGAGAAUGACAAAAAAAAAAAAAAAAAAAAAAAAAAAAAAAAA	AGGGGUGCUAUCUGUGAUUGA
NC_045512.2	128	137	128	133	2.45	hsa-miR-190a-5p_MIMAT0000458	12	21	16	21	2.83	-5.65	-10.93	-0.662775	CCUAAUGUGU&AUAUAUUAGG	((((((((((&))))))))))	CAAUCUUUAAUCAGUGUGUAACAUUAGGGAGGACUUGAAAGAGCCACCACAUUUUCACCGAGGCCACGCGGAGUACGAUCGAGUGUACAGUGAACAAUGCUAGGGAGAGCUGCCUAUAUGGAAGAGCCCUAAUGUGUAAAAUUAAUUUUAGUAGUGCUAUCCCCAUGUGAUUUUAAUAGCUUCUUAGGAGAAUGACAAAAAAAAAAAAAAAAAAAAAAAAAAAAAAAAA	UGAUAUGUUUGAUAUAUUAGGU
NC_045512.2	114	127	116	121	4.44	hsa-miR-194-5p_MIMAT0000460	8	21	14	19	1.99	-5.65	-12.08	-0.662775	CUAUAUGGAAGAGC&GCAACUCCAUGUGG	(((((((((...((&))...)))))))))	CAAUCUUUAAUCAGUGUGUAACAUUAGGGAGGACUUGAAAGAGCCACCACAUUUUCACCGAGGCCACGCGGAGUACGAUCGAGUGUACAGUGAACAAUGCUAGGGAGAGCUGCCUAUAUGGAAGAGCCCUAAUGUGUAAAAUUAAUUUUAGUAGUGCUAUCCCCAUGUGAUUUUAAUAGCUUCUUAGGAGAAUGACAAAAAAAAAAAAAAAAAAAAAAAAAAAAAAAAA	UGUAACAGCAACUCCAUGUGGA
NC_045512.2	122	130	123	128	3.26	hsa-miR-203a-5p_MIMAT0031890	1	10	4	9	0.84	-5.65	-9.75	-0.652983	AAGAGCCCU&AGUGGUUCUU	(((((((((&)).)))))))	CAAUCUUUAAUCAGUGUGUAACAUUAGGGAGGACUUGAAAGAGCCACCACAUUUUCACCGAGGCCACGCGGAGUACGAUCGAGUGUACAGUGAACAAUGCUAGGGAGAGCUGCCUAUAUGGAAGAGCCCUAAUGUGUAAAAUUAAUUUUAGUAGUGCUAUCCCCAUGUGAUUUUAAUAGCUUCUUAGGAGAAUGACAAAAAAAAAAAAAAAAAAAAAAAAAAAAAAAAA	AGUGGUUCUUAACAGUUCAACAGUU
NC_045512.2	90	105	100	105	5.06	hsa-miR-6720-5p_MIMAT0027345	7	22	7	12	4.26	-5.65	-14.97	-0.659337	GUGAACAAUGCUAGGG&CCCUGGUAGGCGCCGC	(((.....((((((((&)))))))).....)))	CAAUCUUUAAUCAGUGUGUAACAUUAGGGAGGACUUGAAAGAGCCACCACAUUUUCACCGAGGCCACGCGGAGUACGAUCGAGUGUACAGUGAACAAUGCUAGGGAGAGCUGCCUAUAUGGAAGAGCCCUAAUGUGUAAAAUUAAUUUUAGUAGUGCUAUCCCCAUGUGAUUUUAAUAGCUUCUUAGGAGAAUGACAAAAAAAAAAAAAAAAAAAAAAAAAAAAAAAAA	UUCCAGCCCUGGUAGGCGCCGCG
NC_045512.2	191	197	191	196	0.57	hsa-miR-513c-5p_MIMAT0005789	13	19	14	19	0.22	-5.64	-6.43	-0.661602	AAUGACA&UGUCGUU	(((((((&)))))))	CAAUCUUUAAUCAGUGUGUAACAUUAGGGAGGACUUGAAAGAGCCACCACAUUUUCACCGAGGCCACGCGGAGUACGAUCGAGUGUACAGUGAACAAUGCUAGGGAGAGCUGCCUAUAUGGAAGAGCCCUAAUGUGUAAAAUUAAUUUUAGUAGUGCUAUCCCCAUGUGAUUUUAAUAGCUUCUUAGGAGAAUGACAAAAAAAAAAAAAAAAAAAAAAAAAAAAAAAAA	UUCUCAAGGAGGUGUCGUUUAU
NC_045512.2	14	19	14	19	1.54	hsa-miR-874-5p_MIMAT0026718	8	13	8	13	0.01	-5.64	-7.19	-0.65817	GUGUGU&ACGCAC	((((((&))))))	CAAUCUUUAAUCAGUGUGUAACAUUAGGGAGGACUUGAAAGAGCCACCACAUUUUCACCGAGGCCACGCGGAGUACGAUCGAGUGUACAGUGAACAAUGCUAGGGAGAGCUGCCUAUAUGGAAGAGCCCUAAUGUGUAAAAUUAAUUUUAGUAGUGCUAUCCCCAUGUGAUUUUAAUAGCUUCUUAGGAGAAUGACAAAAAAAAAAAAAAAAAAAAAAAAAAAAAAAAA	CGGCCCCACGCACCAGGGUAAGA
NC_045512.2	45	53	48	53	2.48	hsa-miR-32-3p_MIMAT0004505	7	16	7	12	0.76	-5.63	-8.87	-0.660429	CACCACAUU&AGUGUGUGUG	(((((((((&)))))).)))	CAAUCUUUAAUCAGUGUGUAACAUUAGGGAGGACUUGAAAGAGCCACCACAUUUUCACCGAGGCCACGCGGAGUACGAUCGAGUGUACAGUGAACAAUGCUAGGGAGAGCUGCCUAUAUGGAAGAGCCCUAAUGUGUAAAAUUAAUUUUAGUAGUGCUAUCCCCAUGUGAUUUUAAUAGCUUCUUAGGAGAAUGACAAAAAAAAAAAAAAAAAAAAAAAAAAAAAAAAA	CAAUUUAGUGUGUGUGAUAUUU
NC_045512.2	67	78	73	78	4.05	hsa-miR-126-3p_MIMAT0000445	1	10	1	6	0.99	-5.62	-10.66	-0.659256	CGCGGAGUACGA&UCGUACCGUG	((((..((((((&))))))))))	CAAUCUUUAAUCAGUGUGUAACAUUAGGGAGGACUUGAAAGAGCCACCACAUUUUCACCGAGGCCACGCGGAGUACGAUCGAGUGUACAGUGAACAAUGCUAGGGAGAGCUGCCUAUAUGGAAGAGCCCUAAUGUGUAAAAUUAAUUUUAGUAGUGCUAUCCCCAUGUGAUUUUAAUAGCUUCUUAGGAGAAUGACAAAAAAAAAAAAAAAAAAAAAAAAAAAAAAAAA	UCGUACCGUGAGUAAUAAUGCG
NC_045512.2	194	201	194	199	0.61	hsa-miR-548h-5p_MIMAT0005928	15	22	17	22	0.25	-5.62	-6.48	-0.659256	GACAAAAA&UUUUUGUC	((((((((&))))))))	CAAUCUUUAAUCAGUGUGUAACAUUAGGGAGGACUUGAAAGAGCCACCACAUUUUCACCGAGGCCACGCGGAGUACGAUCGAGUGUACAGUGAACAAUGCUAGGGAGAGCUGCCUAUAUGGAAGAGCCCUAAUGUGUAAAAUUAAUUUUAGUAGUGCUAUCCCCAUGUGAUUUUAAUAGCUUCUUAGGAGAAUGACAAAAAAAAAAAAAAAAAAAAAAAAAAAAAAAAA	AAAAGUAAUCGCGGUUUUUGUC
NC_045512.2	178	188	183	188	3.05	hsa-miR-18a-3p_MIMAT0002891	6	15	6	11	1.15	-5.61	-9.81	-0.654669	AGCUUCUUAGG&CCUAAGUGCU	(((..((((((&)))))).)))	CAAUCUUUAAUCAGUGUGUAACAUUAGGGAGGACUUGAAAGAGCCACCACAUUUUCACCGAGGCCACGCGGAGUACGAUCGAGUGUACAGUGAACAAUGCUAGGGAGAGCUGCCUAUAUGGAAGAGCCCUAAUGUGUAAAAUUAAUUUUAGUAGUGCUAUCCCCAUGUGAUUUUAAUAGCUUCUUAGGAGAAUGACAAAAAAAAAAAAAAAAAAAAAAAAAAAAAAAAA	ACUGCCCUAAGUGCUCCUUCUGG
NC_045512.2	90	96	90	95	1.32	hsa-miR-30e-3p_MIMAT0000693	13	19	14	19	0.2	-5.61	-7.13	-0.658083	GUGAACA&UGUUUAC	(((((((&)))))))	CAAUCUUUAAUCAGUGUGUAACAUUAGGGAGGACUUGAAAGAGCCACCACAUUUUCACCGAGGCCACGCGGAGUACGAUCGAGUGUACAGUGAACAAUGCUAGGGAGAGCUGCCUAUAUGGAAGAGCCCUAAUGUGUAAAAUUAAUUUUAGUAGUGCUAUCCCCAUGUGAUUUUAAUAGCUUCUUAGGAGAAUGACAAAAAAAAAAAAAAAAAAAAAAAAAAAAAAAAA	CUUUCAGUCGGAUGUUUACAGC
NC_045512.2	148	157	148	153	2.37	hsa-miR-24-1-5p_MIMAT0000079	2	10	5	10	1.43	-5.6	-9.4	-0.65691	UUAGUAGUGC&GCCUACUGA	(((((((.((&)))))))))	CAAUCUUUAAUCAGUGUGUAACAUUAGGGAGGACUUGAAAGAGCCACCACAUUUUCACCGAGGCCACGCGGAGUACGAUCGAGUGUACAGUGAACAAUGCUAGGGAGAGCUGCCUAUAUGGAAGAGCCCUAAUGUGUAAAAUUAAUUUUAGUAGUGCUAUCCCCAUGUGAUUUUAAUAGCUUCUUAGGAGAAUGACAAAAAAAAAAAAAAAAAAAAAAAAAAAAAAAAA	UGCCUACUGAGCUGAUAUCAGU
NC_045512.2	28	44	39	44	5.83	hsa-miR-4677-5p_MIMAT0019760	3	17	3	8	2.81	-5.6	-14.24	-0.65691	GGAGGACUUGAAAGAGC&GUUCUUUGGUCUUUC	(((((((...(((((((&))))))).)))))))	CAAUCUUUAAUCAGUGUGUAACAUUAGGGAGGACUUGAAAGAGCCACCACAUUUUCACCGAGGCCACGCGGAGUACGAUCGAGUGUACAGUGAACAAUGCUAGGGAGAGCUGCCUAUAUGGAAGAGCCCUAAUGUGUAAAAUUAAUUUUAGUAGUGCUAUCCCCAUGUGAUUUUAAUAGCUUCUUAGGAGAAUGACAAAAAAAAAAAAAAAAAAAAAAAAAAAAAAAAA	UUGUUCUUUGGUCUUUCAGCCA
NC_045512.2	77	83	77	82	1.23	hsa-miR-6791-3p_MIMAT0027483	7	13	8	13	0.2	-5.6	-7.03	-0.660514	GAUCGAG&CUUGGUC	(((((((&)))))))	CAAUCUUUAAUCAGUGUGUAACAUUAGGGAGGACUUGAAAGAGCCACCACAUUUUCACCGAGGCCACGCGGAGUACGAUCGAGUGUACAGUGAACAAUGCUAGGGAGAGCUGCCUAUAUGGAAGAGCCCUAAUGUGUAAAAUUAAUUUUAGUAGUGCUAUCCCCAUGUGAUUUUAAUAGCUUCUUAGGAGAAUGACAAAAAAAAAAAAAAAAAAAAAAAAAAAAAAAAA	UGCCUCCUUGGUCUCCGGCAG
NC_045512.2	97	109	104	109	5.53	hsa-miR-642a-5p_MIMAT0003312	5	18	5	10	0.09	-5.59	-11.21	-0.655737	AUGCUAGGGAGAG&CUCUCCAAAUGUGU	((((...((((((&))))))....))))	CAAUCUUUAAUCAGUGUGUAACAUUAGGGAGGACUUGAAAGAGCCACCACAUUUUCACCGAGGCCACGCGGAGUACGAUCGAGUGUACAGUGAACAAUGCUAGGGAGAGCUGCCUAUAUGGAAGAGCCCUAAUGUGUAAAAUUAAUUUUAGUAGUGCUAUCCCCAUGUGAUUUUAAUAGCUUCUUAGGAGAAUGACAAAAAAAAAAAAAAAAAAAAAAAAAAAAAAAAA	GUCCCUCUCCAAAUGUGUCUUG
NC_045512.2	60	87	82	87	7.65	hsa-miR-885-5p_MIMAT0004947	6	21	6	11	0.05	-5.59	-13.29	-0.655737	GAGGCCACGCGGAGUACGAUCGAGUGUA&UACACUACCCUGCCUC	(((((.....((.((.......((((((&)))))))))).)))))	CAAUCUUUAAUCAGUGUGUAACAUUAGGGAGGACUUGAAAGAGCCACCACAUUUUCACCGAGGCCACGCGGAGUACGAUCGAGUGUACAGUGAACAAUGCUAGGGAGAGCUGCCUAUAUGGAAGAGCCCUAAUGUGUAAAAUUAAUUUUAGUAGUGCUAUCCCCAUGUGAUUUUAAUAGCUUCUUAGGAGAAUGACAAAAAAAAAAAAAAAAAAAAAAAAAAAAAAAAA	UCCAUUACACUACCCUGCCUCU
NC_045512.2	10	18	10	15	2.05	hsa-miR-21-5p_MIMAT0000076	9	17	12	17	1.71	-5.58	-9.34	-0.654564	AUCAGUGUG&CAGACUGAU	((((((.((&)).))))))	CAAUCUUUAAUCAGUGUGUAACAUUAGGGAGGACUUGAAAGAGCCACCACAUUUUCACCGAGGCCACGCGGAGUACGAUCGAGUGUACAGUGAACAAUGCUAGGGAGAGCUGCCUAUAUGGAAGAGCCCUAAUGUGUAAAAUUAAUUUUAGUAGUGCUAUCCCCAUGUGAUUUUAAUAGCUUCUUAGGAGAAUGACAAAAAAAAAAAAAAAAAAAAAAAAAAAAAAAAA	UAGCUUAUCAGACUGAUGUUGA
NC_045512.2	88	115	110	115	9.12	hsa-miR-449b-5p_MIMAT0003327	1	20	1	6	4.13	-5.58	-18.83	-0.654564	CAGUGAACAAUGCUAGGGAGAGCUGCCU&AGGCAGUGUAUUGUUAGCUG	(((..((((((((.........((((((&)))))).))))))))..)))	CAAUCUUUAAUCAGUGUGUAACAUUAGGGAGGACUUGAAAGAGCCACCACAUUUUCACCGAGGCCACGCGGAGUACGAUCGAGUGUACAGUGAACAAUGCUAGGGAGAGCUGCCUAUAUGGAAGAGCCCUAAUGUGUAAAAUUAAUUUUAGUAGUGCUAUCCCCAUGUGAUUUUAAUAGCUUCUUAGGAGAAUGACAAAAAAAAAAAAAAAAAAAAAAAAAAAAAAAAA	AGGCAGUGUAUUGUUAGCUGGC
NC_045512.2	191	197	192	197	0.57	hsa-miR-513b-5p_MIMAT0005788	13	19	13	18	0.98	-5.58	-7.13	-0.654564	AAUGACA&UGUCAUU	(((((((&)))))))	CAAUCUUUAAUCAGUGUGUAACAUUAGGGAGGACUUGAAAGAGCCACCACAUUUUCACCGAGGCCACGCGGAGUACGAUCGAGUGUACAGUGAACAAUGCUAGGGAGAGCUGCCUAUAUGGAAGAGCCCUAAUGUGUAAAAUUAAUUUUAGUAGUGCUAUCCCCAUGUGAUUUUAAUAGCUUCUUAGGAGAAUGACAAAAAAAAAAAAAAAAAAAAAAAAAAAAAAAAA	UUCACAAGGAGGUGUCAUUUAU
NC_045512.2	95	116	110	115	7.45	hsa-miR-6509-5p_MIMAT0025474	3	17	4	9	0.18	-5.58	-13.21	-0.658155	CAAUGCUAGGGAGAGCUGCCUA&UAGGUAGUGGCAGUG	((.(((((.......(((((((&)))))))))))).))	CAAUCUUUAAUCAGUGUGUAACAUUAGGGAGGACUUGAAAGAGCCACCACAUUUUCACCGAGGCCACGCGGAGUACGAUCGAGUGUACAGUGAACAAUGCUAGGGAGAGCUGCCUAUAUGGAAGAGCCCUAAUGUGUAAAAUUAAUUUUAGUAGUGCUAUCCCCAUGUGAUUUUAAUAGCUUCUUAGGAGAAUGACAAAAAAAAAAAAAAAAAAAAAAAAAAAAAAAAA	AUUAGGUAGUGGCAGUGGAAC
NC_045512.2	63	76	71	76	4.16	hsa-miR-20b-5p_MIMAT0001413	5	17	5	10	2.83	-5.55	-12.54	-0.647667	GCCACGCGGAGUAC&GUGCUCAUAGUGC	((.((...((((((&))))))...))))	CAAUCUUUAAUCAGUGUGUAACAUUAGGGAGGACUUGAAAGAGCCACCACAUUUUCACCGAGGCCACGCGGAGUACGAUCGAGUGUACAGUGAACAAUGCUAGGGAGAGCUGCCUAUAUGGAAGAGCCCUAAUGUGUAAAAUUAAUUUUAGUAGUGCUAUCCCCAUGUGAUUUUAAUAGCUUCUUAGGAGAAUGACAAAAAAAAAAAAAAAAAAAAAAAAAAAAAAAAA	CAAAGUGCUCAUAGUGCAGGUAG
NC_045512.2	116	124	119	124	3.74	hsa-miR-302a-3p_MIMAT0000684	7	15	7	12	2.02	-5.55	-11.31	-0.647667	AUAUGGAAG&CUUCCAUGU	(((((((((&)))))))))	CAAUCUUUAAUCAGUGUGUAACAUUAGGGAGGACUUGAAAGAGCCACCACAUUUUCACCGAGGCCACGCGGAGUACGAUCGAGUGUACAGUGAACAAUGCUAGGGAGAGCUGCCUAUAUGGAAGAGCCCUAAUGUGUAAAAUUAAUUUUAGUAGUGCUAUCCCCAUGUGAUUUUAAUAGCUUCUUAGGAGAAUGACAAAAAAAAAAAAAAAAAAAAAAAAAAAAAAAAA	UAAGUGCUUCCAUGUUUUGGUGA
NC_045512.2	93	115	110	115	7.37	hsa-miR-98-5p_MIMAT0000096	3	22	3	8	0.35	-5.55	-13.27	-0.651044	AACAAUGCUAGGGAGAGCUGCCU&AGGUAGUAAGUUGUAUUGUU	((((((((.........((((((&))))))......))))))))	CAAUCUUUAAUCAGUGUGUAACAUUAGGGAGGACUUGAAAGAGCCACCACAUUUUCACCGAGGCCACGCGGAGUACGAUCGAGUGUACAGUGAACAAUGCUAGGGAGAGCUGCCUAUAUGGAAGAGCCCUAAUGUGUAAAAUUAAUUUUAGUAGUGCUAUCCCCAUGUGAUUUUAAUAGCUUCUUAGGAGAAUGACAAAAAAAAAAAAAAAAAAAAAAAAAAAAAAAAA	UGAGGUAGUAAGUUGUAUUGUU
NC_045512.2	27	32	27	32	3.52	hsa-miR-93-3p_MIMAT0004509	16	21	16	21	0.01	-5.55	-9.08	-0.651044	GGGAGG&CUUCCC	((((((&))))))	CAAUCUUUAAUCAGUGUGUAACAUUAGGGAGGACUUGAAAGAGCCACCACAUUUUCACCGAGGCCACGCGGAGUACGAUCGAGUGUACAGUGAACAAUGCUAGGGAGAGCUGCCUAUAUGGAAGAGCCCUAAUGUGUAAAAUUAAUUUUAGUAGUGCUAUCCCCAUGUGAUUUUAAUAGCUUCUUAGGAGAAUGACAAAAAAAAAAAAAAAAAAAAAAAAAAAAAAAAA	ACUGCUGAGCUAGCACUUCCCG
NC_045512.2	58	65	59	64	3.77	hsa-miR-548at-5p_MIMAT0022277	13	20	14	19	1.39	-5.54	-10.7	-0.649871	CCGAGGCC&GGUUUUGG	((((((((&))))))))	CAAUCUUUAAUCAGUGUGUAACAUUAGGGAGGACUUGAAAGAGCCACCACAUUUUCACCGAGGCCACGCGGAGUACGAUCGAGUGUACAGUGAACAAUGCUAGGGAGAGCUGCCUAUAUGGAAGAGCCCUAAUGUGUAAAAUUAAUUUUAGUAGUGCUAUCCCCAUGUGAUUUUAAUAGCUUCUUAGGAGAAUGACAAAAAAAAAAAAAAAAAAAAAAAAAAAAAAAAA	AAAAGUUAUUGCGGUUUUGGCU
NC_045512.2	102	113	102	107	4.15	hsa-let-7d-3p_MIMAT0004484	12	22	17	22	0.06	-5.52	-9.73	-0.647525	AGGGAGAGCUGC&GCUGCCUUUCU	((((((.((.((&)).))))))))	CAAUCUUUAAUCAGUGUGUAACAUUAGGGAGGACUUGAAAGAGCCACCACAUUUUCACCGAGGCCACGCGGAGUACGAUCGAGUGUACAGUGAACAAUGCUAGGGAGAGCUGCCUAUAUGGAAGAGCCCUAAUGUGUAAAAUUAAUUUUAGUAGUGCUAUCCCCAUGUGAUUUUAAUAGCUUCUUAGGAGAAUGACAAAAAAAAAAAAAAAAAAAAAAAAAAAAAAAAA	CUAUACGACCUGCUGCCUUUCU
NC_045512.2	27	46	40	45	6.05	hsa-miR-182-3p_MIMAT0000260	1	16	2	7	2.86	-5.51	-14.42	-0.649899	GGGAGGACUUGAAAGAGCCA&UGGUUCUAGACUUGCC	((.(((.((....(((((((&))))))))).))).))	CAAUCUUUAAUCAGUGUGUAACAUUAGGGAGGACUUGAAAGAGCCACCACAUUUUCACCGAGGCCACGCGGAGUACGAUCGAGUGUACAGUGAACAAUGCUAGGGAGAGCUGCCUAUAUGGAAGAGCCCUAAUGUGUAAAAUUAAUUUUAGUAGUGCUAUCCCCAUGUGAUUUUAAUAGCUUCUUAGGAGAAUGACAAAAAAAAAAAAAAAAAAAAAAAAAAAAAAAAA	UGGUUCUAGACUUGCCAACUA
NC_045512.2	159	164	159	164	1.92	hsa-miR-542-5p_MIMAT0003340	3	8	3	8	3	-5.51	-10.43	-0.642999	AUCCCC&GGGGAU	((((((&))))))	CAAUCUUUAAUCAGUGUGUAACAUUAGGGAGGACUUGAAAGAGCCACCACAUUUUCACCGAGGCCACGCGGAGUACGAUCGAGUGUACAGUGAACAAUGCUAGGGAGAGCUGCCUAUAUGGAAGAGCCCUAAUGUGUAAAAUUAAUUUUAGUAGUGCUAUCCCCAUGUGAUUUUAAUAGCUUCUUAGGAGAAUGACAAAAAAAAAAAAAAAAAAAAAAAAAAAAAAAAA	UCGGGGAUCAUCAUGUCACGAGA
NC_045512.2	110	125	120	125	5.83	hsa-miR-4778-3p_MIMAT0019937	4	16	4	9	1.41	-5.49	-12.73	-0.644006	CUGCCUAUAUGGAAGA&UCUUCCUUUGCAG	((((......((((((&))))))...))))	CAAUCUUUAAUCAGUGUGUAACAUUAGGGAGGACUUGAAAGAGCCACCACAUUUUCACCGAGGCCACGCGGAGUACGAUCGAGUGUACAGUGAACAAUGCUAGGGAGAGCUGCCUAUAUGGAAGAGCCCUAAUGUGUAAAAUUAAUUUUAGUAGUGCUAUCCCCAUGUGAUUUUAAUAGCUUCUUAGGAGAAUGACAAAAAAAAAAAAAAAAAAAAAAAAAAAAAAAAA	UCUUCUUCCUUUGCAGAGUUGA
NC_045512.2	123	139	133	138	3.48	hsa-miR-656-3p_MIMAT0003332	5	21	6	11	0.03	-5.49	-9	-0.64754	AGAGCCCUAAUGUGUAA&UUAUACAGUCAACCUCU	((((......(((((((&)))))))......))))	CAAUCUUUAAUCAGUGUGUAACAUUAGGGAGGACUUGAAAGAGCCACCACAUUUUCACCGAGGCCACGCGGAGUACGAUCGAGUGUACAGUGAACAAUGCUAGGGAGAGCUGCCUAUAUGGAAGAGCCCUAAUGUGUAAAAUUAAUUUUAGUAGUGCUAUCCCCAUGUGAUUUUAAUAGCUUCUUAGGAGAAUGACAAAAAAAAAAAAAAAAAAAAAAAAAAAAAAAAA	AAUAUUAUACAGUCAACCUCU
NC_045512.2	109	124	119	124	5.8	hsa-miR-30a-3p_MIMAT0000088	1	22	1	6	0.55	-5.48	-11.83	-0.642833	GCUGCCUAUAUGGAAG&CUUUCAGUCGGAUGUUUGCAGC	(((((..(((((((((&))))))......)))..)))))	CAAUCUUUAAUCAGUGUGUAACAUUAGGGAGGACUUGAAAGAGCCACCACAUUUUCACCGAGGCCACGCGGAGUACGAUCGAGUGUACAGUGAACAAUGCUAGGGAGAGCUGCCUAUAUGGAAGAGCCCUAAUGUGUAAAAUUAAUUUUAGUAGUGCUAUCCCCAUGUGAUUUUAAUAGCUUCUUAGGAGAAUGACAAAAAAAAAAAAAAAAAAAAAAAAAAAAAAAAA	CUUUCAGUCGGAUGUUUGCAGC
NC_045512.2	24	29	24	29	2.99	hsa-miR-365b-3p_MIMAT0022834	7	12	7	12	0.02	-5.48	-8.49	-0.642833	UUAGGG&CCCUAA	((((((&))))))	CAAUCUUUAAUCAGUGUGUAACAUUAGGGAGGACUUGAAAGAGCCACCACAUUUUCACCGAGGCCACGCGGAGUACGAUCGAGUGUACAGUGAACAAUGCUAGGGAGAGCUGCCUAUAUGGAAGAGCCCUAAUGUGUAAAAUUAAUUUUAGUAGUGCUAUCCCCAUGUGAUUUUAAUAGCUUCUUAGGAGAAUGACAAAAAAAAAAAAAAAAAAAAAAAAAAAAAAAAA	UAAUGCCCCUAAAAAUCCUUAU
NC_045512.2	24	29	24	29	2.99	hsa-miR-365a-3p_MIMAT0000710	7	12	7	12	0.02	-5.48	-8.49	-0.642833	UUAGGG&CCCUAA	((((((&))))))	CAAUCUUUAAUCAGUGUGUAACAUUAGGGAGGACUUGAAAGAGCCACCACAUUUUCACCGAGGCCACGCGGAGUACGAUCGAGUGUACAGUGAACAAUGCUAGGGAGAGCUGCCUAUAUGGAAGAGCCCUAAUGUGUAAAAUUAAUUUUAGUAGUGCUAUCCCCAUGUGAUUUUAAUAGCUUCUUAGGAGAAUGACAAAAAAAAAAAAAAAAAAAAAAAAAAAAAAAAA	UAAUGCCCCUAAAAAUCCUUAU
NC_045512.2	186	191	186	191	2.54	hsa-miR-376a-5p_MIMAT0003386	7	12	7	12	0.04	-5.48	-8.06	-0.642833	AGGAGA&UCUCCU	((((((&))))))	CAAUCUUUAAUCAGUGUGUAACAUUAGGGAGGACUUGAAAGAGCCACCACAUUUUCACCGAGGCCACGCGGAGUACGAUCGAGUGUACAGUGAACAAUGCUAGGGAGAGCUGCCUAUAUGGAAGAGCCCUAAUGUGUAAAAUUAAUUUUAGUAGUGCUAUCCCCAUGUGAUUUUAAUAGCUUCUUAGGAGAAUGACAAAAAAAAAAAAAAAAAAAAAAAAAAAAAAAAA	GUAGAUUCUCCUUCUAUGAGUA
NC_045512.2	178	192	186	191	4.99	hsa-miR-4659b-3p_MIMAT0019734	2	22	3	8	0.64	-5.48	-11.11	-0.642833	AGCUUCUUAGGAGAA&UUCUUCUUAGACAUGGCAGCU	(((((((.(((((((&))))))).)))......))))	CAAUCUUUAAUCAGUGUGUAACAUUAGGGAGGACUUGAAAGAGCCACCACAUUUUCACCGAGGCCACGCGGAGUACGAUCGAGUGUACAGUGAACAAUGCUAGGGAGAGCUGCCUAUAUGGAAGAGCCCUAAUGUGUAAAAUUAAUUUUAGUAGUGCUAUCCCCAUGUGAUUUUAAUAGCUUCUUAGGAGAAUGACAAAAAAAAAAAAAAAAAAAAAAAAAAAAAAAAA	UUUCUUCUUAGACAUGGCAGCU
NC_045512.2	39	48	40	45	1.83	hsa-miR-125b-1-3p_MIMAT0004592	4	15	9	14	5.31	-5.47	-12.61	-0.64166	AAGAGCCACC&GGUUAGGCUCUU	(((((((.((&))...)))))))	CAAUCUUUAAUCAGUGUGUAACAUUAGGGAGGACUUGAAAGAGCCACCACAUUUUCACCGAGGCCACGCGGAGUACGAUCGAGUGUACAGUGAACAAUGCUAGGGAGAGCUGCCUAUAUGGAAGAGCCCUAAUGUGUAAAAUUAAUUUUAGUAGUGCUAUCCCCAUGUGAUUUUAAUAGCUUCUUAGGAGAAUGACAAAAAAAAAAAAAAAAAAAAAAAAAAAAAAAAA	ACGGGUUAGGCUCUUGGGAGCU
NC_045512.2	192	197	192	197	0.57	hsa-miR-425-3p_MIMAT0001343	9	14	9	14	0.24	-5.47	-6.28	-0.64166	AUGACA&UGUCGU	((((((&))))))	CAAUCUUUAAUCAGUGUGUAACAUUAGGGAGGACUUGAAAGAGCCACCACAUUUUCACCGAGGCCACGCGGAGUACGAUCGAGUGUACAGUGAACAAUGCUAGGGAGAGCUGCCUAUAUGGAAGAGCCCUAAUGUGUAAAAUUAAUUUUAGUAGUGCUAUCCCCAUGUGAUUUUAAUAGCUUCUUAGGAGAAUGACAAAAAAAAAAAAAAAAAAAAAAAAAAAAAAAAA	AUCGGGAAUGUCGUGUCCGCCC
NC_045512.2	163	173	167	172	2.85	hsa-miR-224-5p_MIMAT0000281	3	15	4	9	0.45	-5.46	-8.76	-0.631024	CCAUGUGAUUU&AAGUCACUAGUGG	(((.(((((((&)))))))...)))	CAAUCUUUAAUCAGUGUGUAACAUUAGGGAGGACUUGAAAGAGCCACCACAUUUUCACCGAGGCCACGCGGAGUACGAUCGAGUGUACAGUGAACAAUGCUAGGGAGAGCUGCCUAUAUGGAAGAGCCCUAAUGUGUAAAAUUAAUUUUAGUAGUGCUAUCCCCAUGUGAUUUUAAUAGCUUCUUAGGAGAAUGACAAAAAAAAAAAAAAAAAAAAAAAAAAAAAAAAA	UCAAGUCACUAGUGGUUCCGUUUAG
NC_045512.2	81	90	85	90	2.91	hsa-miR-195-3p_MIMAT0004615	11	21	11	16	1.46	-5.45	-9.82	-0.639314	GAGUGUACAG&CUGUGCUGCUC	(((.((((((&))))))..)))	CAAUCUUUAAUCAGUGUGUAACAUUAGGGAGGACUUGAAAGAGCCACCACAUUUUCACCGAGGCCACGCGGAGUACGAUCGAGUGUACAGUGAACAAUGCUAGGGAGAGCUGCCUAUAUGGAAGAGCCCUAAUGUGUAAAAUUAAUUUUAGUAGUGCUAUCCCCAUGUGAUUUUAAUAGCUUCUUAGGAGAAUGACAAAAAAAAAAAAAAAAAAAAAAAAAAAAAAAAA	CCAAUAUUGGCUGUGCUGCUCC
NC_045512.2	88	93	88	93	1.93	hsa-miR-181b-2-3p_MIMAT0031893	2	7	2	7	0.34	-5.45	-7.72	-0.646542	CAGUGA&UCACUG	((((((&))))))	CAAUCUUUAAUCAGUGUGUAACAUUAGGGAGGACUUGAAAGAGCCACCACAUUUUCACCGAGGCCACGCGGAGUACGAUCGAGUGUACAGUGAACAAUGCUAGGGAGAGCUGCCUAUAUGGAAGAGCCCUAAUGUGUAAAAUUAAUUUUAGUAGUGCUAUCCCCAUGUGAUUUUAAUAGCUUCUUAGGAGAAUGACAAAAAAAAAAAAAAAAAAAAAAAAAAAAAAAAA	CUCACUGAUCAAUGAAUGCA
NC_045512.2	30	37	32	37	2.75	hsa-miR-378a-5p_MIMAT0000731	11	18	11	16	4.04	-5.45	-12.24	-0.639314	AGGACUUG&CAGGUCCU	((((((((&))))))))	CAAUCUUUAAUCAGUGUGUAACAUUAGGGAGGACUUGAAAGAGCCACCACAUUUUCACCGAGGCCACGCGGAGUACGAUCGAGUGUACAGUGAACAAUGCUAGGGAGAGCUGCCUAUAUGGAAGAGCCCUAAUGUGUAAAAUUAAUUUUAGUAGUGCUAUCCCCAUGUGAUUUUAAUAGCUUCUUAGGAGAAUGACAAAAAAAAAAAAAAAAAAAAAAAAAAAAAAAAA	CUCCUGACUCCAGGUCCUGUGU
NC_045512.2	152	168	163	168	4.47	hsa-miR-379-3p_MIMAT0004690	7	19	7	12	0.38	-5.44	-10.29	-0.638141	UAGUGCUAUCCCCAUGU&ACAUGGUCCACUA	(((((......((((((&))))))..)))))	CAAUCUUUAAUCAGUGUGUAACAUUAGGGAGGACUUGAAAGAGCCACCACAUUUUCACCGAGGCCACGCGGAGUACGAUCGAGUGUACAGUGAACAAUGCUAGGGAGAGCUGCCUAUAUGGAAGAGCCCUAAUGUGUAAAAUUAAUUUUAGUAGUGCUAUCCCCAUGUGAUUUUAAUAGCUUCUUAGGAGAAUGACAAAAAAAAAAAAAAAAAAAAAAAAAAAAAAAAA	UAUGUAACAUGGUCCACUAACU
NC_045512.2	49	60	55	60	2.39	hsa-miR-433-5p_MIMAT0026554	3	14	3	8	2.48	-5.44	-10.31	-0.638141	ACAUUUUCACCG&CGGUGAGCCUGU	(((...((((((&))))))...)))	CAAUCUUUAAUCAGUGUGUAACAUUAGGGAGGACUUGAAAGAGCCACCACAUUUUCACCGAGGCCACGCGGAGUACGAUCGAGUGUACAGUGAACAAUGCUAGGGAGAGCUGCCUAUAUGGAAGAGCCCUAAUGUGUAAAAUUAAUUUUAGUAGUGCUAUCCCCAUGUGAUUUUAAUAGCUUCUUAGGAGAAUGACAAAAAAAAAAAAAAAAAAAAAAAAAAAAAAAAA	UACGGUGAGCCUGUCAUUAUUC
NC_045512.2	183	190	183	188	3.48	hsa-miR-1343-3p_MIMAT0019776	1	8	3	8	2.04	-5.43	-10.95	-0.636968	CUUAGGAG&CUCCUGGG	((((((((&))))))))	CAAUCUUUAAUCAGUGUGUAACAUUAGGGAGGACUUGAAAGAGCCACCACAUUUUCACCGAGGCCACGCGGAGUACGAUCGAGUGUACAGUGAACAAUGCUAGGGAGAGCUGCCUAUAUGGAAGAGCCCUAAUGUGUAAAAUUAAUUUUAGUAGUGCUAUCCCCAUGUGAUUUUAAUAGCUUCUUAGGAGAAUGACAAAAAAAAAAAAAAAAAAAAAAAAAAAAAAAAA	CUCCUGGGGCCCGCACUCUCGC
NC_045512.2	178	184	178	183	2.1	hsa-miR-485-5p_MIMAT0002175	1	7	2	7	0.64	-5.43	-8.17	-0.636968	AGCUUCU&AGAGGCU	(((((((&)))))))	CAAUCUUUAAUCAGUGUGUAACAUUAGGGAGGACUUGAAAGAGCCACCACAUUUUCACCGAGGCCACGCGGAGUACGAUCGAGUGUACAGUGAACAAUGCUAGGGAGAGCUGCCUAUAUGGAAGAGCCCUAAUGUGUAAAAUUAAUUUUAGUAGUGCUAUCCCCAUGUGAUUUUAAUAGCUUCUUAGGAGAAUGACAAAAAAAAAAAAAAAAAAAAAAAAAAAAAAAAA	AGAGGCUGGCCGUGAUGAAUUC
NC_045512.2	100	110	100	105	4.13	hsa-miR-6791-3p_MIMAT0027483	2	11	6	11	4.1	-5.43	-13.66	-0.640463	CUAGGGAGAGC&GCCUCCUUGG	((((((((.((&))))))))))	CAAUCUUUAAUCAGUGUGUAACAUUAGGGAGGACUUGAAAGAGCCACCACAUUUUCACCGAGGCCACGCGGAGUACGAUCGAGUGUACAGUGAACAAUGCUAGGGAGAGCUGCCUAUAUGGAAGAGCCCUAAUGUGUAAAAUUAAUUUUAGUAGUGCUAUCCCCAUGUGAUUUUAAUAGCUUCUUAGGAGAAUGACAAAAAAAAAAAAAAAAAAAAAAAAAAAAAAAAA	UGCCUCCUUGGUCUCCGGCAG
NC_045512.2	166	173	166	171	2.29	hsa-miR-7-1-3p_MIMAT0004553	5	12	7	12	0.03	-5.43	-7.75	-0.636968	UGUGAUUU&AAAUCACA	((((((((&))))))))	CAAUCUUUAAUCAGUGUGUAACAUUAGGGAGGACUUGAAAGAGCCACCACAUUUUCACCGAGGCCACGCGGAGUACGAUCGAGUGUACAGUGAACAAUGCUAGGGAGAGCUGCCUAUAUGGAAGAGCCCUAAUGUGUAAAAUUAAUUUUAGUAGUGCUAUCCCCAUGUGAUUUUAAUAGCUUCUUAGGAGAAUGACAAAAAAAAAAAAAAAAAAAAAAAAAAAAAAAAA	CAACAAAUCACAGUCUGCCAUA
NC_045512.2	78	92	85	90	3.45	hsa-miR-3189-5p_MIMAT0019217	6	21	9	14	4.98	-5.42	-13.85	-0.626401	AUCGAGUGUACAGUG&CAUCUGUGCCCUGGGU	(((.((.((((((((&)).)))))).)).)))	CAAUCUUUAAUCAGUGUGUAACAUUAGGGAGGACUUGAAAGAGCCACCACAUUUUCACCGAGGCCACGCGGAGUACGAUCGAGUGUACAGUGAACAAUGCUAGGGAGAGCUGCCUAUAUGGAAGAGCCCUAAUGUGUAAAAUUAAUUUUAGUAGUGCUAUCCCCAUGUGAUUUUAAUAGCUUCUUAGGAGAAUGACAAAAAAAAAAAAAAAAAAAAAAAAAAAAAAAAA	UGCCCCAUCUGUGCCCUGGGUAGGA
NC_045512.2	128	135	129	134	2.29	hsa-miR-629-5p_MIMAT0004810	8	15	9	14	1.32	-5.42	-9.03	-0.639283	CCUAAUGU&ACGUUGGG	((((((((&))))))))	CAAUCUUUAAUCAGUGUGUAACAUUAGGGAGGACUUGAAAGAGCCACCACAUUUUCACCGAGGCCACGCGGAGUACGAUCGAGUGUACAGUGAACAAUGCUAGGGAGAGCUGCCUAUAUGGAAGAGCCCUAAUGUGUAAAAUUAAUUUUAGUAGUGCUAUCCCCAUGUGAUUUUAAUAGCUUCUUAGGAGAAUGACAAAAAAAAAAAAAAAAAAAAAAAAAAAAAAAAA	UGGGUUUACGUUGGGAGAACU
NC_045512.2	151	156	151	156	2.05	hsa-miR-885-5p_MIMAT0004947	8	13	8	13	0.04	-5.42	-7.51	-0.635795	GUAGUG&CACUAC	((((((&))))))	CAAUCUUUAAUCAGUGUGUAACAUUAGGGAGGACUUGAAAGAGCCACCACAUUUUCACCGAGGCCACGCGGAGUACGAUCGAGUGUACAGUGAACAAUGCUAGGGAGAGCUGCCUAUAUGGAAGAGCCCUAAUGUGUAAAAUUAAUUUUAGUAGUGCUAUCCCCAUGUGAUUUUAAUAGCUUCUUAGGAGAAUGACAAAAAAAAAAAAAAAAAAAAAAAAAAAAAAAAA	UCCAUUACACUACCCUGCCUCU
NC_045512.2	178	183	178	183	1.98	hsa-miR-3928-5p_MIMAT0027037	2	7	2	7	0.25	-5.41	-7.64	-0.63133	AGCUUC&GAAGCU	((((((&))))))	CAAUCUUUAAUCAGUGUGUAACAUUAGGGAGGACUUGAAAGAGCCACCACAUUUUCACCGAGGCCACGCGGAGUACGAUCGAGUGUACAGUGAACAAUGCUAGGGAGAGCUGCCUAUAUGGAAGAGCCCUAAUGUGUAAAAUUAAUUUUAGUAGUGCUAUCCCCAUGUGAUUUUAAUAGCUUCUUAGGAGAAUGACAAAAAAAAAAAAAAAAAAAAAAAAAAAAAAAAA	UGAAGCUCUAAGGUUCCGCCUGC
NC_045512.2	183	197	186	191	4.18	hsa-miR-5004-3p_MIMAT0021028	3	16	8	13	2.6	-5.41	-12.19	-0.634622	CUUAGGAGAAUGACA&UGGAUUUUCCUGGG	(((((((((((..((&)).)))))))))))	CAAUCUUUAAUCAGUGUGUAACAUUAGGGAGGACUUGAAAGAGCCACCACAUUUUCACCGAGGCCACGCGGAGUACGAUCGAGUGUACAGUGAACAAUGCUAGGGAGAGCUGCCUAUAUGGAAGAGCCCUAAUGUGUAAAAUUAAUUUUAGUAGUGCUAUCCCCAUGUGAUUUUAAUAGCUUCUUAGGAGAAUGACAAAAAAAAAAAAAAAAAAAAAAAAAAAAAAAAA	CUUGGAUUUUCCUGGGCCUCAG
NC_045512.2	186	192	186	191	2.63	hsa-miR-605-5p_MIMAT0003273	17	23	18	23	0.78	-5.41	-8.82	-0.63133	AGGAGAA&UUCUCCU	(((((((&)))))))	CAAUCUUUAAUCAGUGUGUAACAUUAGGGAGGACUUGAAAGAGCCACCACAUUUUCACCGAGGCCACGCGGAGUACGAUCGAGUGUACAGUGAACAAUGCUAGGGAGAGCUGCCUAUAUGGAAGAGCCCUAAUGUGUAAAAUUAAUUUUAGUAGUGCUAUCCCCAUGUGAUUUUAAUAGCUUCUUAGGAGAAUGACAAAAAAAAAAAAAAAAAAAAAAAAAAAAAAAAA	UAAAUCCCAUGGUGCCUUCUCCU
NC_045512.2	63	70	65	70	3.3	hsa-miR-3187-5p_MIMAT0019216	10	17	10	15	6.48	-5.4	-15.18	-0.630163	GCCACGCG&CGUGUGGC	((((((((&))))))))	CAAUCUUUAAUCAGUGUGUAACAUUAGGGAGGACUUGAAAGAGCCACCACAUUUUCACCGAGGCCACGCGGAGUACGAUCGAGUGUACAGUGAACAAUGCUAGGGAGAGCUGCCUAUAUGGAAGAGCCCUAAUGUGUAAAAUUAAUUUUAGUAGUGCUAUCCCCAUGUGAUUUUAAUAGCUUCUUAGGAGAAUGACAAAAAAAAAAAAAAAAAAAAAAAAAAAAAAAAA	CCUGGGCAGCGUGUGGCUGAAGG
NC_045512.2	61	67	61	66	1.98	hsa-miR-548az-5p_MIMAT0025456	12	18	13	18	0.7	-5.4	-8.08	-0.633449	AGGCCAC&GUGGUUU	(((((((&)))))))	CAAUCUUUAAUCAGUGUGUAACAUUAGGGAGGACUUGAAAGAGCCACCACAUUUUCACCGAGGCCACGCGGAGUACGAUCGAGUGUACAGUGAACAAUGCUAGGGAGAGCUGCCUAUAUGGAAGAGCCCUAAUGUGUAAAAUUAAUUUUAGUAGUGCUAUCCCCAUGUGAUUUUAAUAGCUUCUUAGGAGAAUGACAAAAAAAAAAAAAAAAAAAAAAAAAAAAAAAAA	CAAAAGUGAUUGUGGUUUUUGC
NC_045512.2	162	185	179	184	6.38	hsa-miR-708-5p_MIMAT0004926	1	23	2	7	3.75	-5.4	-15.53	-0.630163	CCCAUGUGAUUUUAAUAGCUUCUU&AAGGAGCUUACAAUCUAGCUGGG	((((...((((.....((((((((&))))))))...))))....))))	CAAUCUUUAAUCAGUGUGUAACAUUAGGGAGGACUUGAAAGAGCCACCACAUUUUCACCGAGGCCACGCGGAGUACGAUCGAGUGUACAGUGAACAAUGCUAGGGAGAGCUGCCUAUAUGGAAGAGCCCUAAUGUGUAAAAUUAAUUUUAGUAGUGCUAUCCCCAUGUGAUUUUAAUAGCUUCUUAGGAGAAUGACAAAAAAAAAAAAAAAAAAAAAAAAAAAAAAAAA	AAGGAGCUUACAAUCUAGCUGGG
NC_045512.2	11	23	18	23	2.04	hsa-miR-3942-5p_MIMAT0018358	10	19	10	15	1.02	-5.39	-8.45	-0.632276	UCAGUGUGUAACA&UGUUACCUGA	((((...((((((&))))))))))	CAAUCUUUAAUCAGUGUGUAACAUUAGGGAGGACUUGAAAGAGCCACCACAUUUUCACCGAGGCCACGCGGAGUACGAUCGAGUGUACAGUGAACAAUGCUAGGGAGAGCUGCCUAUAUGGAAGAGCCCUAAUGUGUAAAAUUAAUUUUAGUAGUGCUAUCCCCAUGUGAUUUUAAUAGCUUCUUAGGAGAAUGACAAAAAAAAAAAAAAAAAAAAAAAAAAAAAAAAA	AAGCAAUACUGUUACCUGAAAU
NC_045512.2	116	128	123	128	4.46	hsa-miR-135a-5p_MIMAT0000428	4	21	4	9	0.54	-5.38	-10.38	-0.627829	AUAUGGAAGAGCC&GGCUUUUUAUUCCUAUGU	(((((((((((((&))))))).....))))))	CAAUCUUUAAUCAGUGUGUAACAUUAGGGAGGACUUGAAAGAGCCACCACAUUUUCACCGAGGCCACGCGGAGUACGAUCGAGUGUACAGUGAACAAUGCUAGGGAGAGCUGCCUAUAUGGAAGAGCCCUAAUGUGUAAAAUUAAUUUUAGUAGUGCUAUCCCCAUGUGAUUUUAAUAGCUUCUUAGGAGAAUGACAAAAAAAAAAAAAAAAAAAAAAAAAAAAAAAAA	UAUGGCUUUUUAUUCCUAUGUGA
NC_045512.2	16	30	16	21	3.83	hsa-miR-26a-1-3p_MIMAT0004499	5	21	16	21	0.79	-5.37	-9.99	-0.629929	GUGUAACAUUAGGGA&UUCUUGGUUACUUGCAC	((((((.((((((((&))))))))...))))))	CAAUCUUUAAUCAGUGUGUAACAUUAGGGAGGACUUGAAAGAGCCACCACAUUUUCACCGAGGCCACGCGGAGUACGAUCGAGUGUACAGUGAACAAUGCUAGGGAGAGCUGCCUAUAUGGAAGAGCCCUAAUGUGUAAAAUUAAUUUUAGUAGUGCUAUCCCCAUGUGAUUUUAAUAGCUUCUUAGGAGAAUGACAAAAAAAAAAAAAAAAAAAAAAAAAAAAAAAAA	CCUAUUCUUGGUUACUUGCACG
NC_045512.2	6	15	10	15	2.13	hsa-miR-582-3p_MIMAT0004797	3	12	3	8	2.29	-5.36	-9.78	-0.628756	UUUAAUCAGU&ACUGGUUGAA	((((((((((&))))))))))	CAAUCUUUAAUCAGUGUGUAACAUUAGGGAGGACUUGAAAGAGCCACCACAUUUUCACCGAGGCCACGCGGAGUACGAUCGAGUGUACAGUGAACAAUGCUAGGGAGAGCUGCCUAUAUGGAAGAGCCCUAAUGUGUAAAAUUAAUUUUAGUAGUGCUAUCCCCAUGUGAUUUUAAUAGCUUCUUAGGAGAAUGACAAAAAAAAAAAAAAAAAAAAAAAAAAAAAAAAA	UAACUGGUUGAACAACUGAACC
NC_045512.2	59	64	59	64	1.96	hsa-miR-103a-2-5p_MIMAT0009196	18	23	18	23	0.15	-5.35	-7.46	-0.624328	CGAGGC&GCCUUG	((((((&))))))	CAAUCUUUAAUCAGUGUGUAACAUUAGGGAGGACUUGAAAGAGCCACCACAUUUUCACCGAGGCCACGCGGAGUACGAUCGAGUGUACAGUGAACAAUGCUAGGGAGAGCUGCCUAUAUGGAAGAGCCCUAAUGUGUAAAAUUAAUUUUAGUAGUGCUAUCCCCAUGUGAUUUUAAUAGCUUCUUAGGAGAAUGACAAAAAAAAAAAAAAAAAAAAAAAAAAAAAAAAA	AGCUUCUUUACAGUGCUGCCUUG
NC_045512.2	179	184	179	184	1.04	hsa-miR-3126-5p_MIMAT0014989	16	21	16	21	0.17	-5.35	-6.56	-0.627583	GCUUCU&AGAAGC	((((((&))))))	CAAUCUUUAAUCAGUGUGUAACAUUAGGGAGGACUUGAAAGAGCCACCACAUUUUCACCGAGGCCACGCGGAGUACGAUCGAGUGUACAGUGAACAAUGCUAGGGAGAGCUGCCUAUAUGGAAGAGCCCUAAUGUGUAAAAUUAAUUUUAGUAGUGCUAUCCCCAUGUGAUUUUAAUAGCUUCUUAGGAGAAUGACAAAAAAAAAAAAAAAAAAAAAAAAAAAAAAAAA	UGAGGGACAGAUGCCAGAAGCA
NC_045512.2	7	17	7	12	2.24	hsa-miR-369-3p_MIMAT0000721	5	16	11	16	0.2	-5.33	-7.77	-0.628668	UUAAUCAGUGU&AUACAUGGUUGA	(((((((((((&)))).)))))))	CAAUCUUUAAUCAGUGUGUAACAUUAGGGAGGACUUGAAAGAGCCACCACAUUUUCACCGAGGCCACGCGGAGUACGAUCGAGUGUACAGUGAACAAUGCUAGGGAGAGCUGCCUAUAUGGAAGAGCCCUAAUGUGUAAAAUUAAUUUUAGUAGUGCUAUCCCCAUGUGAUUUUAAUAGCUUCUUAGGAGAAUGACAAAAAAAAAAAAAAAAAAAAAAAAAAAAAAAAA	AAUAAUACAUGGUUGAUCUUU
NC_045512.2	83	90	83	88	2.81	hsa-miR-675-3p_MIMAT0006790	1	8	3	8	0.4	-5.32	-8.53	-0.63112	GUGUACAG&CUGUAUGC	((((((((&))))))))	CAAUCUUUAAUCAGUGUGUAACAUUAGGGAGGACUUGAAAGAGCCACCACAUUUUCACCGAGGCCACGCGGAGUACGAUCGAGUGUACAGUGAACAAUGCUAGGGAGAGCUGCCUAUAUGGAAGAGCCCUAAUGUGUAAAAUUAAUUUUAGUAGUGCUAUCCCCAUGUGAUUUUAAUAGCUUCUUAGGAGAAUGACAAAAAAAAAAAAAAAAAAAAAAAAAAAAAAAAA	CUGUAUGCCCUCACCGCUCA
NC_045512.2	26	33	27	32	3.93	hsa-miR-892c-3p_MIMAT0025858	8	15	9	14	0.14	-5.32	-9.39	-0.624064	AGGGAGGA&UCCUUUCU	((((((((&))))))))	CAAUCUUUAAUCAGUGUGUAACAUUAGGGAGGACUUGAAAGAGCCACCACAUUUUCACCGAGGCCACGCGGAGUACGAUCGAGUGUACAGUGAACAAUGCUAGGGAGAGCUGCCUAUAUGGAAGAGCCCUAAUGUGUAAAAUUAAUUUUAGUAGUGCUAUCCCCAUGUGAUUUUAAUAGCUUCUUAGGAGAAUGACAAAAAAAAAAAAAAAAAAAAAAAAAAAAAAAAA	CACUGUUUCCUUUCUGAGUGGA
NC_045512.2	11	28	22	27	4.28	hsa-miR-338-5p_MIMAT0004701	9	19	10	15	0.31	-5.31	-9.9	-0.622891	UCAGUGUGUAACAUUAGG&CCUGGUGCUGA	((((.......(((((((&)))))))))))	CAAUCUUUAAUCAGUGUGUAACAUUAGGGAGGACUUGAAAGAGCCACCACAUUUUCACCGAGGCCACGCGGAGUACGAUCGAGUGUACAGUGAACAAUGCUAGGGAGAGCUGCCUAUAUGGAAGAGCCCUAAUGUGUAAAAUUAAUUUUAGUAGUGCUAUCCCCAUGUGAUUUUAAUAGCUUCUUAGGAGAAUGACAAAAAAAAAAAAAAAAAAAAAAAAAAAAAAAAA	AACAAUAUCCUGGUGCUGAGUG
NC_045512.2	112	130	112	117	6.07	hsa-miR-1249-5p_MIMAT0032029	4	18	13	18	1.05	-5.3	-12.42	-0.615436	GCCUAUAUGGAAGAGCCCU&AGGGAGGAGAUGGGC	((((((.........((((&)))).....))))))	CAAUCUUUAAUCAGUGUGUAACAUUAGGGAGGACUUGAAAGAGCCACCACAUUUUCACCGAGGCCACGCGGAGUACGAUCGAGUGUACAGUGAACAAUGCUAGGGAGAGCUGCCUAUAUGGAAGAGCCCUAAUGUGUAAAAUUAAUUUUAGUAGUGCUAUCCCCAUGUGAUUUUAAUAGCUUCUUAGGAGAAUGACAAAAAAAAAAAAAAAAAAAAAAAAAAAAAAAAA	AGGAGGGAGGAGAUGGGCCAAGUU
NC_045512.2	66	71	66	71	2.81	hsa-miR-369-5p_MIMAT0001621	8	13	8	13	0.42	-5.3	-8.53	-0.621718	ACGCGG&CCGUGU	((((((&))))))	CAAUCUUUAAUCAGUGUGUAACAUUAGGGAGGACUUGAAAGAGCCACCACAUUUUCACCGAGGCCACGCGGAGUACGAUCGAGUGUACAGUGAACAAUGCUAGGGAGAGCUGCCUAUAUGGAAGAGCCCUAAUGUGUAAAAUUAAUUUUAGUAGUGCUAUCCCCAUGUGAUUUUAAUAGCUUCUUAGGAGAAUGACAAAAAAAAAAAAAAAAAAAAAAAAAAAAAAAAA	AGAUCGACCGUGUUAUAUUCGC
NC_045512.2	157	162	157	162	2.61	hsa-miR-26b-5p_MIMAT0000083	14	19	14	19	0.13	-5.29	-8.03	-0.62395	CUAUCC&GGAUAG	((((((&))))))	CAAUCUUUAAUCAGUGUGUAACAUUAGGGAGGACUUGAAAGAGCCACCACAUUUUCACCGAGGCCACGCGGAGUACGAUCGAGUGUACAGUGAACAAUGCUAGGGAGAGCUGCCUAUAUGGAAGAGCCCUAAUGUGUAAAAUUAAUUUUAGUAGUGCUAUCCCCAUGUGAUUUUAAUAGCUUCUUAGGAGAAUGACAAAAAAAAAAAAAAAAAAAAAAAAAAAAAAAAA	UUCAAGUAAUUCAGGAUAGGU
NC_045512.2	20	33	28	33	4.74	hsa-miR-29c-5p_MIMAT0004673	9	21	9	14	2.75	-5.29	-12.78	-0.620545	AACAUUAGGGAGGA&UUCUCCUGGUGUU	(((((((.((((((&)))))))))))))	CAAUCUUUAAUCAGUGUGUAACAUUAGGGAGGACUUGAAAGAGCCACCACAUUUUCACCGAGGCCACGCGGAGUACGAUCGAGUGUACAGUGAACAAUGCUAGGGAGAGCUGCCUAUAUGGAAGAGCCCUAAUGUGUAAAAUUAAUUUUAGUAGUGCUAUCCCCAUGUGAUUUUAAUAGCUUCUUAGGAGAAUGACAAAAAAAAAAAAAAAAAAAAAAAAAAAAAAAAA	UGACCGAUUUCUCCUGGUGUUC
NC_045512.2	191	200	195	200	0.62	hsa-miR-7-5p_MIMAT0000252	15	24	15	20	0.45	-5.29	-6.36	-0.614275	AAUGACAAAA&UUUUGUUGUU	((((((((((&))))))))))	CAAUCUUUAAUCAGUGUGUAACAUUAGGGAGGACUUGAAAGAGCCACCACAUUUUCACCGAGGCCACGCGGAGUACGAUCGAGUGUACAGUGAACAAUGCUAGGGAGAGCUGCCUAUAUGGAAGAGCCCUAAUGUGUAAAAUUAAUUUUAGUAGUGCUAUCCCCAUGUGAUUUUAAUAGCUUCUUAGGAGAAUGACAAAAAAAAAAAAAAAAAAAAAAAAAAAAAAAAA	UGGAAGACUAGUGAUUUUGUUGUU
NC_045512.2	34	48	40	45	3.77	hsa-miR-193b-5p_MIMAT0004767	2	18	4	9	2.13	-5.28	-11.18	-0.619372	CUUGAAAGAGCCACC&GGGGUUUUGAGGGCGAG	((((..((((((.((&)))))))).....))))	CAAUCUUUAAUCAGUGUGUAACAUUAGGGAGGACUUGAAAGAGCCACCACAUUUUCACCGAGGCCACGCGGAGUACGAUCGAGUGUACAGUGAACAAUGCUAGGGAGAGCUGCCUAUAUGGAAGAGCCCUAAUGUGUAAAAUUAAUUUUAGUAGUGCUAUCCCCAUGUGAUUUUAAUAGCUUCUUAGGAGAAUGACAAAAAAAAAAAAAAAAAAAAAAAAAAAAAAAAA	CGGGGUUUUGAGGGCGAGAUGA
NC_045512.2	130	139	133	138	2.31	hsa-miR-32-5p_MIMAT0000090	3	12	4	9	2.74	-5.28	-10.33	-0.619372	UAAUGUGUAA&UUGCACAUUA	((((((((((&))))))))))	CAAUCUUUAAUCAGUGUGUAACAUUAGGGAGGACUUGAAAGAGCCACCACAUUUUCACCGAGGCCACGCGGAGUACGAUCGAGUGUACAGUGAACAAUGCUAGGGAGAGCUGCCUAUAUGGAAGAGCCCUAAUGUGUAAAAUUAAUUUUAGUAGUGCUAUCCCCAUGUGAUUUUAAUAGCUUCUUAGGAGAAUGACAAAAAAAAAAAAAAAAAAAAAAAAAAAAAAAAA	UAUUGCACAUUACUAAGUUGCA
NC_045512.2	149	157	150	155	2.36	hsa-miR-449c-5p_MIMAT0010251	9	17	11	16	1.08	-5.25	-8.69	-0.606754	UAGUAGUGC&GUAUUGCUA	(((((((((&)))))))))	CAAUCUUUAAUCAGUGUGUAACAUUAGGGAGGACUUGAAAGAGCCACCACAUUUUCACCGAGGCCACGCGGAGUACGAUCGAGUGUACAGUGAACAAUGCUAGGGAGAGCUGCCUAUAUGGAAGAGCCCUAAUGUGUAAAAUUAAUUUUAGUAGUGCUAUCCCCAUGUGAUUUUAAUAGCUUCUUAGGAGAAUGACAAAAAAAAAAAAAAAAAAAAAAAAAAAAAAAAA	UAGGCAGUGUAUUGCUAGCGGCUGU
NC_045512.2	185	197	186	191	3.83	hsa-miR-6733-3p_MIMAT0027368	5	19	13	18	1.66	-5.25	-10.74	-0.622816	UAGGAGAAUGACA&UGUCUGGAUUUCCUA	(((((((..((((&))))....)))))))	CAAUCUUUAAUCAGUGUGUAACAUUAGGGAGGACUUGAAAGAGCCACCACAUUUUCACCGAGGCCACGCGGAGUACGAUCGAGUGUACAGUGAACAAUGCUAGGGAGAGCUGCCUAUAUGGAAGAGCCCUAAUGUGUAAAAUUAAUUUUAGUAGUGCUAUCCCCAUGUGAUUUUAAUAGCUUCUUAGGAGAAUGACAAAAAAAAAAAAAAAAAAAAAAAAAAAAAAAAA	UCAGUGUCUGGAUUUCCUAG
NC_045512.2	64	92	87	92	7.46	hsa-miR-892c-3p_MIMAT0025858	1	21	1	6	2.67	-5.25	-15.38	-0.615853	CCACGCGGAGUACGAUCGAGUGUACAGUG&CACUGUUUCCUUUCUGAGUGG	((((.((((.........((...((((((&))))))...)).)))).))))	CAAUCUUUAAUCAGUGUGUAACAUUAGGGAGGACUUGAAAGAGCCACCACAUUUUCACCGAGGCCACGCGGAGUACGAUCGAGUGUACAGUGAACAAUGCUAGGGAGAGCUGCCUAUAUGGAAGAGCCCUAAUGUGUAAAAUUAAUUUUAGUAGUGCUAUCCCCAUGUGAUUUUAAUAGCUUCUUAGGAGAAUGACAAAAAAAAAAAAAAAAAAAAAAAAAAAAAAAAA	CACUGUUUCCUUUCUGAGUGGA
NC_045512.2	55	64	59	64	3.84	hsa-miR-339-3p_MIMAT0004702	6	15	6	11	2.66	-5.24	-11.74	-0.611491	UCACCGAGGC&GCCUCGACGA	((..((((((&))))))..))	CAAUCUUUAAUCAGUGUGUAACAUUAGGGAGGACUUGAAAGAGCCACCACAUUUUCACCGAGGCCACGCGGAGUACGAUCGAGUGUACAGUGAACAAUGCUAGGGAGAGCUGCCUAUAUGGAAGAGCCCUAAUGUGUAAAAUUAAUUUUAGUAGUGCUAUCCCCAUGUGAUUUUAAUAGCUUCUUAGGAGAAUGACAAAAAAAAAAAAAAAAAAAAAAAAAAAAAAAAA	UGAGCGCCUCGACGACAGAGCCG
NC_045512.2	64	73	67	72	4.05	hsa-miR-514b-3p_MIMAT0015088	9	20	10	15	2.76	-5.24	-12.05	-0.618052	CCACGCGGAG&CUCUGUGAGUGG	((((((((((&)))))))..)))	CAAUCUUUAAUCAGUGUGUAACAUUAGGGAGGACUUGAAAGAGCCACCACAUUUUCACCGAGGCCACGCGGAGUACGAUCGAGUGUACAGUGAACAAUGCUAGGGAGAGCUGCCUAUAUGGAAGAGCCCUAAUGUGUAAAAUUAAUUUUAGUAGUGCUAUCCCCAUGUGAUUUUAAUAGCUUCUUAGGAGAAUGACAAAAAAAAAAAAAAAAAAAAAAAAAAAAAAAAA	AUUGACACCUCUGUGAGUGGA
NC_045512.2	26	33	26	31	3.93	hsa-miR-5187-3p_MIMAT0021118	7	14	9	14	0.06	-5.24	-9.23	-0.618052	AGGGAGGA&UCCUCUUU	((((((((&))))))))	CAAUCUUUAAUCAGUGUGUAACAUUAGGGAGGACUUGAAAGAGCCACCACAUUUUCACCGAGGCCACGCGGAGUACGAUCGAGUGUACAGUGAACAAUGCUAGGGAGAGCUGCCUAUAUGGAAGAGCCCUAAUGUGUAAAAUUAAUUUUAGUAGUGCUAUCCCCAUGUGAUUUUAAUAGCUUCUUAGGAGAAUGACAAAAAAAAAAAAAAAAAAAAAAAAAAAAAAAAA	ACUGAAUCCUCUUUUCCUCAG
NC_045512.2	61	67	61	66	1.98	hsa-miR-548d-5p_MIMAT0004812	11	17	12	17	0.83	-5.2	-8.01	-0.609988	AGGCCAC&GUGGUUU	(((((((&)))))))	CAAUCUUUAAUCAGUGUGUAACAUUAGGGAGGACUUGAAAGAGCCACCACAUUUUCACCGAGGCCACGCGGAGUACGAUCGAGUGUACAGUGAACAAUGCUAGGGAGAGCUGCCUAUAUGGAAGAGCCCUAAUGUGUAAAAUUAAUUUUAGUAGUGCUAUCCCCAUGUGAUUUUAAUAGCUUCUUAGGAGAAUGACAAAAAAAAAAAAAAAAAAAAAAAAAAAAAAAAA	AAAAGUAAUUGUGGUUUUUGCC
NC_045512.2	24	29	24	29	2.99	hsa-miR-18b-3p_MIMAT0004751	3	8	3	8	0.11	-5.19	-8.29	-0.608814	UUAGGG&CCCUAA	((((((&))))))	CAAUCUUUAAUCAGUGUGUAACAUUAGGGAGGACUUGAAAGAGCCACCACAUUUUCACCGAGGCCACGCGGAGUACGAUCGAGUGUACAGUGAACAAUGCUAGGGAGAGCUGCCUAUAUGGAAGAGCCCUAAUGUGUAAAAUUAAUUUUAGUAGUGCUAUCCCCAUGUGAUUUUAAUAGCUUCUUAGGAGAAUGACAAAAAAAAAAAAAAAAAAAAAAAAAAAAAAAAA	UGCCCUAAAUGCCCCUUCUGGC
NC_045512.2	55	70	65	70	5.67	hsa-miR-210-3p_MIMAT0000267	6	22	6	11	3.45	-5.19	-14.31	-0.608814	UCACCGAGGCCACGCG&CGUGUGACAGCGGCUGA	((((((....((((((&))))))....))).)))	CAAUCUUUAAUCAGUGUGUAACAUUAGGGAGGACUUGAAAGAGCCACCACAUUUUCACCGAGGCCACGCGGAGUACGAUCGAGUGUACAGUGAACAAUGCUAGGGAGAGCUGCCUAUAUGGAAGAGCCCUAAUGUGUAAAAUUAAUUUUAGUAGUGCUAUCCCCAUGUGAUUUUAAUAGCUUCUUAGGAGAAUGACAAAAAAAAAAAAAAAAAAAAAAAAAAAAAAAAA	CUGUGCGUGUGACAGCGGCUGA
NC_045512.2	56	62	57	62	3.38	hsa-miR-3614-3p_MIMAT0017993	13	19	13	18	1.62	-5.18	-10.18	-0.604489	CACCGAG&CUUGGUG	(((((((&)))))))	CAAUCUUUAAUCAGUGUGUAACAUUAGGGAGGACUUGAAAGAGCCACCACAUUUUCACCGAGGCCACGCGGAGUACGAUCGAGUGUACAGUGAACAAUGCUAGGGAGAGCUGCCUAUAUGGAAGAGCCCUAAUGUGUAAAAUUAAUUUUAGUAGUGCUAUCCCCAUGUGAUUUUAAUAGCUUCUUAGGAGAAUGACAAAAAAAAAAAAAAAAAAAAAAAAAAAAAAAAA	UAGCCUUCAGAUCUUGGUGUUUU
NC_045512.2	81	94	89	94	3.3	hsa-miR-664b-3p_MIMAT0022272	1	12	1	6	0.38	-5.18	-8.86	-0.607641	GAGUGUACAGUGAA&UUCAUUUGCCUC	(((.(((.((((((&))))))))))))	CAAUCUUUAAUCAGUGUGUAACAUUAGGGAGGACUUGAAAGAGCCACCACAUUUUCACCGAGGCCACGCGGAGUACGAUCGAGUGUACAGUGAACAAUGCUAGGGAGAGCUGCCUAUAUGGAAGAGCCCUAAUGUGUAAAAUUAAUUUUAGUAGUGCUAUCCCCAUGUGAUUUUAAUAGCUUCUUAGGAGAAUGACAAAAAAAAAAAAAAAAAAAAAAAAAAAAAAAAA	UUCAUUUGCCUCCCAGCCUACA
NC_045512.2	3	17	12	17	2.55	hsa-miR-200a-3p_MIMAT0000682	3	20	3	8	1.34	-5.17	-9.06	-0.606468	AUCUUUAAUCAGUGU&ACACUGUCUGGUAACGAU	(((.(((..((((((&)))))).....))).)))	CAAUCUUUAAUCAGUGUGUAACAUUAGGGAGGACUUGAAAGAGCCACCACAUUUUCACCGAGGCCACGCGGAGUACGAUCGAGUGUACAGUGAACAAUGCUAGGGAGAGCUGCCUAUAUGGAAGAGCCCUAAUGUGUAAAAUUAAUUUUAGUAGUGCUAUCCCCAUGUGAUUUUAAUAGCUUCUUAGGAGAAUGACAAAAAAAAAAAAAAAAAAAAAAAAAAAAAAAAA	UAACACUGUCUGGUAACGAUGU
NC_045512.2	125	130	125	130	2.41	hsa-miR-5001-5p_MIMAT0021021	1	6	1	6	3.18	-5.16	-10.75	-0.59918	AGCCCU&AGGGCU	((((((&))))))	CAAUCUUUAAUCAGUGUGUAACAUUAGGGAGGACUUGAAAGAGCCACCACAUUUUCACCGAGGCCACGCGGAGUACGAUCGAGUGUACAGUGAACAAUGCUAGGGAGAGCUGCCUAUAUGGAAGAGCCCUAAUGUGUAAAAUUAAUUUUAGUAGUGCUAUCCCCAUGUGAUUUUAAUAGCUUCUUAGGAGAAUGACAAAAAAAAAAAAAAAAAAAAAAAAAAAAAAAAA	AGGGCUGGACUCAGCGGCGGAGCU
NC_045512.2	151	156	151	156	2.05	hsa-miR-6509-3p_MIMAT0025475	4	9	4	9	0	-5.16	-7.21	-0.605295	GUAGUG&CACUGC	((((((&))))))	CAAUCUUUAAUCAGUGUGUAACAUUAGGGAGGACUUGAAAGAGCCACCACAUUUUCACCGAGGCCACGCGGAGUACGAUCGAGUGUACAGUGAACAAUGCUAGGGAGAGCUGCCUAUAUGGAAGAGCCCUAAUGUGUAAAAUUAAUUUUAGUAGUGCUAUCCCCAUGUGAUUUUAAUAGCUUCUUAGGAGAAUGACAAAAAAAAAAAAAAAAAAAAAAAAAAAAAAAAA	UUCCACUGCCACUACCUAAUUU
NC_045512.2	151	158	153	158	2.37	hsa-miR-103a-2-5p_MIMAT0009196	12	19	12	17	1.8	-5.15	-9.32	-0.600988	GUAGUGCU&AGUGCUGC	((((((((&))))))))	CAAUCUUUAAUCAGUGUGUAACAUUAGGGAGGACUUGAAAGAGCCACCACAUUUUCACCGAGGCCACGCGGAGUACGAUCGAGUGUACAGUGAACAAUGCUAGGGAGAGCUGCCUAUAUGGAAGAGCCCUAAUGUGUAAAAUUAAUUUUAGUAGUGCUAUCCCCAUGUGAUUUUAAUAGCUUCUUAGGAGAAUGACAAAAAAAAAAAAAAAAAAAAAAAAAAAAAAAAA	AGCUUCUUUACAGUGCUGCCUUG
NC_045512.2	12	18	13	18	1.71	hsa-miR-106b-3p_MIMAT0004672	2	8	2	7	2.89	-5.13	-9.73	-0.601776	CAGUGUG&CGCACUG	(((((((&)))))))	CAAUCUUUAAUCAGUGUGUAACAUUAGGGAGGACUUGAAAGAGCCACCACAUUUUCACCGAGGCCACGCGGAGUACGAUCGAGUGUACAGUGAACAAUGCUAGGGAGAGCUGCCUAUAUGGAAGAGCCCUAAUGUGUAAAAUUAAUUUUAGUAGUGCUAUCCCCAUGUGAUUUUAAUAGCUUCUUAGGAGAAUGACAAAAAAAAAAAAAAAAAAAAAAAAAAAAAAAAA	CCGCACUGUGGGUACUUGCUGC
NC_045512.2	180	189	182	187	3.79	hsa-miR-513a-3p_MIMAT0004777	13	22	15	20	2.98	-5.13	-11.9	-0.598655	CUUCUUAGGA&UUCUGAGAAG	((((((((((&))))))))))	CAAUCUUUAAUCAGUGUGUAACAUUAGGGAGGACUUGAAAGAGCCACCACAUUUUCACCGAGGCCACGCGGAGUACGAUCGAGUGUACAGUGAACAAUGCUAGGGAGAGCUGCCUAUAUGGAAGAGCCCUAAUGUGUAAAAUUAAUUUUAGUAGUGCUAUCCCCAUGUGAUUUUAAUAGCUUCUUAGGAGAAUGACAAAAAAAAAAAAAAAAAAAAAAAAAAAAAAAAA	UAAAUUUCACCUUUCUGAGAAGG
NC_045512.2	88	94	88	93	2.44	hsa-miR-653-3p_MIMAT0026625	1	7	2	7	0.93	-5.13	-8.5	-0.601776	CAGUGAA&UUCACUG	(((((((&)))))))	CAAUCUUUAAUCAGUGUGUAACAUUAGGGAGGACUUGAAAGAGCCACCACAUUUUCACCGAGGCCACGCGGAGUACGAUCGAGUGUACAGUGAACAAUGCUAGGGAGAGCUGCCUAUAUGGAAGAGCCCUAAUGUGUAAAAUUAAUUUUAGUAGUGCUAUCCCCAUGUGAUUUUAAUAGCUUCUUAGGAGAAUGACAAAAAAAAAAAAAAAAAAAAAAAAAAAAAAAAA	UUCACUGGAGUUUGUUUCAAUA
NC_045512.2	41	47	42	47	1.44	hsa-miR-1287-5p_MIMAT0005878	11	17	11	16	4.24	-5.12	-10.8	-0.600603	GAGCCAC&GUGGUUC	(((((((&)))))))	CAAUCUUUAAUCAGUGUGUAACAUUAGGGAGGACUUGAAAGAGCCACCACAUUUUCACCGAGGCCACGCGGAGUACGAUCGAGUGUACAGUGAACAAUGCUAGGGAGAGCUGCCUAUAUGGAAGAGCCCUAAUGUGUAAAAUUAAUUUUAGUAGUGCUAUCCCCAUGUGAUUUUAAUAGCUUCUUAGGAGAAUGACAAAAAAAAAAAAAAAAAAAAAAAAAAAAAAAAA	UGCUGGAUCAGUGGUUCGAGUC
NC_045512.2	179	192	187	192	4.96	hsa-miR-629-3p_MIMAT0003298	2	17	2	7	0.31	-5.12	-10.39	-0.600603	GCUUCUUAGGAGAA&UUCUCCCAACGUAAGC	((((.((.((((((&)))))).))...))))	CAAUCUUUAAUCAGUGUGUAACAUUAGGGAGGACUUGAAAGAGCCACCACAUUUUCACCGAGGCCACGCGGAGUACGAUCGAGUGUACAGUGAACAAUGCUAGGGAGAGCUGCCUAUAUGGAAGAGCCCUAAUGUGUAAAAUUAAUUUUAGUAGUGCUAUCCCCAUGUGAUUUUAAUAGCUUCUUAGGAGAAUGACAAAAAAAAAAAAAAAAAAAAAAAAAAAAAAAAA	GUUCUCCCAACGUAAGCCCAGC
NC_045512.2	190	196	191	196	0.57	hsa-miR-582-5p_MIMAT0003247	6	12	6	11	0.33	-5.1	-6	-0.595154	GAAUGAC&GUUGUUC	(((((((&)))))))	CAAUCUUUAAUCAGUGUGUAACAUUAGGGAGGACUUGAAAGAGCCACCACAUUUUCACCGAGGCCACGCGGAGUACGAUCGAGUGUACAGUGAACAAUGCUAGGGAGAGCUGCCUAUAUGGAAGAGCCCUAAUGUGUAAAAUUAAUUUUAGUAGUGCUAUCCCCAUGUGAUUUUAAUAGCUUCUUAGGAGAAUGACAAAAAAAAAAAAAAAAAAAAAAAAAAAAAAAAA	UUACAGUUGUUCAACCAGUUACU
NC_045512.2	123	128	123	128	2.61	hsa-miR-212-5p_MIMAT0022695	6	11	6	11	2.17	-5.09	-9.87	-0.593987	AGAGCC&GGCUCU	((((((&))))))	CAAUCUUUAAUCAGUGUGUAACAUUAGGGAGGACUUGAAAGAGCCACCACAUUUUCACCGAGGCCACGCGGAGUACGAUCGAGUGUACAGUGAACAAUGCUAGGGAGAGCUGCCUAUAUGGAAGAGCCCUAAUGUGUAAAAUUAAUUUUAGUAGUGCUAUCCCCAUGUGAUUUUAAUAGCUUCUUAGGAGAAUGACAAAAAAAAAAAAAAAAAAAAAAAAAAAAAAAAA	ACCUUGGCUCUAGACUGCUUACU
NC_045512.2	26	33	27	32	3.93	hsa-miR-942-5p_MIMAT0004985	1	8	2	7	0.17	-5.09	-9.19	-0.597084	AGGGAGGA&UCUUCUCU	((((((((&))))))))	CAAUCUUUAAUCAGUGUGUAACAUUAGGGAGGACUUGAAAGAGCCACCACAUUUUCACCGAGGCCACGCGGAGUACGAUCGAGUGUACAGUGAACAAUGCUAGGGAGAGCUGCCUAUAUGGAAGAGCCCUAAUGUGUAAAAUUAAUUUUAGUAGUGCUAUCCCCAUGUGAUUUUAAUAGCUUCUUAGGAGAAUGACAAAAAAAAAAAAAAAAAAAAAAAAAAAAAAAAA	UCUUCUCUGUUUUGGCCAUGUG
NC_045512.2	110	115	110	115	2.5	hsa-miR-214-3p_MIMAT0000271	16	21	16	21	1.94	-5.08	-9.52	-0.595911	CUGCCU&AGGCAG	((((((&))))))	CAAUCUUUAAUCAGUGUGUAACAUUAGGGAGGACUUGAAAGAGCCACCACAUUUUCACCGAGGCCACGCGGAGUACGAUCGAGUGUACAGUGAACAAUGCUAGGGAGAGCUGCCUAUAUGGAAGAGCCCUAAUGUGUAAAAUUAAUUUUAGUAGUGCUAUCCCCAUGUGAUUUUAAUAGCUUCUUAGGAGAAUGACAAAAAAAAAAAAAAAAAAAAAAAAAAAAAAAAA	ACAGCAGGCACAGACAGGCAGU
NC_045512.2	160	174	167	172	3.71	hsa-miR-3065-5p_MIMAT0015066	6	23	8	13	0.81	-5.08	-9.6	-0.59282	UCCCCAUGUGAUUUU&AAAAUCACUGAUGCUGGA	(((.(((((((((((&))))))))..)))..)))	CAAUCUUUAAUCAGUGUGUAACAUUAGGGAGGACUUGAAAGAGCCACCACAUUUUCACCGAGGCCACGCGGAGUACGAUCGAGUGUACAGUGAACAAUGCUAGGGAGAGCUGCCUAUAUGGAAGAGCCCUAAUGUGUAAAAUUAAUUUUAGUAGUGCUAUCCCCAUGUGAUUUUAAUAGCUUCUUAGGAGAAUGACAAAAAAAAAAAAAAAAAAAAAAAAAAAAAAAAA	UCAACAAAAUCACUGAUGCUGGA
NC_045512.2	190	195	190	195	0.54	hsa-miR-382-3p_MIMAT0022697	3	8	3	8	0.04	-5.08	-5.66	-0.599181	GAAUGA&UCAUUC	((((((&))))))	CAAUCUUUAAUCAGUGUGUAACAUUAGGGAGGACUUGAAAGAGCCACCACAUUUUCACCGAGGCCACGCGGAGUACGAUCGAGUGUACAGUGAACAAUGCUAGGGAGAGCUGCCUAUAUGGAAGAGCCCUAAUGUGUAAAAUUAAUUUUAGUAGUGCUAUCCCCAUGUGAUUUUAAUAGCUUCUUAGGAGAAUGACAAAAAAAAAAAAAAAAAAAAAAAAAAAAAAAAA	AAUCAUUCACGGACAACACUU
NC_045512.2	121	137	132	137	3.78	hsa-miR-369-3p_MIMAT0000721	5	18	5	10	0.2	-5.08	-9.06	-0.599181	GAAGAGCCCUAAUGUGU&AUACAUGGUUGAUC	((..((((...((((((&))))))))))..))	CAAUCUUUAAUCAGUGUGUAACAUUAGGGAGGACUUGAAAGAGCCACCACAUUUUCACCGAGGCCACGCGGAGUACGAUCGAGUGUACAGUGAACAAUGCUAGGGAGAGCUGCCUAUAUGGAAGAGCCCUAAUGUGUAAAAUUAAUUUUAGUAGUGCUAUCCCCAUGUGAUUUUAAUAGCUUCUUAGGAGAAUGACAAAAAAAAAAAAAAAAAAAAAAAAAAAAAAAAA	AAUAAUACAUGGUUGAUCUUU
NC_045512.2	145	159	154	159	2.67	hsa-miR-29c-3p_MIMAT0000681	1	16	1	6	1.18	-5.07	-8.92	-0.594738	AUUUUAGUAGUGCUA&UAGCACCAUUUGAAAU	((((((...((((((&))))))....))))))	CAAUCUUUAAUCAGUGUGUAACAUUAGGGAGGACUUGAAAGAGCCACCACAUUUUCACCGAGGCCACGCGGAGUACGAUCGAGUGUACAGUGAACAAUGCUAGGGAGAGCUGCCUAUAUGGAAGAGCCCUAAUGUGUAAAAUUAAUUUUAGUAGUGCUAUCCCCAUGUGAUUUUAAUAGCUUCUUAGGAGAAUGACAAAAAAAAAAAAAAAAAAAAAAAAAAAAAAAAA	UAGCACCAUUUGAAAUCGGUUA
NC_045512.2	102	108	103	108	3.81	hsa-miR-4755-5p_MIMAT0019895	1	7	1	6	0.01	-5.07	-8.89	-0.594738	AGGGAGA&UUUCCCU	(((((((&)))))))	CAAUCUUUAAUCAGUGUGUAACAUUAGGGAGGACUUGAAAGAGCCACCACAUUUUCACCGAGGCCACGCGGAGUACGAUCGAGUGUACAGUGAACAAUGCUAGGGAGAGCUGCCUAUAUGGAAGAGCCCUAAUGUGUAAAAUUAAUUUUAGUAGUGCUAUCCCCAUGUGAUUUUAAUAGCUUCUUAGGAGAAUGACAAAAAAAAAAAAAAAAAAAAAAAAAAAAAAAAA	UUUCCCUUCAGAGCCUGGCUUU
NC_045512.2	68	80	68	73	3.42	hsa-miR-561-5p_MIMAT0022706	7	21	16	21	1.89	-5.07	-10.38	-0.594738	GCGGAGUACGAUC&GAUCUUAAACUUUGC	(((((((..((((&))))....)))))))	CAAUCUUUAAUCAGUGUGUAACAUUAGGGAGGACUUGAAAGAGCCACCACAUUUUCACCGAGGCCACGCGGAGUACGAUCGAGUGUACAGUGAACAAUGCUAGGGAGAGCUGCCUAUAUGGAAGAGCCCUAAUGUGUAAAAUUAAUUUUAGUAGUGCUAUCCCCAUGUGAUUUUAAUAGCUUCUUAGGAGAAUGACAAAAAAAAAAAAAAAAAAAAAAAAAAAAAAAAA	AUCAAGGAUCUUAAACUUUGCC
NC_045512.2	97	115	97	102	6.8	hsa-miR-31-5p_MIMAT0000089	1	17	12	17	2.86	-5.06	-14.72	-0.596822	AUGCUAGGGAGAGCUGCCU&AGGCAAGAUGCUGGCAU	(((((((......((((((&)))).))...)))))))	CAAUCUUUAAUCAGUGUGUAACAUUAGGGAGGACUUGAAAGAGCCACCACAUUUUCACCGAGGCCACGCGGAGUACGAUCGAGUGUACAGUGAACAAUGCUAGGGAGAGCUGCCUAUAUGGAAGAGCCCUAAUGUGUAAAAUUAAUUUUAGUAGUGCUAUCCCCAUGUGAUUUUAAUAGCUUCUUAGGAGAAUGACAAAAAAAAAAAAAAAAAAAAAAAAAAAAAAAAA	AGGCAAGAUGCUGGCAUAGCU
NC_045512.2	180	192	186	191	4.96	hsa-miR-518f-3p_MIMAT0002842	9	21	10	15	2.32	-5.05	-12.33	-0.595642	CUUCUUAGGAGAA&UUCUCUUUAGAGG	(((((.(((((((&))))))).)))))	CAAUCUUUAAUCAGUGUGUAACAUUAGGGAGGACUUGAAAGAGCCACCACAUUUUCACCGAGGCCACGCGGAGUACGAUCGAGUGUACAGUGAACAAUGCUAGGGAGAGCUGCCUAUAUGGAAGAGCCCUAAUGUGUAAAAUUAAUUUUAGUAGUGCUAUCCCCAUGUGAUUUUAAUAGCUUCUUAGGAGAAUGACAAAAAAAAAAAAAAAAAAAAAAAAAAAAAAAAA	GAAAGCGCUUCUCUUUAGAGG
NC_045512.2	88	96	90	95	2.56	hsa-miR-30d-3p_MIMAT0004551	13	21	14	19	2.3	-5.04	-9.9	-0.591219	CAGUGAACA&UGUUUGCUG	(((((((((&)))))))))	CAAUCUUUAAUCAGUGUGUAACAUUAGGGAGGACUUGAAAGAGCCACCACAUUUUCACCGAGGCCACGCGGAGUACGAUCGAGUGUACAGUGAACAAUGCUAGGGAGAGCUGCCUAUAUGGAAGAGCCCUAAUGUGUAAAAUUAAUUUUAGUAGUGCUAUCCCCAUGUGAUUUUAAUAGCUUCUUAGGAGAAUGACAAAAAAAAAAAAAAAAAAAAAAAAAAAAAAAAA	CUUUCAGUCAGAUGUUUGCUGC
NC_045512.2	148	154	149	154	1.8	hsa-miR-374b-5p_MIMAT0004955	13	19	13	18	0.16	-5.04	-7	-0.591219	UUAGUAG&CUGCUAA	(((((((&)))))))	CAAUCUUUAAUCAGUGUGUAACAUUAGGGAGGACUUGAAAGAGCCACCACAUUUUCACCGAGGCCACGCGGAGUACGAUCGAGUGUACAGUGAACAAUGCUAGGGAGAGCUGCCUAUAUGGAAGAGCCCUAAUGUGUAAAAUUAAUUUUAGUAGUGCUAUCCCCAUGUGAUUUUAAUAGCUUCUUAGGAGAAUGACAAAAAAAAAAAAAAAAAAAAAAAAAAAAAAAAA	AUAUAAUACAACCUGCUAAGUG
NC_045512.2	100	105	100	105	3.69	hsa-miR-224-3p_MIMAT0009198	10	15	10	15	0.58	-5.03	-9.3	-0.586985	CUAGGG&CCCUAG	((((((&))))))	CAAUCUUUAAUCAGUGUGUAACAUUAGGGAGGACUUGAAAGAGCCACCACAUUUUCACCGAGGCCACGCGGAGUACGAUCGAGUGUACAGUGAACAAUGCUAGGGAGAGCUGCCUAUAUGGAAGAGCCCUAAUGUGUAAAAUUAAUUUUAGUAGUGCUAUCCCCAUGUGAUUUUAAUAGCUUCUUAGGAGAAUGACAAAAAAAAAAAAAAAAAAAAAAAAAAAAAAAAA	AAAAUGGUGCCCUAGUGACUACA
NC_045512.2	178	185	179	184	2.26	hsa-miR-28-5p_MIMAT0000085	1	8	2	7	1.56	-5.03	-8.85	-0.590046	AGCUUCUU&AAGGAGCU	((((((((&))))))))	CAAUCUUUAAUCAGUGUGUAACAUUAGGGAGGACUUGAAAGAGCCACCACAUUUUCACCGAGGCCACGCGGAGUACGAUCGAGUGUACAGUGAACAAUGCUAGGGAGAGCUGCCUAUAUGGAAGAGCCCUAAUGUGUAAAAUUAAUUUUAGUAGUGCUAUCCCCAUGUGAUUUUAAUAGCUUCUUAGGAGAAUGACAAAAAAAAAAAAAAAAAAAAAAAAAAAAAAAAA	AAGGAGCUCACAGUCUAUUGAG
NC_045512.2	151	156	151	156	2.05	hsa-miR-324-3p_MIMAT0000762	3	8	3	8	0.13	-5.03	-7.21	-0.586985	GUAGUG&CACUGC	((((((&))))))	CAAUCUUUAAUCAGUGUGUAACAUUAGGGAGGACUUGAAAGAGCCACCACAUUUUCACCGAGGCCACGCGGAGUACGAUCGAGUGUACAGUGAACAAUGCUAGGGAGAGCUGCCUAUAUGGAAGAGCCCUAAUGUGUAAAAUUAAUUUUAGUAGUGCUAUCCCCAUGUGAUUUUAAUAGCUUCUUAGGAGAAUGACAAAAAAAAAAAAAAAAAAAAAAAAAAAAAAAAA	CCCACUGCCCCAGGUGCUGCUGG
NC_045512.2	187	192	187	192	2.54	hsa-miR-6820-3p_MIMAT0027541	7	12	7	12	0.01	-5.02	-7.57	-0.588873	GGAGAA&UUCUCC	((((((&))))))	CAAUCUUUAAUCAGUGUGUAACAUUAGGGAGGACUUGAAAGAGCCACCACAUUUUCACCGAGGCCACGCGGAGUACGAUCGAGUGUACAGUGAACAAUGCUAGGGAGAGCUGCCUAUAUGGAAGAGCCCUAAUGUGUAAAAUUAAUUUUAGUAGUGCUAUCCCCAUGUGAUUUUAAUAGCUUCUUAGGAGAAUGACAAAAAAAAAAAAAAAAAAAAAAAAAAAAAAAAA	UGUGACUUCUCCCCUGCCACAG
NC_045512.2	84	95	86	91	3.36	hsa-let-7f-5p_MIMAT0000067	8	19	12	17	0.23	-5.01	-8.6	-0.5877	UGUACAGUGAAC&GUAGAUUGUAUA	((((((((..((&))..))))))))	CAAUCUUUAAUCAGUGUGUAACAUUAGGGAGGACUUGAAAGAGCCACCACAUUUUCACCGAGGCCACGCGGAGUACGAUCGAGUGUACAGUGAACAAUGCUAGGGAGAGCUGCCUAUAUGGAAGAGCCCUAAUGUGUAAAAUUAAUUUUAGUAGUGCUAUCCCCAUGUGAUUUUAAUAGCUUCUUAGGAGAAUGACAAAAAAAAAAAAAAAAAAAAAAAAAAAAAAAAA	UGAGGUAGUAGAUUGUAUAGUU
NC_045512.2	107	113	108	113	3.33	hsa-miR-143-3p_MIMAT0000435	15	21	15	20	1.89	-5.01	-10.23	-0.590924	GAGCUGC&GUAGCUC	(((((((&)))))))	CAAUCUUUAAUCAGUGUGUAACAUUAGGGAGGACUUGAAAGAGCCACCACAUUUUCACCGAGGCCACGCGGAGUACGAUCGAGUGUACAGUGAACAAUGCUAGGGAGAGCUGCCUAUAUGGAAGAGCCCUAAUGUGUAAAAUUAAUUUUAGUAGUGCUAUCCCCAUGUGAUUUUAAUAGCUUCUUAGGAGAAUGACAAAAAAAAAAAAAAAAAAAAAAAAAAAAAAAAA	UGAGAUGAAGCACUGUAGCUC
NC_045512.2	14	30	14	19	4.19	hsa-miR-299-5p_MIMAT0002890	11	20	15	20	0.34	-5.01	-9.54	-0.5877	GUGUGUAACAUUAGGGA&UCCCACAUAC	((((((.......((((&))))))))))	CAAUCUUUAAUCAGUGUGUAACAUUAGGGAGGACUUGAAAGAGCCACCACAUUUUCACCGAGGCCACGCGGAGUACGAUCGAGUGUACAGUGAACAAUGCUAGGGAGAGCUGCCUAUAUGGAAGAGCCCUAAUGUGUAAAAUUAAUUUUAGUAGUGCUAUCCCCAUGUGAUUUUAAUAGCUUCUUAGGAGAAUGACAAAAAAAAAAAAAAAAAAAAAAAAAAAAAAAAA	UGGUUUACCGUCCCACAUACAU
NC_045512.2	134	145	134	139	1.29	hsa-miR-26a-1-3p_MIMAT0004499	8	21	16	21	0.79	-5.01	-7.09	-0.5877	GUGUAAAAUUAA&UUGGUUACUUGCAC	((((((((((((&))))))..))))))	CAAUCUUUAAUCAGUGUGUAACAUUAGGGAGGACUUGAAAGAGCCACCACAUUUUCACCGAGGCCACGCGGAGUACGAUCGAGUGUACAGUGAACAAUGCUAGGGAGAGCUGCCUAUAUGGAAGAGCCCUAAUGUGUAAAAUUAAUUUUAGUAGUGCUAUCCCCAUGUGAUUUUAAUAGCUUCUUAGGAGAAUGACAAAAAAAAAAAAAAAAAAAAAAAAAAAAAAAAA	CCUAUUCUUGGUUACUUGCACG
NC_045512.2	176	183	178	183	2.21	hsa-miR-149-3p_MIMAT0004609	12	19	12	17	2	-5	-9.21	-0.589745	AUAGCUUC&GGGGCUGU	((((((((&))))))))	CAAUCUUUAAUCAGUGUGUAACAUUAGGGAGGACUUGAAAGAGCCACCACAUUUUCACCGAGGCCACGCGGAGUACGAUCGAGUGUACAGUGAACAAUGCUAGGGAGAGCUGCCUAUAUGGAAGAGCCCUAAUGUGUAAAAUUAAUUUUAGUAGUGCUAUCCCCAUGUGAUUUUAAUAGCUUCUUAGGAGAAUGACAAAAAAAAAAAAAAAAAAAAAAAAAAAAAAAAA	AGGGAGGGACGGGGGCUGUGC
NC_045512.2	12	22	17	22	1.75	hsa-miR-3617-5p_MIMAT0017997	10	20	10	15	0.34	-5	-7.09	-0.586526	CAGUGUGUAAC&GUUGCAAGAUG	((...((((((&))))))...))	CAAUCUUUAAUCAGUGUGUAACAUUAGGGAGGACUUGAAAGAGCCACCACAUUUUCACCGAGGCCACGCGGAGUACGAUCGAGUGUACAGUGAACAAUGCUAGGGAGAGCUGCCUAUAUGGAAGAGCCCUAAUGUGUAAAAUUAAUUUUAGUAGUGCUAUCCCCAUGUGAUUUUAAUAGCUUCUUAGGAGAAUGACAAAAAAAAAAAAAAAAAAAAAAAAAAAAAAAAA	AAAGACAUAGUUGCAAGAUGGG
NC_045512.2	110	115	110	115	2.5	hsa-let-7b-5p_MIMAT0000063	3	8	3	8	0.05	-4.99	-7.54	-0.585353	CUGCCU&AGGUAG	((((((&))))))	CAAUCUUUAAUCAGUGUGUAACAUUAGGGAGGACUUGAAAGAGCCACCACAUUUUCACCGAGGCCACGCGGAGUACGAUCGAGUGUACAGUGAACAAUGCUAGGGAGAGCUGCCUAUAUGGAAGAGCCCUAAUGUGUAAAAUUAAUUUUAGUAGUGCUAUCCCCAUGUGAUUUUAAUAGCUUCUUAGGAGAAUGACAAAAAAAAAAAAAAAAAAAAAAAAAAAAAAAAA	UGAGGUAGUAGGUUGUGUGGUU
NC_045512.2	217	226	217	222	0	hsa-miR-3613-5p_MIMAT0017990	9	18	13	18	0	-4.99	-4.99	-0.585353	AAAAAAAAAA&UUUUUUUUUU	((((((((((&))))))))))	CAAUCUUUAAUCAGUGUGUAACAUUAGGGAGGACUUGAAAGAGCCACCACAUUUUCACCGAGGCCACGCGGAGUACGAUCGAGUGUACAGUGAACAAUGCUAGGGAGAGCUGCCUAUAUGGAAGAGCCCUAAUGUGUAAAAUUAAUUUUAGUAGUGCUAUCCCCAUGUGAUUUUAAUAGCUUCUUAGGAGAAUGACAAAAAAAAAAAAAAAAAAAAAAAAAAAAAAAAA	UGUUGUACUUUUUUUUUUGUUC
NC_045512.2	207	216	207	212	0	hsa-miR-3613-5p_MIMAT0017990	9	18	13	18	0	-4.99	-4.99	-0.585353	AAAAAAAAAA&UUUUUUUUUU	((((((((((&))))))))))	CAAUCUUUAAUCAGUGUGUAACAUUAGGGAGGACUUGAAAGAGCCACCACAUUUUCACCGAGGCCACGCGGAGUACGAUCGAGUGUACAGUGAACAAUGCUAGGGAGAGCUGCCUAUAUGGAAGAGCCCUAAUGUGUAAAAUUAAUUUUAGUAGUGCUAUCCCCAUGUGAUUUUAAUAGCUUCUUAGGAGAAUGACAAAAAAAAAAAAAAAAAAAAAAAAAAAAAAAAA	UGUUGUACUUUUUUUUUUGUUC
NC_045512.2	69	75	69	74	3.17	hsa-miR-4796-5p_MIMAT0019970	7	13	8	13	0.26	-4.99	-8.42	-0.585353	CGGAGUA&UACUCUG	(((((((&)))))))	CAAUCUUUAAUCAGUGUGUAACAUUAGGGAGGACUUGAAAGAGCCACCACAUUUUCACCGAGGCCACGCGGAGUACGAUCGAGUGUACAGUGAACAAUGCUAGGGAGAGCUGCCUAUAUGGAAGAGCCCUAAUGUGUAAAAUUAAUUUUAGUAGUGCUAUCCCCAUGUGAUUUUAAUAGCUUCUUAGGAGAAUGACAAAAAAAAAAAAAAAAAAAAAAAAAAAAAAAAA	UGUCUAUACUCUGUCACUUUAC
NC_045512.2	14	19	14	19	1.54	hsa-miR-494-3p_MIMAT0002816	5	10	5	10	0.01	-4.98	-6.53	-0.58418	GUGUGU&ACAUAC	((((((&))))))	CAAUCUUUAAUCAGUGUGUAACAUUAGGGAGGACUUGAAAGAGCCACCACAUUUUCACCGAGGCCACGCGGAGUACGAUCGAGUGUACAGUGAACAAUGCUAGGGAGAGCUGCCUAUAUGGAAGAGCCCUAAUGUGUAAAAUUAAUUUUAGUAGUGCUAUCCCCAUGUGAUUUUAAUAGCUUCUUAGGAGAAUGACAAAAAAAAAAAAAAAAAAAAAAAAAAAAAAAAA	UGAAACAUACACGGGAAACCUC
NC_045512.2	179	186	179	184	2.78	hsa-miR-423-5p_MIMAT0004748	1	8	3	8	1.45	-4.97	-9.2	-0.579983	GCUUCUUA&UGAGGGGC	((((((((&))))))))	CAAUCUUUAAUCAGUGUGUAACAUUAGGGAGGACUUGAAAGAGCCACCACAUUUUCACCGAGGCCACGCGGAGUACGAUCGAGUGUACAGUGAACAAUGCUAGGGAGAGCUGCCUAUAUGGAAGAGCCCUAAUGUGUAAAAUUAAUUUUAGUAGUGCUAUCCCCAUGUGAUUUUAAUAGCUUCUUAGGAGAAUGACAAAAAAAAAAAAAAAAAAAAAAAAAAAAAAAAA	UGAGGGGCAGAGAGCGAGACUUU
NC_045512.2	104	114	104	109	4.13	hsa-miR-642b-5p_MIMAT0022736	1	12	7	12	1.23	-4.97	-10.33	-0.583007	GGAGAGCUGCC&GGUUCCCUCUCC	((((((...((&))....))))))	CAAUCUUUAAUCAGUGUGUAACAUUAGGGAGGACUUGAAAGAGCCACCACAUUUUCACCGAGGCCACGCGGAGUACGAUCGAGUGUACAGUGAACAAUGCUAGGGAGAGCUGCCUAUAUGGAAGAGCCCUAAUGUGUAAAAUUAAUUUUAGUAGUGCUAUCCCCAUGUGAUUUUAAUAGCUUCUUAGGAGAAUGACAAAAAAAAAAAAAAAAAAAAAAAAAAAAAAAAA	GGUUCCCUCUCCAAAUGUGUCU
NC_045512.2	188	197	188	193	1.06	hsa-miR-219b-5p_MIMAT0019747	4	21	16	21	0.57	-4.96	-6.59	-0.581834	GAGAAUGACA&UGUCCAGCCACAAUUCUC	((((((((((&))))........))))))	CAAUCUUUAAUCAGUGUGUAACAUUAGGGAGGACUUGAAAGAGCCACCACAUUUUCACCGAGGCCACGCGGAGUACGAUCGAGUGUACAGUGAACAAUGCUAGGGAGAGCUGCCUAUAUGGAAGAGCCCUAAUGUGUAAAAUUAAUUUUAGUAGUGCUAUCCCCAUGUGAUUUUAAUAGCUUCUUAGGAGAAUGACAAAAAAAAAAAAAAAAAAAAAAAAAAAAAAAAA	AGAUGUCCAGCCACAAUUCUCG
NC_045512.2	1	7	1	6	0.59	hsa-miR-3059-3p_MIMAT0048634	15	21	16	21	0.08	-4.96	-5.63	-0.581834	CAAUCUU&AAGGUUG	(((((((&)))))))	CAAUCUUUAAUCAGUGUGUAACAUUAGGGAGGACUUGAAAGAGCCACCACAUUUUCACCGAGGCCACGCGGAGUACGAUCGAGUGUACAGUGAACAAUGCUAGGGAGAGCUGCCUAUAUGGAAGAGCCCUAAUGUGUAAAAUUAAUUUUAGUAGUGCUAUCCCCAUGUGAUUUUAAUAGCUUCUUAGGAGAAUGACAAAAAAAAAAAAAAAAAAAAAAAAAAAAAAAAA	CCUCUAGGGAAGAGAAGGUUGG
NC_045512.2	162	172	167	172	2.97	hsa-miR-3617-5p_MIMAT0017997	9	22	9	14	0.34	-4.96	-8.27	-0.581834	CCCAUGUGAUU&AGUUGCAAGAUGGG	(((((((((((&)))))))...))))	CAAUCUUUAAUCAGUGUGUAACAUUAGGGAGGACUUGAAAGAGCCACCACAUUUUCACCGAGGCCACGCGGAGUACGAUCGAGUGUACAGUGAACAAUGCUAGGGAGAGCUGCCUAUAUGGAAGAGCCCUAAUGUGUAAAAUUAAUUUUAGUAGUGCUAUCCCCAUGUGAUUUUAAUAGCUUCUUAGGAGAAUGACAAAAAAAAAAAAAAAAAAAAAAAAAAAAAAAAA	AAAGACAUAGUUGCAAGAUGGG
NC_045512.2	176	184	178	183	2.38	hsa-miR-655-5p_MIMAT0026626	1	9	2	7	0.99	-4.96	-8.33	-0.581834	AUAGCUUCU&AGAGGUUAU	(((((((((&)))))))))	CAAUCUUUAAUCAGUGUGUAACAUUAGGGAGGACUUGAAAGAGCCACCACAUUUUCACCGAGGCCACGCGGAGUACGAUCGAGUGUACAGUGAACAAUGCUAGGGAGAGCUGCCUAUAUGGAAGAGCCCUAAUGUGUAAAAUUAAUUUUAGUAGUGCUAUCCCCAUGUGAUUUUAAUAGCUUCUUAGGAGAAUGACAAAAAAAAAAAAAAAAAAAAAAAAAAAAAAAAA	AGAGGUUAUCCGUGUUAUGUUC
NC_045512.2	117	130	117	122	4.11	hsa-miR-625-5p_MIMAT0003294	1	17	12	17	1.39	-4.95	-10.45	-0.583847	UAUGGAAGAGCCCU&AGGGGGAAAGUUCUAUA	(((((((...((((&))))......)))))))	CAAUCUUUAAUCAGUGUGUAACAUUAGGGAGGACUUGAAAGAGCCACCACAUUUUCACCGAGGCCACGCGGAGUACGAUCGAGUGUACAGUGAACAAUGCUAGGGAGAGCUGCCUAUAUGGAAGAGCCCUAAUGUGUAAAAUUAAUUUUAGUAGUGCUAUCCCCAUGUGAUUUUAAUAGCUUCUUAGGAGAAUGACAAAAAAAAAAAAAAAAAAAAAAAAAAAAAAAAA	AGGGGGAAAGUUCUAUAGUCC
NC_045512.2	6	15	10	15	2.13	hsa-miR-552-3p_MIMAT0003215	9	18	9	14	2.77	-4.94	-9.84	-0.582668	UUUAAUCAGU&ACUGGUUAGA	((((((((((&))))))))))	CAAUCUUUAAUCAGUGUGUAACAUUAGGGAGGACUUGAAAGAGCCACCACAUUUUCACCGAGGCCACGCGGAGUACGAUCGAGUGUACAGUGAACAAUGCUAGGGAGAGCUGCCUAUAUGGAAGAGCCCUAAUGUGUAAAAUUAAUUUUAGUAGUGCUAUCCCCAUGUGAUUUUAAUAGCUUCUUAGGAGAAUGACAAAAAAAAAAAAAAAAAAAAAAAAAAAAAAAAA	AACAGGUGACUGGUUAGACAA
NC_045512.2	148	156	148	153	2.18	hsa-miR-32-5p_MIMAT0000090	8	16	11	16	1.38	-4.92	-8.48	-0.577142	UUAGUAGUG&CAUUACUAA	(((((((((&)))))))))	CAAUCUUUAAUCAGUGUGUAACAUUAGGGAGGACUUGAAAGAGCCACCACAUUUUCACCGAGGCCACGCGGAGUACGAUCGAGUGUACAGUGAACAAUGCUAGGGAGAGCUGCCUAUAUGGAAGAGCCCUAAUGUGUAAAAUUAAUUUUAGUAGUGCUAUCCCCAUGUGAUUUUAAUAGCUUCUUAGGAGAAUGACAAAAAAAAAAAAAAAAAAAAAAAAAAAAAAAAA	UAUUGCACAUUACUAAGUUGCA
NC_045512.2	110	115	110	115	2.5	hsa-let-7c-5p_MIMAT0000064	3	8	3	8	0.14	-4.9	-7.54	-0.574796	CUGCCU&AGGUAG	((((((&))))))	CAAUCUUUAAUCAGUGUGUAACAUUAGGGAGGACUUGAAAGAGCCACCACAUUUUCACCGAGGCCACGCGGAGUACGAUCGAGUGUACAGUGAACAAUGCUAGGGAGAGCUGCCUAUAUGGAAGAGCCCUAAUGUGUAAAAUUAAUUUUAGUAGUGCUAUCCCCAUGUGAUUUUAAUAGCUUCUUAGGAGAAUGACAAAAAAAAAAAAAAAAAAAAAAAAAAAAAAAAA	UGAGGUAGUAGGUUGUAUGGUU
NC_045512.2	13	19	14	19	1.65	hsa-miR-1-5p_MIMAT0031892	1	7	1	6	0.57	-4.9	-7.12	-0.574796	AGUGUGU&ACAUACU	(((((((&)))))))	CAAUCUUUAAUCAGUGUGUAACAUUAGGGAGGACUUGAAAGAGCCACCACAUUUUCACCGAGGCCACGCGGAGUACGAUCGAGUGUACAGUGAACAAUGCUAGGGAGAGCUGCCUAUAUGGAAGAGCCCUAAUGUGUAAAAUUAAUUUUAGUAGUGCUAUCCCCAUGUGAUUUUAAUAGCUUCUUAGGAGAAUGACAAAAAAAAAAAAAAAAAAAAAAAAAAAAAAAAA	ACAUACUUCUUUAUAUGCCCAU
NC_045512.2	186	191	186	191	2.54	hsa-miR-485-3p_MIMAT0002176	13	18	13	18	0.04	-4.89	-7.47	-0.573623	AGGAGA&UCUCCU	((((((&))))))	CAAUCUUUAAUCAGUGUGUAACAUUAGGGAGGACUUGAAAGAGCCACCACAUUUUCACCGAGGCCACGCGGAGUACGAUCGAGUGUACAGUGAACAAUGCUAGGGAGAGCUGCCUAUAUGGAAGAGCCCUAAUGUGUAAAAUUAAUUUUAGUAGUGCUAUCCCCAUGUGAUUUUAAUAGCUUCUUAGGAGAAUGACAAAAAAAAAAAAAAAAAAAAAAAAAAAAAAAAA	GUCAUACACGGCUCUCCUCUCU
NC_045512.2	60	71	60	65	4.03	hsa-miR-767-3p_MIMAT0003883	2	22	17	22	1.22	-4.89	-10.14	-0.570647	GAGGCCACGCGG&CUGCUCAUACCCCAUGGUUUC	(((((((.((((&))))..........)))))))	CAAUCUUUAAUCAGUGUGUAACAUUAGGGAGGACUUGAAAGAGCCACCACAUUUUCACCGAGGCCACGCGGAGUACGAUCGAGUGUACAGUGAACAAUGCUAGGGAGAGCUGCCUAUAUGGAAGAGCCCUAAUGUGUAAAAUUAAUUUUAGUAGUGCUAUCCCCAUGUGAUUUUAAUAGCUUCUUAGGAGAAUGACAAAAAAAAAAAAAAAAAAAAAAAAAAAAAAAAA	UCUGCUCAUACCCCAUGGUUUCU
NC_045512.2	10	22	17	22	2.1	hsa-miR-4670-3p_MIMAT0019751	5	17	5	10	2.03	-4.88	-9.01	-0.57245	AUCAGUGUGUAAC&GUUACAUCAUGGU	((((.((((((((&)))))).))))))	CAAUCUUUAAUCAGUGUGUAACAUUAGGGAGGACUUGAAAGAGCCACCACAUUUUCACCGAGGCCACGCGGAGUACGAUCGAGUGUACAGUGAACAAUGCUAGGGAGAGCUGCCUAUAUGGAAGAGCCCUAAUGUGUAAAAUUAAUUUUAGUAGUGCUAUCCCCAUGUGAUUUUAAUAGCUUCUUAGGAGAAUGACAAAAAAAAAAAAAAAAAAAAAAAAAAAAAAAAA	UGAAGUUACAUCAUGGUCGCUU
NC_045512.2	151	169	157	162	4.66	hsa-miR-140-3p_MIMAT0004597	4	19	8	13	3.22	-4.87	-12.75	-0.574411	GUAGUGCUAUCCCCAUGUG&CACAGGGUAGAACCAC	((.((.((((((...((((&)))))))))).)).))	CAAUCUUUAAUCAGUGUGUAACAUUAGGGAGGACUUGAAAGAGCCACCACAUUUUCACCGAGGCCACGCGGAGUACGAUCGAGUGUACAGUGAACAAUGCUAGGGAGAGCUGCCUAUAUGGAAGAGCCCUAAUGUGUAAAAUUAAUUUUAGUAGUGCUAUCCCCAUGUGAUUUUAAUAGCUUCUUAGGAGAAUGACAAAAAAAAAAAAAAAAAAAAAAAAAAAAAAAAA	UACCACAGGGUAGAACCACGG
NC_045512.2	112	129	124	129	6.03	hsa-miR-3677-3p_MIMAT0018101	6	21	6	11	9.19	-4.87	-20.09	-0.571277	GCCUAUAUGGAAGAGCCC&GGGCUCUGGCCACGGC	(((....(((.(((((((&)))))))..))).)))	CAAUCUUUAAUCAGUGUGUAACAUUAGGGAGGACUUGAAAGAGCCACCACAUUUUCACCGAGGCCACGCGGAGUACGAUCGAGUGUACAGUGAACAAUGCUAGGGAGAGCUGCCUAUAUGGAAGAGCCCUAAUGUGUAAAAUUAAUUUUAGUAGUGCUAUCCCCAUGUGAUUUUAAUAGCUUCUUAGGAGAAUGACAAAAAAAAAAAAAAAAAAAAAAAAAAAAAAAAA	CUCGUGGGCUCUGGCCACGGCC
NC_045512.2	107	112	107	112	1.75	hsa-miR-584-3p_MIMAT0022708	2	7	2	7	0.01	-4.87	-6.63	-0.571277	GAGCUG&CAGUUC	((((((&))))))	CAAUCUUUAAUCAGUGUGUAACAUUAGGGAGGACUUGAAAGAGCCACCACAUUUUCACCGAGGCCACGCGGAGUACGAUCGAGUGUACAGUGAACAAUGCUAGGGAGAGCUGCCUAUAUGGAAGAGCCCUAAUGUGUAAAAUUAAUUUUAGUAGUGCUAUCCCCAUGUGAUUUUAAUAGCUUCUUAGGAGAAUGACAAAAAAAAAAAAAAAAAAAAAAAAAAAAAAAAA	UCAGUUCCAGGCCAACCAGGCU
NC_045512.2	62	67	62	67	1.92	hsa-miR-3677-5p_MIMAT0019221	3	8	3	8	5.91	-4.86	-12.69	-0.570104	GGCCAC&GUGGCC	((((((&))))))	CAAUCUUUAAUCAGUGUGUAACAUUAGGGAGGACUUGAAAGAGCCACCACAUUUUCACCGAGGCCACGCGGAGUACGAUCGAGUGUACAGUGAACAAUGCUAGGGAGAGCUGCCUAUAUGGAAGAGCCCUAAUGUGUAAAAUUAAUUUUAGUAGUGCUAUCCCCAUGUGAUUUUAAUAGCUUCUUAGGAGAAUGACAAAAAAAAAAAAAAAAAAAAAAAAAAAAAAAAA	CAGUGGCCAGAGCCCUGCAGUG
NC_045512.2	106	113	108	113	3.39	hsa-miR-548ar-5p_MIMAT0022265	11	18	11	16	0.99	-4.86	-9.24	-0.573232	AGAGCUGC&GCAGUUUU	((((((((&))))))))	CAAUCUUUAAUCAGUGUGUAACAUUAGGGAGGACUUGAAAGAGCCACCACAUUUUCACCGAGGCCACGCGGAGUACGAUCGAGUGUACAGUGAACAAUGCUAGGGAGAGCUGCCUAUAUGGAAGAGCCCUAAUGUGUAAAAUUAAUUUUAGUAGUGCUAUCCCCAUGUGAUUUUAAUAGCUUCUUAGGAGAAUGACAAAAAAAAAAAAAAAAAAAAAAAAAAAAAAAAA	AAAAGUAAUUGCAGUUUUUGC
NC_045512.2	125	144	139	144	2.58	hsa-miR-590-3p_MIMAT0004801	1	18	1	6	0.14	-4.86	-7.58	-0.573232	AGCCCUAAUGUGUAAAAUUA&UAAUUUUAUGUAUAAGCU	(((....(((((((((((((&)))))))))))))..)))	CAAUCUUUAAUCAGUGUGUAACAUUAGGGAGGACUUGAAAGAGCCACCACAUUUUCACCGAGGCCACGCGGAGUACGAUCGAGUGUACAGUGAACAAUGCUAGGGAGAGCUGCCUAUAUGGAAGAGCCCUAAUGUGUAAAAUUAAUUUUAGUAGUGCUAUCCCCAUGUGAUUUUAAUAGCUUCUUAGGAGAAUGACAAAAAAAAAAAAAAAAAAAAAAAAAAAAAAAAA	UAAUUUUAUGUAUAAGCUAGU
NC_045512.2	110	115	110	115	2.5	hsa-let-7f-5p_MIMAT0000067	3	8	3	8	0.19	-4.85	-7.54	-0.568931	CUGCCU&AGGUAG	((((((&))))))	CAAUCUUUAAUCAGUGUGUAACAUUAGGGAGGACUUGAAAGAGCCACCACAUUUUCACCGAGGCCACGCGGAGUACGAUCGAGUGUACAGUGAACAAUGCUAGGGAGAGCUGCCUAUAUGGAAGAGCCCUAAUGUGUAAAAUUAAUUUUAGUAGUGCUAUCCCCAUGUGAUUUUAAUAGCUUCUUAGGAGAAUGACAAAAAAAAAAAAAAAAAAAAAAAAAAAAAAAAA	UGAGGUAGUAGAUUGUAUAGUU
NC_045512.2	81	99	88	93	3.91	hsa-miR-15b-3p_MIMAT0004586	6	20	12	17	0.39	-4.85	-9.15	-0.568931	GAGUGUACAGUGAACAAUG&CAUUAUUUGCUGCUC	(((....(((((((.((((&)))).))))))))))	CAAUCUUUAAUCAGUGUGUAACAUUAGGGAGGACUUGAAAGAGCCACCACAUUUUCACCGAGGCCACGCGGAGUACGAUCGAGUGUACAGUGAACAAUGCUAGGGAGAGCUGCCUAUAUGGAAGAGCCCUAAUGUGUAAAAUUAAUUUUAGUAGUGCUAUCCCCAUGUGAUUUUAAUAGCUUCUUAGGAGAAUGACAAAAAAAAAAAAAAAAAAAAAAAAAAAAAAAAA	CGAAUCAUUAUUUGCUGCUCUA
NC_045512.2	9	15	10	15	1.92	hsa-miR-340-5p_MIMAT0004692	16	22	16	21	0.1	-4.85	-6.87	-0.568931	AAUCAGU&ACUGAUU	(((((((&)))))))	CAAUCUUUAAUCAGUGUGUAACAUUAGGGAGGACUUGAAAGAGCCACCACAUUUUCACCGAGGCCACGCGGAGUACGAUCGAGUGUACAGUGAACAAUGCUAGGGAGAGCUGCCUAUAUGGAAGAGCCCUAAUGUGUAAAAUUAAUUUUAGUAGUGCUAUCCCCAUGUGAUUUUAAUAGCUUCUUAGGAGAAUGACAAAAAAAAAAAAAAAAAAAAAAAAAAAAAAAAA	UUAUAAAGCAAUGAGACUGAUU
NC_045512.2	110	115	110	115	2.5	hsa-let-7a-5p_MIMAT0000062	3	8	3	8	0.2	-4.84	-7.54	-0.567758	CUGCCU&AGGUAG	((((((&))))))	CAAUCUUUAAUCAGUGUGUAACAUUAGGGAGGACUUGAAAGAGCCACCACAUUUUCACCGAGGCCACGCGGAGUACGAUCGAGUGUACAGUGAACAAUGCUAGGGAGAGCUGCCUAUAUGGAAGAGCCCUAAUGUGUAAAAUUAAUUUUAGUAGUGCUAUCCCCAUGUGAUUUUAAUAGCUUCUUAGGAGAAUGACAAAAAAAAAAAAAAAAAAAAAAAAAAAAAAAAA	UGAGGUAGUAGGUUGUAUAGUU
NC_045512.2	90	101	90	95	2.58	hsa-miR-15b-5p_MIMAT0000417	2	21	16	21	0.67	-4.84	-8.09	-0.567758	GUGAACAAUGCU&AGCAGCACAUCAUGGUUUAC	((((((..((((&))))..........))))))	CAAUCUUUAAUCAGUGUGUAACAUUAGGGAGGACUUGAAAGAGCCACCACAUUUUCACCGAGGCCACGCGGAGUACGAUCGAGUGUACAGUGAACAAUGCUAGGGAGAGCUGCCUAUAUGGAAGAGCCCUAAUGUGUAAAAUUAAUUUUAGUAGUGCUAUCCCCAUGUGAUUUUAAUAGCUUCUUAGGAGAAUGACAAAAAAAAAAAAAAAAAAAAAAAAAAAAAAAAA	UAGCAGCACAUCAUGGUUUACA
NC_045512.2	126	139	133	138	2.51	hsa-miR-148b-5p_MIMAT0004699	9	22	10	15	1.61	-4.84	-8.96	-0.567758	GCCCUAAUGUGUAA&UUAUACACUCAGGC	(((....(((((((&)))))))....)))	CAAUCUUUAAUCAGUGUGUAACAUUAGGGAGGACUUGAAAGAGCCACCACAUUUUCACCGAGGCCACGCGGAGUACGAUCGAGUGUACAGUGAACAAUGCUAGGGAGAGCUGCCUAUAUGGAAGAGCCCUAAUGUGUAAAAUUAAUUUUAGUAGUGCUAUCCCCAUGUGAUUUUAAUAGCUUCUUAGGAGAAUGACAAAAAAAAAAAAAAAAAAAAAAAAAAAAAAAAA	AAGUUCUGUUAUACACUCAGGC
NC_045512.2	69	80	71	76	3.41	hsa-miR-4709-3p_MIMAT0019812	9	19	12	17	4.33	-4.84	-12.58	-0.564812	CGGAGUACGAUC&GAGGUGCUCUG	((((((((..((&)).))))))))	CAAUCUUUAAUCAGUGUGUAACAUUAGGGAGGACUUGAAAGAGCCACCACAUUUUCACCGAGGCCACGCGGAGUACGAUCGAGUGUACAGUGAACAAUGCUAGGGAGAGCUGCCUAUAUGGAAGAGCCCUAAUGUGUAAAAUUAAUUUUAGUAGUGCUAUCCCCAUGUGAUUUUAAUAGCUUCUUAGGAGAAUGACAAAAAAAAAAAAAAAAAAAAAAAAAAAAAAAAA	UUGAAGAGGAGGUGCUCUGUAGC
NC_045512.2	2	19	2	7	2.58	hsa-miR-502-3p_MIMAT0004775	2	20	15	20	2.67	-4.84	-10.09	-0.567758	AAUCUUUAAUCAGUGUGU&AUGCACCUGGGCAAGGAUU	(((((((...((((((((&)))))).))...)))))))	CAAUCUUUAAUCAGUGUGUAACAUUAGGGAGGACUUGAAAGAGCCACCACAUUUUCACCGAGGCCACGCGGAGUACGAUCGAGUGUACAGUGAACAAUGCUAGGGAGAGCUGCCUAUAUGGAAGAGCCCUAAUGUGUAAAAUUAAUUUUAGUAGUGCUAUCCCCAUGUGAUUUUAAUAGCUUCUUAGGAGAAUGACAAAAAAAAAAAAAAAAAAAAAAAAAAAAAAAAA	AAUGCACCUGGGCAAGGAUUCA
NC_045512.2	7	17	8	13	2.24	hsa-miR-655-3p_MIMAT0003331	4	15	9	14	0.52	-4.82	-7.58	-0.565412	UUAAUCAGUGU&AUACAUGGUUAA	(((((((((((&)))).)))))))	CAAUCUUUAAUCAGUGUGUAACAUUAGGGAGGACUUGAAAGAGCCACCACAUUUUCACCGAGGCCACGCGGAGUACGAUCGAGUGUACAGUGAACAAUGCUAGGGAGAGCUGCCUAUAUGGAAGAGCCCUAAUGUGUAAAAUUAAUUUUAGUAGUGCUAUCCCCAUGUGAUUUUAAUAGCUUCUUAGGAGAAUGACAAAAAAAAAAAAAAAAAAAAAAAAAAAAAAAAA	AUAAUACAUGGUUAACCUCUUU
NC_045512.2	63	87	82	87	7.12	hsa-miR-4793-3p_MIMAT0019966	3	22	3	8	2.65	-4.78	-14.55	-0.557811	GCCACGCGGAGUACGAUCGAGUGUA&UGCACUGUGAGUUGGCUGGC	((((.((.....((.....((((((&))))))....))..))))))	CAAUCUUUAAUCAGUGUGUAACAUUAGGGAGGACUUGAAAGAGCCACCACAUUUUCACCGAGGCCACGCGGAGUACGAUCGAGUGUACAGUGAACAAUGCUAGGGAGAGCUGCCUAUAUGGAAGAGCCCUAAUGUGUAAAAUUAAUUUUAGUAGUGCUAUCCCCAUGUGAUUUUAAUAGCUUCUUAGGAGAAUGACAAAAAAAAAAAAAAAAAAAAAAAAAAAAAAAAA	UCUGCACUGUGAGUUGGCUGGCU
NC_045512.2	166	173	166	171	2.29	hsa-miR-342-3p_MIMAT0000753	11	18	13	18	0.29	-4.77	-7.35	-0.556644	UGUGAUUU&AAAUCGCA	((((((((&))))))))	CAAUCUUUAAUCAGUGUGUAACAUUAGGGAGGACUUGAAAGAGCCACCACAUUUUCACCGAGGCCACGCGGAGUACGAUCGAGUGUACAGUGAACAAUGCUAGGGAGAGCUGCCUAUAUGGAAGAGCCCUAAUGUGUAAAAUUAAUUUUAGUAGUGCUAUCCCCAUGUGAUUUUAAUAGCUUCUUAGGAGAAUGACAAAAAAAAAAAAAAAAAAAAAAAAAAAAAAAAA	UCUCACACAGAAAUCGCACCCGU
NC_045512.2	186	192	187	192	2.63	hsa-miR-29c-5p_MIMAT0004673	9	15	9	14	1.41	-4.74	-8.78	-0.556027	AGGAGAA&UUCUCCU	(((((((&)))))))	CAAUCUUUAAUCAGUGUGUAACAUUAGGGAGGACUUGAAAGAGCCACCACAUUUUCACCGAGGCCACGCGGAGUACGAUCGAGUGUACAGUGAACAAUGCUAGGGAGAGCUGCCUAUAUGGAAGAGCCCUAAUGUGUAAAAUUAAUUUUAGUAGUGCUAUCCCCAUGUGAUUUUAAUAGCUUCUUAGGAGAAUGACAAAAAAAAAAAAAAAAAAAAAAAAAAAAAAAAA	UGACCGAUUUCUCCUGGUGUUC
NC_045512.2	110	115	110	115	2.5	hsa-miR-34c-5p_MIMAT0000686	1	6	1	6	2.28	-4.73	-9.51	-0.551976	CUGCCU&AGGCAG	((((((&))))))	CAAUCUUUAAUCAGUGUGUAACAUUAGGGAGGACUUGAAAGAGCCACCACAUUUUCACCGAGGCCACGCGGAGUACGAUCGAGUGUACAGUGAACAAUGCUAGGGAGAGCUGCCUAUAUGGAAGAGCCCUAAUGUGUAAAAUUAAUUUUAGUAGUGCUAUCCCCAUGUGAUUUUAAUAGCUUCUUAGGAGAAUGACAAAAAAAAAAAAAAAAAAAAAAAAAAAAAAAAA	AGGCAGUGUAGUUAGCUGAUUGC
NC_045512.2	179	184	179	184	1.04	hsa-miR-1910-3p_MIMAT0026917	6	11	6	11	0.88	-4.72	-6.64	-0.559941	GCUUCU&AGAAGC	((((((&))))))	CAAUCUUUAAUCAGUGUGUAACAUUAGGGAGGACUUGAAAGAGCCACCACAUUUUCACCGAGGCCACGCGGAGUACGAUCGAGUGUACAGUGAACAAUGCUAGGGAGAGCUGCCUAUAUGGAAGAGCCCUAAUGUGUAAAAUUAAUUUUAGUAGUGCUAUCCCCAUGUGAUUUUAAUAGCUUCUUAGGAGAAUGACAAAAAAAAAAAAAAAAAAAAAAAAAAAAAAAAA	GAGGCAGAAGCAGGAUGACA
NC_045512.2	2	20	3	8	2.58	hsa-miR-519b-3p_MIMAT0002837	5	22	16	21	1.79	-4.72	-9.09	-0.553681	AAUCUUUAAUCAGUGUGUA&UGCAUCCUUUUAGAGGUU	(((((((((..((..((((&))))..)).)))))))))	CAAUCUUUAAUCAGUGUGUAACAUUAGGGAGGACUUGAAAGAGCCACCACAUUUUCACCGAGGCCACGCGGAGUACGAUCGAGUGUACAGUGAACAAUGCUAGGGAGAGCUGCCUAUAUGGAAGAGCCCUAAUGUGUAAAAUUAAUUUUAGUAGUGCUAUCCCCAUGUGAUUUUAAUAGCUUCUUAGGAGAAUGACAAAAAAAAAAAAAAAAAAAAAAAAAAAAAAAAA	AAAGUGCAUCCUUUUAGAGGUU
NC_045512.2	110	118	111	116	4.77	hsa-miR-509-3p_MIMAT0002881	14	22	16	21	0.86	-4.72	-10.35	-0.553681	CUGCCUAUA&UGUGGGUAG	(((((((((&)))))))))	CAAUCUUUAAUCAGUGUGUAACAUUAGGGAGGACUUGAAAGAGCCACCACAUUUUCACCGAGGCCACGCGGAGUACGAUCGAGUGUACAGUGAACAAUGCUAGGGAGAGCUGCCUAUAUGGAAGAGCCCUAAUGUGUAAAAUUAAUUUUAGUAGUGCUAUCCCCAUGUGAUUUUAAUAGCUUCUUAGGAGAAUGACAAAAAAAAAAAAAAAAAAAAAAAAAAAAAAAAA	UGAUUGGUACGUCUGUGGGUAG
NC_045512.2	108	113	108	113	1.44	hsa-miR-548am-3p_MIMAT0019076	9	14	9	14	0.75	-4.72	-6.91	-0.553681	AGCUGC&GCAGUU	((((((&))))))	CAAUCUUUAAUCAGUGUGUAACAUUAGGGAGGACUUGAAAGAGCCACCACAUUUUCACCGAGGCCACGCGGAGUACGAUCGAGUGUACAGUGAACAAUGCUAGGGAGAGCUGCCUAUAUGGAAGAGCCCUAAUGUGUAAAAUUAAUUUUAGUAGUGCUAUCCCCAUGUGAUUUUAAUAGCUUCUUAGGAGAAUGACAAAAAAAAAAAAAAAAAAAAAAAAAAAAAAAAA	CAAAAACUGCAGUUACUUUUGU
NC_045512.2	176	182	176	181	2.07	hsa-miR-888-5p_MIMAT0004916	9	15	10	15	0.24	-4.72	-7.03	-0.556719	AUAGCUU&AAGCUGU	(((((((&)))))))	CAAUCUUUAAUCAGUGUGUAACAUUAGGGAGGACUUGAAAGAGCCACCACAUUUUCACCGAGGCCACGCGGAGUACGAUCGAGUGUACAGUGAACAAUGCUAGGGAGAGCUGCCUAUAUGGAAGAGCCCUAAUGUGUAAAAUUAAUUUUAGUAGUGCUAUCCCCAUGUGAUUUUAAUAGCUUCUUAGGAGAAUGACAAAAAAAAAAAAAAAAAAAAAAAAAAAAAAAAA	UACUCAAAAAGCUGUCAGUCA
NC_045512.2	58	67	59	64	4.24	hsa-miR-33b-3p_MIMAT0004811	3	11	5	10	6.21	-4.71	-15.16	-0.552508	CCGAGGCCAC&GUGCCUCGG	(((((((.((&)))))))))	CAAUCUUUAAUCAGUGUGUAACAUUAGGGAGGACUUGAAAGAGCCACCACAUUUUCACCGAGGCCACGCGGAGUACGAUCGAGUGUACAGUGAACAAUGCUAGGGAGAGCUGCCUAUAUGGAAGAGCCCUAAUGUGUAAAAUUAAUUUUAGUAGUGCUAUCCCCAUGUGAUUUUAAUAGCUUCUUAGGAGAAUGACAAAAAAAAAAAAAAAAAAAAAAAAAAAAAAAAA	CAGUGCCUCGGCAGUGCAGCCC
NC_045512.2	78	83	78	83	0.67	hsa-miR-409-3p_MIMAT0001639	9	14	9	14	0.73	-4.71	-6.11	-0.552508	AUCGAG&CUCGGU	((((((&))))))	CAAUCUUUAAUCAGUGUGUAACAUUAGGGAGGACUUGAAAGAGCCACCACAUUUUCACCGAGGCCACGCGGAGUACGAUCGAGUGUACAGUGAACAAUGCUAGGGAGAGCUGCCUAUAUGGAAGAGCCCUAAUGUGUAAAAUUAAUUUUAGUAGUGCUAUCCCCAUGUGAUUUUAAUAGCUUCUUAGGAGAAUGACAAAAAAAAAAAAAAAAAAAAAAAAAAAAAAAAA	GAAUGUUGCUCGGUGAACCCCU
NC_045512.2	97	114	100	105	5.84	hsa-miR-539-5p_MIMAT0003163	1	20	12	17	2.16	-4.71	-12.71	-0.552508	AUGCUAGGGAGAGCUGCC&GGAGAAAUUAUCCUUGGUGU	((((((((((...((.((&))))......))))))))))	CAAUCUUUAAUCAGUGUGUAACAUUAGGGAGGACUUGAAAGAGCCACCACAUUUUCACCGAGGCCACGCGGAGUACGAUCGAGUGUACAGUGAACAAUGCUAGGGAGAGCUGCCUAUAUGGAAGAGCCCUAAUGUGUAAAAUUAAUUUUAGUAGUGCUAUCCCCAUGUGAUUUUAAUAGCUUCUUAGGAGAAUGACAAAAAAAAAAAAAAAAAAAAAAAAAAAAAAAAA	GGAGAAAUUAUCCUUGGUGUGU
NC_045512.2	186	198	186	191	3.27	hsa-miR-873-5p_MIMAT0004953	9	21	16	21	3.87	-4.7	-11.84	-0.55436	AGGAGAAUGACAA&UUGUGAGUCUCCU	((((((...((((&))))...))))))	CAAUCUUUAAUCAGUGUGUAACAUUAGGGAGGACUUGAAAGAGCCACCACAUUUUCACCGAGGCCACGCGGAGUACGAUCGAGUGUACAGUGAACAAUGCUAGGGAGAGCUGCCUAUAUGGAAGAGCCCUAAUGUGUAAAAUUAAUUUUAGUAGUGCUAUCCCCAUGUGAUUUUAAUAGCUUCUUAGGAGAAUGACAAAAAAAAAAAAAAAAAAAAAAAAAAAAAAAAA	GCAGGAACUUGUGAGUCUCCU
NC_045512.2	27	34	27	32	3.92	hsa-let-7f-2-3p_MIMAT0004487	15	22	17	22	2.03	-4.69	-10.64	-0.550162	GGGAGGAC&GUCUUUCC	((((((((&))))))))	CAAUCUUUAAUCAGUGUGUAACAUUAGGGAGGACUUGAAAGAGCCACCACAUUUUCACCGAGGCCACGCGGAGUACGAUCGAGUGUACAGUGAACAAUGCUAGGGAGAGCUGCCUAUAUGGAAGAGCCCUAAUGUGUAAAAUUAAUUUUAGUAGUGCUAUCCCCAUGUGAUUUUAAUAGCUUCUUAGGAGAAUGACAAAAAAAAAAAAAAAAAAAAAAAAAAAAAAAAA	CUAUACAGUCUACUGUCUUUCC
NC_045512.2	123	138	133	138	3.47	hsa-miR-1185-2-3p_MIMAT0022713	2	19	2	7	3.8	-4.69	-11.96	-0.550162	AGAGCCCUAAUGUGUA&UAUACAGGGGGAGACUCU	(((((((...((((((&))))))..)))...))))	CAAUCUUUAAUCAGUGUGUAACAUUAGGGAGGACUUGAAAGAGCCACCACAUUUUCACCGAGGCCACGCGGAGUACGAUCGAGUGUACAGUGAACAAUGCUAGGGAGAGCUGCCUAUAUGGAAGAGCCCUAAUGUGUAAAAUUAAUUUUAGUAGUGCUAUCCCCAUGUGAUUUUAAUAGCUUCUUAGGAGAAUGACAAAAAAAAAAAAAAAAAAAAAAAAAAAAAAAAA	AUAUACAGGGGGAGACUCUCAU
NC_045512.2	153	161	153	158	2.74	hsa-miR-518a-3p_MIMAT0002863	1	9	4	9	0.99	-4.69	-8.42	-0.550162	AGUGCUAUC&GAAAGCGCU	((((((.((&)).))))))	CAAUCUUUAAUCAGUGUGUAACAUUAGGGAGGACUUGAAAGAGCCACCACAUUUUCACCGAGGCCACGCGGAGUACGAUCGAGUGUACAGUGAACAAUGCUAGGGAGAGCUGCCUAUAUGGAAGAGCCCUAAUGUGUAAAAUUAAUUUUAGUAGUGCUAUCCCCAUGUGAUUUUAAUAGCUUCUUAGGAGAAUGACAAAAAAAAAAAAAAAAAAAAAAAAAAAAAAAAA	GAAAGCGCUUCCCUUUGCUGGA
NC_045512.2	112	128	116	121	5.69	hsa-miR-154-5p_MIMAT0000452	3	17	9	14	2.76	-4.68	-13.13	-0.548989	GCCUAUAUGGAAGAGCC&GGUUAUCCGUGUUGC	((..(((((((..((((&)))).))))))).))	CAAUCUUUAAUCAGUGUGUAACAUUAGGGAGGACUUGAAAGAGCCACCACAUUUUCACCGAGGCCACGCGGAGUACGAUCGAGUGUACAGUGAACAAUGCUAGGGAGAGCUGCCUAUAUGGAAGAGCCCUAAUGUGUAAAAUUAAUUUUAGUAGUGCUAUCCCCAUGUGAUUUUAAUAGCUUCUUAGGAGAAUGACAAAAAAAAAAAAAAAAAAAAAAAAAAAAAAAAA	UAGGUUAUCCGUGUUGCCUUCG
NC_045512.2	78	92	87	92	3.45	hsa-miR-200a-3p_MIMAT0000682	4	20	4	9	1.34	-4.68	-9.47	-0.548989	AUCGAGUGUACAGUG&CACUGUCUGGUAACGAU	((((.....((((((&)))))).......))))	CAAUCUUUAAUCAGUGUGUAACAUUAGGGAGGACUUGAAAGAGCCACCACAUUUUCACCGAGGCCACGCGGAGUACGAUCGAGUGUACAGUGAACAAUGCUAGGGAGAGCUGCCUAUAUGGAAGAGCCCUAAUGUGUAAAAUUAAUUUUAGUAGUGCUAUCCCCAUGUGAUUUUAAUAGCUUCUUAGGAGAAUGACAAAAAAAAAAAAAAAAAAAAAAAAAAAAAAAAA	UAACACUGUCUGGUAACGAUGU
NC_045512.2	125	137	132	137	2.55	hsa-miR-3177-5p_MIMAT0019215	8	23	8	13	4.85	-4.68	-12.08	-0.546141	AGCCCUAAUGUGU&ACACGUGCCAGGCGCU	((((((.((((((&))))))...))).)))	CAAUCUUUAAUCAGUGUGUAACAUUAGGGAGGACUUGAAAGAGCCACCACAUUUUCACCGAGGCCACGCGGAGUACGAUCGAGUGUACAGUGAACAAUGCUAGGGAGAGCUGCCUAUAUGGAAGAGCCCUAAUGUGUAAAAUUAAUUUUAGUAGUGCUAUCCCCAUGUGAUUUUAAUAGCUUCUUAGGAGAAUGACAAAAAAAAAAAAAAAAAAAAAAAAAAAAAAAAA	UGUGUACACACGUGCCAGGCGCU
NC_045512.2	23	29	23	28	3.03	hsa-miR-3157-3p_MIMAT0019210	4	10	5	10	1.43	-4.68	-9.14	-0.548989	AUUAGGG&CCCUAGU	(((((((&)))))))	CAAUCUUUAAUCAGUGUGUAACAUUAGGGAGGACUUGAAAGAGCCACCACAUUUUCACCGAGGCCACGCGGAGUACGAUCGAGUGUACAGUGAACAAUGCUAGGGAGAGCUGCCUAUAUGGAAGAGCCCUAAUGUGUAAAAUUAAUUUUAGUAGUGCUAUCCCCAUGUGAUUUUAAUAGCUUCUUAGGAGAAUGACAAAAAAAAAAAAAAAAAAAAAAAAAAAAAAAAA	CUGCCCUAGUCUAGCUGAAGCU
NC_045512.2	150	158	153	158	2.44	hsa-miR-106a-3p_MIMAT0004517	11	19	11	16	1.73	-4.67	-8.84	-0.547816	AGUAGUGCU&AGCACUUCU	((.((((((&)))))).))	CAAUCUUUAAUCAGUGUGUAACAUUAGGGAGGACUUGAAAGAGCCACCACAUUUUCACCGAGGCCACGCGGAGUACGAUCGAGUGUACAGUGAACAAUGCUAGGGAGAGCUGCCUAUAUGGAAGAGCCCUAAUGUGUAAAAUUAAUUUUAGUAGUGCUAUCCCCAUGUGAUUUUAAUAGCUUCUUAGGAGAAUGACAAAAAAAAAAAAAAAAAAAAAAAAAAAAAAAAA	CUGCAAUGUAAGCACUUCUUAC
NC_045512.2	83	95	90	95	3.41	hsa-miR-299-5p_MIMAT0002890	3	16	3	8	1.22	-4.67	-9.3	-0.547816	GUGUACAGUGAAC&GUUUACCGUCCCAC	(((.((.((((((&)))))).))..)))	CAAUCUUUAAUCAGUGUGUAACAUUAGGGAGGACUUGAAAGAGCCACCACAUUUUCACCGAGGCCACGCGGAGUACGAUCGAGUGUACAGUGAACAAUGCUAGGGAGAGCUGCCUAUAUGGAAGAGCCCUAAUGUGUAAAAUUAAUUUUAGUAGUGCUAUCCCCAUGUGAUUUUAAUAGCUUCUUAGGAGAAUGACAAAAAAAAAAAAAAAAAAAAAAAAAAAAAAAAA	UGGUUUACCGUCCCACAUACAU
NC_045512.2	191	197	191	196	0.57	hsa-miR-433-5p_MIMAT0026554	12	18	13	18	1.93	-4.67	-7.17	-0.547816	AAUGACA&UGUCAUU	(((((((&)))))))	CAAUCUUUAAUCAGUGUGUAACAUUAGGGAGGACUUGAAAGAGCCACCACAUUUUCACCGAGGCCACGCGGAGUACGAUCGAGUGUACAGUGAACAAUGCUAGGGAGAGCUGCCUAUAUGGAAGAGCCCUAAUGUGUAAAAUUAAUUUUAGUAGUGCUAUCCCCAUGUGAUUUUAAUAGCUUCUUAGGAGAAUGACAAAAAAAAAAAAAAAAAAAAAAAAAAAAAAAAA	UACGGUGAGCCUGUCAUUAUUC
NC_045512.2	191	197	191	196	0.57	hsa-miR-34b-5p_MIMAT0000685	8	14	9	14	2.05	-4.66	-7.28	-0.543807	AAUGACA&UGUCAUU	(((((((&)))))))	CAAUCUUUAAUCAGUGUGUAACAUUAGGGAGGACUUGAAAGAGCCACCACAUUUUCACCGAGGCCACGCGGAGUACGAUCGAGUGUACAGUGAACAAUGCUAGGGAGAGCUGCCUAUAUGGAAGAGCCCUAAUGUGUAAAAUUAAUUUUAGUAGUGCUAUCCCCAUGUGAUUUUAAUAGCUUCUUAGGAGAAUGACAAAAAAAAAAAAAAAAAAAAAAAAAAAAAAAAA	UAGGCAGUGUCAUUAGCUGAUUG
NC_045512.2	26	32	27	32	3.54	hsa-miR-518e-3p_MIMAT0002861	7	13	7	12	1.95	-4.65	-10.14	-0.548463	AGGGAGG&CUUCCCU	(((((((&)))))))	CAAUCUUUAAUCAGUGUGUAACAUUAGGGAGGACUUGAAAGAGCCACCACAUUUUCACCGAGGCCACGCGGAGUACGAUCGAGUGUACAGUGAACAAUGCUAGGGAGAGCUGCCUAUAUGGAAGAGCCCUAAUGUGUAAAAUUAAUUUUAGUAGUGCUAUCCCCAUGUGAUUUUAAUAGCUUCUUAGGAGAAUGACAAAAAAAAAAAAAAAAAAAAAAAAAAAAAAAAA	AAAGCGCUUCCCUUCAGAGUG
NC_045512.2	83	88	83	88	2.65	hsa-miR-126-5p_MIMAT0000444	15	20	15	20	0.57	-4.64	-7.86	-0.547283	GUGUAC&GUACGC	((((((&))))))	CAAUCUUUAAUCAGUGUGUAACAUUAGGGAGGACUUGAAAGAGCCACCACAUUUUCACCGAGGCCACGCGGAGUACGAUCGAGUGUACAGUGAACAAUGCUAGGGAGAGCUGCCUAUAUGGAAGAGCCCUAAUGUGUAAAAUUAAUUUUAGUAGUGCUAUCCCCAUGUGAUUUUAAUAGCUUCUUAGGAGAAUGACAAAAAAAAAAAAAAAAAAAAAAAAAAAAAAAAA	CAUUAUUACUUUUGGUACGCG
NC_045512.2	100	112	106	111	4.16	hsa-miR-4786-3p_MIMAT0019955	7	20	8	13	4.68	-4.63	-13.47	-0.543124	CUAGGGAGAGCUG&CAGCUCUGGUCUGG	((((..(((((((&)))))))...))))	CAAUCUUUAAUCAGUGUGUAACAUUAGGGAGGACUUGAAAGAGCCACCACAUUUUCACCGAGGCCACGCGGAGUACGAUCGAGUGUACAGUGAACAAUGCUAGGGAGAGCUGCCUAUAUGGAAGAGCCCUAAUGUGUAAAAUUAAUUUUAGUAGUGCUAUCCCCAUGUGAUUUUAAUAGCUUCUUAGGAGAAUGACAAAAAAAAAAAAAAAAAAAAAAAAAAAAAAAAA	UGAAGCCAGCUCUGGUCUGGGC
NC_045512.2	120	138	133	138	3.81	hsa-let-7a-3p_MIMAT0004481	2	21	2	7	0.27	-4.62	-8.7	-0.544924	GGAAGAGCCCUAAUGUGUA&UAUACAAUCUACUGUCUUUC	((((((.......((((((&))))))........))))))	CAAUCUUUAAUCAGUGUGUAACAUUAGGGAGGACUUGAAAGAGCCACCACAUUUUCACCGAGGCCACGCGGAGUACGAUCGAGUGUACAGUGAACAAUGCUAGGGAGAGCUGCCUAUAUGGAAGAGCCCUAAUGUGUAAAAUUAAUUUUAGUAGUGCUAUCCCCAUGUGAUUUUAAUAGCUUCUUAGGAGAAUGACAAAAAAAAAAAAAAAAAAAAAAAAAAAAAAAAA	CUAUACAAUCUACUGUCUUUC
NC_045512.2	157	162	157	162	2.61	hsa-miR-197-5p_MIMAT0022691	2	7	2	7	0.16	-4.62	-7.39	-0.539139	CUAUCC&GGGUAG	((((((&))))))	CAAUCUUUAAUCAGUGUGUAACAUUAGGGAGGACUUGAAAGAGCCACCACAUUUUCACCGAGGCCACGCGGAGUACGAUCGAGUGUACAGUGAACAAUGCUAGGGAGAGCUGCCUAUAUGGAAGAGCCCUAAUGUGUAAAAUUAAUUUUAGUAGUGCUAUCCCCAUGUGAUUUUAAUAGCUUCUUAGGAGAAUGACAAAAAAAAAAAAAAAAAAAAAAAAAAAAAAAAA	CGGGUAGAGAGGGCAGUGGGAGG
NC_045512.2	125	132	127	132	2.47	hsa-miR-6855-5p_MIMAT0027610	1	8	1	6	2.75	-4.62	-9.84	-0.533944	AGCCCUAA&UUGGGGUU	((((((((&))))))))	CAAUCUUUAAUCAGUGUGUAACAUUAGGGAGGACUUGAAAGAGCCACCACAUUUUCACCGAGGCCACGCGGAGUACGAUCGAGUGUACAGUGAACAAUGCUAGGGAGAGCUGCCUAUAUGGAAGAGCCCUAAUGUGUAAAAUUAAUUUUAGUAGUGCUAUCCCCAUGUGAUUUUAAUAGCUUCUUAGGAGAAUGACAAAAAAAAAAAAAAAAAAAAAAAAAAAAAAAAA	UUGGGGUUUGGGGUGCAGACAUUGC
NC_045512.2	9	30	9	14	4.38	hsa-miR-361-3p_MIMAT0004682	1	22	17	22	2.91	-4.61	-11.9	-0.537972	AAUCAGUGUGUAACAUUAGGGA&UCCCCCAGGUGUGAUUCUGAUU	((((((......((....((((&))))....))......))))))	CAAUCUUUAAUCAGUGUGUAACAUUAGGGAGGACUUGAAAGAGCCACCACAUUUUCACCGAGGCCACGCGGAGUACGAUCGAGUGUACAGUGAACAAUGCUAGGGAGAGCUGCCUAUAUGGAAGAGCCCUAAUGUGUAAAAUUAAUUUUAGUAGUGCUAUCCCCAUGUGAUUUUAAUAGCUUCUUAGGAGAAUGACAAAAAAAAAAAAAAAAAAAAAAAAAAAAAAAAA	UCCCCCAGGUGUGAUUCUGAUUU
NC_045512.2	107	113	108	113	3.33	hsa-miR-597-3p_MIMAT0026619	11	17	11	16	2.09	-4.61	-10.03	-0.537972	GAGCUGC&GUGGCUC	(((((((&)))))))	CAAUCUUUAAUCAGUGUGUAACAUUAGGGAGGACUUGAAAGAGCCACCACAUUUUCACCGAGGCCACGCGGAGUACGAUCGAGUGUACAGUGAACAAUGCUAGGGAGAGCUGCCUAUAUGGAAGAGCCCUAAUGUGUAAAAUUAAUUUUAGUAGUGCUAUCCCCAUGUGAUUUUAAUAGCUUCUUAGGAGAAUGACAAAAAAAAAAAAAAAAAAAAAAAAAAAAAAAAA	UGGUUCUCUUGUGGCUCAAGCGU
NC_045512.2	39	48	39	44	1.83	hsa-miR-125a-3p_MIMAT0004602	4	15	10	15	4.4	-4.6	-10.83	-0.539604	AAGAGCCACC&GGUGAGGUUCUU	((((((((((&))))..))))))	CAAUCUUUAAUCAGUGUGUAACAUUAGGGAGGACUUGAAAGAGCCACCACAUUUUCACCGAGGCCACGCGGAGUACGAUCGAGUGUACAGUGAACAAUGCUAGGGAGAGCUGCCUAUAUGGAAGAGCCCUAAUGUGUAAAAUUAAUUUUAGUAGUGCUAUCCCCAUGUGAUUUUAAUAGCUUCUUAGGAGAAUGACAAAAAAAAAAAAAAAAAAAAAAAAAAAAAAAAA	ACAGGUGAGGUUCUUGGGAGCC
NC_045512.2	102	114	103	108	4.19	hsa-miR-376a-2-5p_MIMAT0022928	1	13	7	12	2.81	-4.58	-11.58	-0.540206	AGGGAGAGCUGCC&GGUAGAUUUUCCU	(((((((..((((&))))..)))))))	CAAUCUUUAAUCAGUGUGUAACAUUAGGGAGGACUUGAAAGAGCCACCACAUUUUCACCGAGGCCACGCGGAGUACGAUCGAGUGUACAGUGAACAAUGCUAGGGAGAGCUGCCUAUAUGGAAGAGCCCUAAUGUGUAAAAUUAAUUUUAGUAGUGCUAUCCCCAUGUGAUUUUAAUAGCUUCUUAGGAGAAUGACAAAAAAAAAAAAAAAAAAAAAAAAAAAAAAAAA	GGUAGAUUUUCCUUCUAUGGU
NC_045512.2	121	126	121	126	3.05	hsa-miR-6734-3p_MIMAT0027370	12	17	12	17	0.01	-4.58	-7.64	-0.534471	GAAGAG&CUCUUC	((((((&))))))	CAAUCUUUAAUCAGUGUGUAACAUUAGGGAGGACUUGAAAGAGCCACCACAUUUUCACCGAGGCCACGCGGAGUACGAUCGAGUGUACAGUGAACAAUGCUAGGGAGAGCUGCCUAUAUGGAAGAGCCCUAAUGUGUAAAAUUAAUUUUAGUAGUGCUAUCCCCAUGUGAUUUUAAUAGCUUCUUAGGAGAAUGACAAAAAAAAAAAAAAAAAAAAAAAAAAAAAAAAA	CCCUUCCCUCACUCUUCUCUCAG
NC_045512.2	104	114	104	109	4.13	hsa-miR-3688-5p_MIMAT0019223	4	17	12	17	2.73	-4.57	-11.43	-0.539027	GGAGAGCUGCC&GGCAAAGUCUUUCC	((((((.((((&))))....))))))	CAAUCUUUAAUCAGUGUGUAACAUUAGGGAGGACUUGAAAGAGCCACCACAUUUUCACCGAGGCCACGCGGAGUACGAUCGAGUGUACAGUGAACAAUGCUAGGGAGAGCUGCCUAUAUGGAAGAGCCCUAAUGUGUAAAAUUAAUUUUAGUAGUGCUAUCCCCAUGUGAUUUUAAUAGCUUCUUAGGAGAAUGACAAAAAAAAAAAAAAAAAAAAAAAAAAAAAAAAA	AGUGGCAAAGUCUUUCCAUAU
NC_045512.2	69	87	82	87	5.72	hsa-miR-449c-3p_MIMAT0013771	9	22	9	14	2.31	-4.56	-12.59	-0.532137	CGGAGUACGAUCGAGUGUA&UGCACUCCUCUCUG	(((((.......(((((((&)))))))..)))))	CAAUCUUUAAUCAGUGUGUAACAUUAGGGAGGACUUGAAAGAGCCACCACAUUUUCACCGAGGCCACGCGGAGUACGAUCGAGUGUACAGUGAACAAUGCUAGGGAGAGCUGCCUAUAUGGAAGAGCCCUAAUGUGUAAAAUUAAUUUUAGUAGUGCUAUCCCCAUGUGAUUUUAAUAGCUUCUUAGGAGAAUGACAAAAAAAAAAAAAAAAAAAAAAAAAAAAAAAAA	UUGCUAGUUGCACUCCUCUCUGU
NC_045512.2	81	87	81	86	2.74	hsa-miR-4796-5p_MIMAT0019970	5	11	6	11	0.03	-4.56	-7.33	-0.534912	GAGUGUA&UAUACUC	(((((((&)))))))	CAAUCUUUAAUCAGUGUGUAACAUUAGGGAGGACUUGAAAGAGCCACCACAUUUUCACCGAGGCCACGCGGAGUACGAUCGAGUGUACAGUGAACAAUGCUAGGGAGAGCUGCCUAUAUGGAAGAGCCCUAAUGUGUAAAAUUAAUUUUAGUAGUGCUAUCCCCAUGUGAUUUUAAUAGCUUCUUAGGAGAAUGACAAAAAAAAAAAAAAAAAAAAAAAAAAAAAAAAA	UGUCUAUACUCUGUCACUUUAC
NC_045512.2	2	19	2	7	2.58	hsa-miR-500a-3p_MIMAT0002871	1	19	14	19	2.65	-4.56	-9.79	-0.534912	AAUCUUUAAUCAGUGUGU&AUGCACCUGGGCAAGGAUU	(((((((...((((((((&)))))).))...)))))))	CAAUCUUUAAUCAGUGUGUAACAUUAGGGAGGACUUGAAAGAGCCACCACAUUUUCACCGAGGCCACGCGGAGUACGAUCGAGUGUACAGUGAACAAUGCUAGGGAGAGCUGCCUAUAUGGAAGAGCCCUAAUGUGUAAAAUUAAUUUUAGUAGUGCUAUCCCCAUGUGAUUUUAAUAGCUUCUUAGGAGAAUGACAAAAAAAAAAAAAAAAAAAAAAAAAAAAAAAAA	AUGCACCUGGGCAAGGAUUCUG
NC_045512.2	144	165	146	151	3.37	hsa-miR-6834-5p_MIMAT0027568	2	16	9	14	0.42	-4.56	-8.35	-0.537847	AAUUUUAGUAGUGCUAUCCCCA&UGAGGGACUGGGAUU	((((((((........((((((&)).))))))))))))	CAAUCUUUAAUCAGUGUGUAACAUUAGGGAGGACUUGAAAGAGCCACCACAUUUUCACCGAGGCCACGCGGAGUACGAUCGAGUGUACAGUGAACAAUGCUAGGGAGAGCUGCCUAUAUGGAAGAGCCCUAAUGUGUAAAAUUAAUUUUAGUAGUGCUAUCCCCAUGUGAUUUUAAUAGCUUCUUAGGAGAAUGACAAAAAAAAAAAAAAAAAAAAAAAAAAAAAAAAA	GUGAGGGACUGGGAUUUGUGG
NC_045512.2	179	187	179	184	3.02	hsa-miR-7161-5p_MIMAT0028232	7	16	11	16	1.04	-4.56	-8.62	-0.532137	GCUUCUUAG&CUGUAGAGGC	((((((.((&))..))))))	CAAUCUUUAAUCAGUGUGUAACAUUAGGGAGGACUUGAAAGAGCCACCACAUUUUCACCGAGGCCACGCGGAGUACGAUCGAGUGUACAGUGAACAAUGCUAGGGAGAGCUGCCUAUAUGGAAGAGCCCUAAUGUGUAAAAUUAAUUUUAGUAGUGCUAUCCCCAUGUGAUUUUAAUAGCUUCUUAGGAGAAUGACAAAAAAAAAAAAAAAAAAAAAAAAAAAAAAAAA	UAAAGACUGUAGAGGCAACUGGU
NC_045512.2	165	173	165	170	2.32	hsa-miR-370-5p_MIMAT0026483	2	10	5	10	1.11	-4.55	-7.98	-0.533739	AUGUGAUUU&AGGUCACGU	(((((((((&)))))))))	CAAUCUUUAAUCAGUGUGUAACAUUAGGGAGGACUUGAAAGAGCCACCACAUUUUCACCGAGGCCACGCGGAGUACGAUCGAGUGUACAGUGAACAAUGCUAGGGAGAGCUGCCUAUAUGGAAGAGCCCUAAUGUGUAAAAUUAAUUUUAGUAGUGCUAUCCCCAUGUGAUUUUAAUAGCUUCUUAGGAGAAUGACAAAAAAAAAAAAAAAAAAAAAAAAAAAAAAAAA	CAGGUCACGUCUCUGCAGUUAC
NC_045512.2	160	165	160	165	1.63	hsa-miR-1343-5p_MIMAT0027038	1	6	1	6	3.91	-4.54	-10.08	-0.532566	UCCCCA&UGGGGA	((((((&))))))	CAAUCUUUAAUCAGUGUGUAACAUUAGGGAGGACUUGAAAGAGCCACCACAUUUUCACCGAGGCCACGCGGAGUACGAUCGAGUGUACAGUGAACAAUGCUAGGGAGAGCUGCCUAUAUGGAAGAGCCCUAAUGUGUAAAAUUAAUUUUAGUAGUGCUAUCCCCAUGUGAUUUUAAUAGCUUCUUAGGAGAAUGACAAAAAAAAAAAAAAAAAAAAAAAAAAAAAAAAA	UGGGGAGCGGCCCCCGGGUGGG
NC_045512.2	104	130	125	130	10.86	hsa-miR-296-3p_MIMAT0004679	2	22	2	7	6.88	-4.54	-22.28	-0.532566	GGAGAGCUGCCUAUAUGGAAGAGCCCU&AGGGUUGGGUGGAGGCUCUCC	(((((((..((..........((((((&))))))....))..)))))))	CAAUCUUUAAUCAGUGUGUAACAUUAGGGAGGACUUGAAAGAGCCACCACAUUUUCACCGAGGCCACGCGGAGUACGAUCGAGUGUACAGUGAACAAUGCUAGGGAGAGCUGCCUAUAUGGAAGAGCCCUAAUGUGUAAAAUUAAUUUUAGUAGUGCUAUCCCCAUGUGAUUUUAAUAGCUUCUUAGGAGAAUGACAAAAAAAAAAAAAAAAAAAAAAAAAAAAAAAAA	GAGGGUUGGGUGGAGGCUCUCC
NC_045512.2	65	76	67	72	4.07	hsa-miR-323b-5p_MIMAT0001630	3	15	7	12	3.26	-4.53	-11.86	-0.528636	CACGCGGAGUAC&GUUGUCCGUGGUG	((((((((..((&))..)))))).))	CAAUCUUUAAUCAGUGUGUAACAUUAGGGAGGACUUGAAAGAGCCACCACAUUUUCACCGAGGCCACGCGGAGUACGAUCGAGUGUACAGUGAACAAUGCUAGGGAGAGCUGCCUAUAUGGAAGAGCCCUAAUGUGUAAAAUUAAUUUUAGUAGUGCUAUCCCCAUGUGAUUUUAAUAGCUUCUUAGGAGAAUGACAAAAAAAAAAAAAAAAAAAAAAAAAAAAAAAAA	AGGUUGUCCGUGGUGAGUUCGCA
NC_045512.2	90	95	90	95	1.31	hsa-miR-323b-5p_MIMAT0001630	17	22	17	22	2.37	-4.52	-8.2	-0.527469	GUGAAC&GUUCGC	((((((&))))))	CAAUCUUUAAUCAGUGUGUAACAUUAGGGAGGACUUGAAAGAGCCACCACAUUUUCACCGAGGCCACGCGGAGUACGAUCGAGUGUACAGUGAACAAUGCUAGGGAGAGCUGCCUAUAUGGAAGAGCCCUAAUGUGUAAAAUUAAUUUUAGUAGUGCUAUCCCCAUGUGAUUUUAAUAGCUUCUUAGGAGAAUGACAAAAAAAAAAAAAAAAAAAAAAAAAAAAAAAAA	AGGUUGUCCGUGGUGAGUUCGCA
NC_045512.2	62	75	70	75	4.17	hsa-miR-138-1-3p_MIMAT0004607	3	22	3	8	0.73	-4.51	-9.41	-0.529047	GGCCACGCGGAGUA&UACUUCACAACACCAGGGCC	((((....((((((&))))))..........))))	CAAUCUUUAAUCAGUGUGUAACAUUAGGGAGGACUUGAAAGAGCCACCACAUUUUCACCGAGGCCACGCGGAGUACGAUCGAGUGUACAGUGAACAAUGCUAGGGAGAGCUGCCUAUAUGGAAGAGCCCUAAUGUGUAAAAUUAAUUUUAGUAGUGCUAUCCCCAUGUGAUUUUAAUAGCUUCUUAGGAGAAUGACAAAAAAAAAAAAAAAAAAAAAAAAAAAAAAAAA	GCUACUUCACAACACCAGGGCC
NC_045512.2	151	158	153	158	2.37	hsa-miR-2277-5p_MIMAT0017352	12	19	12	17	3.62	-4.51	-10.5	-0.523702	GUAGUGCU&AGCGCUGC	((((((((&))))))))	CAAUCUUUAAUCAGUGUGUAACAUUAGGGAGGACUUGAAAGAGCCACCACAUUUUCACCGAGGCCACGCGGAGUACGAUCGAGUGUACAGUGAACAAUGCUAGGGAGAGCUGCCUAUAUGGAAGAGCCCUAAUGUGUAAAAUUAAUUUUAGUAGUGCUAUCCCCAUGUGAUUUUAAUAGCUUCUUAGGAGAAUGACAAAAAAAAAAAAAAAAAAAAAAAAAAAAAAAAA	AGCGCGGGCUGAGCGCUGCCAGUC
NC_045512.2	148	154	148	153	1.8	hsa-miR-4684-5p_MIMAT0019769	5	11	6	11	0.37	-4.51	-6.68	-0.529047	UUAGUAG&CUACUGA	(((((((&)))))))	CAAUCUUUAAUCAGUGUGUAACAUUAGGGAGGACUUGAAAGAGCCACCACAUUUUCACCGAGGCCACGCGGAGUACGAUCGAGUGUACAGUGAACAAUGCUAGGGAGAGCUGCCUAUAUGGAAGAGCCCUAAUGUGUAAAAUUAAUUUUAGUAGUGCUAUCCCCAUGUGAUUUUAAUAGCUUCUUAGGAGAAUGACAAAAAAAAAAAAAAAAAAAAAAAAAAAAAAAAA	CUCUCUACUGACUUGCAACAUA
NC_045512.2	94	100	95	100	1.7	hsa-miR-374a-3p_MIMAT0004688	12	18	12	17	0.22	-4.5	-6.42	-0.527874	ACAAUGC&GUAUUGU	(((((((&)))))))	CAAUCUUUAAUCAGUGUGUAACAUUAGGGAGGACUUGAAAGAGCCACCACAUUUUCACCGAGGCCACGCGGAGUACGAUCGAGUGUACAGUGAACAAUGCUAGGGAGAGCUGCCUAUAUGGAAGAGCCCUAAUGUGUAAAAUUAAUUUUAGUAGUGCUAUCCCCAUGUGAUUUUAAUAGCUUCUUAGGAGAAUGACAAAAAAAAAAAAAAAAAAAAAAAAAAAAAAAAA	CUUAUCAGAUUGUAUUGUAAUU
NC_045512.2	38	49	38	43	2.15	hsa-miR-655-3p_MIMAT0003331	9	22	17	22	0.52	-4.49	-7.16	-0.526701	AAAGAGCCACCA&UGGUUAACCUCUUU	((((((..((((&))))....))))))	CAAUCUUUAAUCAGUGUGUAACAUUAGGGAGGACUUGAAAGAGCCACCACAUUUUCACCGAGGCCACGCGGAGUACGAUCGAGUGUACAGUGAACAAUGCUAGGGAGAGCUGCCUAUAUGGAAGAGCCCUAAUGUGUAAAAUUAAUUUUAGUAGUGCUAUCCCCAUGUGAUUUUAAUAGCUUCUUAGGAGAAUGACAAAAAAAAAAAAAAAAAAAAAAAAAAAAAAAAA	AUAAUACAUGGUUAACCUCUUU
NC_045512.2	120	138	133	138	3.81	hsa-let-7f-2-3p_MIMAT0004487	2	21	2	7	2.07	-4.48	-10.36	-0.525528	GGAAGAGCCCUAAUGUGUA&UAUACAGUCUACUGUCUUUC	((((((.......((((((&))))))........))))))	CAAUCUUUAAUCAGUGUGUAACAUUAGGGAGGACUUGAAAGAGCCACCACAUUUUCACCGAGGCCACGCGGAGUACGAUCGAGUGUACAGUGAACAAUGCUAGGGAGAGCUGCCUAUAUGGAAGAGCCCUAAUGUGUAAAAUUAAUUUUAGUAGUGCUAUCCCCAUGUGAUUUUAAUAGCUUCUUAGGAGAAUGACAAAAAAAAAAAAAAAAAAAAAAAAAAAAAAAAA	CUAUACAGUCUACUGUCUUUCC
NC_045512.2	17	22	17	22	0.96	hsa-miR-1537-3p_MIMAT0007399	12	17	12	17	0.62	-4.47	-6.05	-0.524355	UGUAAC&GUUACA	((((((&))))))	CAAUCUUUAAUCAGUGUGUAACAUUAGGGAGGACUUGAAAGAGCCACCACAUUUUCACCGAGGCCACGCGGAGUACGAUCGAGUGUACAGUGAACAAUGCUAGGGAGAGCUGCCUAUAUGGAAGAGCCCUAAUGUGUAAAAUUAAUUUUAGUAGUGCUAUCCCCAUGUGAUUUUAAUAGCUUCUUAGGAGAAUGACAAAAAAAAAAAAAAAAAAAAAAAAAAAAAAAAA	AAAACCGUCUAGUUACAGUUGU
NC_045512.2	99	105	100	105	4.57	hsa-miR-1287-3p_MIMAT0026738	1	7	1	6	0.17	-4.46	-9.2	-0.523182	GCUAGGG&CUCUAGC	(((((((&)))))))	CAAUCUUUAAUCAGUGUGUAACAUUAGGGAGGACUUGAAAGAGCCACCACAUUUUCACCGAGGCCACGCGGAGUACGAUCGAGUGUACAGUGAACAAUGCUAGGGAGAGCUGCCUAUAUGGAAGAGCCCUAAUGUGUAAAAUUAAUUUUAGUAGUGCUAUCCCCAUGUGAUUUUAAUAGCUUCUUAGGAGAAUGACAAAAAAAAAAAAAAAAAAAAAAAAAAAAAAAAA	CUCUAGCCACAGAUGCAGUGAU
NC_045512.2	141	159	154	159	2.74	hsa-miR-29b-3p_MIMAT0000100	1	20	1	6	2.24	-4.46	-9.44	-0.520468	AUUAAUUUUAGUAGUGCUA&UAGCACCAUUUGAAAUCAGU	(((.((((((...((((((&))))))....)))))).)))	CAAUCUUUAAUCAGUGUGUAACAUUAGGGAGGACUUGAAAGAGCCACCACAUUUUCACCGAGGCCACGCGGAGUACGAUCGAGUGUACAGUGAACAAUGCUAGGGAGAGCUGCCUAUAUGGAAGAGCCCUAAUGUGUAAAAUUAAUUUUAGUAGUGCUAUCCCCAUGUGAUUUUAAUAGCUUCUUAGGAGAAUGACAAAAAAAAAAAAAAAAAAAAAAAAAAAAAAAAA	UAGCACCAUUUGAAAUCAGUGUU
NC_045512.2	100	107	100	105	3.99	hsa-miR-3157-3p_MIMAT0019210	1	9	4	9	1.41	-4.46	-9.86	-0.523182	CUAGGGAG&CUGCCCUAG	((((((((&)).))))))	CAAUCUUUAAUCAGUGUGUAACAUUAGGGAGGACUUGAAAGAGCCACCACAUUUUCACCGAGGCCACGCGGAGUACGAUCGAGUGUACAGUGAACAAUGCUAGGGAGAGCUGCCUAUAUGGAAGAGCCCUAAUGUGUAAAAUUAAUUUUAGUAGUGCUAUCCCCAUGUGAUUUUAAUAGCUUCUUAGGAGAAUGACAAAAAAAAAAAAAAAAAAAAAAAAAAAAAAAAA	CUGCCCUAGUCUAGCUGAAGCU
NC_045512.2	103	111	106	111	4.06	hsa-miR-208a-5p_MIMAT0026474	2	13	2	7	1.72	-4.45	-10.23	-0.522009	GGGAGAGCU&AGCUUUUGGCCC	(((((((((&))))))...)))	CAAUCUUUAAUCAGUGUGUAACAUUAGGGAGGACUUGAAAGAGCCACCACAUUUUCACCGAGGCCACGCGGAGUACGAUCGAGUGUACAGUGAACAAUGCUAGGGAGAGCUGCCUAUAUGGAAGAGCCCUAAUGUGUAAAAUUAAUUUUAGUAGUGCUAUCCCCAUGUGAUUUUAAUAGCUUCUUAGGAGAAUGACAAAAAAAAAAAAAAAAAAAAAAAAAAAAAAAAA	GAGCUUUUGGCCCGGGUUAUAC
NC_045512.2	151	162	157	162	2.97	hsa-miR-363-5p_MIMAT0003385	2	17	2	7	1.7	-4.45	-9.12	-0.522009	GUAGUGCUAUCC&GGGUGGAUCACGAUGC	((((((((((((&))))))..)))..)))	CAAUCUUUAAUCAGUGUGUAACAUUAGGGAGGACUUGAAAGAGCCACCACAUUUUCACCGAGGCCACGCGGAGUACGAUCGAGUGUACAGUGAACAAUGCUAGGGAGAGCUGCCUAUAUGGAAGAGCCCUAAUGUGUAAAAUUAAUUUUAGUAGUGCUAUCCCCAUGUGAUUUUAAUAGCUUCUUAGGAGAAUGACAAAAAAAAAAAAAAAAAAAAAAAAAAAAAAAAA	CGGGUGGAUCACGAUGCAAUUU
NC_045512.2	181	196	187	192	4.6	hsa-miR-145-5p_MIMAT0000437	1	18	7	12	1.94	-4.43	-10.97	-0.516967	UUCUUAGGAGAAUGAC&GUCCAGUUUUCCCAGGAA	(((((.((((((((((&)).)).)))))).)))))	CAAUCUUUAAUCAGUGUGUAACAUUAGGGAGGACUUGAAAGAGCCACCACAUUUUCACCGAGGCCACGCGGAGUACGAUCGAGUGUACAGUGAACAAUGCUAGGGAGAGCUGCCUAUAUGGAAGAGCCCUAAUGUGUAAAAUUAAUUUUAGUAGUGCUAUCCCCAUGUGAUUUUAAUAGCUUCUUAGGAGAAUGACAAAAAAAAAAAAAAAAAAAAAAAAAAAAAAAAA	GUCCAGUUUUCCCAGGAAUCCCU
NC_045512.2	38	49	38	43	2.15	hsa-miR-329-3p_MIMAT0001629	9	22	17	22	0.59	-4.43	-7.17	-0.519662	AAAGAGCCACCA&UGGUUAACCUCUUU	((((((..((((&))))....))))))	CAAUCUUUAAUCAGUGUGUAACAUUAGGGAGGACUUGAAAGAGCCACCACAUUUUCACCGAGGCCACGCGGAGUACGAUCGAGUGUACAGUGAACAAUGCUAGGGAGAGCUGCCUAUAUGGAAGAGCCCUAAUGUGUAAAAUUAAUUUUAGUAGUGCUAUCCCCAUGUGAUUUUAAUAGCUUCUUAGGAGAAUGACAAAAAAAAAAAAAAAAAAAAAAAAAAAAAAAAA	AACACACCUGGUUAACCUCUUU
NC_045512.2	125	137	132	137	2.55	hsa-miR-655-3p_MIMAT0003331	4	13	4	9	0.52	-4.43	-7.5	-0.519662	AGCCCUAAUGUGU&AUACAUGGUU	((((...((((((&))))))))))	CAAUCUUUAAUCAGUGUGUAACAUUAGGGAGGACUUGAAAGAGCCACCACAUUUUCACCGAGGCCACGCGGAGUACGAUCGAGUGUACAGUGAACAAUGCUAGGGAGAGCUGCCUAUAUGGAAGAGCCCUAAUGUGUAAAAUUAAUUUUAGUAGUGCUAUCCCCAUGUGAUUUUAAUAGCUUCUUAGGAGAAUGACAAAAAAAAAAAAAAAAAAAAAAAAAAAAAAAAA	AUAAUACAUGGUUAACCUCUUU
NC_045512.2	111	121	116	121	5.06	hsa-miR-411-5p_MIMAT0003329	8	19	8	13	2.07	-4.42	-11.55	-0.521334	UGCCUAUAUGG&CCGUAUAGCGUA	(((((((((((&)))))))).)))	CAAUCUUUAAUCAGUGUGUAACAUUAGGGAGGACUUGAAAGAGCCACCACAUUUUCACCGAGGCCACGCGGAGUACGAUCGAGUGUACAGUGAACAAUGCUAGGGAGAGCUGCCUAUAUGGAAGAGCCCUAAUGUGUAAAAUUAAUUUUAGUAGUGCUAUCCCCAUGUGAUUUUAAUAGCUUCUUAGGAGAAUGACAAAAAAAAAAAAAAAAAAAAAAAAAAAAAAAAA	UAGUAGACCGUAUAGCGUACG
NC_045512.2	163	168	163	168	2.6	hsa-miR-493-5p_MIMAT0002813	5	10	5	10	0.53	-4.42	-7.55	-0.518489	CCAUGU&ACAUGG	((((((&))))))	CAAUCUUUAAUCAGUGUGUAACAUUAGGGAGGACUUGAAAGAGCCACCACAUUUUCACCGAGGCCACGCGGAGUACGAUCGAGUGUACAGUGAACAAUGCUAGGGAGAGCUGCCUAUAUGGAAGAGCCCUAAUGUGUAAAAUUAAUUUUAGUAGUGCUAUCCCCAUGUGAUUUUAAUAGCUUCUUAGGAGAAUGACAAAAAAAAAAAAAAAAAAAAAAAAAAAAAAAAA	UUGUACAUGGUAGGCUUUCAUU
NC_045512.2	77	90	77	82	3.36	hsa-miR-3144-3p_MIMAT0015015	7	16	11	16	1.4	-4.41	-9.17	-0.517316	GAUCGAGUGUACAG&CUGUUCGGUC	((((((....((((&))))))))))	CAAUCUUUAAUCAGUGUGUAACAUUAGGGAGGACUUGAAAGAGCCACCACAUUUUCACCGAGGCCACGCGGAGUACGAUCGAGUGUACAGUGAACAAUGCUAGGGAGAGCUGCCUAUAUGGAAGAGCCCUAAUGUGUAAAAUUAAUUUUAGUAGUGCUAUCCCCAUGUGAUUUUAAUAGCUUCUUAGGAGAAUGACAAAAAAAAAAAAAAAAAAAAAAAAAAAAAAAAA	AUAUACCUGUUCGGUCUCUUUA
NC_045512.2	72	79	73	78	1.19	hsa-miR-15a-3p_MIMAT0004488	9	16	10	15	0.99	-4.4	-6.58	-0.516143	AGUACGAU&AUUGUGCU	((((((((&))))))))	CAAUCUUUAAUCAGUGUGUAACAUUAGGGAGGACUUGAAAGAGCCACCACAUUUUCACCGAGGCCACGCGGAGUACGAUCGAGUGUACAGUGAACAAUGCUAGGGAGAGCUGCCUAUAUGGAAGAGCCCUAAUGUGUAAAAUUAAUUUUAGUAGUGCUAUCCCCAUGUGAUUUUAAUAGCUUCUUAGGAGAAUGACAAAAAAAAAAAAAAAAAAAAAAAAAAAAAAAAA	CAGGCCAUAUUGUGCUGCCUCA
NC_045512.2	65	71	66	71	2.91	hsa-miR-660-3p_MIMAT0022711	6	12	6	11	2.04	-4.4	-9.35	-0.518975	CACGCGG&CUGUGUG	(((((((&)))))))	CAAUCUUUAAUCAGUGUGUAACAUUAGGGAGGACUUGAAAGAGCCACCACAUUUUCACCGAGGCCACGCGGAGUACGAUCGAGUGUACAGUGAACAAUGCUAGGGAGAGCUGCCUAUAUGGAAGAGCCCUAAUGUGUAAAAUUAAUUUUAGUAGUGCUAUCCCCAUGUGAUUUUAAUAGCUUCUUAGGAGAAUGACAAAAAAAAAAAAAAAAAAAAAAAAAAAAAAAAA	ACCUCCUGUGUGCAUGGAUUA
NC_045512.2	85	91	85	90	2.26	hsa-miR-16-1-3p_MIMAT0004489	10	16	11	16	2.01	-4.38	-8.65	-0.513797	GUACAGU&ACUGUGC	(((((((&)))))))	CAAUCUUUAAUCAGUGUGUAACAUUAGGGAGGACUUGAAAGAGCCACCACAUUUUCACCGAGGCCACGCGGAGUACGAUCGAGUGUACAGUGAACAAUGCUAGGGAGAGCUGCCUAUAUGGAAGAGCCCUAAUGUGUAAAAUUAAUUUUAGUAGUGCUAUCCCCAUGUGAUUUUAAUAGCUUCUUAGGAGAAUGACAAAAAAAAAAAAAAAAAAAAAAAAAAAAAAAAA	CCAGUAUUAACUGUGCUGCUGA
NC_045512.2	70	80	75	80	3.05	hsa-miR-30c-1-3p_MIMAT0004674	10	22	10	15	3.45	-4.38	-10.88	-0.513797	GGAGUACGAUC&GGUUGUUUACUCC	(((((((((((&))))))..)))))	CAAUCUUUAAUCAGUGUGUAACAUUAGGGAGGACUUGAAAGAGCCACCACAUUUUCACCGAGGCCACGCGGAGUACGAUCGAGUGUACAGUGAACAAUGCUAGGGAGAGCUGCCUAUAUGGAAGAGCCCUAAUGUGUAAAAUUAAUUUUAGUAGUGCUAUCCCCAUGUGAUUUUAAUAGCUUCUUAGGAGAAUGACAAAAAAAAAAAAAAAAAAAAAAAAAAAAAAAAA	CUGGGAGAGGGUUGUUUACUCC
NC_045512.2	60	65	60	65	2.45	hsa-miR-329-5p_MIMAT0026555	12	17	12	17	0.31	-4.38	-7.14	-0.511132	GAGGCC&GGUUUC	((((((&))))))	CAAUCUUUAAUCAGUGUGUAACAUUAGGGAGGACUUGAAAGAGCCACCACAUUUUCACCGAGGCCACGCGGAGUACGAUCGAGUGUACAGUGAACAAUGCUAGGGAGAGCUGCCUAUAUGGAAGAGCCCUAAUGUGUAAAAUUAAUUUUAGUAGUGCUAUCCCCAUGUGAUUUUAAUAGCUUCUUAGGAGAAUGACAAAAAAAAAAAAAAAAAAAAAAAAAAAAAAAAA	GAGGUUUUCUGGGUUUCUGUUUC
NC_045512.2	163	168	163	168	2.6	hsa-miR-4659a-3p_MIMAT0019727	12	17	12	17	0.53	-4.38	-7.51	-0.513797	CCAUGU&ACAUGG	((((((&))))))	CAAUCUUUAAUCAGUGUGUAACAUUAGGGAGGACUUGAAAGAGCCACCACAUUUUCACCGAGGCCACGCGGAGUACGAUCGAGUGUACAGUGAACAAUGCUAGGGAGAGCUGCCUAUAUGGAAGAGCCCUAAUGUGUAAAAUUAAUUUUAGUAGUGCUAUCCCCAUGUGAUUUUAAUAGCUUCUUAGGAGAAUGACAAAAAAAAAAAAAAAAAAAAAAAAAAAAAAAAA	UUUCUUCUUAGACAUGGCAACG
NC_045512.2	153	158	153	158	2.25	hsa-miR-20a-3p_MIMAT0004493	12	17	12	17	1.4	-4.37	-8.02	-0.512624	AGUGCU&AGCACU	((((((&))))))	CAAUCUUUAAUCAGUGUGUAACAUUAGGGAGGACUUGAAAGAGCCACCACAUUUUCACCGAGGCCACGCGGAGUACGAUCGAGUGUACAGUGAACAAUGCUAGGGAGAGCUGCCUAUAUGGAAGAGCCCUAAUGUGUAAAAUUAAUUUUAGUAGUGCUAUCCCCAUGUGAUUUUAAUAGCUUCUUAGGAGAAUGACAAAAAAAAAAAAAAAAAAAAAAAAAAAAAAAAA	ACUGCAUUAUGAGCACUUAAAG
NC_045512.2	134	139	134	139	1.12	hsa-miR-25-3p_MIMAT0000081	3	8	3	8	0.33	-4.36	-5.81	-0.511451	GUGUAA&UUGCAC	((((((&))))))	CAAUCUUUAAUCAGUGUGUAACAUUAGGGAGGACUUGAAAGAGCCACCACAUUUUCACCGAGGCCACGCGGAGUACGAUCGAGUGUACAGUGAACAAUGCUAGGGAGAGCUGCCUAUAUGGAAGAGCCCUAAUGUGUAAAAUUAAUUUUAGUAGUGCUAUCCCCAUGUGAUUUUAAUAGCUUCUUAGGAGAAUGACAAAAAAAAAAAAAAAAAAAAAAAAAAAAAAAAA	CAUUGCACUUGUCUCGGUCUGA
NC_045512.2	98	117	112	117	7.5	hsa-miR-4423-3p_MIMAT0018936	1	17	1	6	0.96	-4.36	-12.82	-0.514257	UGCUAGGGAGAGCUGCCUAU&AUAGGCACCAAAAAGCA	((((..((.....(((((((&)))))))))....))))	CAAUCUUUAAUCAGUGUGUAACAUUAGGGAGGACUUGAAAGAGCCACCACAUUUUCACCGAGGCCACGCGGAGUACGAUCGAGUGUACAGUGAACAAUGCUAGGGAGAGCUGCCUAUAUGGAAGAGCCCUAAUGUGUAAAAUUAAUUUUAGUAGUGCUAUCCCCAUGUGAUUUUAAUAGCUUCUUAGGAGAAUGACAAAAAAAAAAAAAAAAAAAAAAAAAAAAAAAAA	AUAGGCACCAAAAAGCAACAA
NC_045512.2	170	183	172	177	2.37	hsa-miR-5187-5p_MIMAT0021117	7	19	12	17	0.09	-4.36	-6.82	-0.511451	AUUUUAAUAGCUUC&GAGGGAUUGAAGU	((((((((..((((&)))).))))))))	CAAUCUUUAAUCAGUGUGUAACAUUAGGGAGGACUUGAAAGAGCCACCACAUUUUCACCGAGGCCACGCGGAGUACGAUCGAGUGUACAGUGAACAAUGCUAGGGAGAGCUGCCUAUAUGGAAGAGCCCUAAUGUGUAAAAUUAAUUUUAGUAGUGCUAUCCCCAUGUGAUUUUAAUAGCUUCUUAGGAGAAUGACAAAAAAAAAAAAAAAAAAAAAAAAAAAAAAAAA	UGGGAUGAGGGAUUGAAGUGGA
NC_045512.2	122	130	125	130	3.26	hsa-miR-30c-1-3p_MIMAT0004674	8	16	8	13	1.26	-4.35	-8.87	-0.510278	AAGAGCCCU&AGGGUUGUU	((.((((((&)))))).))	CAAUCUUUAAUCAGUGUGUAACAUUAGGGAGGACUUGAAAGAGCCACCACAUUUUCACCGAGGCCACGCGGAGUACGAUCGAGUGUACAGUGAACAAUGCUAGGGAGAGCUGCCUAUAUGGAAGAGCCCUAAUGUGUAAAAUUAAUUUUAGUAGUGCUAUCCCCAUGUGAUUUUAAUAGCUUCUUAGGAGAAUGACAAAAAAAAAAAAAAAAAAAAAAAAAAAAAAAAA	CUGGGAGAGGGUUGUUUACUCC
NC_045512.2	182	192	186	191	4.31	hsa-miR-4659a-3p_MIMAT0019727	2	12	3	8	0.57	-4.34	-9.22	-0.509105	UCUUAGGAGAA&UUCUUCUUAGA	(((.(((((((&))))))).)))	CAAUCUUUAAUCAGUGUGUAACAUUAGGGAGGACUUGAAAGAGCCACCACAUUUUCACCGAGGCCACGCGGAGUACGAUCGAGUGUACAGUGAACAAUGCUAGGGAGAGCUGCCUAUAUGGAAGAGCCCUAAUGUGUAAAAUUAAUUUUAGUAGUGCUAUCCCCAUGUGAUUUUAAUAGCUUCUUAGGAGAAUGACAAAAAAAAAAAAAAAAAAAAAAAAAAAAAAAAA	UUUCUUCUUAGACAUGGCAACG
NC_045512.2	70	87	82	87	5.54	hsa-miR-191-3p_MIMAT0001618	3	20	3	8	2.32	-4.32	-12.18	-0.506759	GGAGUACGAUCGAGUGUA&UGCGCUUGGAUUUCGUCC	(((.......((((((((&)))))))).......)))	CAAUCUUUAAUCAGUGUGUAACAUUAGGGAGGACUUGAAAGAGCCACCACAUUUUCACCGAGGCCACGCGGAGUACGAUCGAGUGUACAGUGAACAAUGCUAGGGAGAGCUGCCUAUAUGGAAGAGCCCUAAUGUGUAAAAUUAAUUUUAGUAGUGCUAUCCCCAUGUGAUUUUAAUAGCUUCUUAGGAGAAUGACAAAAAAAAAAAAAAAAAAAAAAAAAAAAAAAAA	GCUGCGCUUGGAUUUCGUCCCC
NC_045512.2	18	29	18	23	3.53	hsa-miR-5586-5p_MIMAT0022287	4	15	10	15	0.86	-4.32	-8.71	-0.506759	GUAACAUUAGGG&CCAGCUUGUUAC	((((((....((&))....))))))	CAAUCUUUAAUCAGUGUGUAACAUUAGGGAGGACUUGAAAGAGCCACCACAUUUUCACCGAGGCCACGCGGAGUACGAUCGAGUGUACAGUGAACAAUGCUAGGGAGAGCUGCCUAUAUGGAAGAGCCCUAAUGUGUAAAAUUAAUUUUAGUAGUGCUAUCCCCAUGUGAUUUUAAUAGCUUCUUAGGAGAAUGACAAAAAAAAAAAAAAAAAAAAAAAAAAAAAAAAA	UAUCCAGCUUGUUACUAUAUGC
NC_045512.2	98	116	111	116	7.39	hsa-miR-1301-5p_MIMAT0026639	6	19	6	11	2.25	-4.31	-13.95	-0.514433	UGCUAGGGAGAGCUGCCUA&UAGGCACCGCAGCA	((((..((.....((((((&))))))))..))))	CAAUCUUUAAUCAGUGUGUAACAUUAGGGAGGACUUGAAAGAGCCACCACAUUUUCACCGAGGCCACGCGGAGUACGAUCGAGUGUACAGUGAACAAUGCUAGGGAGAGCUGCCUAUAUGGAAGAGCCCUAAUGUGUAAAAUUAAUUUUAGUAGUGCUAUCCCCAUGUGAUUUUAAUAGCUUCUUAGGAGAAUGACAAAAAAAAAAAAAAAAAAAAAAAAAAAAAAAAA	CGCUCUAGGCACCGCAGCA
NC_045512.2	65	76	67	72	4.07	hsa-miR-410-5p_MIMAT0026558	3	15	7	12	1.28	-4.31	-9.66	-0.50836	CACGCGGAGUAC&GUUGUCUGUGAUG	((((((((..((&))..)))))).))	CAAUCUUUAAUCAGUGUGUAACAUUAGGGAGGACUUGAAAGAGCCACCACAUUUUCACCGAGGCCACGCGGAGUACGAUCGAGUGUACAGUGAACAAUGCUAGGGAGAGCUGCCUAUAUGGAAGAGCCCUAAUGUGUAAAAUUAAUUUUAGUAGUGCUAUCCCCAUGUGAUUUUAAUAGCUUCUUAGGAGAAUGACAAAAAAAAAAAAAAAAAAAAAAAAAAAAAAAAA	AGGUUGUCUGUGAUGAGUUCG
NC_045512.2	178	183	178	183	1.98	hsa-miR-5001-5p_MIMAT0021021	19	24	19	24	0.34	-4.31	-6.63	-0.500477	AGCUUC&GGAGCU	((((((&))))))	CAAUCUUUAAUCAGUGUGUAACAUUAGGGAGGACUUGAAAGAGCCACCACAUUUUCACCGAGGCCACGCGGAGUACGAUCGAGUGUACAGUGAACAAUGCUAGGGAGAGCUGCCUAUAUGGAAGAGCCCUAAUGUGUAAAAUUAAUUUUAGUAGUGCUAUCCCCAUGUGAUUUUAAUAGCUUCUUAGGAGAAUGACAAAAAAAAAAAAAAAAAAAAAAAAAAAAAAAAA	AGGGCUGGACUCAGCGGCGGAGCU
NC_045512.2	183	197	192	197	4.18	hsa-miR-512-3p_MIMAT0002823	7	19	7	12	2.25	-4.31	-10.74	-0.505586	CUUAGGAGAAUGACA&UGUCAUAGCUGAG	(((((....((((((&))))))..)))))	CAAUCUUUAAUCAGUGUGUAACAUUAGGGAGGACUUGAAAGAGCCACCACAUUUUCACCGAGGCCACGCGGAGUACGAUCGAGUGUACAGUGAACAAUGCUAGGGAGAGCUGCCUAUAUGGAAGAGCCCUAAUGUGUAAAAUUAAUUUUAGUAGUGCUAUCCCCAUGUGAUUUUAAUAGCUUCUUAGGAGAAUGACAAAAAAAAAAAAAAAAAAAAAAAAAAAAAAAAA	AAGUGCUGUCAUAGCUGAGGUC
NC_045512.2	153	158	153	158	2.25	hsa-miR-143-3p_MIMAT0000435	9	14	9	14	1.7	-4.29	-8.24	-0.506001	AGUGCU&AGCACU	((((((&))))))	CAAUCUUUAAUCAGUGUGUAACAUUAGGGAGGACUUGAAAGAGCCACCACAUUUUCACCGAGGCCACGCGGAGUACGAUCGAGUGUACAGUGAACAAUGCUAGGGAGAGCUGCCUAUAUGGAAGAGCCCUAAUGUGUAAAAUUAAUUUUAGUAGUGCUAUCCCCAUGUGAUUUUAAUAGCUUCUUAGGAGAAUGACAAAAAAAAAAAAAAAAAAAAAAAAAAAAAAAAA	UGAGAUGAAGCACUGUAGCUC
NC_045512.2	12	19	13	18	1.71	hsa-miR-31-3p_MIMAT0004504	11	18	12	17	1.47	-4.29	-7.47	-0.50324	CAGUGUGU&ACAUAUUG	((((((((&))))))))	CAAUCUUUAAUCAGUGUGUAACAUUAGGGAGGACUUGAAAGAGCCACCACAUUUUCACCGAGGCCACGCGGAGUACGAUCGAGUGUACAGUGAACAAUGCUAGGGAGAGCUGCCUAUAUGGAAGAGCCCUAAUGUGUAAAAUUAAUUUUAGUAGUGCUAUCCCCAUGUGAUUUUAAUAGCUUCUUAGGAGAAUGACAAAAAAAAAAAAAAAAAAAAAAAAAAAAAAAAA	UGCUAUGCCAACAUAUUGCCAU
NC_045512.2	103	113	108	113	4.12	hsa-miR-27a-3p_MIMAT0000084	7	19	7	12	1.97	-4.27	-10.36	-0.503642	GGGAGAGCUGC&GUGGCUAAGUUCC	((((.((((((&))))))...))))	CAAUCUUUAAUCAGUGUGUAACAUUAGGGAGGACUUGAAAGAGCCACCACAUUUUCACCGAGGCCACGCGGAGUACGAUCGAGUGUACAGUGAACAAUGCUAGGGAGAGCUGCCUAUAUGGAAGAGCCCUAAUGUGUAAAAUUAAUUUUAGUAGUGCUAUCCCCAUGUGAUUUUAAUAGCUUCUUAGGAGAAUGACAAAAAAAAAAAAAAAAAAAAAAAAAAAAAAAAA	UUCACAGUGGCUAAGUUCCGC
NC_045512.2	187	192	187	192	2.54	hsa-miR-26b-3p_MIMAT0004500	5	10	5	10	1.44	-4.27	-8.25	-0.503642	GGAGAA&UUCUCC	((((((&))))))	CAAUCUUUAAUCAGUGUGUAACAUUAGGGAGGACUUGAAAGAGCCACCACAUUUUCACCGAGGCCACGCGGAGUACGAUCGAGUGUACAGUGAACAAUGCUAGGGAGAGCUGCCUAUAUGGAAGAGCCCUAAUGUGUAAAAUUAAUUUUAGUAGUGCUAUCCCCAUGUGAUUUUAAUAGCUUCUUAGGAGAAUGACAAAAAAAAAAAAAAAAAAAAAAAAAAAAAAAAA	CCUGUUCUCCAUUACUUGGCU
NC_045512.2	153	169	156	161	4.58	hsa-miR-410-3p_MIMAT0002171	8	19	12	17	2.15	-4.27	-11	-0.503642	AGUGCUAUCCCCAUGUG&CACAGAUGGCCU	((.((((((....((((&))))))))))))	CAAUCUUUAAUCAGUGUGUAACAUUAGGGAGGACUUGAAAGAGCCACCACAUUUUCACCGAGGCCACGCGGAGUACGAUCGAGUGUACAGUGAACAAUGCUAGGGAGAGCUGCCUAUAUGGAAGAGCCCUAAUGUGUAAAAUUAAUUUUAGUAGUGCUAUCCCCAUGUGAUUUUAAUAGCUUCUUAGGAGAAUGACAAAAAAAAAAAAAAAAAAAAAAAAAAAAAAAAA	AAUAUAACACAGAUGGCCUGU
NC_045512.2	172	188	174	179	4.08	hsa-miR-887-5p_MIMAT0026720	1	18	11	16	1.33	-4.27	-9.68	-0.503642	UUUAAUAGCUUCUUAGG&CUUGGGAGCCCUGUUAGA	((((((((((.((((((&))))))))..))))))))	CAAUCUUUAAUCAGUGUGUAACAUUAGGGAGGACUUGAAAGAGCCACCACAUUUUCACCGAGGCCACGCGGAGUACGAUCGAGUGUACAGUGAACAAUGCUAGGGAGAGCUGCCUAUAUGGAAGAGCCCUAAUGUGUAAAAUUAAUUUUAGUAGUGCUAUCCCCAUGUGAUUUUAAUAGCUUCUUAGGAGAAUGACAAAAAAAAAAAAAAAAAAAAAAAAAAAAAAAAA	CUUGGGAGCCCUGUUAGACUC
NC_045512.2	44	49	44	49	1.1	hsa-miR-188-5p_MIMAT0000457	12	17	12	17	3.19	-4.25	-8.54	-0.501283	CCACCA&UGGUGG	((((((&))))))	CAAUCUUUAAUCAGUGUGUAACAUUAGGGAGGACUUGAAAGAGCCACCACAUUUUCACCGAGGCCACGCGGAGUACGAUCGAGUGUACAGUGAACAAUGCUAGGGAGAGCUGCCUAUAUGGAAGAGCCCUAAUGUGUAAAAUUAAUUUUAGUAGUGCUAUCCCCAUGUGAUUUUAAUAGCUUCUUAGGAGAAUGACAAAAAAAAAAAAAAAAAAAAAAAAAAAAAAAAA	CAUCCCUUGCAUGGUGGAGGG
NC_045512.2	110	115	110	115	2.5	hsa-let-7d-5p_MIMAT0000065	3	8	3	8	0.82	-4.24	-7.56	-0.497374	CUGCCU&AGGUAG	((((((&))))))	CAAUCUUUAAUCAGUGUGUAACAUUAGGGAGGACUUGAAAGAGCCACCACAUUUUCACCGAGGCCACGCGGAGUACGAUCGAGUGUACAGUGAACAAUGCUAGGGAGAGCUGCCUAUAUGGAAGAGCCCUAAUGUGUAAAAUUAAUUUUAGUAGUGCUAUCCCCAUGUGAUUUUAAUAGCUUCUUAGGAGAAUGACAAAAAAAAAAAAAAAAAAAAAAAAAAAAAAAAA	AGAGGUAGUAGGUUGCAUAGUU
NC_045512.2	192	197	192	197	0.57	hsa-miR-513a-5p_MIMAT0002877	13	18	13	18	1.06	-4.24	-5.87	-0.509365	AUGACA&UGUCAU	((((((&))))))	CAAUCUUUAAUCAGUGUGUAACAUUAGGGAGGACUUGAAAGAGCCACCACAUUUUCACCGAGGCCACGCGGAGUACGAUCGAGUGUACAGUGAACAAUGCUAGGGAGAGCUGCCUAUAUGGAAGAGCCCUAAUGUGUAAAAUUAAUUUUAGUAGUGCUAUCCCCAUGUGAUUUUAAUAGCUUCUUAGGAGAAUGACAAAAAAAAAAAAAAAAAAAAAAAAAAAAAAAAA	UUCACAGGGAGGUGUCAU
NC_045512.2	132	155	132	137	2.85	hsa-miR-137-3p_MIMAT0000429	3	21	16	21	1.15	-4.23	-8.23	-0.493627	AUGUGUAAAAUUAAUUUUAGUAGU&AUUGCUUAAGAAUACGCGU	(((((((...(((.....((((((&)))))))))...)))))))	CAAUCUUUAAUCAGUGUGUAACAUUAGGGAGGACUUGAAAGAGCCACCACAUUUUCACCGAGGCCACGCGGAGUACGAUCGAGUGUACAGUGAACAAUGCUAGGGAGAGCUGCCUAUAUGGAAGAGCCCUAAUGUGUAAAAUUAAUUUUAGUAGUGCUAUCCCCAUGUGAUUUUAAUAGCUUCUUAGGAGAAUGACAAAAAAAAAAAAAAAAAAAAAAAAAAAAAAAAA	UUAUUGCUUAAGAAUACGCGUAG
NC_045512.2	70	80	75	80	3.05	hsa-miR-508-3p_MIMAT0002880	2	11	2	7	1.46	-4.23	-8.74	-0.493627	GGAGUACGAUC&GAUUGUAGCC	((..(((((((&))))))).))	CAAUCUUUAAUCAGUGUGUAACAUUAGGGAGGACUUGAAAGAGCCACCACAUUUUCACCGAGGCCACGCGGAGUACGAUCGAGUGUACAGUGAACAAUGCUAGGGAGAGCUGCCUAUAUGGAAGAGCCCUAAUGUGUAAAAUUAAUUUUAGUAGUGCUAUCCCCAUGUGAUUUUAAUAGCUUCUUAGGAGAAUGACAAAAAAAAAAAAAAAAAAAAAAAAAAAAAAAAA	UGAUUGUAGCCUUUUGGAGUAGA
NC_045512.2	25	32	25	30	3.96	hsa-miR-523-3p_MIMAT0002840	8	15	10	15	4.07	-4.23	-12.26	-0.493627	UAGGGAGG&CUUCCCUA	((((((((&))))))))	CAAUCUUUAAUCAGUGUGUAACAUUAGGGAGGACUUGAAAGAGCCACCACAUUUUCACCGAGGCCACGCGGAGUACGAUCGAGUGUACAGUGAACAAUGCUAGGGAGAGCUGCCUAUAUGGAAGAGCCCUAAUGUGUAAAAUUAAUUUUAGUAGUGCUAUCCCCAUGUGAUUUUAAUAGCUUCUUAGGAGAAUGACAAAAAAAAAAAAAAAAAAAAAAAAAAAAAAAAA	GAACGCGCUUCCCUAUAGAGGGU
NC_045512.2	180	187	182	187	3.02	hsa-miR-204-3p_MIMAT0022693	2	9	2	7	2.38	-4.22	-9.62	-0.497745	CUUCUUAG&CUGGGAAG	((((((((&))))))))	CAAUCUUUAAUCAGUGUGUAACAUUAGGGAGGACUUGAAAGAGCCACCACAUUUUCACCGAGGCCACGCGGAGUACGAUCGAGUGUACAGUGAACAAUGCUAGGGAGAGCUGCCUAUAUGGAAGAGCCCUAAUGUGUAAAAUUAAUUUUAGUAGUGCUAUCCCCAUGUGAUUUUAAUAGCUUCUUAGGAGAAUGACAAAAAAAAAAAAAAAAAAAAAAAAAAAAAAAAA	GCUGGGAAGGCAAAGGGACGU
NC_045512.2	178	189	178	183	3.79	hsa-miR-519b-3p_MIMAT0002837	9	22	17	22	1.79	-4.22	-9.8	-0.495028	AGCUUCUUAGGA&UCCUUUUAGAGGUU	(((((((.((((&))))...)))))))	CAAUCUUUAAUCAGUGUGUAACAUUAGGGAGGACUUGAAAGAGCCACCACAUUUUCACCGAGGCCACGCGGAGUACGAUCGAGUGUACAGUGAACAAUGCUAGGGAGAGCUGCCUAUAUGGAAGAGCCCUAAUGUGUAAAAUUAAUUUUAGUAGUGCUAUCCCCAUGUGAUUUUAAUAGCUUCUUAGGAGAAUGACAAAAAAAAAAAAAAAAAAAAAAAAAAAAAAAAA	AAAGUGCAUCCUUUUAGAGGUU
NC_045512.2	103	113	108	113	4.12	hsa-miR-548am-5p_MIMAT0022740	11	22	11	16	1.78	-4.22	-10.12	-0.495028	GGGAGAGCUGC&GCGGUUUUUGCC	((.((((((((&))))))))..))	CAAUCUUUAAUCAGUGUGUAACAUUAGGGAGGACUUGAAAGAGCCACCACAUUUUCACCGAGGCCACGCGGAGUACGAUCGAGUGUACAGUGAACAAUGCUAGGGAGAGCUGCCUAUAUGGAAGAGCCCUAAUGUGUAAAAUUAAUUUUAGUAGUGCUAUCCCCAUGUGAUUUUAAUAGCUUCUUAGGAGAAUGACAAAAAAAAAAAAAAAAAAAAAAAAAAAAAAAAA	AAAAGUAAUUGCGGUUUUUGCC
NC_045512.2	103	113	108	113	4.12	hsa-miR-548o-5p_MIMAT0022738	11	22	11	16	1.78	-4.22	-10.12	-0.495028	GGGAGAGCUGC&GCGGUUUUUGCC	((.((((((((&))))))))..))	CAAUCUUUAAUCAGUGUGUAACAUUAGGGAGGACUUGAAAGAGCCACCACAUUUUCACCGAGGCCACGCGGAGUACGAUCGAGUGUACAGUGAACAAUGCUAGGGAGAGCUGCCUAUAUGGAAGAGCCCUAAUGUGUAAAAUUAAUUUUAGUAGUGCUAUCCCCAUGUGAUUUUAAUAGCUUCUUAGGAGAAUGACAAAAAAAAAAAAAAAAAAAAAAAAAAAAAAAAA	AAAAGUAAUUGCGGUUUUUGCC
NC_045512.2	119	124	119	124	3.02	hsa-miR-3180-5p_MIMAT0015057	1	6	1	6	0.01	-4.21	-7.24	-0.486559	UGGAAG&CUUCCA	((((((&))))))	CAAUCUUUAAUCAGUGUGUAACAUUAGGGAGGACUUGAAAGAGCCACCACAUUUUCACCGAGGCCACGCGGAGUACGAUCGAGUGUACAGUGAACAAUGCUAGGGAGAGCUGCCUAUAUGGAAGAGCCCUAAUGUGUAAAAUUAAUUUUAGUAGUGCUAUCCCCAUGUGAUUUUAAUAGCUUCUUAGGAGAAUGACAAAAAAAAAAAAAAAAAAAAAAAAAAAAAAAAA	CUUCCAGACGCUCCGCCCCACGUCG
NC_045512.2	108	113	108	113	1.44	hsa-miR-548at-5p_MIMAT0022277	11	16	11	16	0.55	-4.21	-6.2	-0.493855	AGCUGC&GCGGUU	((((((&))))))	CAAUCUUUAAUCAGUGUGUAACAUUAGGGAGGACUUGAAAGAGCCACCACAUUUUCACCGAGGCCACGCGGAGUACGAUCGAGUGUACAGUGAACAAUGCUAGGGAGAGCUGCCUAUAUGGAAGAGCCCUAAUGUGUAAAAUUAAUUUUAGUAGUGCUAUCCCCAUGUGAUUUUAAUAGCUUCUUAGGAGAAUGACAAAAAAAAAAAAAAAAAAAAAAAAAAAAAAAAA	AAAAGUUAUUGCGGUUUUGGCU
NC_045512.2	10	17	12	17	2.03	hsa-miR-577_MIMAT0003242	9	16	9	14	0.07	-4.18	-6.28	-0.493027	AUCAGUGU&AUAUUGGU	((((((((&))))))))	CAAUCUUUAAUCAGUGUGUAACAUUAGGGAGGACUUGAAAGAGCCACCACAUUUUCACCGAGGCCACGCGGAGUACGAUCGAGUGUACAGUGAACAAUGCUAGGGAGAGCUGCCUAUAUGGAAGAGCCCUAAUGUGUAAAAUUAAUUUUAGUAGUGCUAUCCCCAUGUGAUUUUAAUAGCUUCUUAGGAGAAUGACAAAAAAAAAAAAAAAAAAAAAAAAAAAAAAAAA	UAGAUAAAAUAUUGGUACCUG
NC_045512.2	153	158	153	158	2.25	hsa-miR-1271-5p_MIMAT0005796	15	20	15	20	1.53	-4.16	-7.94	-0.48799	AGUGCU&AGCACU	((((((&))))))	CAAUCUUUAAUCAGUGUGUAACAUUAGGGAGGACUUGAAAGAGCCACCACAUUUUCACCGAGGCCACGCGGAGUACGAUCGAGUGUACAGUGAACAAUGCUAGGGAGAGCUGCCUAUAUGGAAGAGCCCUAAUGUGUAAAAUUAAUUUUAGUAGUGCUAUCCCCAUGUGAUUUUAAUAGCUUCUUAGGAGAAUGACAAAAAAAAAAAAAAAAAAAAAAAAAAAAAAAAA	CUUGGCACCUAGCAAGCACUCA
NC_045512.2	80	92	87	92	3.23	hsa-miR-106b-3p_MIMAT0004672	4	18	4	9	3.32	-4.16	-10.71	-0.48799	CGAGUGUACAGUG&CACUGUGGGUACUUG	(((((..((((((&))))))....)))))	CAAUCUUUAAUCAGUGUGUAACAUUAGGGAGGACUUGAAAGAGCCACCACAUUUUCACCGAGGCCACGCGGAGUACGAUCGAGUGUACAGUGAACAAUGCUAGGGAGAGCUGCCUAUAUGGAAGAGCCCUAAUGUGUAAAAUUAAUUUUAGUAGUGCUAUCCCCAUGUGAUUUUAAUAGCUUCUUAGGAGAAUGACAAAAAAAAAAAAAAAAAAAAAAAAAAAAAAAAA	CCGCACUGUGGGUACUUGCUGC
NC_045512.2	120	131	126	131	3.5	hsa-miR-1296-3p_MIMAT0026637	4	16	4	9	6.18	-4.16	-13.84	-0.48799	GGAAGAGCCCUA&UGGGGCUUCGACC	((..((((((((&)))))).))..))	CAAUCUUUAAUCAGUGUGUAACAUUAGGGAGGACUUGAAAGAGCCACCACAUUUUCACCGAGGCCACGCGGAGUACGAUCGAGUGUACAGUGAACAAUGCUAGGGAGAGCUGCCUAUAUGGAAGAGCCCUAAUGUGUAAAAUUAAUUUUAGUAGUGCUAUCCCCAUGUGAUUUUAAUAGCUUCUUAGGAGAAUGACAAAAAAAAAAAAAAAAAAAAAAAAAAAAAAAAA	GAGUGGGGCUUCGACCCUAACC
NC_045512.2	17	23	18	23	1	hsa-miR-187-3p_MIMAT0000262	11	17	11	16	1.49	-4.14	-6.63	-0.485644	UGUAACA&UGUUGCA	(((((((&)))))))	CAAUCUUUAAUCAGUGUGUAACAUUAGGGAGGACUUGAAAGAGCCACCACAUUUUCACCGAGGCCACGCGGAGUACGAUCGAGUGUACAGUGAACAAUGCUAGGGAGAGCUGCCUAUAUGGAAGAGCCCUAAUGUGUAAAAUUAAUUUUAGUAGUGCUAUCCCCAUGUGAUUUUAAUAGCUUCUUAGGAGAAUGACAAAAAAAAAAAAAAAAAAAAAAAAAAAAAAAAA	UCGUGUCUUGUGUUGCAGCCGG
NC_045512.2	108	113	108	113	1.44	hsa-miR-210-3p_MIMAT0000267	15	20	15	20	2.68	-4.13	-8.25	-0.484471	AGCUGC&GCGGCU	((((((&))))))	CAAUCUUUAAUCAGUGUGUAACAUUAGGGAGGACUUGAAAGAGCCACCACAUUUUCACCGAGGCCACGCGGAGUACGAUCGAGUGUACAGUGAACAAUGCUAGGGAGAGCUGCCUAUAUGGAAGAGCCCUAAUGUGUAAAAUUAAUUUUAGUAGUGCUAUCCCCAUGUGAUUUUAAUAGCUUCUUAGGAGAAUGACAAAAAAAAAAAAAAAAAAAAAAAAAAAAAAAAA	CUGUGCGUGUGACAGCGGCUGA
NC_045512.2	49	58	53	58	2.19	hsa-miR-203a-3p_MIMAT0000264	1	9	1	6	0.2	-4.12	-6.51	-0.483298	ACAUUUUCAC&GUGAAAUGU	(((.((((((&)))))))))	CAAUCUUUAAUCAGUGUGUAACAUUAGGGAGGACUUGAAAGAGCCACCACAUUUUCACCGAGGCCACGCGGAGUACGAUCGAGUGUACAGUGAACAAUGCUAGGGAGAGCUGCCUAUAUGGAAGAGCCCUAAUGUGUAAAAUUAAUUUUAGUAGUGCUAUCCCCAUGUGAUUUUAAUAGCUUCUUAGGAGAAUGACAAAAAAAAAAAAAAAAAAAAAAAAAAAAAAAAA	GUGAAAUGUUUAGGACCACUAG
NC_045512.2	100	106	100	105	3.8	hsa-miR-501-5p_MIMAT0002872	10	16	11	16	2.51	-4.12	-10.43	-0.483298	CUAGGGA&UCCCUGG	(((((((&)))))))	CAAUCUUUAAUCAGUGUGUAACAUUAGGGAGGACUUGAAAGAGCCACCACAUUUUCACCGAGGCCACGCGGAGUACGAUCGAGUGUACAGUGAACAAUGCUAGGGAGAGCUGCCUAUAUGGAAGAGCCCUAAUGUGUAAAAUUAAUUUUAGUAGUGCUAUCCCCAUGUGAUUUUAAUAGCUUCUUAGGAGAAUGACAAAAAAAAAAAAAAAAAAAAAAAAAAAAAAAAA	AAUCCUUUGUCCCUGGGUGAGA
NC_045512.2	103	128	116	121	10.71	hsa-miR-149-5p_MIMAT0000450	4	23	8	13	2.21	-4.11	-17.03	-0.479624	GGGAGAGCUGCCUAUAUGGAAGAGCC&GGCUCCGUGUCUUCACUCCC	(((((...((...((((((...((((&))))))))))...)))))))	CAAUCUUUAAUCAGUGUGUAACAUUAGGGAGGACUUGAAAGAGCCACCACAUUUUCACCGAGGCCACGCGGAGUACGAUCGAGUGUACAGUGAACAAUGCUAGGGAGAGCUGCCUAUAUGGAAGAGCCCUAAUGUGUAAAAUUAAUUUUAGUAGUGCUAUCCCCAUGUGAUUUUAAUAGCUUCUUAGGAGAAUGACAAAAAAAAAAAAAAAAAAAAAAAAAAAAAAAAA	UCUGGCUCCGUGUCUUCACUCCC
NC_045512.2	163	169	163	168	2.72	hsa-miR-194-5p_MIMAT0000460	15	21	16	21	1.57	-4.11	-8.4	-0.482125	CCAUGUG&CAUGUGG	(((((((&)))))))	CAAUCUUUAAUCAGUGUGUAACAUUAGGGAGGACUUGAAAGAGCCACCACAUUUUCACCGAGGCCACGCGGAGUACGAUCGAGUGUACAGUGAACAAUGCUAGGGAGAGCUGCCUAUAUGGAAGAGCCCUAAUGUGUAAAAUUAAUUUUAGUAGUGCUAUCCCCAUGUGAUUUUAAUAGCUUCUUAGGAGAAUGACAAAAAAAAAAAAAAAAAAAAAAAAAAAAAAAAA	UGUAACAGCAACUCCAUGUGGA
NC_045512.2	161	166	161	166	1.94	hsa-miR-3189-3p_MIMAT0015071	13	18	13	18	3.8	-4.11	-9.85	-0.48477	CCCCAU&AUGGGG	((((((&))))))	CAAUCUUUAAUCAGUGUGUAACAUUAGGGAGGACUUGAAAGAGCCACCACAUUUUCACCGAGGCCACGCGGAGUACGAUCGAGUGUACAGUGAACAAUGCUAGGGAGAGCUGCCUAUAUGGAAGAGCCCUAAUGUGUAAAAUUAAUUUUAGUAGUGCUAUCCCCAUGUGAUUUUAAUAGCUUCUUAGGAGAAUGACAAAAAAAAAAAAAAAAAAAAAAAAAAAAAAAAA	CCCUUGGGUCUGAUGGGGUAG
NC_045512.2	112	130	119	124	6.07	hsa-miR-6514-5p_MIMAT0025484	6	23	12	17	1.68	-4.11	-11.86	-0.479624	GCCUAUAUGGAAGAGCCCU&AGUGGACUUUCAGCUGGC	(((....((((((..((((&)).)).))))))...)))	CAAUCUUUAAUCAGUGUGUAACAUUAGGGAGGACUUGAAAGAGCCACCACAUUUUCACCGAGGCCACGCGGAGUACGAUCGAGUGUACAGUGAACAAUGCUAGGGAGAGCUGCCUAUAUGGAAGAGCCCUAAUGUGUAAAAUUAAUUUUAGUAGUGCUAUCCCCAUGUGAUUUUAAUAGCUUCUUAGGAGAAUGACAAAAAAAAAAAAAAAAAAAAAAAAAAAAAAAAA	UAUGGAGUGGACUUUCAGCUGGC
NC_045512.2	12	18	13	18	1.71	hsa-miR-1914-3p_MIMAT0007890	11	17	11	16	3.3	-4.1	-9.11	-0.480952	CAGUGUG&CGCACUG	(((((((&)))))))	CAAUCUUUAAUCAGUGUGUAACAUUAGGGAGGACUUGAAAGAGCCACCACAUUUUCACCGAGGCCACGCGGAGUACGAUCGAGUGUACAGUGAACAAUGCUAGGGAGAGCUGCCUAUAUGGAAGAGCCCUAAUGUGUAAAAUUAAUUUUAGUAGUGCUAUCCCCAUGUGAUUUUAAUAGCUUCUUAGGAGAAUGACAAAAAAAAAAAAAAAAAAAAAAAAAAAAAAAAA	GGAGGGGUCCCGCACUGGGAGG
NC_045512.2	160	168	163	168	3.28	hsa-miR-4802-3p_MIMAT0019982	2	12	2	7	2.24	-4.1	-9.62	-0.478457	UCCCCAUGU&ACAUGGAUGGA	(((((((((&))))))..)))	CAAUCUUUAAUCAGUGUGUAACAUUAGGGAGGACUUGAAAGAGCCACCACAUUUUCACCGAGGCCACGCGGAGUACGAUCGAGUGUACAGUGAACAAUGCUAGGGAGAGCUGCCUAUAUGGAAGAGCCCUAAUGUGUAAAAUUAAUUUUAGUAGUGCUAUCCCCAUGUGAUUUUAAUAGCUUCUUAGGAGAAUGACAAAAAAAAAAAAAAAAAAAAAAAAAAAAAAAAA	UACAUGGAUGGAAACCUUCAAGC
NC_045512.2	110	115	110	115	2.5	hsa-let-7g-5p_MIMAT0000414	3	8	3	8	0.97	-4.07	-7.54	-0.477433	CUGCCU&AGGUAG	((((((&))))))	CAAUCUUUAAUCAGUGUGUAACAUUAGGGAGGACUUGAAAGAGCCACCACAUUUUCACCGAGGCCACGCGGAGUACGAUCGAGUGUACAGUGAACAAUGCUAGGGAGAGCUGCCUAUAUGGAAGAGCCCUAAUGUGUAAAAUUAAUUUUAGUAGUGCUAUCCCCAUGUGAUUUUAAUAGCUUCUUAGGAGAAUGACAAAAAAAAAAAAAAAAAAAAAAAAAAAAAAAAA	UGAGGUAGUAGUUUGUACAGUU
NC_045512.2	133	138	133	138	1.21	hsa-miR-147b-5p_MIMAT0037331	13	18	13	18	0.78	-4.07	-6.06	-0.477433	UGUGUA&UGCACA	((((((&))))))	CAAUCUUUAAUCAGUGUGUAACAUUAGGGAGGACUUGAAAGAGCCACCACAUUUUCACCGAGGCCACGCGGAGUACGAUCGAGUGUACAGUGAACAAUGCUAGGGAGAGCUGCCUAUAUGGAAGAGCCCUAAUGUGUAAAAUUAAUUUUAGUAGUGCUAUCCCCAUGUGAUUUUAAUAGCUUCUUAGGAGAAUGACAAAAAAAAAAAAAAAAAAAAAAAAAAAAAAAAA	UGGAAACAUUUCUGCACAAACU
NC_045512.2	178	186	178	183	2.78	hsa-miR-6802-5p_MIMAT0027504	6	14	9	14	2.29	-4.06	-9.13	-0.481644	AGCUUCUUA&UGGGGGGCU	(((((((((&)))))))))	CAAUCUUUAAUCAGUGUGUAACAUUAGGGAGGACUUGAAAGAGCCACCACAUUUUCACCGAGGCCACGCGGAGUACGAUCGAGUGUACAGUGAACAAUGCUAGGGAGAGCUGCCUAUAUGGAAGAGCCCUAAUGUGUAAAAUUAAUUUUAGUAGUGCUAUCCCCAUGUGAUUUUAAUAGCUUCUUAGGAGAAUGACAAAAAAAAAAAAAAAAAAAAAAAAAAAAAAAAA	CUAGGUGGGGGGCUUGAAGC
NC_045512.2	99	113	102	107	5.71	hsa-miR-937-3p_MIMAT0004980	5	21	14	19	0.76	-4.06	-10.53	-0.476259	GCUAGGGAGAGCUGC&GCGCUCUGACUCUCUGC	((.((((((.((.((&)))).....))))))))	CAAUCUUUAAUCAGUGUGUAACAUUAGGGAGGACUUGAAAGAGCCACCACAUUUUCACCGAGGCCACGCGGAGUACGAUCGAGUGUACAGUGAACAAUGCUAGGGAGAGCUGCCUAUAUGGAAGAGCCCUAAUGUGUAAAAUUAAUUUUAGUAGUGCUAUCCCCAUGUGAUUUUAAUAGCUUCUUAGGAGAAUGACAAAAAAAAAAAAAAAAAAAAAAAAAAAAAAAAA	AUCCGCGCUCUGACUCUCUGCC
NC_045512.2	127	144	139	144	2.57	hsa-miR-196a-5p_MIMAT0000226	5	22	5	10	0.68	-4.03	-7.28	-0.47274	CCCUAAUGUGUAAAAUUA&UAGUUUCAUGUUGUUGGG	(((.((((((..((((((&))))))))))))...)))	CAAUCUUUAAUCAGUGUGUAACAUUAGGGAGGACUUGAAAGAGCCACCACAUUUUCACCGAGGCCACGCGGAGUACGAUCGAGUGUACAGUGAACAAUGCUAGGGAGAGCUGCCUAUAUGGAAGAGCCCUAAUGUGUAAAAUUAAUUUUAGUAGUGCUAUCCCCAUGUGAUUUUAAUAGCUUCUUAGGAGAAUGACAAAAAAAAAAAAAAAAAAAAAAAAAAAAAAAAA	UAGGUAGUUUCAUGUUGUUGGG
NC_045512.2	178	183	178	183	1.98	hsa-miR-3622a-5p_MIMAT0018003	9	14	9	14	0.92	-4.03	-6.93	-0.47274	AGCUUC&GGAGCU	((((((&))))))	CAAUCUUUAAUCAGUGUGUAACAUUAGGGAGGACUUGAAAGAGCCACCACAUUUUCACCGAGGCCACGCGGAGUACGAUCGAGUGUACAGUGAACAAUGCUAGGGAGAGCUGCCUAUAUGGAAGAGCCCUAAUGUGUAAAAUUAAUUUUAGUAGUGCUAUCCCCAUGUGAUUUUAAUAGCUUCUUAGGAGAAUGACAAAAAAAAAAAAAAAAAAAAAAAAAAAAAAAAA	CAGGCACGGGAGCUCAGGUGAG
NC_045512.2	92	97	92	97	1.3	hsa-miR-4677-5p_MIMAT0019760	1	6	1	6	0	-4.03	-5.33	-0.47274	GAACAA&UUGUUC	((((((&))))))	CAAUCUUUAAUCAGUGUGUAACAUUAGGGAGGACUUGAAAGAGCCACCACAUUUUCACCGAGGCCACGCGGAGUACGAUCGAGUGUACAGUGAACAAUGCUAGGGAGAGCUGCCUAUAUGGAAGAGCCCUAAUGUGUAAAAUUAAUUUUAGUAGUGCUAUCCCCAUGUGAUUUUAAUAGCUUCUUAGGAGAAUGACAAAAAAAAAAAAAAAAAAAAAAAAAAAAAAAAA	UUGUUCUUUGGUCUUUCAGCCA
NC_045512.2	164	169	164	169	2.19	hsa-miR-139-5p_MIMAT0000250	10	15	10	15	0.48	-4.01	-6.68	-0.467954	CAUGUG&CACGUG	((((((&))))))	CAAUCUUUAAUCAGUGUGUAACAUUAGGGAGGACUUGAAAGAGCCACCACAUUUUCACCGAGGCCACGCGGAGUACGAUCGAGUGUACAGUGAACAAUGCUAGGGAGAGCUGCCUAUAUGGAAGAGCCCUAAUGUGUAAAAUUAAUUUUAGUAGUGCUAUCCCCAUGUGAUUUUAAUAGCUUCUUAGGAGAAUGACAAAAAAAAAAAAAAAAAAAAAAAAAAAAAAAAA	UCUACAGUGCACGUGUCUCCAGU
NC_045512.2	55	61	55	60	2.38	hsa-miR-181c-5p_MIMAT0000258	14	20	15	20	4.39	-4.01	-10.78	-0.470394	UCACCGA&UCGGUGA	(((((((&)))))))	CAAUCUUUAAUCAGUGUGUAACAUUAGGGAGGACUUGAAAGAGCCACCACAUUUUCACCGAGGCCACGCGGAGUACGAUCGAGUGUACAGUGAACAAUGCUAGGGAGAGCUGCCUAUAUGGAAGAGCCCUAAUGUGUAAAAUUAAUUUUAGUAGUGCUAUCCCCAUGUGAUUUUAAUAGCUUCUUAGGAGAAUGACAAAAAAAAAAAAAAAAAAAAAAAAAAAAAAAAA	AACAUUCAACCUGUCGGUGAGU
NC_045512.2	106	112	107	112	1.75	hsa-miR-146b-3p_MIMAT0004766	13	19	13	18	2.03	-3.99	-7.77	-0.468048	AGAGCUG&CAGUUCU	(((((((&)))))))	CAAUCUUUAAUCAGUGUGUAACAUUAGGGAGGACUUGAAAGAGCCACCACAUUUUCACCGAGGCCACGCGGAGUACGAUCGAGUGUACAGUGAACAAUGCUAGGGAGAGCUGCCUAUAUGGAAGAGCCCUAAUGUGUAAAAUUAAUUUUAGUAGUGCUAUCCCCAUGUGAUUUUAAUAGCUUCUUAGGAGAAUGACAAAAAAAAAAAAAAAAAAAAAAAAAAAAAAAAA	GCCCUGUGGACUCAGUUCUGGU
NC_045512.2	192	201	195	200	0.63	hsa-miR-153-5p_MIMAT0026480	4	13	5	10	1.77	-3.99	-6.39	-0.468048	AUGACAAAAA&UUUUUGUGAU	((.(((((((&))))))).))	CAAUCUUUAAUCAGUGUGUAACAUUAGGGAGGACUUGAAAGAGCCACCACAUUUUCACCGAGGCCACGCGGAGUACGAUCGAGUGUACAGUGAACAAUGCUAGGGAGAGCUGCCUAUAUGGAAGAGCCCUAAUGUGUAAAAUUAAUUUUAGUAGUGCUAUCCCCAUGUGAUUUUAAUAGCUUCUUAGGAGAAUGACAAAAAAAAAAAAAAAAAAAAAAAAAAAAAAAAA	UCAUUUUUGUGAUGUUGCAGCU
NC_045512.2	194	199	194	199	0.57	hsa-miR-501-5p_MIMAT0002872	6	11	6	11	0.13	-3.98	-4.68	-0.466875	GACAAA&UUUGUC	((((((&))))))	CAAUCUUUAAUCAGUGUGUAACAUUAGGGAGGACUUGAAAGAGCCACCACAUUUUCACCGAGGCCACGCGGAGUACGAUCGAGUGUACAGUGAACAAUGCUAGGGAGAGCUGCCUAUAUGGAAGAGCCCUAAUGUGUAAAAUUAAUUUUAGUAGUGCUAUCCCCAUGUGAUUUUAAUAGCUUCUUAGGAGAAUGACAAAAAAAAAAAAAAAAAAAAAAAAAAAAAAAAA	AAUCCUUUGUCCCUGGGUGAGA
NC_045512.2	57	62	57	62	3.25	hsa-miR-659-3p_MIMAT0003337	1	6	1	6	0.02	-3.98	-7.25	-0.466875	ACCGAG&CUUGGU	((((((&))))))	CAAUCUUUAAUCAGUGUGUAACAUUAGGGAGGACUUGAAAGAGCCACCACAUUUUCACCGAGGCCACGCGGAGUACGAUCGAGUGUACAGUGAACAAUGCUAGGGAGAGCUGCCUAUAUGGAAGAGCCCUAAUGUGUAAAAUUAAUUUUAGUAGUGCUAUCCCCAUGUGAUUUUAAUAGCUUCUUAGGAGAAUGACAAAAAAAAAAAAAAAAAAAAAAAAAAAAAAAAA	CUUGGUUCAGGGAGGGUCCCCA
NC_045512.2	164	191	186	191	6.22	hsa-miR-942-5p_MIMAT0004985	1	22	1	6	0.21	-3.98	-10.41	-0.466875	CAUGUGAUUUUAAUAGCUUCUUAGGAGA&UCUUCUCUGUUUUGGCCAUGUG	((((((.....(((((......((((((&))))))))))).....))))))	CAAUCUUUAAUCAGUGUGUAACAUUAGGGAGGACUUGAAAGAGCCACCACAUUUUCACCGAGGCCACGCGGAGUACGAUCGAGUGUACAGUGAACAAUGCUAGGGAGAGCUGCCUAUAUGGAAGAGCCCUAAUGUGUAAAAUUAAUUUUAGUAGUGCUAUCCCCAUGUGAUUUUAAUAGCUUCUUAGGAGAAUGACAAAAAAAAAAAAAAAAAAAAAAAAAAAAAAAAA	UCUUCUCUGUUUUGGCCAUGUG
NC_045512.2	151	157	151	156	2.23	hsa-miR-19a-5p_MIMAT0004490	15	21	16	21	5.25	-3.97	-11.45	-0.465702	GUAGUGC&GCACUAC	(((((((&)))))))	CAAUCUUUAAUCAGUGUGUAACAUUAGGGAGGACUUGAAAGAGCCACCACAUUUUCACCGAGGCCACGCGGAGUACGAUCGAGUGUACAGUGAACAAUGCUAGGGAGAGCUGCCUAUAUGGAAGAGCCCUAAUGUGUAAAAUUAAUUUUAGUAGUGCUAUCCCCAUGUGAUUUUAAUAGCUUCUUAGGAGAAUGACAAAAAAAAAAAAAAAAAAAAAAAAAAAAAAAAA	AGUUUUGCAUAGUUGCACUACA
NC_045512.2	81	95	90	95	3.43	hsa-miR-876-3p_MIMAT0004925	6	21	6	11	1.67	-3.97	-9.07	-0.465702	GAGUGUACAGUGAAC&GUUUACAAAGUAAUUC	((((.(((.((((((&))))))...)))))))	CAAUCUUUAAUCAGUGUGUAACAUUAGGGAGGACUUGAAAGAGCCACCACAUUUUCACCGAGGCCACGCGGAGUACGAUCGAGUGUACAGUGAACAAUGCUAGGGAGAGCUGCCUAUAUGGAAGAGCCCUAAUGUGUAAAAUUAAUUUUAGUAGUGCUAUCCCCAUGUGAUUUUAAUAGCUUCUUAGGAGAAUGACAAAAAAAAAAAAAAAAAAAAAAAAAAAAAAAAA	UGGUGGUUUACAAAGUAAUUCA
NC_045512.2	106	111	106	111	1.75	hsa-miR-3140-5p_MIMAT0019204	16	21	16	21	0.03	-3.96	-5.74	-0.467078	AGAGCU&AGCUUU	((((((&))))))	CAAUCUUUAAUCAGUGUGUAACAUUAGGGAGGACUUGAAAGAGCCACCACAUUUUCACCGAGGCCACGCGGAGUACGAUCGAGUGUACAGUGAACAAUGCUAGGGAGAGCUGCCUAUAUGGAAGAGCCCUAAUGUGUAAAAUUAAUUUUAGUAGUGCUAUCCCCAUGUGAUUUUAAUAGCUUCUUAGGAGAAUGACAAAAAAAAAAAAAAAAAAAAAAAAAAAAAAAAA	ACCUGAAUUACCAAAAGCUUU
NC_045512.2	80	89	81	86	3.01	hsa-miR-369-5p_MIMAT0001621	11	21	15	20	0.55	-3.96	-7.52	-0.464529	CGAGUGUACA&UGUUAUAUUCG	((((((((((&)).))))))))	CAAUCUUUAAUCAGUGUGUAACAUUAGGGAGGACUUGAAAGAGCCACCACAUUUUCACCGAGGCCACGCGGAGUACGAUCGAGUGUACAGUGAACAAUGCUAGGGAGAGCUGCCUAUAUGGAAGAGCCCUAAUGUGUAAAAUUAAUUUUAGUAGUGCUAUCCCCAUGUGAUUUUAAUAGCUUCUUAGGAGAAUGACAAAAAAAAAAAAAAAAAAAAAAAAAAAAAAAAA	AGAUCGACCGUGUUAUAUUCGC
NC_045512.2	89	94	89	94	1.23	hsa-miR-3664-5p_MIMAT0018086	10	15	10	15	0.01	-3.96	-5.2	-0.464529	AGUGAA&UUCACU	((((((&))))))	CAAUCUUUAAUCAGUGUGUAACAUUAGGGAGGACUUGAAAGAGCCACCACAUUUUCACCGAGGCCACGCGGAGUACGAUCGAGUGUACAGUGAACAAUGCUAGGGAGAGCUGCCUAUAUGGAAGAGCCCUAAUGUGUAAAAUUAAUUUUAGUAGUGCUAUCCCCAUGUGAUUUUAAUAGCUUCUUAGGAGAAUGACAAAAAAAAAAAAAAAAAAAAAAAAAAAAAAAAA	AACUCUGUCUUCACUCAUGAGU
NC_045512.2	21	39	24	29	4.79	hsa-miR-561-3p_MIMAT0003225	6	22	14	19	1.81	-3.95	-10.55	-0.463356	ACAUUAGGGAGGACUUGAA&UUUAAGAUCCUUGAAGU	((.(((((((...((((((&)))))).))))))).))	CAAUCUUUAAUCAGUGUGUAACAUUAGGGAGGACUUGAAAGAGCCACCACAUUUUCACCGAGGCCACGCGGAGUACGAUCGAGUGUACAGUGAACAAUGCUAGGGAGAGCUGCCUAUAUGGAAGAGCCCUAAUGUGUAAAAUUAAUUUUAGUAGUGCUAUCCCCAUGUGAUUUUAAUAGCUUCUUAGGAGAAUGACAAAAAAAAAAAAAAAAAAAAAAAAAAAAAAAAA	CAAAGUUUAAGAUCCUUGAAGU
NC_045512.2	120	138	133	138	3.81	hsa-miR-190a-3p_MIMAT0026482	2	20	2	7	0.05	-3.94	-7.8	-0.464719	GGAAGAGCCCUAAUGUGUA&UAUAUAUCAAACAUAUUCC	((((........(((((((&)))))))........))))	CAAUCUUUAAUCAGUGUGUAACAUUAGGGAGGACUUGAAAGAGCCACCACAUUUUCACCGAGGCCACGCGGAGUACGAUCGAGUGUACAGUGAACAAUGCUAGGGAGAGCUGCCUAUAUGGAAGAGCCCUAAUGUGUAAAAUUAAUUUUAGUAGUGCUAUCCCCAUGUGAUUUUAAUAGCUUCUUAGGAGAAUGACAAAAAAAAAAAAAAAAAAAAAAAAAAAAAAAAA	CUAUAUAUCAAACAUAUUCCU
NC_045512.2	89	96	90	95	1.33	hsa-miR-30c-2-3p_MIMAT0004550	13	20	14	19	2.37	-3.94	-7.64	-0.462183	AGUGAACA&UGUUUACU	((((((((&))))))))	CAAUCUUUAAUCAGUGUGUAACAUUAGGGAGGACUUGAAAGAGCCACCACAUUUUCACCGAGGCCACGCGGAGUACGAUCGAGUGUACAGUGAACAAUGCUAGGGAGAGCUGCCUAUAUGGAAGAGCCCUAAUGUGUAAAAUUAAUUUUAGUAGUGCUAUCCCCAUGUGAUUUUAAUAGCUUCUUAGGAGAAUGACAAAAAAAAAAAAAAAAAAAAAAAAAAAAAAAAA	CUGGGAGAAGGCUGUUUACUCU
NC_045512.2	65	74	68	73	4	hsa-miR-4772-3p_MIMAT0019927	7	16	8	13	1.55	-3.94	-9.49	-0.462183	CACGCGGAGU&ACUUUGCCUG	((.(((((((&))))))).))	CAAUCUUUAAUCAGUGUGUAACAUUAGGGAGGACUUGAAAGAGCCACCACAUUUUCACCGAGGCCACGCGGAGUACGAUCGAGUGUACAGUGAACAAUGCUAGGGAGAGCUGCCUAUAUGGAAGAGCCCUAAUGUGUAAAAUUAAUUUUAGUAGUGCUAUCCCCAUGUGAUUUUAAUAGCUUCUUAGGAGAAUGACAAAAAAAAAAAAAAAAAAAAAAAAAAAAAAAAA	CCUGCAACUUUGCCUGAUCAGA
NC_045512.2	120	126	120	125	3.15	hsa-miR-5187-3p_MIMAT0021118	11	17	12	17	0.08	-3.93	-7.16	-0.463539	GGAAGAG&CUUUUCC	(((((((&)))))))	CAAUCUUUAAUCAGUGUGUAACAUUAGGGAGGACUUGAAAGAGCCACCACAUUUUCACCGAGGCCACGCGGAGUACGAUCGAGUGUACAGUGAACAAUGCUAGGGAGAGCUGCCUAUAUGGAAGAGCCCUAAUGUGUAAAAUUAAUUUUAGUAGUGCUAUCCCCAUGUGAUUUUAAUAGCUUCUUAGGAGAAUGACAAAAAAAAAAAAAAAAAAAAAAAAAAAAAAAAA	ACUGAAUCCUCUUUUCCUCAG
NC_045512.2	183	191	183	188	3.6	hsa-miR-6802-3p_MIMAT0027505	11	19	14	19	0.06	-3.93	-7.59	-0.46101	CUUAGGAGA&UCACCUAAG	((((((.((&)).))))))	CAAUCUUUAAUCAGUGUGUAACAUUAGGGAGGACUUGAAAGAGCCACCACAUUUUCACCGAGGCCACGCGGAGUACGAUCGAGUGUACAGUGAACAAUGCUAGGGAGAGCUGCCUAUAUGGAAGAGCCCUAAUGUGUAAAAUUAAUUUUAGUAGUGCUAUCCCCAUGUGAUUUUAAUAGCUUCUUAGGAGAAUGACAAAAAAAAAAAAAAAAAAAAAAAAAAAAAAAAA	UUCACCCCUCUCACCUAAGCAG
NC_045512.2	83	89	83	88	2.73	hsa-miR-941_MIMAT0004984	11	17	12	17	2.88	-3.93	-9.54	-0.458618	GUGUACA&UGUGCAC	(((((((&)))))))	CAAUCUUUAAUCAGUGUGUAACAUUAGGGAGGACUUGAAAGAGCCACCACAUUUUCACCGAGGCCACGCGGAGUACGAUCGAGUGUACAGUGAACAAUGCUAGGGAGAGCUGCCUAUAUGGAAGAGCCCUAAUGUGUAAAAUUAAUUUUAGUAGUGCUAUCCCCAUGUGAUUUUAAUAGCUUCUUAGGAGAAUGACAAAAAAAAAAAAAAAAAAAAAAAAAAAAAAAAA	CACCCGGCUGUGUGCACAUGUGC
NC_045512.2	105	113	108	113	3.55	hsa-miR-132-5p_MIMAT0004594	4	12	4	9	4.19	-3.92	-11.66	-0.459837	GAGAGCUGC&GUGGCUUUC	(((((((((&)))))))))	CAAUCUUUAAUCAGUGUGUAACAUUAGGGAGGACUUGAAAGAGCCACCACAUUUUCACCGAGGCCACGCGGAGUACGAUCGAGUGUACAGUGAACAAUGCUAGGGAGAGCUGCCUAUAUGGAAGAGCCCUAAUGUGUAAAAUUAAUUUUAGUAGUGCUAUCCCCAUGUGAUUUUAAUAGCUUCUUAGGAGAAUGACAAAAAAAAAAAAAAAAAAAAAAAAAAAAAAAAA	ACCGUGGCUUUCGAUUGUUACU
NC_045512.2	12	17	12	17	1.7	hsa-miR-429_MIMAT0001536	3	8	3	8	0.11	-3.92	-5.73	-0.459837	CAGUGU&AUACUG	((((((&))))))	CAAUCUUUAAUCAGUGUGUAACAUUAGGGAGGACUUGAAAGAGCCACCACAUUUUCACCGAGGCCACGCGGAGUACGAUCGAGUGUACAGUGAACAAUGCUAGGGAGAGCUGCCUAUAUGGAAGAGCCCUAAUGUGUAAAAUUAAUUUUAGUAGUGCUAUCCCCAUGUGAUUUUAAUAGCUUCUUAGGAGAAUGACAAAAAAAAAAAAAAAAAAAAAAAAAAAAAAAAA	UAAUACUGUCUGGUAAAACCGU
NC_045512.2	110	115	110	115	2.5	hsa-miR-6734-5p_MIMAT0027369	15	20	15	20	0.02	-3.92	-6.44	-0.457451	CUGCCU&AGGUGG	((((((&))))))	CAAUCUUUAAUCAGUGUGUAACAUUAGGGAGGACUUGAAAGAGCCACCACAUUUUCACCGAGGCCACGCGGAGUACGAUCGAGUGUACAGUGAACAAUGCUAGGGAGAGCUGCCUAUAUGGAAGAGCCCUAAUGUGUAAAAUUAAUUUUAGUAGUGCUAUCCCCAUGUGAUUUUAAUAGCUUCUUAGGAGAAUGACAAAAAAAAAAAAAAAAAAAAAAAAAAAAAAAAA	UUGAGGGGAGAAUGAGGUGGAGA
NC_045512.2	12	19	12	17	1.71	hsa-miR-196b-3p_MIMAT0009201	9	17	12	17	2.09	-3.91	-7.71	-0.458664	CAGUGUGU&ACGACACUG	((((((((&)).))))))	CAAUCUUUAAUCAGUGUGUAACAUUAGGGAGGACUUGAAAGAGCCACCACAUUUUCACCGAGGCCACGCGGAGUACGAUCGAGUGUACAGUGAACAAUGCUAGGGAGAGCUGCCUAUAUGGAAGAGCCCUAAUGUGUAAAAUUAAUUUUAGUAGUGCUAUCCCCAUGUGAUUUUAAUAGCUUCUUAGGAGAAUGACAAAAAAAAAAAAAAAAAAAAAAAAAAAAAAAAA	UCGACAGCACGACACUGCCUUC
NC_045512.2	99	116	109	114	7.35	hsa-miR-3187-5p_MIMAT0019216	3	17	5	10	6.9	-3.91	-18.16	-0.456284	GCUAGGGAGAGCUGCCUA&UGGGCAGCGUGUGGC	((((......((((((((&))))))))...))))	CAAUCUUUAAUCAGUGUGUAACAUUAGGGAGGACUUGAAAGAGCCACCACAUUUUCACCGAGGCCACGCGGAGUACGAUCGAGUGUACAGUGAACAAUGCUAGGGAGAGCUGCCUAUAUGGAAGAGCCCUAAUGUGUAAAAUUAAUUUUAGUAGUGCUAUCCCCAUGUGAUUUUAAUAGCUUCUUAGGAGAAUGACAAAAAAAAAAAAAAAAAAAAAAAAAAAAAAAAA	CCUGGGCAGCGUGUGGCUGAAGG
NC_045512.2	150	155	150	155	1.84	hsa-miR-98-3p_MIMAT0022842	12	17	12	17	0	-3.91	-5.75	-0.458664	AGUAGU&ACUACU	((((((&))))))	CAAUCUUUAAUCAGUGUGUAACAUUAGGGAGGACUUGAAAGAGCCACCACAUUUUCACCGAGGCCACGCGGAGUACGAUCGAGUGUACAGUGAACAAUGCUAGGGAGAGCUGCCUAUAUGGAAGAGCCCUAAUGUGUAAAAUUAAUUUUAGUAGUGCUAUCCCCAUGUGAUUUUAAUAGCUUCUUAGGAGAAUGACAAAAAAAAAAAAAAAAAAAAAAAAAAAAAAAAA	CUAUACAACUUACUACUUUCCC
NC_045512.2	85	90	85	90	2.01	hsa-miR-1914-5p_MIMAT0007889	3	8	3	8	0.75	-3.9	-6.66	-0.457491	GUACAG&CUGUGC	((((((&))))))	CAAUCUUUAAUCAGUGUGUAACAUUAGGGAGGACUUGAAAGAGCCACCACAUUUUCACCGAGGCCACGCGGAGUACGAUCGAGUGUACAGUGAACAAUGCUAGGGAGAGCUGCCUAUAUGGAAGAGCCCUAAUGUGUAAAAUUAAUUUUAGUAGUGCUAUCCCCAUGUGAUUUUAAUAGCUUCUUAGGAGAAUGACAAAAAAAAAAAAAAAAAAAAAAAAAAAAAAAAA	CCCUGUGCCCGGCCCACUUCUG
NC_045512.2	190	196	191	196	0.57	hsa-miR-382-5p_MIMAT0000737	4	10	4	9	1.15	-3.9	-5.62	-0.457491	GAAUGAC&GUUGUUC	(((((((&)))))))	CAAUCUUUAAUCAGUGUGUAACAUUAGGGAGGACUUGAAAGAGCCACCACAUUUUCACCGAGGCCACGCGGAGUACGAUCGAGUGUACAGUGAACAAUGCUAGGGAGAGCUGCCUAUAUGGAAGAGCCCUAAUGUGUAAAAUUAAUUUUAGUAGUGCUAUCCCCAUGUGAUUUUAAUAGCUUCUUAGGAGAAUGACAAAAAAAAAAAAAAAAAAAAAAAAAAAAAAAAA	GAAGUUGUUCGUGGUGGAUUCG
NC_045512.2	177	182	177	182	2.04	hsa-miR-9-3p_MIMAT0000442	4	9	4	9	0.06	-3.89	-5.99	-0.456318	UAGCUU&AAGCUA	((((((&))))))	CAAUCUUUAAUCAGUGUGUAACAUUAGGGAGGACUUGAAAGAGCCACCACAUUUUCACCGAGGCCACGCGGAGUACGAUCGAGUGUACAGUGAACAAUGCUAGGGAGAGCUGCCUAUAUGGAAGAGCCCUAAUGUGUAAAAUUAAUUUUAGUAGUGCUAUCCCCAUGUGAUUUUAAUAGCUUCUUAGGAGAAUGACAAAAAAAAAAAAAAAAAAAAAAAAAAAAAAAAA	AUAAAGCUAGAUAACCGAAAGU
NC_045512.2	136	143	136	141	0.72	hsa-miR-548a-5p_MIMAT0004803	14	21	16	21	0.57	-3.88	-5.17	-0.455145	GUAAAAUU&AGUUUUAC	((((((((&))))))))	CAAUCUUUAAUCAGUGUGUAACAUUAGGGAGGACUUGAAAGAGCCACCACAUUUUCACCGAGGCCACGCGGAGUACGAUCGAGUGUACAGUGAACAAUGCUAGGGAGAGCUGCCUAUAUGGAAGAGCCCUAAUGUGUAAAAUUAAUUUUAGUAGUGCUAUCCCCAUGUGAUUUUAAUAGCUUCUUAGGAGAAUGACAAAAAAAAAAAAAAAAAAAAAAAAAAAAAAAAA	AAAAGUAAUUGCGAGUUUUACC
NC_045512.2	147	165	147	152	3.27	hsa-miR-1298-3p_MIMAT0026641	5	20	15	20	1.1	-3.85	-8.22	-0.454103	UUUAGUAGUGCUAUCCCCA&UGGGCAACUGACUGAA	((((((((((.....((((&)))))).)).))))))	CAAUCUUUAAUCAGUGUGUAACAUUAGGGAGGACUUGAAAGAGCCACCACAUUUUCACCGAGGCCACGCGGAGUACGAUCGAGUGUACAGUGAACAAUGCUAGGGAGAGCUGCCUAUAUGGAAGAGCCCUAAUGUGUAAAAUUAAUUUUAGUAGUGCUAUCCCCAUGUGAUUUUAAUAGCUUCUUAGGAGAAUGACAAAAAAAAAAAAAAAAAAAAAAAAAAAAAAAAA	CAUCUGGGCAACUGACUGAAC
NC_045512.2	110	115	110	115	2.5	hsa-miR-20b-5p_MIMAT0001413	18	23	18	23	0.23	-3.85	-6.58	-0.449283	CUGCCU&AGGUAG	((((((&))))))	CAAUCUUUAAUCAGUGUGUAACAUUAGGGAGGACUUGAAAGAGCCACCACAUUUUCACCGAGGCCACGCGGAGUACGAUCGAGUGUACAGUGAACAAUGCUAGGGAGAGCUGCCUAUAUGGAAGAGCCCUAAUGUGUAAAAUUAAUUUUAGUAGUGCUAUCCCCAUGUGAUUUUAAUAGCUUCUUAGGAGAAUGACAAAAAAAAAAAAAAAAAAAAAAAAAAAAAAAAA	CAAAGUGCUCAUAGUGCAGGUAG
NC_045512.2	110	115	110	115	2.5	hsa-miR-20a-5p_MIMAT0000075	18	23	18	23	0.23	-3.85	-6.58	-0.449283	CUGCCU&AGGUAG	((((((&))))))	CAAUCUUUAAUCAGUGUGUAACAUUAGGGAGGACUUGAAAGAGCCACCACAUUUUCACCGAGGCCACGCGGAGUACGAUCGAGUGUACAGUGAACAAUGCUAGGGAGAGCUGCCUAUAUGGAAGAGCCCUAAUGUGUAAAAUUAAUUUUAGUAGUGCUAUCCCCAUGUGAUUUUAAUAGCUUCUUAGGAGAAUGACAAAAAAAAAAAAAAAAAAAAAAAAAAAAAAAAA	UAAAGUGCUUAUAGUGCAGGUAG
NC_045512.2	18	29	21	26	3.53	hsa-miR-4670-5p_MIMAT0019750	7	18	10	15	0.59	-3.85	-7.97	-0.451625	GUAACAUUAGGG&CCAUGAUGUAAC	((.((((((.((&)).)))))).))	CAAUCUUUAAUCAGUGUGUAACAUUAGGGAGGACUUGAAAGAGCCACCACAUUUUCACCGAGGCCACGCGGAGUACGAUCGAGUGUACAGUGAACAAUGCUAGGGAGAGCUGCCUAUAUGGAAGAGCCCUAAUGUGUAAAAUUAAUUUUAGUAGUGCUAUCCCCAUGUGAUUUUAAUAGCUUCUUAGGAGAAUGACAAAAAAAAAAAAAAAAAAAAAAAAAAAAAAAAA	AAGCGACCAUGAUGUAACUUCA
NC_045512.2	110	115	110	115	2.5	hsa-miR-106a-5p_MIMAT0000103	18	23	18	23	0.24	-3.84	-6.58	-0.448116	CUGCCU&AGGUAG	((((((&))))))	CAAUCUUUAAUCAGUGUGUAACAUUAGGGAGGACUUGAAAGAGCCACCACAUUUUCACCGAGGCCACGCGGAGUACGAUCGAGUGUACAGUGAACAAUGCUAGGGAGAGCUGCCUAUAUGGAAGAGCCCUAAUGUGUAAAAUUAAUUUUAGUAGUGCUAUCCCCAUGUGAUUUUAAUAGCUUCUUAGGAGAAUGACAAAAAAAAAAAAAAAAAAAAAAAAAAAAAAAAA	AAAAGUGCUUACAGUGCAGGUAG
NC_045512.2	86	91	86	91	2.12	hsa-miR-144-5p_MIMAT0004600	15	20	15	20	0.18	-3.84	-6.14	-0.450452	UACAGU&ACUGUA	((((((&))))))	CAAUCUUUAAUCAGUGUGUAACAUUAGGGAGGACUUGAAAGAGCCACCACAUUUUCACCGAGGCCACGCGGAGUACGAUCGAGUGUACAGUGAACAAUGCUAGGGAGAGCUGCCUAUAUGGAAGAGCCCUAAUGUGUAAAAUUAAUUUUAGUAGUGCUAUCCCCAUGUGAUUUUAAUAGCUUCUUAGGAGAAUGACAAAAAAAAAAAAAAAAAAAAAAAAAAAAAAAAA	GGAUAUCAUCAUAUACUGUAAG
NC_045512.2	76	86	76	81	3.66	hsa-miR-154-3p_MIMAT0000453	5	15	10	15	1.13	-3.84	-8.63	-0.450452	CGAUCGAGUGU&AUACACGGUUG	((((((.((((&)))).))))))	CAAUCUUUAAUCAGUGUGUAACAUUAGGGAGGACUUGAAAGAGCCACCACAUUUUCACCGAGGCCACGCGGAGUACGAUCGAGUGUACAGUGAACAAUGCUAGGGAGAGCUGCCUAUAUGGAAGAGCCCUAAUGUGUAAAAUUAAUUUUAGUAGUGCUAUCCCCAUGUGAUUUUAAUAGCUUCUUAGGAGAAUGACAAAAAAAAAAAAAAAAAAAAAAAAAAAAAAAAA	AAUCAUACACGGUUGACCUAUU
NC_045512.2	175	182	175	180	2.08	hsa-miR-30c-2-3p_MIMAT0004550	9	16	11	16	1.29	-3.84	-7.21	-0.450452	AAUAGCUU&AGGCUGUU	((((((((&))))))))	CAAUCUUUAAUCAGUGUGUAACAUUAGGGAGGACUUGAAAGAGCCACCACAUUUUCACCGAGGCCACGCGGAGUACGAUCGAGUGUACAGUGAACAAUGCUAGGGAGAGCUGCCUAUAUGGAAGAGCCCUAAUGUGUAAAAUUAAUUUUAGUAGUGCUAUCCCCAUGUGAUUUUAAUAGCUUCUUAGGAGAAUGACAAAAAAAAAAAAAAAAAAAAAAAAAAAAAAAAA	CUGGGAGAAGGCUGUUUACUCU
NC_045512.2	110	115	110	115	2.5	hsa-miR-17-5p_MIMAT0000070	18	23	18	23	0.25	-3.83	-6.58	-0.446949	CUGCCU&AGGUAG	((((((&))))))	CAAUCUUUAAUCAGUGUGUAACAUUAGGGAGGACUUGAAAGAGCCACCACAUUUUCACCGAGGCCACGCGGAGUACGAUCGAGUGUACAGUGAACAAUGCUAGGGAGAGCUGCCUAUAUGGAAGAGCCCUAAUGUGUAAAAUUAAUUUUAGUAGUGCUAUCCCCAUGUGAUUUUAAUAGCUUCUUAGGAGAAUGACAAAAAAAAAAAAAAAAAAAAAAAAAAAAAAAAA	CAAAGUGCUUACAGUGCAGGUAG
NC_045512.2	3	8	3	8	0.58	hsa-miR-3144-5p_MIMAT0015014	11	16	11	16	0.01	-3.81	-4.4	-0.446933	AUCUUU&AGAGAU	((((((&))))))	CAAUCUUUAAUCAGUGUGUAACAUUAGGGAGGACUUGAAAGAGCCACCACAUUUUCACCGAGGCCACGCGGAGUACGAUCGAGUGUACAGUGAACAAUGCUAGGGAGAGCUGCCUAUAUGGAAGAGCCCUAAUGUGUAAAAUUAAUUUUAGUAGUGCUAUCCCCAUGUGAUUUUAAUAGCUUCUUAGGAGAAUGACAAAAAAAAAAAAAAAAAAAAAAAAAAAAAAAAA	AGGGGACCAAAGAGAUAUAUAG
NC_045512.2	108	113	108	113	1.44	hsa-miR-548o-3p_MIMAT0005919	9	14	9	14	1.63	-3.8	-6.87	-0.44576	AGCUGC&GCAGUU	((((((&))))))	CAAUCUUUAAUCAGUGUGUAACAUUAGGGAGGACUUGAAAGAGCCACCACAUUUUCACCGAGGCCACGCGGAGUACGAUCGAGUGUACAGUGAACAAUGCUAGGGAGAGCUGCCUAUAUGGAAGAGCCCUAAUGUGUAAAAUUAAUUUUAGUAGUGCUAUCCCCAUGUGAUUUUAAUAGCUUCUUAGGAGAAUGACAAAAAAAAAAAAAAAAAAAAAAAAAAAAAAAAA	CCAAAACUGCAGUUACUUUUGC
NC_045512.2	150	157	150	155	2.31	hsa-miR-548x-3p_MIMAT0015081	9	17	12	17	0.02	-3.8	-6.13	-0.4508	AGUAGUGC&GCAAUUACU	((((((((&)).))))))	CAAUCUUUAAUCAGUGUGUAACAUUAGGGAGGACUUGAAAGAGCCACCACAUUUUCACCGAGGCCACGCGGAGUACGAUCGAGUGUACAGUGAACAAUGCUAGGGAGAGCUGCCUAUAUGGAAGAGCCCUAAUGUGUAAAAUUAAUUUUAGUAGUGCUAUCCCCAUGUGAUUUUAAUAGCUUCUUAGGAGAAUGACAAAAAAAAAAAAAAAAAAAAAAAAAAAAAAAAA	UAAAAACUGCAAUUACUUUC
NC_045512.2	150	157	150	155	2.31	hsa-miR-548ae-3p_MIMAT0018954	9	17	12	17	0.03	-3.79	-6.13	-0.447027	AGUAGUGC&GCAAUUACU	((((((((&)).))))))	CAAUCUUUAAUCAGUGUGUAACAUUAGGGAGGACUUGAAAGAGCCACCACAUUUUCACCGAGGCCACGCGGAGUACGAUCGAGUGUACAGUGAACAAUGCUAGGGAGAGCUGCCUAUAUGGAAGAGCCCUAAUGUGUAAAAUUAAUUUUAGUAGUGCUAUCCCCAUGUGAUUUUAAUAGCUUCUUAGGAGAAUGACAAAAAAAAAAAAAAAAAAAAAAAAAAAAAAAAA	CAAAAACUGCAAUUACUUUCA
NC_045512.2	151	156	151	156	2.05	hsa-miR-3064-3p_MIMAT0019865	7	12	7	12	2.12	-3.78	-7.95	-0.441114	GUAGUG&CACUGC	((((((&))))))	CAAUCUUUAAUCAGUGUGUAACAUUAGGGAGGACUUGAAAGAGCCACCACAUUUUCACCGAGGCCACGCGGAGUACGAUCGAGUGUACAGUGAACAAUGCUAGGGAGAGCUGCCUAUAUGGAAGAGCCCUAAUGUGUAAAAUUAAUUUUAGUAGUGCUAUCCCCAUGUGAUUUUAAUAGCUUCUUAGGAGAAUGACAAAAAAAAAAAAAAAAAAAAAAAAAAAAAAAAA	UUGCCACACUGCAACACCUUACA
NC_045512.2	33	44	33	38	3.04	hsa-miR-3140-3p_MIMAT0015008	2	19	14	19	2.17	-3.76	-8.97	-0.441068	ACUUGAAAGAGC&GCUUUUGGGAAUUCAGGU	((((((((((((&))))))......))))))	CAAUCUUUAAUCAGUGUGUAACAUUAGGGAGGACUUGAAAGAGCCACCACAUUUUCACCGAGGCCACGCGGAGUACGAUCGAGUGUACAGUGAACAAUGCUAGGGAGAGCUGCCUAUAUGGAAGAGCCCUAAUGUGUAAAAUUAAUUUUAGUAGUGCUAUCCCCAUGUGAUUUUAAUAGCUUCUUAGGAGAAUGACAAAAAAAAAAAAAAAAAAAAAAAAAAAAAAAAA	AGCUUUUGGGAAUUCAGGUAGU
NC_045512.2	28	33	28	33	3.46	hsa-miR-9903_MIMAT0039323	4	9	4	9	2.72	-3.76	-9.94	-0.441068	GGAGGA&UCCUCC	((((((&))))))	CAAUCUUUAAUCAGUGUGUAACAUUAGGGAGGACUUGAAAGAGCCACCACAUUUUCACCGAGGCCACGCGGAGUACGAUCGAGUGUACAGUGAACAAUGCUAGGGAGAGCUGCCUAUAUGGAAGAGCCCUAAUGUGUAAAAUUAAUUUUAGUAGUGCUAUCCCCAUGUGAUUUUAAUAGCUUCUUAGGAGAAUGACAAAAAAAAAAAAAAAAAAAAAAAAAAAAAAAAA	UUAUCCUCCAGUAGACUAGGGA
NC_045512.2	69	75	70	75	3.17	hsa-miR-3944-3p_MIMAT0018360	16	22	16	21	3.99	-3.75	-10.91	-0.437613	CGGAGUA&UGCUCCG	(((((((&)))))))	CAAUCUUUAAUCAGUGUGUAACAUUAGGGAGGACUUGAAAGAGCCACCACAUUUUCACCGAGGCCACGCGGAGUACGAUCGAGUGUACAGUGAACAAUGCUAGGGAGAGCUGCCUAUAUGGAAGAGCCCUAAUGUGUAAAAUUAAUUUUAGUAGUGCUAUCCCCAUGUGAUUUUAAUAGCUUCUUAGGAGAAUGACAAAAAAAAAAAAAAAAAAAAAAAAAAAAAAAAA	UUCGGGCUGGCCUGCUGCUCCGG
NC_045512.2	81	86	81	86	2.72	hsa-miR-574-3p_MIMAT0003239	2	7	2	7	1.43	-3.75	-7.9	-0.439895	GAGUGU&ACGCUC	((((((&))))))	CAAUCUUUAAUCAGUGUGUAACAUUAGGGAGGACUUGAAAGAGCCACCACAUUUUCACCGAGGCCACGCGGAGUACGAUCGAGUGUACAGUGAACAAUGCUAGGGAGAGCUGCCUAUAUGGAAGAGCCCUAAUGUGUAAAAUUAAUUUUAGUAGUGCUAUCCCCAUGUGAUUUUAAUAGCUUCUUAGGAGAAUGACAAAAAAAAAAAAAAAAAAAAAAAAAAAAAAAAA	CACGCUCAUGCACACACCCACA
NC_045512.2	195	201	195	200	0.49	hsa-miR-4423-5p_MIMAT0019232	8	14	9	14	0.1	-3.74	-4.33	-0.438722	ACAAAAA&UUUUUGU	(((((((&)))))))	CAAUCUUUAAUCAGUGUGUAACAUUAGGGAGGACUUGAAAGAGCCACCACAUUUUCACCGAGGCCACGCGGAGUACGAUCGAGUGUACAGUGAACAAUGCUAGGGAGAGCUGCCUAUAUGGAAGAGCCCUAAUGUGUAAAAUUAAUUUUAGUAGUGCUAUCCCCAUGUGAUUUUAAUAGCUUCUUAGGAGAAUGACAAAAAAAAAAAAAAAAAAAAAAAAAAAAAAAAA	AGUUGCCUUUUUGUUCCCAUGC
NC_045512.2	66	71	66	71	2.81	hsa-miR-378a-5p_MIMAT0000731	17	22	17	22	0	-3.73	-6.54	-0.437549	ACGCGG&CUGUGU	((((((&))))))	CAAUCUUUAAUCAGUGUGUAACAUUAGGGAGGACUUGAAAGAGCCACCACAUUUUCACCGAGGCCACGCGGAGUACGAUCGAGUGUACAGUGAACAAUGCUAGGGAGAGCUGCCUAUAUGGAAGAGCCCUAAUGUGUAAAAUUAAUUUUAGUAGUGCUAUCCCCAUGUGAUUUUAAUAGCUUCUUAGGAGAAUGACAAAAAAAAAAAAAAAAAAAAAAAAAAAAAAAAA	CUCCUGACUCCAGGUCCUGUGU
NC_045512.2	14	19	14	19	1.54	hsa-miR-380-5p_MIMAT0000734	15	20	15	20	0.2	-3.73	-5.47	-0.437549	GUGUGU&ACAUGC	((((((&))))))	CAAUCUUUAAUCAGUGUGUAACAUUAGGGAGGACUUGAAAGAGCCACCACAUUUUCACCGAGGCCACGCGGAGUACGAUCGAGUGUACAGUGAACAAUGCUAGGGAGAGCUGCCUAUAUGGAAGAGCCCUAAUGUGUAAAAUUAAUUUUAGUAGUGCUAUCCCCAUGUGAUUUUAAUAGCUUCUUAGGAGAAUGACAAAAAAAAAAAAAAAAAAAAAAAAAAAAAAAAA	UGGUUGACCAUAGAACAUGCGC
NC_045512.2	73	78	73	78	0.46	hsa-miR-93-5p_MIMAT0000093	12	17	12	17	2.91	-3.73	-7.1	-0.435279	GUACGA&UCGUGC	((((((&))))))	CAAUCUUUAAUCAGUGUGUAACAUUAGGGAGGACUUGAAAGAGCCACCACAUUUUCACCGAGGCCACGCGGAGUACGAUCGAGUGUACAGUGAACAAUGCUAGGGAGAGCUGCCUAUAUGGAAGAGCCCUAAUGUGUAAAAUUAAUUUUAGUAGUGCUAUCCCCAUGUGAUUUUAAUAGCUUCUUAGGAGAAUGACAAAAAAAAAAAAAAAAAAAAAAAAAAAAAAAAA	CAAAGUGCUGUUCGUGCAGGUAG
NC_045512.2	79	88	79	84	3.05	hsa-miR-223-5p_MIMAT0004570	2	11	6	11	0.52	-3.72	-7.29	-0.436376	UCGAGUGUAC&GUGUAUUUGA	((((((((((&))))))))))	CAAUCUUUAAUCAGUGUGUAACAUUAGGGAGGACUUGAAAGAGCCACCACAUUUUCACCGAGGCCACGCGGAGUACGAUCGAGUGUACAGUGAACAAUGCUAGGGAGAGCUGCCUAUAUGGAAGAGCCCUAAUGUGUAAAAUUAAUUUUAGUAGUGCUAUCCCCAUGUGAUUUUAAUAGCUUCUUAGGAGAAUGACAAAAAAAAAAAAAAAAAAAAAAAAAAAAAAAAA	CGUGUAUUUGACAAGCUGAGUU
NC_045512.2	151	156	151	156	2.05	hsa-miR-6807-3p_MIMAT0027515	1	6	1	6	1.65	-3.72	-7.42	-0.434112	GUAGUG&CACUGC	((((((&))))))	CAAUCUUUAAUCAGUGUGUAACAUUAGGGAGGACUUGAAAGAGCCACCACAUUUUCACCGAGGCCACGCGGAGUACGAUCGAGUGUACAGUGAACAAUGCUAGGGAGAGCUGCCUAUAUGGAAGAGCCCUAAUGUGUAAAAUUAAUUUUAGUAGUGCUAUCCCCAUGUGAUUUUAAUAGCUUCUUAGGAGAAUGACAAAAAAAAAAAAAAAAAAAAAAAAAAAAAAAAA	CACUGCAUUCCUGCUUGGCCCAG
NC_045512.2	151	156	151	156	2.05	hsa-miR-196b-3p_MIMAT0009201	13	18	13	18	1.26	-3.71	-7.02	-0.435203	GUAGUG&CACUGC	((((((&))))))	CAAUCUUUAAUCAGUGUGUAACAUUAGGGAGGACUUGAAAGAGCCACCACAUUUUCACCGAGGCCACGCGGAGUACGAUCGAGUGUACAGUGAACAAUGCUAGGGAGAGCUGCCUAUAUGGAAGAGCCCUAAUGUGUAAAAUUAAUUUUAGUAGUGCUAUCCCCAUGUGAUUUUAAUAGCUUCUUAGGAGAAUGACAAAAAAAAAAAAAAAAAAAAAAAAAAAAAAAAA	UCGACAGCACGACACUGCCUUC
NC_045512.2	193	198	193	198	0.58	hsa-miR-301b-3p_MIMAT0004958	14	19	14	19	1.89	-3.7	-6.17	-0.431778	UGACAA&UUGUCA	((((((&))))))	CAAUCUUUAAUCAGUGUGUAACAUUAGGGAGGACUUGAAAGAGCCACCACAUUUUCACCGAGGCCACGCGGAGUACGAUCGAGUGUACAGUGAACAAUGCUAGGGAGAGCUGCCUAUAUGGAAGAGCCCUAAUGUGUAAAAUUAAUUUUAGUAGUGCUAUCCCCAUGUGAUUUUAAUAGCUUCUUAGGAGAAUGACAAAAAAAAAAAAAAAAAAAAAAAAAAAAAAAAA	CAGUGCAAUGAUAUUGUCAAAGC
NC_045512.2	123	128	123	128	2.61	hsa-miR-597-3p_MIMAT0026619	2	7	2	7	0.55	-3.7	-6.86	-0.431778	AGAGCC&GGUUCU	((((((&))))))	CAAUCUUUAAUCAGUGUGUAACAUUAGGGAGGACUUGAAAGAGCCACCACAUUUUCACCGAGGCCACGCGGAGUACGAUCGAGUGUACAGUGAACAAUGCUAGGGAGAGCUGCCUAUAUGGAAGAGCCCUAAUGUGUAAAAUUAAUUUUAGUAGUGCUAUCCCCAUGUGAUUUUAAUAGCUUCUUAGGAGAAUGACAAAAAAAAAAAAAAAAAAAAAAAAAAAAAAAAA	UGGUUCUCUUGUGGCUCAAGCGU
NC_045512.2	132	138	133	138	1.32	hsa-miR-202-5p_MIMAT0002810	7	13	7	12	0.03	-3.69	-5.04	-0.432857	AUGUGUA&UGCAUAU	(((((((&)))))))	CAAUCUUUAAUCAGUGUGUAACAUUAGGGAGGACUUGAAAGAGCCACCACAUUUUCACCGAGGCCACGCGGAGUACGAUCGAGUGUACAGUGAACAAUGCUAGGGAGAGCUGCCUAUAUGGAAGAGCCCUAAUGUGUAAAAUUAAUUUUAGUAGUGCUAUCCCCAUGUGAUUUUAAUAGCUUCUUAGGAGAAUGACAAAAAAAAAAAAAAAAAAAAAAAAAAAAAAAAA	UUCCUAUGCAUAUACUUCUUUG
NC_045512.2	177	182	177	182	2.04	hsa-miR-590-3p_MIMAT0004801	14	19	14	19	0.13	-3.68	-5.85	-0.434052	UAGCUU&AAGCUA	((((((&))))))	CAAUCUUUAAUCAGUGUGUAACAUUAGGGAGGACUUGAAAGAGCCACCACAUUUUCACCGAGGCCACGCGGAGUACGAUCGAGUGUACAGUGAACAAUGCUAGGGAGAGCUGCCUAUAUGGAAGAGCCCUAAUGUGUAAAAUUAAUUUUAGUAGUGCUAUCCCCAUGUGAUUUUAAUAGCUUCUUAGGAGAAUGACAAAAAAAAAAAAAAAAAAAAAAAAAAAAAAAAA	UAAUUUUAUGUAUAAGCUAGU
NC_045512.2	82	88	83	88	2.71	hsa-miR-34a-3p_MIMAT0004557	11	17	11	16	1.29	-3.67	-7.67	-0.43051	AGUGUAC&GUAUACU	(((((((&)))))))	CAAUCUUUAAUCAGUGUGUAACAUUAGGGAGGACUUGAAAGAGCCACCACAUUUUCACCGAGGCCACGCGGAGUACGAUCGAGUGUACAGUGAACAAUGCUAGGGAGAGCUGCCUAUAUGGAAGAGCCCUAAUGUGUAAAAUUAAUUUUAGUAGUGCUAUCCCCAUGUGAUUUUAAUAGCUUCUUAGGAGAAUGACAAAAAAAAAAAAAAAAAAAAAAAAAAAAAAAAA	CAAUCAGCAAGUAUACUGCCCU
NC_045512.2	178	190	185	190	4.36	hsa-let-7e-3p_MIMAT0004485	10	18	10	15	1.4	-3.66	-9.42	-0.429337	AGCUUCUUAGGAG&CUCCUAGCU	(((....((((((&)))))))))	CAAUCUUUAAUCAGUGUGUAACAUUAGGGAGGACUUGAAAGAGCCACCACAUUUUCACCGAGGCCACGCGGAGUACGAUCGAGUGUACAGUGAACAAUGCUAGGGAGAGCUGCCUAUAUGGAAGAGCCCUAAUGUGUAAAAUUAAUUUUAGUAGUGCUAUCCCCAUGUGAUUUUAAUAGCUUCUUAGGAGAAUGACAAAAAAAAAAAAAAAAAAAAAAAAAAAAAAAAA	CUAUACGGCCUCCUAGCUUUCC
NC_045512.2	108	113	108	113	1.44	hsa-miR-548av-3p_MIMAT0022304	7	12	7	12	1.83	-3.66	-6.93	-0.434192	AGCUGC&GCAGUU	((((((&))))))	CAAUCUUUAAUCAGUGUGUAACAUUAGGGAGGACUUGAAAGAGCCACCACAUUUUCACCGAGGCCACGCGGAGUACGAUCGAGUGUACAGUGAACAAUGCUAGGGAGAGCUGCCUAUAUGGAAGAGCCCUAAUGUGUAAAAUUAAUUUUAGUAGUGCUAUCCCCAUGUGAUUUUAAUAGCUUCUUAGGAGAAUGACAAAAAAAAAAAAAAAAAAAAAAAAAAAAAAAAA	AAAACUGCAGUUACUUUUGC
NC_045512.2	108	113	108	113	1.44	hsa-miR-548ar-3p_MIMAT0022266	8	13	8	13	1.83	-3.66	-6.93	-0.431693	AGCUGC&GCAGUU	((((((&))))))	CAAUCUUUAAUCAGUGUGUAACAUUAGGGAGGACUUGAAAGAGCCACCACAUUUUCACCGAGGCCACGCGGAGUACGAUCGAGUGUACAGUGAACAAUGCUAGGGAGAGCUGCCUAUAUGGAAGAGCCCUAAUGUGUAAAAUUAAUUUUAGUAGUGCUAUCCCCAUGUGAUUUUAAUAGCUUCUUAGGAGAAUGACAAAAAAAAAAAAAAAAAAAAAAAAAAAAAAAAA	UAAAACUGCAGUUAUUUUUGC
NC_045512.2	82	96	91	96	3.42	hsa-miR-199a-5p_MIMAT0000231	6	19	6	11	2.15	-3.65	-9.22	-0.425943	AGUGUACAGUGAACA&UGUUCAGACUACCU	((.(((...((((((&))))))...)))))	CAAUCUUUAAUCAGUGUGUAACAUUAGGGAGGACUUGAAAGAGCCACCACAUUUUCACCGAGGCCACGCGGAGUACGAUCGAGUGUACAGUGAACAAUGCUAGGGAGAGCUGCCUAUAUGGAAGAGCCCUAAUGUGUAAAAUUAAUUUUAGUAGUGCUAUCCCCAUGUGAUUUUAAUAGCUUCUUAGGAGAAUGACAAAAAAAAAAAAAAAAAAAAAAAAAAAAAAAAA	CCCAGUGUUCAGACUACCUGUUC
NC_045512.2	2	25	3	8	2.64	hsa-miR-155-5p_MIMAT0000646	3	24	18	23	1.41	-3.64	-7.69	-0.422677	AAUCUUUAAUCAGUGUGUAACAUU&AAUGCUAAUCGUGAUAGGGGUU	(((((((.((((.....((.((((&)))).))....)))))))))))	CAAUCUUUAAUCAGUGUGUAACAUUAGGGAGGACUUGAAAGAGCCACCACAUUUUCACCGAGGCCACGCGGAGUACGAUCGAGUGUACAGUGAACAAUGCUAGGGAGAGCUGCCUAUAUGGAAGAGCCCUAAUGUGUAAAAUUAAUUUUAGUAGUGCUAUCCCCAUGUGAUUUUAAUAGCUUCUUAGGAGAAUGACAAAAAAAAAAAAAAAAAAAAAAAAAAAAAAAAA	UUAAUGCUAAUCGUGAUAGGGGUU
NC_045512.2	119	139	134	139	3.92	hsa-miR-491-3p_MIMAT0004765	2	21	2	7	1.07	-3.64	-8.63	-0.426991	UGGAAGAGCCCUAAUGUGUAA&UUAUGCAAGAUUCCCUUCUA	((((((........(((((((&))))))).......))))))	CAAUCUUUAAUCAGUGUGUAACAUUAGGGAGGACUUGAAAGAGCCACCACAUUUUCACCGAGGCCACGCGGAGUACGAUCGAGUGUACAGUGAACAAUGCUAGGGAGAGCUGCCUAUAUGGAAGAGCCCUAAUGUGUAAAAUUAAUUUUAGUAGUGCUAUCCCCAUGUGAUUUUAAUAGCUUCUUAGGAGAAUGACAAAAAAAAAAAAAAAAAAAAAAAAAAAAAAAAA	CUUAUGCAAGAUUCCCUUCUAC
NC_045512.2	40	57	52	57	4.32	hsa-miR-589-5p_MIMAT0004799	1	19	1	6	1.36	-3.64	-9.32	-0.426991	AGAGCCACCACAUUUUCA&UGAGAACCACGUCUGCUCU	(((((.((....((((((&))))))....))..)))))	CAAUCUUUAAUCAGUGUGUAACAUUAGGGAGGACUUGAAAGAGCCACCACAUUUUCACCGAGGCCACGCGGAGUACGAUCGAGUGUACAGUGAACAAUGCUAGGGAGAGCUGCCUAUAUGGAAGAGCCCUAAUGUGUAAAAUUAAUUUUAGUAGUGCUAUCCCCAUGUGAUUUUAAUAGCUUCUUAGGAGAAUGACAAAAAAAAAAAAAAAAAAAAAAAAAAAAAAAAA	UGAGAACCACGUCUGCUCUGAG
NC_045512.2	166	171	166	171	2.17	hsa-miR-122-3p_MIMAT0004590	10	15	10	15	0.02	-3.62	-5.81	-0.424645	UGUGAU&AUCACA	((((((&))))))	CAAUCUUUAAUCAGUGUGUAACAUUAGGGAGGACUUGAAAGAGCCACCACAUUUUCACCGAGGCCACGCGGAGUACGAUCGAGUGUACAGUGAACAAUGCUAGGGAGAGCUGCCUAUAUGGAAGAGCCCUAAUGUGUAAAAUUAAUUUUAGUAGUGCUAUCCCCAUGUGAUUUUAAUAGCUUCUUAGGAGAAUGACAAAAAAAAAAAAAAAAAAAAAAAAAAAAAAAAA	AACGCCAUUAUCACACUAAAUA
NC_045512.2	116	136	116	121	4.82	hsa-miR-376b-3p_MIMAT0002172	3	21	16	21	1.94	-3.62	-10.38	-0.424645	AUAUGGAAGAGCCCUAAUGUG&CAUAGAGGAAAAUCCAUGU	(((((((....((....((((&))))..))....)))))))	CAAUCUUUAAUCAGUGUGUAACAUUAGGGAGGACUUGAAAGAGCCACCACAUUUUCACCGAGGCCACGCGGAGUACGAUCGAGUGUACAGUGAACAAUGCUAGGGAGAGCUGCCUAUAUGGAAGAGCCCUAAUGUGUAAAAUUAAUUUUAGUAGUGCUAUCCCCAUGUGAUUUUAAUAGCUUCUUAGGAGAAUGACAAAAAAAAAAAAAAAAAAAAAAAAAAAAAAAAA	AUCAUAGAGGAAAAUCCAUGUU
NC_045512.2	153	158	153	158	2.25	hsa-miR-548av-5p_MIMAT0022303	4	9	4	9	0.14	-3.62	-6.01	-0.434882	AGUGCU&AGUACU	((((((&))))))	CAAUCUUUAAUCAGUGUGUAACAUUAGGGAGGACUUGAAAGAGCCACCACAUUUUCACCGAGGCCACGCGGAGUACGAUCGAGUGUACAGUGAACAAUGCUAGGGAGAGCUGCCUAUAUGGAAGAGCCCUAAUGUGUAAAAUUAAUUUUAGUAGUGCUAUCCCCAUGUGAUUUUAAUAGCUUCUUAGGAGAAUGACAAAAAAAAAAAAAAAAAAAAAAAAAAAAAAAAA	AAAAGUACUUGCGGAUUU
NC_045512.2	20	27	22	27	1.26	hsa-miR-21-5p_MIMAT0000076	13	20	13	18	2.03	-3.61	-6.9	-0.423472	AACAUUAG&CUGAUGUU	((((((((&))))))))	CAAUCUUUAAUCAGUGUGUAACAUUAGGGAGGACUUGAAAGAGCCACCACAUUUUCACCGAGGCCACGCGGAGUACGAUCGAGUGUACAGUGAACAAUGCUAGGGAGAGCUGCCUAUAUGGAAGAGCCCUAAUGUGUAAAAUUAAUUUUAGUAGUGCUAUCCCCAUGUGAUUUUAAUAGCUUCUUAGGAGAAUGACAAAAAAAAAAAAAAAAAAAAAAAAAAAAAAAAA	UAGCUUAUCAGACUGAUGUUGA
NC_045512.2	178	196	178	183	5.11	hsa-miR-125b-1-3p_MIMAT0004592	5	22	17	22	5.35	-3.6	-14.06	-0.422299	AGCUUCUUAGGAGAAUGAC&GUUAGGCUCUUGGGAGCU	((((((..((.((..((((&))))..))))..))))))	CAAUCUUUAAUCAGUGUGUAACAUUAGGGAGGACUUGAAAGAGCCACCACAUUUUCACCGAGGCCACGCGGAGUACGAUCGAGUGUACAGUGAACAAUGCUAGGGAGAGCUGCCUAUAUGGAAGAGCCCUAAUGUGUAAAAUUAAUUUUAGUAGUGCUAUCCCCAUGUGAUUUUAAUAGCUUCUUAGGAGAAUGACAAAAAAAAAAAAAAAAAAAAAAAAAAAAAAAAA	ACGGGUUAGGCUCUUGGGAGCU
NC_045512.2	121	127	122	127	3.11	hsa-miR-146a-3p_MIMAT0004608	14	20	14	19	2.06	-3.6	-8.77	-0.422299	GAAGAGC&GUUCUUC	(((((((&)))))))	CAAUCUUUAAUCAGUGUGUAACAUUAGGGAGGACUUGAAAGAGCCACCACAUUUUCACCGAGGCCACGCGGAGUACGAUCGAGUGUACAGUGAACAAUGCUAGGGAGAGCUGCCUAUAUGGAAGAGCCCUAAUGUGUAAAAUUAAUUUUAGUAGUGCUAUCCCCAUGUGAUUUUAAUAGCUUCUUAGGAGAAUGACAAAAAAAAAAAAAAAAAAAAAAAAAAAAAAAAA	CCUCUGAAAUUCAGUUCUUCAG
NC_045512.2	153	159	153	158	2.39	hsa-miR-93-3p_MIMAT0004509	11	17	12	17	3.03	-3.6	-9.02	-0.422299	AGUGCUA&UAGCACU	(((((((&)))))))	CAAUCUUUAAUCAGUGUGUAACAUUAGGGAGGACUUGAAAGAGCCACCACAUUUUCACCGAGGCCACGCGGAGUACGAUCGAGUGUACAGUGAACAAUGCUAGGGAGAGCUGCCUAUAUGGAAGAGCCCUAAUGUGUAAAAUUAAUUUUAGUAGUGCUAUCCCCAUGUGAUUUUAAUAGCUUCUUAGGAGAAUGACAAAAAAAAAAAAAAAAAAAAAAAAAAAAAAAAA	ACUGCUGAGCUAGCACUUCCCG
NC_045512.2	93	108	103	108	5.61	hsa-miR-141-5p_MIMAT0004598	3	19	3	8	3.01	-3.59	-12.21	-0.421126	AACAAUGCUAGGGAGA&UCUUCCAGUACAGUGUU	((((.((((.((((((&))))))))))...))))	CAAUCUUUAAUCAGUGUGUAACAUUAGGGAGGACUUGAAAGAGCCACCACAUUUUCACCGAGGCCACGCGGAGUACGAUCGAGUGUACAGUGAACAAUGCUAGGGAGAGCUGCCUAUAUGGAAGAGCCCUAAUGUGUAAAAUUAAUUUUAGUAGUGCUAUCCCCAUGUGAUUUUAAUAGCUUCUUAGGAGAAUGACAAAAAAAAAAAAAAAAAAAAAAAAAAAAAAAAA	CAUCUUCCAGUACAGUGUUGGA
NC_045512.2	2	19	14	19	2.58	hsa-miR-501-3p_MIMAT0004774	2	20	2	7	2.32	-3.59	-8.49	-0.421126	AAUCUUUAAUCAGUGUGU&AUGCACCCGGGCAAGGAUU	(((((((.....((((((&))))))......)))))))	CAAUCUUUAAUCAGUGUGUAACAUUAGGGAGGACUUGAAAGAGCCACCACAUUUUCACCGAGGCCACGCGGAGUACGAUCGAGUGUACAGUGAACAAUGCUAGGGAGAGCUGCCUAUAUGGAAGAGCCCUAAUGUGUAAAAUUAAUUUUAGUAGUGCUAUCCCCAUGUGAUUUUAAUAGCUUCUUAGGAGAAUGACAAAAAAAAAAAAAAAAAAAAAAAAAAAAAAAAA	AAUGCACCCGGGCAAGGAUUCU
NC_045512.2	117	127	118	123	3.64	hsa-miR-192-3p_MIMAT0004543	3	14	8	13	1.43	-3.58	-8.65	-0.419953	UAUGGAAGAGC&GCCAAUUCCAUA	(((((((..((&))...)))))))	CAAUCUUUAAUCAGUGUGUAACAUUAGGGAGGACUUGAAAGAGCCACCACAUUUUCACCGAGGCCACGCGGAGUACGAUCGAGUGUACAGUGAACAAUGCUAGGGAGAGCUGCCUAUAUGGAAGAGCCCUAAUGUGUAAAAUUAAUUUUAGUAGUGCUAUCCCCAUGUGAUUUUAAUAGCUUCUUAGGAGAAUGACAAAAAAAAAAAAAAAAAAAAAAAAAAAAAAAAA	CUGCCAAUUCCAUAGGUCACAG
NC_045512.2	119	125	119	124	3.06	hsa-miR-141-5p_MIMAT0004598	3	9	4	9	2.68	-3.57	-9.31	-0.41878	UGGAAGA&UCUUCCA	(((((((&)))))))	CAAUCUUUAAUCAGUGUGUAACAUUAGGGAGGACUUGAAAGAGCCACCACAUUUUCACCGAGGCCACGCGGAGUACGAUCGAGUGUACAGUGAACAAUGCUAGGGAGAGCUGCCUAUAUGGAAGAGCCCUAAUGUGUAAAAUUAAUUUUAGUAGUGCUAUCCCCAUGUGAUUUUAAUAGCUUCUUAGGAGAAUGACAAAAAAAAAAAAAAAAAAAAAAAAAAAAAAAAA	CAUCUUCCAGUACAGUGUUGGA
NC_045512.2	151	156	151	156	2.05	hsa-miR-323a-3p_MIMAT0000755	3	8	3	8	0.03	-3.57	-5.65	-0.421078	GUAGUG&CAUUAC	((((((&))))))	CAAUCUUUAAUCAGUGUGUAACAUUAGGGAGGACUUGAAAGAGCCACCACAUUUUCACCGAGGCCACGCGGAGUACGAUCGAGUGUACAGUGAACAAUGCUAGGGAGAGCUGCCUAUAUGGAAGAGCCCUAAUGUGUAAAAUUAAUUUUAGUAGUGCUAUCCCCAUGUGAUUUUAAUAGCUUCUUAGGAGAAUGACAAAAAAAAAAAAAAAAAAAAAAAAAAAAAAAAA	CACAUUACACGGUCGACCUCU
NC_045512.2	133	138	133	138	1.21	hsa-miR-4761-3p_MIMAT0019909	8	13	8	13	0.15	-3.57	-4.93	-0.421078	UGUGUA&UGCGCA	((((((&))))))	CAAUCUUUAAUCAGUGUGUAACAUUAGGGAGGACUUGAAAGAGCCACCACAUUUUCACCGAGGCCACGCGGAGUACGAUCGAGUGUACAGUGAACAAUGCUAGGGAGAGCUGCCUAUAUGGAAGAGCCCUAAUGUGUAAAAUUAAUUUUAGUAGUGCUAUCCCCAUGUGAUUUUAAUAGCUUCUUAGGAGAAUGACAAAAAAAAAAAAAAAAAAAAAAAAAAAAAAAAA	GAGGGCAUGCGCACUUUGUCC
NC_045512.2	89	101	91	96	2.59	hsa-miR-545-5p_MIMAT0004785	3	16	9	14	0.82	-3.57	-6.98	-0.41878	AGUGAACAAUGCU&AGUAAAUGUUUAUU	((((((((.((((&))))..))))))))	CAAUCUUUAAUCAGUGUGUAACAUUAGGGAGGACUUGAAAGAGCCACCACAUUUUCACCGAGGCCACGCGGAGUACGAUCGAGUGUACAGUGAACAAUGCUAGGGAGAGCUGCCUAUAUGGAAGAGCCCUAAUGUGUAAAAUUAAUUUUAGUAGUGCUAUCCCCAUGUGAUUUUAAUAGCUUCUUAGGAGAAUGACAAAAAAAAAAAAAAAAAAAAAAAAAAAAAAAAA	UCAGUAAAUGUUUAUUAGAUGA
NC_045512.2	123	129	123	128	3.02	hsa-miR-193b-5p_MIMAT0004767	3	9	4	9	1.98	-3.56	-8.56	-0.417607	AGAGCCC&GGGUUUU	(((((((&)))))))	CAAUCUUUAAUCAGUGUGUAACAUUAGGGAGGACUUGAAAGAGCCACCACAUUUUCACCGAGGCCACGCGGAGUACGAUCGAGUGUACAGUGAACAAUGCUAGGGAGAGCUGCCUAUAUGGAAGAGCCCUAAUGUGUAAAAUUAAUUUUAGUAGUGCUAUCCCCAUGUGAUUUUAAUAGCUUCUUAGGAGAAUGACAAAAAAAAAAAAAAAAAAAAAAAAAAAAAAAAA	CGGGGUUUUGAGGGCGAGAUGA
NC_045512.2	27	38	33	38	4.17	hsa-miR-219a-1-3p_MIMAT0004567	5	21	5	10	1.94	-3.56	-9.67	-0.417607	GGGAGGACUUGA&UUGAGUCUGGACGUCCC	((((.(((((((&)))))))......))))	CAAUCUUUAAUCAGUGUGUAACAUUAGGGAGGACUUGAAAGAGCCACCACAUUUUCACCGAGGCCACGCGGAGUACGAUCGAGUGUACAGUGAACAAUGCUAGGGAGAGCUGCCUAUAUGGAAGAGCCCUAAUGUGUAAAAUUAAUUUUAGUAGUGCUAUCCCCAUGUGAUUUUAAUAGCUUCUUAGGAGAAUGACAAAAAAAAAAAAAAAAAAAAAAAAAAAAAAAAA	AGAGUUGAGUCUGGACGUCCCG
NC_045512.2	183	188	183	188	2.8	hsa-miR-550a-3-5p_MIMAT0020925	5	10	5	10	1.11	-3.54	-7.45	-0.419956	CUUAGG&CCUGAG	((((((&))))))	CAAUCUUUAAUCAGUGUGUAACAUUAGGGAGGACUUGAAAGAGCCACCACAUUUUCACCGAGGCCACGCGGAGUACGAUCGAGUGUACAGUGAACAAUGCUAGGGAGAGCUGCCUAUAUGGAAGAGCCCUAAUGUGUAAAAUUAAUUUUAGUAGUGCUAUCCCCAUGUGAUUUUAAUAGCUUCUUAGGAGAAUGACAAAAAAAAAAAAAAAAAAAAAAAAAAAAAAAAA	AGUGCCUGAGGGAGUAAGAG
NC_045512.2	163	183	178	183	5.57	hsa-miR-4670-3p_MIMAT0019751	2	16	2	7	2.03	-3.52	-11.12	-0.412915	CCAUGUGAUUUUAAUAGCUUC&GAAGUUACAUCAUGG	(((((((.......(((((((&))))))))).)))))	CAAUCUUUAAUCAGUGUGUAACAUUAGGGAGGACUUGAAAGAGCCACCACAUUUUCACCGAGGCCACGCGGAGUACGAUCGAGUGUACAGUGAACAAUGCUAGGGAGAGCUGCCUAUAUGGAAGAGCCCUAAUGUGUAAAAUUAAUUUUAGUAGUGCUAUCCCCAUGUGAUUUUAAUAGCUUCUUAGGAGAAUGACAAAAAAAAAAAAAAAAAAAAAAAAAAAAAAAAA	UGAAGUUACAUCAUGGUCGCUU
NC_045512.2	119	128	123	128	3.41	hsa-miR-548ax_MIMAT0022474	13	22	13	18	1.89	-3.52	-8.82	-0.412915	UGGAAGAGCC&GGUUUUGCCA	(((.((((((&)))))).)))	CAAUCUUUAAUCAGUGUGUAACAUUAGGGAGGACUUGAAAGAGCCACCACAUUUUCACCGAGGCCACGCGGAGUACGAUCGAGUGUACAGUGAACAAUGCUAGGGAGAGCUGCCUAUAUGGAAGAGCCCUAAUGUGUAAAAUUAAUUUUAGUAGUGCUAUCCCCAUGUGAUUUUAAUAGCUUCUUAGGAGAAUGACAAAAAAAAAAAAAAAAAAAAAAAAAAAAAAAAA	AGAAGUAAUUGCGGUUUUGCCA
NC_045512.2	78	83	78	83	0.67	hsa-miR-26a-2-3p_MIMAT0004681	7	12	7	12	0.07	-3.51	-4.25	-0.411742	AUCGAG&CUUGAU	((((((&))))))	CAAUCUUUAAUCAGUGUGUAACAUUAGGGAGGACUUGAAAGAGCCACCACAUUUUCACCGAGGCCACGCGGAGUACGAUCGAGUGUACAGUGAACAAUGCUAGGGAGAGCUGCCUAUAUGGAAGAGCCCUAAUGUGUAAAAUUAAUUUUAGUAGUGCUAUCCCCAUGUGAUUUUAAUAGCUUCUUAGGAGAAUGACAAAAAAAAAAAAAAAAAAAAAAAAAAAAAAAAA	CCUAUUCUUGAUUACUUGUUUC
NC_045512.2	182	197	183	188	4.51	hsa-miR-1301-3p_MIMAT0005797	2	16	10	15	2.75	-3.49	-10.75	-0.405259	UCUUAGGAGAAUGACA&UGCAGCUGCCUGGGA	(((((((....((.((&))))....)))))))	CAAUCUUUAAUCAGUGUGUAACAUUAGGGAGGACUUGAAAGAGCCACCACAUUUUCACCGAGGCCACGCGGAGUACGAUCGAGUGUACAGUGAACAAUGCUAGGGAGAGCUGCCUAUAUGGAAGAGCCCUAAUGUGUAAAAUUAAUUUUAGUAGUGCUAUCCCCAUGUGAUUUUAAUAGCUUCUUAGGAGAAUGACAAAAAAAAAAAAAAAAAAAAAAAAAAAAAAAAA	UUGCAGCUGCCUGGGAGUGACUUC
NC_045512.2	65	75	70	75	4	hsa-miR-135a-5p_MIMAT0000428	11	22	11	16	0.54	-3.49	-8.03	-0.407272	CACGCGGAGUA&UAUUCCUAUGUG	(((..((((((&))))))...)))	CAAUCUUUAAUCAGUGUGUAACAUUAGGGAGGACUUGAAAGAGCCACCACAUUUUCACCGAGGCCACGCGGAGUACGAUCGAGUGUACAGUGAACAAUGCUAGGGAGAGCUGCCUAUAUGGAAGAGCCCUAAUGUGUAAAAUUAAUUUUAGUAGUGCUAUCCCCAUGUGAUUUUAAUAGCUUCUUAGGAGAAUGACAAAAAAAAAAAAAAAAAAAAAAAAAAAAAAAAA	UAUGGCUUUUUAUUCCUAUGUGA
NC_045512.2	179	188	181	186	3.05	hsa-miR-137-3p_MIMAT0000429	7	19	9	14	1.15	-3.49	-7.69	-0.407272	GCUUCUUAGG&CUUAAGAAUACGC	((((((((((&))))))))...))	CAAUCUUUAAUCAGUGUGUAACAUUAGGGAGGACUUGAAAGAGCCACCACAUUUUCACCGAGGCCACGCGGAGUACGAUCGAGUGUACAGUGAACAAUGCUAGGGAGAGCUGCCUAUAUGGAAGAGCCCUAAUGUGUAAAAUUAAUUUUAGUAGUGCUAUCCCCAUGUGAUUUUAAUAGCUUCUUAGGAGAAUGACAAAAAAAAAAAAAAAAAAAAAAAAAAAAAAAAA	UUAUUGCUUAAGAAUACGCGUAG
NC_045512.2	39	47	39	44	1.74	hsa-miR-548b-3p_MIMAT0003254	12	20	15	20	1.02	-3.49	-6.25	-0.409395	AAGAGCCAC&GUUGCUUUU	((((((.((&)).))))))	CAAUCUUUAAUCAGUGUGUAACAUUAGGGAGGACUUGAAAGAGCCACCACAUUUUCACCGAGGCCACGCGGAGUACGAUCGAGUGUACAGUGAACAAUGCUAGGGAGAGCUGCCUAUAUGGAAGAGCCCUAAUGUGUAAAAUUAAUUUUAGUAGUGCUAUCCCCAUGUGAUUUUAAUAGCUUCUUAGGAGAAUGACAAAAAAAAAAAAAAAAAAAAAAAAAAAAAAAAA	CAAGAACCUCAGUUGCUUUUGU
NC_045512.2	4	9	4	9	0.57	hsa-miR-1276_MIMAT0005930	1	6	1	6	0.03	-3.46	-4.06	-0.410465	UCUUUA&UAAAGA	((((((&))))))	CAAUCUUUAAUCAGUGUGUAACAUUAGGGAGGACUUGAAAGAGCCACCACAUUUUCACCGAGGCCACGCGGAGUACGAUCGAGUGUACAGUGAACAAUGCUAGGGAGAGCUGCCUAUAUGGAAGAGCCCUAAUGUGUAAAAUUAAUUUUAGUAGUGCUAUCCCCAUGUGAUUUUAAUAGCUUCUUAGGAGAAUGACAAAAAAAAAAAAAAAAAAAAAAAAAAAAAAAAA	UAAAGAGCCCUGUGGAGACA
NC_045512.2	40	45	40	45	1.32	hsa-miR-4707-3p_MIMAT0019808	17	22	17	22	3.28	-3.45	-8.05	-0.404703	AGAGCC&GGUUCU	((((((&))))))	CAAUCUUUAAUCAGUGUGUAACAUUAGGGAGGACUUGAAAGAGCCACCACAUUUUCACCGAGGCCACGCGGAGUACGAUCGAGUGUACAGUGAACAAUGCUAGGGAGAGCUGCCUAUAUGGAAGAGCCCUAAUGUGUAAAAUUAAUUUUAGUAGUGCUAUCCCCAUGUGAUUUUAAUAGCUUCUUAGGAGAAUGACAAAAAAAAAAAAAAAAAAAAAAAAAAAAAAAAA	AGCCCGCCCCAGCCGAGGUUCU
NC_045512.2	153	158	153	158	2.25	hsa-miR-518e-3p_MIMAT0002861	3	8	3	8	1.89	-3.44	-7.58	-0.405744	AGUGCU&AGCGCU	((((((&))))))	CAAUCUUUAAUCAGUGUGUAACAUUAGGGAGGACUUGAAAGAGCCACCACAUUUUCACCGAGGCCACGCGGAGUACGAUCGAGUGUACAGUGAACAAUGCUAGGGAGAGCUGCCUAUAUGGAAGAGCCCUAAUGUGUAAAAUUAAUUUUAGUAGUGCUAUCCCCAUGUGAUUUUAAUAGCUUCUUAGGAGAAUGACAAAAAAAAAAAAAAAAAAAAAAAAAAAAAAAAA	AAAGCGCUUCCCUUCAGAGUG
NC_045512.2	85	90	85	90	2.01	hsa-let-7g-3p_MIMAT0004584	1	6	1	6	0.83	-3.43	-6.27	-0.404565	GUACAG&CUGUAC	((((((&))))))	CAAUCUUUAAUCAGUGUGUAACAUUAGGGAGGACUUGAAAGAGCCACCACAUUUUCACCGAGGCCACGCGGAGUACGAUCGAGUGUACAGUGAACAAUGCUAGGGAGAGCUGCCUAUAUGGAAGAGCCCUAAUGUGUAAAAUUAAUUUUAGUAGUGCUAUCCCCAUGUGAUUUUAAUAGCUUCUUAGGAGAAUGACAAAAAAAAAAAAAAAAAAAAAAAAAAAAAAAAA	CUGUACAGGCCACUGCCUUGC
NC_045512.2	56	61	56	61	2.37	hsa-miR-181d-5p_MIMAT0002821	15	20	15	20	3.63	-3.41	-9.41	-0.397936	CACCGA&UCGGUG	((((((&))))))	CAAUCUUUAAUCAGUGUGUAACAUUAGGGAGGACUUGAAAGAGCCACCACAUUUUCACCGAGGCCACGCGGAGUACGAUCGAGUGUACAGUGAACAAUGCUAGGGAGAGCUGCCUAUAUGGAAGAGCCCUAAUGUGUAAAAUUAAUUUUAGUAGUGCUAUCCCCAUGUGAUUUUAAUAGCUUCUUAGGAGAAUGACAAAAAAAAAAAAAAAAAAAAAAAAAAAAAAAAA	AACAUUCAUUGUUGUCGGUGGGU
NC_045512.2	139	152	147	152	1.6	hsa-miR-653-3p_MIMAT0026625	4	17	4	9	1.3	-3.41	-6.31	-0.400011	AAAUUAAUUUUAGU&ACUGGAGUUUGUUU	(((..(((((((((&)))))))))..)))	CAAUCUUUAAUCAGUGUGUAACAUUAGGGAGGACUUGAAAGAGCCACCACAUUUUCACCGAGGCCACGCGGAGUACGAUCGAGUGUACAGUGAACAAUGCUAGGGAGAGCUGCCUAUAUGGAAGAGCCCUAAUGUGUAAAAUUAAUUUUAGUAGUGCUAUCCCCAUGUGAUUUUAAUAGCUUCUUAGGAGAAUGACAAAAAAAAAAAAAAAAAAAAAAAAAAAAAAAAA	UUCACUGGAGUUUGUUUCAAUA
NC_045512.2	110	115	110	115	2.5	hsa-miR-2467-3p_MIMAT0019953	6	11	6	11	3.84	-3.4	-9.74	-0.398838	CUGCCU&AGGCAG	((((((&))))))	CAAUCUUUAAUCAGUGUGUAACAUUAGGGAGGACUUGAAAGAGCCACCACAUUUUCACCGAGGCCACGCGGAGUACGAUCGAGUGUACAGUGAACAAUGCUAGGGAGAGCUGCCUAUAUGGAAGAGCCCUAAUGUGUAAAAUUAAUUUUAGUAGUGCUAUCCCCAUGUGAUUUUAAUAGCUUCUUAGGAGAAUGACAAAAAAAAAAAAAAAAAAAAAAAAAAAAAAAAA	AGCAGAGGCAGAGAGGCUCAGG
NC_045512.2	120	128	123	128	3.22	hsa-miR-152-5p_MIMAT0026479	2	19	2	7	1.91	-3.39	-8.52	-0.395602	GGAAGAGCC&GGUUCUGUGAUACACUCC	(((((((((&)))))).........)))	CAAUCUUUAAUCAGUGUGUAACAUUAGGGAGGACUUGAAAGAGCCACCACAUUUUCACCGAGGCCACGCGGAGUACGAUCGAGUGUACAGUGAACAAUGCUAGGGAGAGCUGCCUAUAUGGAAGAGCCCUAAUGUGUAAAAUUAAUUUUAGUAGUGCUAUCCCCAUGUGAUUUUAAUAGCUUCUUAGGAGAAUGACAAAAAAAAAAAAAAAAAAAAAAAAAAAAAAAAA	AGGUUCUGUGAUACACUCCGACU
NC_045512.2	133	139	133	138	1.25	hsa-miR-153-3p_MIMAT0000439	1	7	2	7	0	-3.39	-4.64	-0.397665	UGUGUAA&UUGCAUA	(((((((&)))))))	CAAUCUUUAAUCAGUGUGUAACAUUAGGGAGGACUUGAAAGAGCCACCACAUUUUCACCGAGGCCACGCGGAGUACGAUCGAGUGUACAGUGAACAAUGCUAGGGAGAGCUGCCUAUAUGGAAGAGCCCUAAUGUGUAAAAUUAAUUUUAGUAGUGCUAUCCCCAUGUGAUUUUAAUAGCUUCUUAGGAGAAUGACAAAAAAAAAAAAAAAAAAAAAAAAAAAAAAAAA	UUGCAUAGUCACAAAAGUGAUC
NC_045512.2	60	65	60	65	2.45	hsa-miR-337-5p_MIMAT0004695	5	10	5	10	3.8	-3.39	-9.64	-0.399847	GAGGCC&GGCUUC	((((((&))))))	CAAUCUUUAAUCAGUGUGUAACAUUAGGGAGGACUUGAAAGAGCCACCACAUUUUCACCGAGGCCACGCGGAGUACGAUCGAGUGUACAGUGAACAAUGCUAGGGAGAGCUGCCUAUAUGGAAGAGCCCUAAUGUGUAAAAUUAAUUUUAGUAGUGCUAUCCCCAUGUGAUUUUAAUAGCUUCUUAGGAGAAUGACAAAAAAAAAAAAAAAAAAAAAAAAAAAAAAAAA	GAACGGCUUCAUACAGGAGUU
NC_045512.2	105	112	105	110	2.04	hsa-miR-1537-5p_MIMAT0026765	14	21	16	21	2.11	-3.38	-7.53	-0.396492	GAGAGCUG&CAGUUUUC	((((((((&))))))))	CAAUCUUUAAUCAGUGUGUAACAUUAGGGAGGACUUGAAAGAGCCACCACAUUUUCACCGAGGCCACGCGGAGUACGAUCGAGUGUACAGUGAACAAUGCUAGGGAGAGCUGCCUAUAUGGAAGAGCCCUAAUGUGUAAAAUUAAUUUUAGUAGUGCUAUCCCCAUGUGAUUUUAAUAGCUUCUUAGGAGAAUGACAAAAAAAAAAAAAAAAAAAAAAAAAAAAAAAAA	AGCUGUAAUUAGUCAGUUUUCU
NC_045512.2	61	66	61	66	1.78	hsa-miR-193a-3p_MIMAT0000459	4	9	4	9	4.7	-3.38	-9.86	-0.396492	AGGCCA&UGGCCU	((((((&))))))	CAAUCUUUAAUCAGUGUGUAACAUUAGGGAGGACUUGAAAGAGCCACCACAUUUUCACCGAGGCCACGCGGAGUACGAUCGAGUGUACAGUGAACAAUGCUAGGGAGAGCUGCCUAUAUGGAAGAGCCCUAAUGUGUAAAAUUAAUUUUAGUAGUGCUAUCCCCAUGUGAUUUUAAUAGCUUCUUAGGAGAAUGACAAAAAAAAAAAAAAAAAAAAAAAAAAAAAAAAA	AACUGGCCUACAAAGUCCCAGU
NC_045512.2	192	197	192	197	0.57	hsa-miR-369-5p_MIMAT0001621	11	16	11	16	0.38	-3.38	-4.33	-0.396492	AUGACA&UGUUAU	((((((&))))))	CAAUCUUUAAUCAGUGUGUAACAUUAGGGAGGACUUGAAAGAGCCACCACAUUUUCACCGAGGCCACGCGGAGUACGAUCGAGUGUACAGUGAACAAUGCUAGGGAGAGCUGCCUAUAUGGAAGAGCCCUAAUGUGUAAAAUUAAUUUUAGUAGUGCUAUCCCCAUGUGAUUUUAAUAGCUUCUUAGGAGAAUGACAAAAAAAAAAAAAAAAAAAAAAAAAAAAAAAAA	AGAUCGACCGUGUUAUAUUCGC
NC_045512.2	106	111	106	111	1.75	hsa-miR-27b-3p_MIMAT0000419	14	19	14	19	0.95	-3.37	-6.07	-0.397488	AGAGCU&AGUUCU	((((((&))))))	CAAUCUUUAAUCAGUGUGUAACAUUAGGGAGGACUUGAAAGAGCCACCACAUUUUCACCGAGGCCACGCGGAGUACGAUCGAGUGUACAGUGAACAAUGCUAGGGAGAGCUGCCUAUAUGGAAGAGCCCUAAUGUGUAAAAUUAAUUUUAGUAGUGCUAUCCCCAUGUGAUUUUAAUAGCUUCUUAGGAGAAUGACAAAAAAAAAAAAAAAAAAAAAAAAAAAAAAAAA	UUCACAGUGGCUAAGUUCUGC
NC_045512.2	180	185	180	185	2.25	hsa-miR-483-5p_MIMAT0004761	13	18	13	18	0.01	-3.37	-5.63	-0.395319	CUUCUU&AAGAAG	((((((&))))))	CAAUCUUUAAUCAGUGUGUAACAUUAGGGAGGACUUGAAAGAGCCACCACAUUUUCACCGAGGCCACGCGGAGUACGAUCGAGUGUACAGUGAACAAUGCUAGGGAGAGCUGCCUAUAUGGAAGAGCCCUAAUGUGUAAAAUUAAUUUUAGUAGUGCUAUCCCCAUGUGAUUUUAAUAGCUUCUUAGGAGAAUGACAAAAAAAAAAAAAAAAAAAAAAAAAAAAAAAAA	AAGACGGGAGGAAAGAAGGGAG
NC_045512.2	133	138	133	138	1.21	hsa-miR-574-3p_MIMAT0003239	9	14	9	14	1.46	-3.37	-6.04	-0.395319	UGUGUA&UGCACA	((((((&))))))	CAAUCUUUAAUCAGUGUGUAACAUUAGGGAGGACUUGAAAGAGCCACCACAUUUUCACCGAGGCCACGCGGAGUACGAUCGAGUGUACAGUGAACAAUGCUAGGGAGAGCUGCCUAUAUGGAAGAGCCCUAAUGUGUAAAAUUAAUUUUAGUAGUGCUAUCCCCAUGUGAUUUUAAUAGCUUCUUAGGAGAAUGACAAAAAAAAAAAAAAAAAAAAAAAAAAAAAAAAA	CACGCUCAUGCACACACCCACA
NC_045512.2	94	99	94	99	1.33	hsa-miR-221-3p_MIMAT0000278	6	11	6	11	0.24	-3.36	-4.93	-0.392101	ACAAUG&CAUUGU	((((((&))))))	CAAUCUUUAAUCAGUGUGUAACAUUAGGGAGGACUUGAAAGAGCCACCACAUUUUCACCGAGGCCACGCGGAGUACGAUCGAGUGUACAGUGAACAAUGCUAGGGAGAGCUGCCUAUAUGGAAGAGCCCUAAUGUGUAAAAUUAAUUUUAGUAGUGCUAUCCCCAUGUGAUUUUAAUAGCUUCUUAGGAGAAUGACAAAAAAAAAAAAAAAAAAAAAAAAAAAAAAAAA	AGCUACAUUGUCUGCUGGGUUUC
NC_045512.2	101	113	101	106	4.17	hsa-miR-523-3p_MIMAT0002840	5	15	10	15	4.44	-3.36	-11.97	-0.392101	UAGGGAGAGCUGC&GCGCUUCCCUA	((((((..((.((&)))).))))))	CAAUCUUUAAUCAGUGUGUAACAUUAGGGAGGACUUGAAAGAGCCACCACAUUUUCACCGAGGCCACGCGGAGUACGAUCGAGUGUACAGUGAACAAUGCUAGGGAGAGCUGCCUAUAUGGAAGAGCCCUAAUGUGUAAAAUUAAUUUUAGUAGUGCUAUCCCCAUGUGAUUUUAAUAGCUUCUUAGGAGAAUGACAAAAAAAAAAAAAAAAAAAAAAAAAAAAAAAAA	GAACGCGCUUCCCUAUAGAGGGU
NC_045512.2	175	180	175	180	1.76	hsa-miR-548aq-5p_MIMAT0022263	11	16	11	16	0.54	-3.36	-5.66	-0.394146	AAUAGC&GCUGUU	((((((&))))))	CAAUCUUUAAUCAGUGUGUAACAUUAGGGAGGACUUGAAAGAGCCACCACAUUUUCACCGAGGCCACGCGGAGUACGAUCGAGUGUACAGUGAACAAUGCUAGGGAGAGCUGCCUAUAUGGAAGAGCCCUAAUGUGUAAAAUUAAUUUUAGUAGUGCUAUCCCCAUGUGAUUUUAAUAGCUUCUUAGGAGAAUGACAAAAAAAAAAAAAAAAAAAAAAAAAAAAAAAAA	GAAAGUAAUUGCUGUUUUUGCC
NC_045512.2	12	23	12	17	1.97	hsa-miR-145-3p_MIMAT0004601	8	18	13	18	0.8	-3.35	-6.12	-0.392973	CAGUGUGUAACA&UGGAAAUACUG	((((((....((&))...))))))	CAAUCUUUAAUCAGUGUGUAACAUUAGGGAGGACUUGAAAGAGCCACCACAUUUUCACCGAGGCCACGCGGAGUACGAUCGAGUGUACAGUGAACAAUGCUAGGGAGAGCUGCCUAUAUGGAAGAGCCCUAAUGUGUAAAAUUAAUUUUAGUAGUGCUAUCCCCAUGUGAUUUUAAUAGCUUCUUAGGAGAAUGACAAAAAAAAAAAAAAAAAAAAAAAAAAAAAAAAA	GGAUUCCUGGAAAUACUGUUCU
NC_045512.2	153	159	154	159	2.39	hsa-miR-338-5p_MIMAT0004701	11	17	11	16	0.25	-3.35	-5.99	-0.392973	AGUGCUA&UGGUGCU	(((((((&)))))))	CAAUCUUUAAUCAGUGUGUAACAUUAGGGAGGACUUGAAAGAGCCACCACAUUUUCACCGAGGCCACGCGGAGUACGAUCGAGUGUACAGUGAACAAUGCUAGGGAGAGCUGCCUAUAUGGAAGAGCCCUAAUGUGUAAAAUUAAUUUUAGUAGUGCUAUCCCCAUGUGAUUUUAAUAGCUUCUUAGGAGAAUGACAAAAAAAAAAAAAAAAAAAAAAAAAAAAAAAAA	AACAAUAUCCUGGUGCUGAGUG
NC_045512.2	189	194	189	194	0.88	hsa-miR-3085-5p_MIMAT0048635	7	12	7	12	0.94	-3.34	-5.16	-0.386011	AGAAUG&CAUUCU	((((((&))))))	CAAUCUUUAAUCAGUGUGUAACAUUAGGGAGGACUUGAAAGAGCCACCACAUUUUCACCGAGGCCACGCGGAGUACGAUCGAGUGUACAGUGAACAAUGCUAGGGAGAGCUGCCUAUAUGGAAGAGCCCUAAUGUGUAAAAUUAAUUUUAGUAGUGCUAUCCCCAUGUGAUUUUAAUAGCUUCUUAGGAGAAUGACAAAAAAAAAAAAAAAAAAAAAAAAAAAAAAAAA	AGGUGCCAUUCUGAGGGCCAGGAGU
NC_045512.2	169	177	172	177	1.79	hsa-miR-576-3p_MIMAT0004796	14	22	14	19	0.22	-3.34	-5.35	-0.3918	GAUUUUAAU&AUUGGAAUC	(((((((((&)))))))))	CAAUCUUUAAUCAGUGUGUAACAUUAGGGAGGACUUGAAAGAGCCACCACAUUUUCACCGAGGCCACGCGGAGUACGAUCGAGUGUACAGUGAACAAUGCUAGGGAGAGCUGCCUAUAUGGAAGAGCCCUAAUGUGUAAAAUUAAUUUUAGUAGUGCUAUCCCCAUGUGAUUUUAAUAGCUUCUUAGGAGAAUGACAAAAAAAAAAAAAAAAAAAAAAAAAAAAAAAAA	AAGAUGUGGAAAAAUUGGAAUC
NC_045512.2	100	106	100	105	3.8	hsa-miR-330-5p_MIMAT0004693	1	7	2	7	0.05	-3.33	-7.18	-0.390627	CUAGGGA&UCUCUGG	(((((((&)))))))	CAAUCUUUAAUCAGUGUGUAACAUUAGGGAGGACUUGAAAGAGCCACCACAUUUUCACCGAGGCCACGCGGAGUACGAUCGAGUGUACAGUGAACAAUGCUAGGGAGAGCUGCCUAUAUGGAAGAGCCCUAAUGUGUAAAAUUAAUUUUAGUAGUGCUAUCCCCAUGUGAUUUUAAUAGCUUCUUAGGAGAAUGACAAAAAAAAAAAAAAAAAAAAAAAAAAAAAAAAA	UCUCUGGGCCUGUGUCUUAGGC
NC_045512.2	168	176	168	173	2.29	hsa-miR-29b-3p_MIMAT0000100	10	18	13	18	0.4	-3.32	-6.01	-0.387433	UGAUUUUAA&UUGAAAUCA	(((((((((&)))))))))	CAAUCUUUAAUCAGUGUGUAACAUUAGGGAGGACUUGAAAGAGCCACCACAUUUUCACCGAGGCCACGCGGAGUACGAUCGAGUGUACAGUGAACAAUGCUAGGGAGAGCUGCCUAUAUGGAAGAGCCCUAAUGUGUAAAAUUAAUUUUAGUAGUGCUAUCCCCAUGUGAUUUUAAUAGCUUCUUAGGAGAAUGACAAAAAAAAAAAAAAAAAAAAAAAAAAAAAAAAA	UAGCACCAUUUGAAAUCAGUGUU
NC_045512.2	49	56	49	54	1.55	hsa-miR-651-3p_MIMAT0026624	5	12	7	12	2.71	-3.32	-7.58	-0.389454	ACAUUUUC&GAAAGUGU	((((((((&))))))))	CAAUCUUUAAUCAGUGUGUAACAUUAGGGAGGACUUGAAAGAGCCACCACAUUUUCACCGAGGCCACGCGGAGUACGAUCGAGUGUACAGUGAACAAUGCUAGGGAGAGCUGCCUAUAUGGAAGAGCCCUAAUGUGUAAAAUUAAUUUUAGUAGUGCUAUCCCCAUGUGAUUUUAAUAGCUUCUUAGGAGAAUGACAAAAAAAAAAAAAAAAAAAAAAAAAAAAAAAAA	AAAGGAAAGUGUAUCCUAAAAG
NC_045512.2	150	155	150	155	1.84	hsa-miR-4677-3p_MIMAT0019761	17	22	17	22	0.01	-3.31	-5.16	-0.388281	AGUAGU&ACUACU	((((((&))))))	CAAUCUUUAAUCAGUGUGUAACAUUAGGGAGGACUUGAAAGAGCCACCACAUUUUCACCGAGGCCACGCGGAGUACGAUCGAGUGUACAGUGAACAAUGCUAGGGAGAGCUGCCUAUAUGGAAGAGCCCUAAUGUGUAAAAUUAAUUUUAGUAGUGCUAUCCCCAUGUGAUUUUAAUAGCUUCUUAGGAGAAUGACAAAAAAAAAAAAAAAAAAAAAAAAAAAAAAAAA	UCUGUGAGACCAAAGAACUACU
NC_045512.2	90	96	90	95	1.32	hsa-miR-452-5p_MIMAT0001635	4	10	5	10	1.81	-3.31	-6.44	-0.388281	GUGAACA&UGUUUGC	(((((((&)))))))	CAAUCUUUAAUCAGUGUGUAACAUUAGGGAGGACUUGAAAGAGCCACCACAUUUUCACCGAGGCCACGCGGAGUACGAUCGAGUGUACAGUGAACAAUGCUAGGGAGAGCUGCCUAUAUGGAAGAGCCCUAAUGUGUAAAAUUAAUUUUAGUAGUGCUAUCCCCAUGUGAUUUUAAUAGCUUCUUAGGAGAAUGACAAAAAAAAAAAAAAAAAAAAAAAAAAAAAAAAA	AACUGUUUGCAGAGGAAACUGA
NC_045512.2	125	131	126	131	2.43	hsa-miR-6791-5p_MIMAT0027482	5	11	5	10	4.54	-3.31	-10.28	-0.388281	AGCCCUA&UGGGGCU	(((((((&)))))))	CAAUCUUUAAUCAGUGUGUAACAUUAGGGAGGACUUGAAAGAGCCACCACAUUUUCACCGAGGCCACGCGGAGUACGAUCGAGUGUACAGUGAACAAUGCUAGGGAGAGCUGCCUAUAUGGAAGAGCCCUAAUGUGUAAAAUUAAUUUUAGUAGUGCUAUCCCCAUGUGAUUUUAAUAGCUUCUUAGGAGAAUGACAAAAAAAAAAAAAAAAAAAAAAAAAAAAAAAAA	CCCCUGGGGCUGGGCAGGCGGA
NC_045512.2	178	183	178	183	1.98	hsa-miR-3157-3p_MIMAT0019210	17	22	17	22	2.02	-3.3	-7.3	-0.387107	AGCUUC&GAAGCU	((((((&))))))	CAAUCUUUAAUCAGUGUGUAACAUUAGGGAGGACUUGAAAGAGCCACCACAUUUUCACCGAGGCCACGCGGAGUACGAUCGAGUGUACAGUGAACAAUGCUAGGGAGAGCUGCCUAUAUGGAAGAGCCCUAAUGUGUAAAAUUAAUUUUAGUAGUGCUAUCCCCAUGUGAUUUUAAUAGCUUCUUAGGAGAAUGACAAAAAAAAAAAAAAAAAAAAAAAAAAAAAAAAA	CUGCCCUAGUCUAGCUGAAGCU
NC_045512.2	147	158	153	158	2.51	hsa-miR-101-3p_MIMAT0000099	4	21	4	9	1.91	-3.29	-7.71	-0.388052	UUUAGUAGUGCU&AGUACUGUGAUAACUGAA	((((((((((((&))))))......))))))	CAAUCUUUAAUCAGUGUGUAACAUUAGGGAGGACUUGAAAGAGCCACCACAUUUUCACCGAGGCCACGCGGAGUACGAUCGAGUGUACAGUGAACAAUGCUAGGGAGAGCUGCCUAUAUGGAAGAGCCCUAAUGUGUAAAAUUAAUUUUAGUAGUGCUAUCCCCAUGUGAUUUUAAUAGCUUCUUAGGAGAAUGACAAAAAAAAAAAAAAAAAAAAAAAAAAAAAAAAA	UACAGUACUGUGAUAACUGAA
NC_045512.2	154	159	154	159	2.36	hsa-miR-577_MIMAT0003242	13	18	13	18	0.06	-3.29	-5.71	-0.388052	GUGCUA&UGGUAC	((((((&))))))	CAAUCUUUAAUCAGUGUGUAACAUUAGGGAGGACUUGAAAGAGCCACCACAUUUUCACCGAGGCCACGCGGAGUACGAUCGAGUGUACAGUGAACAAUGCUAGGGAGAGCUGCCUAUAUGGAAGAGCCCUAAUGUGUAAAAUUAAUUUUAGUAGUGCUAUCCCCAUGUGAUUUUAAUAGCUUCUUAGGAGAAUGACAAAAAAAAAAAAAAAAAAAAAAAAAAAAAAAAA	UAGAUAAAAUAUUGGUACCUG
NC_045512.2	4	9	4	9	0.57	hsa-miR-1-3p_MIMAT0000416	8	13	8	13	0.2	-3.28	-4.05	-0.384761	UCUUUA&UAAAGA	((((((&))))))	CAAUCUUUAAUCAGUGUGUAACAUUAGGGAGGACUUGAAAGAGCCACCACAUUUUCACCGAGGCCACGCGGAGUACGAUCGAGUGUACAGUGAACAAUGCUAGGGAGAGCUGCCUAUAUGGAAGAGCCCUAAUGUGUAAAAUUAAUUUUAGUAGUGCUAUCCCCAUGUGAUUUUAAUAGCUUCUUAGGAGAAUGACAAAAAAAAAAAAAAAAAAAAAAAAAAAAAAAAA	UGGAAUGUAAAGAAGUAUGUAU
NC_045512.2	182	187	182	187	2.93	hsa-miR-548e-3p_MIMAT0005874	6	11	6	11	0.23	-3.28	-6.44	-0.384761	UCUUAG&CUGAGA	((((((&))))))	CAAUCUUUAAUCAGUGUGUAACAUUAGGGAGGACUUGAAAGAGCCACCACAUUUUCACCGAGGCCACGCGGAGUACGAUCGAGUGUACAGUGAACAAUGCUAGGGAGAGCUGCCUAUAUGGAAGAGCCCUAAUGUGUAAAAUUAAUUUUAGUAGUGCUAUCCCCAUGUGAUUUUAAUAGCUUCUUAGGAGAAUGACAAAAAAAAAAAAAAAAAAAAAAAAAAAAAAAAA	AAAAACUGAGACUACUUUUGCA
NC_045512.2	4	15	10	15	2.37	hsa-miR-134-5p_MIMAT0000447	5	18	5	10	4.29	-3.24	-9.9	-0.380069	UCUUUAAUCAGU&ACUGGUUGACCAGA	((((((((((((&)))))))))..)))	CAAUCUUUAAUCAGUGUGUAACAUUAGGGAGGACUUGAAAGAGCCACCACAUUUUCACCGAGGCCACGCGGAGUACGAUCGAGUGUACAGUGAACAAUGCUAGGGAGAGCUGCCUAUAUGGAAGAGCCCUAAUGUGUAAAAUUAAUUUUAGUAGUGCUAUCCCCAUGUGAUUUUAAUAGCUUCUUAGGAGAAUGACAAAAAAAAAAAAAAAAAAAAAAAAAAAAAAAAA	UGUGACUGGUUGACCAGAGGGG
NC_045512.2	127	135	127	132	2.45	hsa-miR-365a-5p_MIMAT0009199	5	14	9	14	2.72	-3.22	-8.39	-0.375764	CCCUAAUGU&ACUUUUGGGG	((((((.((&))..))))))	CAAUCUUUAAUCAGUGUGUAACAUUAGGGAGGACUUGAAAGAGCCACCACAUUUUCACCGAGGCCACGCGGAGUACGAUCGAGUGUACAGUGAACAAUGCUAGGGAGAGCUGCCUAUAUGGAAGAGCCCUAAUGUGUAAAAUUAAUUUUAGUAGUGCUAUCCCCAUGUGAUUUUAAUAGCUUCUUAGGAGAAUGACAAAAAAAAAAAAAAAAAAAAAAAAAAAAAAAAA	AGGGACUUUUGGGGGCAGAUGUG
NC_045512.2	60	65	60	65	2.45	hsa-miR-103a-1-5p_MIMAT0037306	1	6	1	6	4.21	-3.21	-9.87	-0.374597	GAGGCC&GGCUUC	((((((&))))))	CAAUCUUUAAUCAGUGUGUAACAUUAGGGAGGACUUGAAAGAGCCACCACAUUUUCACCGAGGCCACGCGGAGUACGAUCGAGUGUACAGUGAACAAUGCUAGGGAGAGCUGCCUAUAUGGAAGAGCCCUAAUGUGUAAAAUUAAUUUUAGUAGUGCUAUCCCCAUGUGAUUUUAAUAGCUUCUUAGGAGAAUGACAAAAAAAAAAAAAAAAAAAAAAAAAAAAAAAAA	GGCUUCUUUACAGUGCUGCCUUG
NC_045512.2	190	195	190	195	0.54	hsa-miR-205-5p_MIMAT0000266	5	10	5	10	1.72	-3.21	-5.47	-0.37655	GAAUGA&UCAUUC	((((((&))))))	CAAUCUUUAAUCAGUGUGUAACAUUAGGGAGGACUUGAAAGAGCCACCACAUUUUCACCGAGGCCACGCGGAGUACGAUCGAGUGUACAGUGAACAAUGCUAGGGAGAGCUGCCUAUAUGGAAGAGCCCUAAUGUGUAAAAUUAAUUUUAGUAGUGCUAUCCCCAUGUGAUUUUAAUAGCUUCUUAGGAGAAUGACAAAAAAAAAAAAAAAAAAAAAAAAAAAAAAAAA	UCCUUCAUUCCACCGGAGUCUG
NC_045512.2	191	197	191	196	0.57	hsa-miR-196a-5p_MIMAT0000226	13	19	14	19	0.57	-3.2	-4.34	-0.375377	AAUGACA&UGUUGUU	(((((((&)))))))	CAAUCUUUAAUCAGUGUGUAACAUUAGGGAGGACUUGAAAGAGCCACCACAUUUUCACCGAGGCCACGCGGAGUACGAUCGAGUGUACAGUGAACAAUGCUAGGGAGAGCUGCCUAUAUGGAAGAGCCCUAAUGUGUAAAAUUAAUUUUAGUAGUGCUAUCCCCAUGUGAUUUUAAUAGCUUCUUAGGAGAAUGACAAAAAAAAAAAAAAAAAAAAAAAAAAAAAAAAA	UAGGUAGUUUCAUGUUGUUGGG
NC_045512.2	26	34	27	32	3.97	hsa-miR-2114-5p_MIMAT0011156	3	12	6	11	4.02	-3.2	-11.19	-0.375377	AGGGAGGAC&GUCCCUUCCU	(((((((((&)).)))))))	CAAUCUUUAAUCAGUGUGUAACAUUAGGGAGGACUUGAAAGAGCCACCACAUUUUCACCGAGGCCACGCGGAGUACGAUCGAGUGUACAGUGAACAAUGCUAGGGAGAGCUGCCUAUAUGGAAGAGCCCUAAUGUGUAAAAUUAAUUUUAGUAGUGCUAUCCCCAUGUGAUUUUAAUAGCUUCUUAGGAGAAUGACAAAAAAAAAAAAAAAAAAAAAAAAAAAAAAAAA	UAGUCCCUUCCUUGAAGCGGUC
NC_045512.2	102	109	102	107	4	hsa-miR-449c-3p_MIMAT0013771	13	21	16	21	0.04	-3.2	-7.24	-0.37343	AGGGAGAG&CUCCUCUCU	((((((((&)).))))))	CAAUCUUUAAUCAGUGUGUAACAUUAGGGAGGACUUGAAAGAGCCACCACAUUUUCACCGAGGCCACGCGGAGUACGAUCGAGUGUACAGUGAACAAUGCUAGGGAGAGCUGCCUAUAUGGAAGAGCCCUAAUGUGUAAAAUUAAUUUUAGUAGUGCUAUCCCCAUGUGAUUUUAAUAGCUUCUUAGGAGAAUGACAAAAAAAAAAAAAAAAAAAAAAAAAAAAAAAAA	UUGCUAGUUGCACUCCUCUCUGU
NC_045512.2	174	180	175	180	1.82	hsa-miR-194-3p_MIMAT0004671	12	18	12	17	2.22	-3.18	-7.22	-0.373031	UAAUAGC&GCUGUUA	(((((((&)))))))	CAAUCUUUAAUCAGUGUGUAACAUUAGGGAGGACUUGAAAGAGCCACCACAUUUUCACCGAGGCCACGCGGAGUACGAUCGAGUGUACAGUGAACAAUGCUAGGGAGAGCUGCCUAUAUGGAAGAGCCCUAAUGUGUAAAAUUAAUUUUAGUAGUGCUAUCCCCAUGUGAUUUUAAUAGCUUCUUAGGAGAAUGACAAAAAAAAAAAAAAAAAAAAAAAAAAAAAAAAA	CCAGUGGGGCUGCUGUUAUCUG
NC_045512.2	135	141	135	140	0.99	hsa-miR-450b-5p_MIMAT0004909	1	7	2	7	0.13	-3.18	-4.3	-0.373031	UGUAAAA&UUUUGCA	(((((((&)))))))	CAAUCUUUAAUCAGUGUGUAACAUUAGGGAGGACUUGAAAGAGCCACCACAUUUUCACCGAGGCCACGCGGAGUACGAUCGAGUGUACAGUGAACAAUGCUAGGGAGAGCUGCCUAUAUGGAAGAGCCCUAAUGUGUAAAAUUAAUUUUAGUAGUGCUAUCCCCAUGUGAUUUUAAUAGCUUCUUAGGAGAAUGACAAAAAAAAAAAAAAAAAAAAAAAAAAAAAAAAA	UUUUGCAAUAUGUUCCUGAAUA
NC_045512.2	164	172	164	169	2.33	hsa-miR-96-3p_MIMAT0004510	1	9	4	9	1.39	-3.18	-6.9	-0.373031	CAUGUGAUU&AAUCAUGUG	(((((((((&)))))))))	CAAUCUUUAAUCAGUGUGUAACAUUAGGGAGGACUUGAAAGAGCCACCACAUUUUCACCGAGGCCACGCGGAGUACGAUCGAGUGUACAGUGAACAAUGCUAGGGAGAGCUGCCUAUAUGGAAGAGCCCUAAUGUGUAAAAUUAAUUUUAGUAGUGCUAUCCCCAUGUGAUUUUAAUAGCUUCUUAGGAGAAUGACAAAAAAAAAAAAAAAAAAAAAAAAAAAAAAAAA	AAUCAUGUGCAGUGCCAAUAUG
NC_045512.2	111	129	111	116	6.05	hsa-miR-664b-5p_MIMAT0022271	2	24	19	24	1.28	-3.17	-10.5	-0.368101	UGCCUAUAUGGAAGAGCCC&GGGCUAAGGGAGAUGAUUGGGUA	((((((.........((((&)))).............))))))	CAAUCUUUAAUCAGUGUGUAACAUUAGGGAGGACUUGAAAGAGCCACCACAUUUUCACCGAGGCCACGCGGAGUACGAUCGAGUGUACAGUGAACAAUGCUAGGGAGAGCUGCCUAUAUGGAAGAGCCCUAAUGUGUAAAAUUAAUUUUAGUAGUGCUAUCCCCAUGUGAUUUUAAUAGCUUCUUAGGAGAAUGACAAAAAAAAAAAAAAAAAAAAAAAAAAAAAAAAA	UGGGCUAAGGGAGAUGAUUGGGUA
NC_045512.2	176	181	176	181	1.84	hsa-miR-9-5p_MIMAT0000441	14	19	14	19	1.14	-3.17	-6.15	-0.369929	AUAGCU&AGCUGU	((((((&))))))	CAAUCUUUAAUCAGUGUGUAACAUUAGGGAGGACUUGAAAGAGCCACCACAUUUUCACCGAGGCCACGCGGAGUACGAUCGAGUGUACAGUGAACAAUGCUAGGGAGAGCUGCCUAUAUGGAAGAGCCCUAAUGUGUAAAAUUAAUUUUAGUAGUGCUAUCCCCAUGUGAUUUUAAUAGCUUCUUAGGAGAAUGACAAAAAAAAAAAAAAAAAAAAAAAAAAAAAAAAA	UCUUUGGUUAUCUAGCUGUAUGA
NC_045512.2	184	189	184	189	3.13	hsa-miR-450b-5p_MIMAT0004909	14	19	14	19	0.05	-3.15	-6.33	-0.369512	UUAGGA&UCCUGA	((((((&))))))	CAAUCUUUAAUCAGUGUGUAACAUUAGGGAGGACUUGAAAGAGCCACCACAUUUUCACCGAGGCCACGCGGAGUACGAUCGAGUGUACAGUGAACAAUGCUAGGGAGAGCUGCCUAUAUGGAAGAGCCCUAAUGUGUAAAAUUAAUUUUAGUAGUGCUAUCCCCAUGUGAUUUUAAUAGCUUCUUAGGAGAAUGACAAAAAAAAAAAAAAAAAAAAAAAAAAAAAAAAA	UUUUGCAAUAUGUUCCUGAAUA
NC_045512.2	12	17	12	17	1.7	hsa-miR-200c-3p_MIMAT0000617	3	8	3	8	0.47	-3.13	-5.3	-0.365261	CAGUGU&AUACUG	((((((&))))))	CAAUCUUUAAUCAGUGUGUAACAUUAGGGAGGACUUGAAAGAGCCACCACAUUUUCACCGAGGCCACGCGGAGUACGAUCGAGUGUACAGUGAACAAUGCUAGGGAGAGCUGCCUAUAUGGAAGAGCCCUAAUGUGUAAAAUUAAUUUUAGUAGUGCUAUCCCCAUGUGAUUUUAAUAGCUUCUUAGGAGAAUGACAAAAAAAAAAAAAAAAAAAAAAAAAAAAAAAAA	UAAUACUGCCGGGUAAUGAUGGA
NC_045512.2	163	171	166	171	2.79	hsa-miR-323a-3p_MIMAT0000755	4	12	4	9	0.6	-3.13	-6.52	-0.36918	CCAUGUGAU&AUUACACGG	((.((((((&)))))).))	CAAUCUUUAAUCAGUGUGUAACAUUAGGGAGGACUUGAAAGAGCCACCACAUUUUCACCGAGGCCACGCGGAGUACGAUCGAGUGUACAGUGAACAAUGCUAGGGAGAGCUGCCUAUAUGGAAGAGCCCUAAUGUGUAAAAUUAAUUUUAGUAGUGCUAUCCCCAUGUGAUUUUAAUAGCUUCUUAGGAGAAUGACAAAAAAAAAAAAAAAAAAAAAAAAAAAAAAAAA	CACAUUACACGGUCGACCUCU
NC_045512.2	157	162	157	162	2.61	hsa-miR-937-5p_MIMAT0022938	9	14	9	14	0.29	-3.13	-6.03	-0.371317	CUAUCC&GGGUGG	((((((&))))))	CAAUCUUUAAUCAGUGUGUAACAUUAGGGAGGACUUGAAAGAGCCACCACAUUUUCACCGAGGCCACGCGGAGUACGAUCGAGUGUACAGUGAACAAUGCUAGGGAGAGCUGCCUAUAUGGAAGAGCCCUAAUGUGUAAAAUUAAUUUUAGUAGUGCUAUCCCCAUGUGAUUUUAAUAGCUUCUUAGGAGAAUGACAAAAAAAAAAAAAAAAAAAAAAAAAAAAAAAAA	GUGAGUCAGGGUGGGGCUGG
NC_045512.2	48	53	48	53	1.73	hsa-miR-122-5p_MIMAT0000421	4	9	4	9	0.44	-3.12	-5.29	-0.365993	CACAUU&AGUGUG	((((((&))))))	CAAUCUUUAAUCAGUGUGUAACAUUAGGGAGGACUUGAAAGAGCCACCACAUUUUCACCGAGGCCACGCGGAGUACGAUCGAGUGUACAGUGAACAAUGCUAGGGAGAGCUGCCUAUAUGGAAGAGCCCUAAUGUGUAAAAUUAAUUUUAGUAGUGCUAUCCCCAUGUGAUUUUAAUAGCUUCUUAGGAGAAUGACAAAAAAAAAAAAAAAAAAAAAAAAAAAAAAAAA	UGGAGUGUGACAAUGGUGUUUG
NC_045512.2	135	142	135	140	1	hsa-miR-450a-1-3p_MIMAT0022700	10	17	12	17	1.09	-3.12	-5.21	-0.365993	UGUAAAAU&AUUUUGCA	((((((((&))))))))	CAAUCUUUAAUCAGUGUGUAACAUUAGGGAGGACUUGAAAGAGCCACCACAUUUUCACCGAGGCCACGCGGAGUACGAUCGAGUGUACAGUGAACAAUGCUAGGGAGAGCUGCCUAUAUGGAAGAGCCCUAAUGUGUAAAAUUAAUUUUAGUAGUGCUAUCCCCAUGUGAUUUUAAUAGCUUCUUAGGAGAAUGACAAAAAAAAAAAAAAAAAAAAAAAAAAAAAAAAA	AUUGGGAACAUUUUGCAUGUAU
NC_045512.2	184	199	184	189	4.09	hsa-miR-450a-5p_MIMAT0001545	2	19	14	19	0.49	-3.12	-7.7	-0.365993	UUAGGAGAAUGACAAA&UUUGCGAUGUGUUCCUAA	((((((..((..((((&))))..))....))))))	CAAUCUUUAAUCAGUGUGUAACAUUAGGGAGGACUUGAAAGAGCCACCACAUUUUCACCGAGGCCACGCGGAGUACGAUCGAGUGUACAGUGAACAAUGCUAGGGAGAGCUGCCUAUAUGGAAGAGCCCUAAUGUGUAAAAUUAAUUUUAGUAGUGCUAUCCCCAUGUGAUUUUAAUAGCUUCUUAGGAGAAUGACAAAAAAAAAAAAAAAAAAAAAAAAAAAAAAAAA	UUUUGCGAUGUGUUCCUAAUAU
NC_045512.2	104	112	107	112	4.07	hsa-miR-589-3p_MIMAT0003256	14	21	14	19	2.49	-3.12	-9.68	-0.362295	GGAGAGCUG&CGGUUCCC	((.((((((&))))))))	CAAUCUUUAAUCAGUGUGUAACAUUAGGGAGGACUUGAAAGAGCCACCACAUUUUCACCGAGGCCACGCGGAGUACGAUCGAGUGUACAGUGAACAAUGCUAGGGAGAGCUGCCUAUAUGGAAGAGCCCUAAUGUGUAAAAUUAAUUUUAGUAGUGCUAUCCCCAUGUGAUUUUAAUAGCUUCUUAGGAGAAUGACAAAAAAAAAAAAAAAAAAAAAAAAAAAAAAAAA	UCAGAACAAAUGCCGGUUCCCAGA
NC_045512.2	154	159	154	159	2.36	hsa-miR-126-5p_MIMAT0000444	13	18	13	18	0.64	-3.11	-6.11	-0.366821	GUGCUA&UGGUAC	((((((&))))))	CAAUCUUUAAUCAGUGUGUAACAUUAGGGAGGACUUGAAAGAGCCACCACAUUUUCACCGAGGCCACGCGGAGUACGAUCGAGUGUACAGUGAACAAUGCUAGGGAGAGCUGCCUAUAUGGAAGAGCCCUAAUGUGUAAAAUUAAUUUUAGUAGUGCUAUCCCCAUGUGAUUUUAAUAGCUUCUUAGGAGAAUGACAAAAAAAAAAAAAAAAAAAAAAAAAAAAAAAAA	CAUUAUUACUUUUGGUACGCG
NC_045512.2	176	185	180	185	2.64	hsa-miR-1-3p_MIMAT0000416	10	18	10	15	0.22	-3.11	-5.97	-0.364819	AUAGCUUCUU&AAGAAGUAU	(((.((((((&)))))))))	CAAUCUUUAAUCAGUGUGUAACAUUAGGGAGGACUUGAAAGAGCCACCACAUUUUCACCGAGGCCACGCGGAGUACGAUCGAGUGUACAGUGAACAAUGCUAGGGAGAGCUGCCUAUAUGGAAGAGCCCUAAUGUGUAAAAUUAAUUUUAGUAGUGCUAUCCCCAUGUGAUUUUAAUAGCUUCUUAGGAGAAUGACAAAAAAAAAAAAAAAAAAAAAAAAAAAAAAAAA	UGGAAUGUAAAGAAGUAUGUAU
NC_045512.2	118	124	119	124	3.07	hsa-miR-2115-5p_MIMAT0011158	3	9	3	8	2.93	-3.11	-9.11	-0.364819	AUGGAAG&CUUCCAU	(((((((&)))))))	CAAUCUUUAAUCAGUGUGUAACAUUAGGGAGGACUUGAAAGAGCCACCACAUUUUCACCGAGGCCACGCGGAGUACGAUCGAGUGUACAGUGAACAAUGCUAGGGAGAGCUGCCUAUAUGGAAGAGCCCUAAUGUGUAAAAUUAAUUUUAGUAGUGCUAUCCCCAUGUGAUUUUAAUAGCUUCUUAGGAGAAUGACAAAAAAAAAAAAAAAAAAAAAAAAAAAAAAAAA	AGCUUCCAUGACUCCUGAUGGA
NC_045512.2	157	165	157	162	2.9	hsa-miR-509-3p_MIMAT0002881	14	22	17	22	0.86	-3.1	-6.86	-0.363646	CUAUCCCCA&UGUGGGUAG	((((((.((&)).))))))	CAAUCUUUAAUCAGUGUGUAACAUUAGGGAGGACUUGAAAGAGCCACCACAUUUUCACCGAGGCCACGCGGAGUACGAUCGAGUGUACAGUGAACAAUGCUAGGGAGAGCUGCCUAUAUGGAAGAGCCCUAAUGUGUAAAAUUAAUUUUAGUAGUGCUAUCCCCAUGUGAUUUUAAUAGCUUCUUAGGAGAAUGACAAAAAAAAAAAAAAAAAAAAAAAAAAAAAAAAA	UGAUUGGUACGUCUGUGGGUAG
NC_045512.2	181	187	181	186	2.97	hsa-miR-664a-5p_MIMAT0005948	6	12	7	12	0.47	-3.09	-6.53	-0.358811	UUCUUAG&CUAGGGA	(((((((&)))))))	CAAUCUUUAAUCAGUGUGUAACAUUAGGGAGGACUUGAAAGAGCCACCACAUUUUCACCGAGGCCACGCGGAGUACGAUCGAGUGUACAGUGAACAAUGCUAGGGAGAGCUGCCUAUAUGGAAGAGCCCUAAUGUGUAAAAUUAAUUUUAGUAGUGCUAUCCCCAUGUGAUUUUAAUAGCUUCUUAGGAGAAUGACAAAAAAAAAAAAAAAAAAAAAAAAAAAAAAAAA	ACUGGCUAGGGAAAAUGAUUGGAU
NC_045512.2	3	8	3	8	0.58	hsa-miR-892c-5p_MIMAT0025857	8	13	8	13	0.17	-3.09	-3.84	-0.364462	AUCUUU&AAAGGU	((((((&))))))	CAAUCUUUAAUCAGUGUGUAACAUUAGGGAGGACUUGAAAGAGCCACCACAUUUUCACCGAGGCCACGCGGAGUACGAUCGAGUGUACAGUGAACAAUGCUAGGGAGAGCUGCCUAUAUGGAAGAGCCCUAAUGUGUAAAAUUAAUUUUAGUAGUGCUAUCCCCAUGUGAUUUUAAUAGCUUCUUAGGAGAAUGACAAAAAAAAAAAAAAAAAAAAAAAAAAAAAAAAA	UAUUCAGAAAGGUGCCAGUCA
NC_045512.2	23	28	23	28	2.91	hsa-miR-374a-5p_MIMAT0000727	12	17	12	17	0.19	-3.07	-6.17	-0.360127	AUUAGG&CCUGAU	((((((&))))))	CAAUCUUUAAUCAGUGUGUAACAUUAGGGAGGACUUGAAAGAGCCACCACAUUUUCACCGAGGCCACGCGGAGUACGAUCGAGUGUACAGUGAACAAUGCUAGGGAGAGCUGCCUAUAUGGAAGAGCCCUAAUGUGUAAAAUUAAUUUUAGUAGUGCUAUCCCCAUGUGAUUUUAAUAGCUUCUUAGGAGAAUGACAAAAAAAAAAAAAAAAAAAAAAAAAAAAAAAAA	UUAUAAUACAACCUGAUAAGUG
NC_045512.2	96	102	97	102	2.13	hsa-miR-122b-5p_MIMAT0019876	14	20	14	19	0.52	-3.06	-5.71	-0.357092	AAUGCUA&UGGCGUU	(((((((&)))))))	CAAUCUUUAAUCAGUGUGUAACAUUAGGGAGGACUUGAAAGAGCCACCACAUUUUCACCGAGGCCACGCGGAGUACGAUCGAGUGUACAGUGAACAAUGCUAGGGAGAGCUGCCUAUAUGGAAGAGCCCUAAUGUGUAAAAUUAAUUUUAGUAGUGCUAUCCCCAUGUGAUUUUAAUAGCUUCUUAGGAGAAUGACAAAAAAAAAAAAAAAAAAAAAAAAAAAAAAAAA	UUUAGUGUGAUAAUGGCGUUUGA
NC_045512.2	68	74	68	73	3.22	hsa-miR-3688-3p_MIMAT0018116	10	16	11	16	1.34	-3.06	-7.62	-0.358954	GCGGAGU&ACUUUGC	(((((((&)))))))	CAAUCUUUAAUCAGUGUGUAACAUUAGGGAGGACUUGAAAGAGCCACCACAUUUUCACCGAGGCCACGCGGAGUACGAUCGAGUGUACAGUGAACAAUGCUAGGGAGAGCUGCCUAUAUGGAAGAGCCCUAAUGUGUAAAAUUAAUUUUAGUAGUGCUAUCCCCAUGUGAUUUUAAUAGCUUCUUAGGAGAAUGACAAAAAAAAAAAAAAAAAAAAAAAAAAAAAAAAA	UAUGGAAAGACUUUGCCACUCU
NC_045512.2	190	195	190	195	0.54	hsa-miR-1298-5p_MIMAT0005800	2	7	2	7	1.86	-3.05	-5.45	-0.357781	GAAUGA&UCAUUC	((((((&))))))	CAAUCUUUAAUCAGUGUGUAACAUUAGGGAGGACUUGAAAGAGCCACCACAUUUUCACCGAGGCCACGCGGAGUACGAUCGAGUGUACAGUGAACAAUGCUAGGGAGAGCUGCCUAUAUGGAAGAGCCCUAAUGUGUAAAAUUAAUUUUAGUAGUGCUAUCCCCAUGUGAUUUUAAUAGCUUCUUAGGAGAAUGACAAAAAAAAAAAAAAAAAAAAAAAAAAAAAAAAA	UUCAUUCGGCUGUCCAGAUGUA
NC_045512.2	128	133	128	133	2.17	hsa-miR-6509-5p_MIMAT0025474	1	6	1	6	0.15	-3.02	-5.34	-0.356206	CCUAAU&AUUAGG	((((((&))))))	CAAUCUUUAAUCAGUGUGUAACAUUAGGGAGGACUUGAAAGAGCCACCACAUUUUCACCGAGGCCACGCGGAGUACGAUCGAGUGUACAGUGAACAAUGCUAGGGAGAGCUGCCUAUAUGGAAGAGCCCUAAUGUGUAAAAUUAAUUUUAGUAGUGCUAUCCCCAUGUGAUUUUAAUAGCUUCUUAGGAGAAUGACAAAAAAAAAAAAAAAAAAAAAAAAAAAAAAAAA	AUUAGGUAGUGGCAGUGGAAC
NC_045512.2	110	115	110	115	2.5	hsa-let-7i-5p_MIMAT0000415	3	8	3	8	1.37	-3	-6.87	-0.351916	CUGCCU&AGGUAG	((((((&))))))	CAAUCUUUAAUCAGUGUGUAACAUUAGGGAGGACUUGAAAGAGCCACCACAUUUUCACCGAGGCCACGCGGAGUACGAUCGAGUGUACAGUGAACAAUGCUAGGGAGAGCUGCCUAUAUGGAAGAGCCCUAAUGUGUAAAAUUAAUUUUAGUAGUGCUAUCCCCAUGUGAUUUUAAUAGCUUCUUAGGAGAAUGACAAAAAAAAAAAAAAAAAAAAAAAAAAAAAAAAA	UGAGGUAGUAGUUUGUGCUGUU
NC_045512.2	107	112	107	112	1.75	hsa-miR-24-3p_MIMAT0000080	6	11	6	11	1.11	-2.99	-5.85	-0.350743	GAGCUG&CAGUUC	((((((&))))))	CAAUCUUUAAUCAGUGUGUAACAUUAGGGAGGACUUGAAAGAGCCACCACAUUUUCACCGAGGCCACGCGGAGUACGAUCGAGUGUACAGUGAACAAUGCUAGGGAGAGCUGCCUAUAUGGAAGAGCCCUAAUGUGUAAAAUUAAUUUUAGUAGUGCUAUCCCCAUGUGAUUUUAAUAGCUUCUUAGGAGAAUGACAAAAAAAAAAAAAAAAAAAAAAAAAAAAAAAAA	UGGCUCAGUUCAGCAGGAACAG
NC_045512.2	178	196	185	190	5.11	hsa-let-7c-3p_MIMAT0026472	3	18	10	15	0.05	-2.98	-8.14	-0.34957	AGCUUCUUAGGAGAAUGAC&GUACAACCUUCUAGCU	(((....((((((..((((&)).))..)))))))))	CAAUCUUUAAUCAGUGUGUAACAUUAGGGAGGACUUGAAAGAGCCACCACAUUUUCACCGAGGCCACGCGGAGUACGAUCGAGUGUACAGUGAACAAUGCUAGGGAGAGCUGCCUAUAUGGAAGAGCCCUAAUGUGUAAAAUUAAUUUUAGUAGUGCUAUCCCCAUGUGAUUUUAAUAGCUUCUUAGGAGAAUGACAAAAAAAAAAAAAAAAAAAAAAAAAAAAAAAAA	CUGUACAACCUUCUAGCUUUCC
NC_045512.2	186	191	186	191	2.54	hsa-miR-7111-3p_MIMAT0028120	5	10	5	10	0	-2.98	-5.52	-0.34957	AGGAGA&UCUCUU	((((((&))))))	CAAUCUUUAAUCAGUGUGUAACAUUAGGGAGGACUUGAAAGAGCCACCACAUUUUCACCGAGGCCACGCGGAGUACGAUCGAGUGUACAGUGAACAAUGCUAGGGAGAGCUGCCUAUAUGGAAGAGCCCUAAUGUGUAAAAUUAAUUUUAGUAGUGCUAUCCCCAUGUGAUUUUAAUAGCUUCUUAGGAGAAUGACAAAAAAAAAAAAAAAAAAAAAAAAAAAAAAAAA	AUCCUCUCUUCCCUCCUCCCAG
NC_045512.2	189	197	192	197	1.04	hsa-miR-194-3p_MIMAT0004671	14	21	14	19	1.37	-2.97	-5.38	-0.348397	AGAAUGACA&UGUUAUCU	((.((((((&))))))))	CAAUCUUUAAUCAGUGUGUAACAUUAGGGAGGACUUGAAAGAGCCACCACAUUUUCACCGAGGCCACGCGGAGUACGAUCGAGUGUACAGUGAACAAUGCUAGGGAGAGCUGCCUAUAUGGAAGAGCCCUAAUGUGUAAAAUUAAUUUUAGUAGUGCUAUCCCCAUGUGAUUUUAAUAGCUUCUUAGGAGAAUGACAAAAAAAAAAAAAAAAAAAAAAAAAAAAAAAAA	CCAGUGGGGCUGCUGUUAUCUG
NC_045512.2	110	115	110	115	2.5	hsa-miR-3140-3p_MIMAT0015008	16	21	16	21	2.05	-2.96	-7.51	-0.347224	CUGCCU&AGGUAG	((((((&))))))	CAAUCUUUAAUCAGUGUGUAACAUUAGGGAGGACUUGAAAGAGCCACCACAUUUUCACCGAGGCCACGCGGAGUACGAUCGAGUGUACAGUGAACAAUGCUAGGGAGAGCUGCCUAUAUGGAAGAGCCCUAAUGUGUAAAAUUAAUUUUAGUAGUGCUAUCCCCAUGUGAUUUUAAUAGCUUCUUAGGAGAAUGACAAAAAAAAAAAAAAAAAAAAAAAAAAAAAAAAA	AGCUUUUGGGAAUUCAGGUAGU
NC_045512.2	5	20	5	10	2.45	hsa-miR-519c-3p_MIMAT0002832	5	19	14	19	2.02	-2.96	-7.43	-0.347224	CUUUAAUCAGUGUGUA&UGCAUCUUUUUAGAG	((((((..((..((((&)))).))..))))))	CAAUCUUUAAUCAGUGUGUAACAUUAGGGAGGACUUGAAAGAGCCACCACAUUUUCACCGAGGCCACGCGGAGUACGAUCGAGUGUACAGUGAACAAUGCUAGGGAGAGCUGCCUAUAUGGAAGAGCCCUAAUGUGUAAAAUUAAUUUUAGUAGUGCUAUCCCCAUGUGAUUUUAAUAGCUUCUUAGGAGAAUGACAAAAAAAAAAAAAAAAAAAAAAAAAAAAAAAAA	AAAGUGCAUCUUUUUAGAGGAU
NC_045512.2	120	128	123	128	3.22	hsa-miR-548d-5p_MIMAT0004812	13	22	13	18	1.38	-2.96	-7.56	-0.347224	GGAAGAGCC&GGUUUUUGCC	(((((((((&))))))).))	CAAUCUUUAAUCAGUGUGUAACAUUAGGGAGGACUUGAAAGAGCCACCACAUUUUCACCGAGGCCACGCGGAGUACGAUCGAGUGUACAGUGAACAAUGCUAGGGAGAGCUGCCUAUAUGGAAGAGCCCUAAUGUGUAAAAUUAAUUUUAGUAGUGCUAUCCCCAUGUGAUUUUAAUAGCUUCUUAGGAGAAUGACAAAAAAAAAAAAAAAAAAAAAAAAAAAAAAAAA	AAAAGUAAUUGUGGUUUUUGCC
NC_045512.2	82	91	83	88	3.05	hsa-miR-643_MIMAT0003313	1	11	5	10	2.43	-2.96	-8.44	-0.347224	AGUGUACAGU&ACUUGUAUGCU	((((((((((&)).))))))))	CAAUCUUUAAUCAGUGUGUAACAUUAGGGAGGACUUGAAAGAGCCACCACAUUUUCACCGAGGCCACGCGGAGUACGAUCGAGUGUACAGUGAACAAUGCUAGGGAGAGCUGCCUAUAUGGAAGAGCCCUAAUGUGUAAAAUUAAUUUUAGUAGUGCUAUCCCCAUGUGAUUUUAAUAGCUUCUUAGGAGAAUGACAAAAAAAAAAAAAAAAAAAAAAAAAAAAAAAAA	ACUUGUAUGCUAGCUCAGGUAG
NC_045512.2	178	184	179	184	2.1	hsa-miR-2467-3p_MIMAT0019953	12	18	12	17	3.4	-2.95	-8.45	-0.346051	AGCUUCU&AGAGGCU	(((((((&)))))))	CAAUCUUUAAUCAGUGUGUAACAUUAGGGAGGACUUGAAAGAGCCACCACAUUUUCACCGAGGCCACGCGGAGUACGAUCGAGUGUACAGUGAACAAUGCUAGGGAGAGCUGCCUAUAUGGAAGAGCCCUAAUGUGUAAAAUUAAUUUUAGUAGUGCUAUCCCCAUGUGAUUUUAAUAGCUUCUUAGGAGAAUGACAAAAAAAAAAAAAAAAAAAAAAAAAAAAAAAAA	AGCAGAGGCAGAGAGGCUCAGG
NC_045512.2	54	59	54	59	2.27	hsa-miR-376c-5p_MIMAT0022861	1	6	1	6	2.75	-2.95	-7.97	-0.347949	UUCACC&GGUGGA	((((((&))))))	CAAUCUUUAAUCAGUGUGUAACAUUAGGGAGGACUUGAAAGAGCCACCACAUUUUCACCGAGGCCACGCGGAGUACGAUCGAGUGUACAGUGAACAAUGCUAGGGAGAGCUGCCUAUAUGGAAGAGCCCUAAUGUGUAAAAUUAAUUUUAGUAGUGCUAUCCCCAUGUGAUUUUAAUAGCUUCUUAGGAGAAUGACAAAAAAAAAAAAAAAAAAAAAAAAAAAAAAAAA	GGUGGAUAUUCCUUCUAUGUU
NC_045512.2	38	43	38	43	1.24	hsa-miR-518c-3p_MIMAT0002848	11	16	11	16	0.49	-2.95	-4.68	-0.344256	AAAGAG&CUCUUU	((((((&))))))	CAAUCUUUAAUCAGUGUGUAACAUUAGGGAGGACUUGAAAGAGCCACCACAUUUUCACCGAGGCCACGCGGAGUACGAUCGAGUGUACAGUGAACAAUGCUAGGGAGAGCUGCCUAUAUGGAAGAGCCCUAAUGUGUAAAAUUAAUUUUAGUAGUGCUAUCCCCAUGUGAUUUUAAUAGCUUCUUAGGAGAAUGACAAAAAAAAAAAAAAAAAAAAAAAAAAAAAAAAA	CAAAGCGCUUCUCUUUAGAGUGU
NC_045512.2	162	171	166	171	2.96	hsa-miR-376a-3p_MIMAT0000729	1	10	1	6	1.66	-2.94	-7.56	-0.34677	CCCAUGUGAU&AUCAUAGAGG	((..((((((&))))))..))	CAAUCUUUAAUCAGUGUGUAACAUUAGGGAGGACUUGAAAGAGCCACCACAUUUUCACCGAGGCCACGCGGAGUACGAUCGAGUGUACAGUGAACAAUGCUAGGGAGAGCUGCCUAUAUGGAAGAGCCCUAAUGUGUAAAAUUAAUUUUAGUAGUGCUAUCCCCAUGUGAUUUUAAUAGCUUCUUAGGAGAAUGACAAAAAAAAAAAAAAAAAAAAAAAAAAAAAAAAA	AUCAUAGAGGAAAAUCCACGU
NC_045512.2	3	8	3	8	0.58	hsa-miR-4662a-3p_MIMAT0019732	1	6	1	6	0.38	-2.94	-3.9	-0.344878	AUCUUU&AAAGAU	((((((&))))))	CAAUCUUUAAUCAGUGUGUAACAUUAGGGAGGACUUGAAAGAGCCACCACAUUUUCACCGAGGCCACGCGGAGUACGAUCGAGUGUACAGUGAACAAUGCUAGGGAGAGCUGCCUAUAUGGAAGAGCCCUAAUGUGUAAAAUUAAUUUUAGUAGUGCUAUCCCCAUGUGAUUUUAAUAGCUUCUUAGGAGAAUGACAAAAAAAAAAAAAAAAAAAAAAAAAAAAAAAAA	AAAGAUAGACAAUUGGCUAAAU
NC_045512.2	31	37	31	36	2.59	hsa-miR-544a_MIMAT0003164	16	22	17	22	1.78	-2.94	-7.31	-0.344878	GGACUUG&CAAGUUC	(((((((&)))))))	CAAUCUUUAAUCAGUGUGUAACAUUAGGGAGGACUUGAAAGAGCCACCACAUUUUCACCGAGGCCACGCGGAGUACGAUCGAGUGUACAGUGAACAAUGCUAGGGAGAGCUGCCUAUAUGGAAGAGCCCUAAUGUGUAAAAUUAAUUUUAGUAGUGCUAUCCCCAUGUGAUUUUAAUAGCUUCUUAGGAGAAUGACAAAAAAAAAAAAAAAAAAAAAAAAAAAAAAAAA	AUUCUGCAUUUUUAGCAAGUUC
NC_045512.2	56	61	56	61	2.37	hsa-miR-29a-5p_MIMAT0004503	12	17	12	17	1.27	-2.93	-6.57	-0.343705	CACCGA&UUGGUG	((((((&))))))	CAAUCUUUAAUCAGUGUGUAACAUUAGGGAGGACUUGAAAGAGCCACCACAUUUUCACCGAGGCCACGCGGAGUACGAUCGAGUGUACAGUGAACAAUGCUAGGGAGAGCUGCCUAUAUGGAAGAGCCCUAAUGUGUAAAAUUAAUUUUAGUAGUGCUAUCCCCAUGUGAUUUUAAUAGCUUCUUAGGAGAAUGACAAAAAAAAAAAAAAAAAAAAAAAAAAAAAAAAA	ACUGAUUUCUUUUGGUGUUCAG
NC_045512.2	125	137	125	130	2.55	hsa-miR-3194-5p_MIMAT0015078	9	20	15	20	8.27	-2.92	-13.74	-0.344411	AGCCCUAAUGUGU&ACCAGGAGGGCU	((((((..((.((&))))..))))))	CAAUCUUUAAUCAGUGUGUAACAUUAGGGAGGACUUGAAAGAGCCACCACAUUUUCACCGAGGCCACGCGGAGUACGAUCGAGUGUACAGUGAACAAUGCUAGGGAGAGCUGCCUAUAUGGAAGAGCCCUAAUGUGUAAAAUUAAUUUUAGUAGUGCUAUCCCCAUGUGAUUUUAAUAGCUUCUUAGGAGAAUGACAAAAAAAAAAAAAAAAAAAAAAAAAAAAAAAAA	GGCCAGCCACCAGGAGGGCUG
NC_045512.2	4	9	4	9	0.57	hsa-miR-3664-3p_MIMAT0019220	10	15	10	15	0.05	-2.92	-3.54	-0.342531	UCUUUA&UAAAGA	((((((&))))))	CAAUCUUUAAUCAGUGUGUAACAUUAGGGAGGACUUGAAAGAGCCACCACAUUUUCACCGAGGCCACGCGGAGUACGAUCGAGUGUACAGUGAACAAUGCUAGGGAGAGCUGCCUAUAUGGAAGAGCCCUAAUGUGUAAAAUUAAUUUUAGUAGUGCUAUCCCCAUGUGAUUUUAAUAGCUUCUUAGGAGAAUGACAAAAAAAAAAAAAAAAAAAAAAAAAAAAAAAAA	UCUCAGGAGUAAAGACAGAGUU
NC_045512.2	78	83	78	83	0.67	hsa-miR-659-3p_MIMAT0003337	1	6	1	6	0.02	-2.92	-3.61	-0.342531	AUCGAG&CUUGGU	((((((&))))))	CAAUCUUUAAUCAGUGUGUAACAUUAGGGAGGACUUGAAAGAGCCACCACAUUUUCACCGAGGCCACGCGGAGUACGAUCGAGUGUACAGUGAACAAUGCUAGGGAGAGCUGCCUAUAUGGAAGAGCCCUAAUGUGUAAAAUUAAUUUUAGUAGUGCUAUCCCCAUGUGAUUUUAAUAGCUUCUUAGGAGAAUGACAAAAAAAAAAAAAAAAAAAAAAAAAAAAAAAAA	CUUGGUUCAGGGAGGGUCCCCA
NC_045512.2	188	197	192	197	1.06	hsa-miR-148b-5p_MIMAT0004699	7	18	7	12	1.6	-2.91	-5.57	-0.341358	GAGAAUGACA&UGUUAUACACUC	(((.((((((&))))))...)))	CAAUCUUUAAUCAGUGUGUAACAUUAGGGAGGACUUGAAAGAGCCACCACAUUUUCACCGAGGCCACGCGGAGUACGAUCGAGUGUACAGUGAACAAUGCUAGGGAGAGCUGCCUAUAUGGAAGAGCCCUAAUGUGUAAAAUUAAUUUUAGUAGUGCUAUCCCCAUGUGAUUUUAAUAGCUUCUUAGGAGAAUGACAAAAAAAAAAAAAAAAAAAAAAAAAAAAAAAAA	AAGUUCUGUUAUACACUCAGGC
NC_045512.2	186	191	186	191	2.54	hsa-miR-3059-5p_MIMAT0048633	1	6	1	6	0.01	-2.9	-5.45	-0.336748	AGGAGA&UUUCCU	((((((&))))))	CAAUCUUUAAUCAGUGUGUAACAUUAGGGAGGACUUGAAAGAGCCACCACAUUUUCACCGAGGCCACGCGGAGUACGAUCGAGUGUACAGUGAACAAUGCUAGGGAGAGCUGCCUAUAUGGAAGAGCCCUAAUGUGUAAAAUUAAUUUUAGUAGUGCUAUCCCCAUGUGAUUUUAAUAGCUUCUUAGGAGAAUGACAAAAAAAAAAAAAAAAAAAAAAAAAAAAAAAAA	UUUCCUCUCUGCCCCAUAGGGUGU
NC_045512.2	186	195	187	192	2.98	hsa-miR-5187-3p_MIMAT0021118	10	18	12	17	0.99	-2.9	-6.87	-0.342052	AGGAGAAUGA&UCUUUUCCU	(((((((.((&)))))))))	CAAUCUUUAAUCAGUGUGUAACAUUAGGGAGGACUUGAAAGAGCCACCACAUUUUCACCGAGGCCACGCGGAGUACGAUCGAGUGUACAGUGAACAAUGCUAGGGAGAGCUGCCUAUAUGGAAGAGCCCUAAUGUGUAAAAUUAAUUUUAGUAGUGCUAUCCCCAUGUGAUUUUAAUAGCUUCUUAGGAGAAUGACAAAAAAAAAAAAAAAAAAAAAAAAAAAAAAAAA	ACUGAAUCCUCUUUUCCUCAG
NC_045512.2	189	195	190	195	0.93	hsa-miR-4677-5p_MIMAT0019760	1	7	1	6	0	-2.89	-3.82	-0.339012	AGAAUGA&UUGUUCU	(((((((&)))))))	CAAUCUUUAAUCAGUGUGUAACAUUAGGGAGGACUUGAAAGAGCCACCACAUUUUCACCGAGGCCACGCGGAGUACGAUCGAGUGUACAGUGAACAAUGCUAGGGAGAGCUGCCUAUAUGGAAGAGCCCUAAUGUGUAAAAUUAAUUUUAGUAGUGCUAUCCCCAUGUGAUUUUAAUAGCUUCUUAGGAGAAUGACAAAAAAAAAAAAAAAAAAAAAAAAAAAAAAAAA	UUGUUCUUUGGUCUUUCAGCCA
NC_045512.2	84	89	84	89	2.45	hsa-miR-660-3p_MIMAT0022711	9	14	9	14	0.54	-2.89	-5.88	-0.340872	UGUACA&UGUGCA	((((((&))))))	CAAUCUUUAAUCAGUGUGUAACAUUAGGGAGGACUUGAAAGAGCCACCACAUUUUCACCGAGGCCACGCGGAGUACGAUCGAGUGUACAGUGAACAAUGCUAGGGAGAGCUGCCUAUAUGGAAGAGCCCUAAUGUGUAAAAUUAAUUUUAGUAGUGCUAUCCCCAUGUGAUUUUAAUAGCUUCUUAGGAGAAUGACAAAAAAAAAAAAAAAAAAAAAAAAAAAAAAAAA	ACCUCCUGUGUGCAUGGAUUA
NC_045512.2	117	139	134	139	4.24	hsa-miR-363-3p_MIMAT0000707	3	22	3	8	2.16	-2.88	-9.28	-0.337839	UAUGGAAGAGCCCUAAUGUGUAA&UUGCACGGUAUCCAUCUGUA	((((((.((..((....((((((&))))))))..))..))))))	CAAUCUUUAAUCAGUGUGUAACAUUAGGGAGGACUUGAAAGAGCCACCACAUUUUCACCGAGGCCACGCGGAGUACGAUCGAGUGUACAGUGAACAAUGCUAGGGAGAGCUGCCUAUAUGGAAGAGCCCUAAUGUGUAAAAUUAAUUUUAGUAGUGCUAUCCCCAUGUGAUUUUAAUAGCUUCUUAGGAGAAUGACAAAAAAAAAAAAAAAAAAAAAAAAAAAAAAAAA	AAUUGCACGGUAUCCAUCUGUA
NC_045512.2	186	191	186	191	2.54	hsa-miR-376a-2-5p_MIMAT0022928	8	13	8	13	0.04	-2.88	-5.46	-0.339693	AGGAGA&UUUCCU	((((((&))))))	CAAUCUUUAAUCAGUGUGUAACAUUAGGGAGGACUUGAAAGAGCCACCACAUUUUCACCGAGGCCACGCGGAGUACGAUCGAGUGUACAGUGAACAAUGCUAGGGAGAGCUGCCUAUAUGGAAGAGCCCUAAUGUGUAAAAUUAAUUUUAGUAGUGCUAUCCCCAUGUGAUUUUAAUAGCUUCUUAGGAGAAUGACAAAAAAAAAAAAAAAAAAAAAAAAAAAAAAAAA	GGUAGAUUUUCCUUCUAUGGU
NC_045512.2	87	92	87	92	1.99	hsa-miR-181a-5p_MIMAT0000256	10	15	10	15	2.34	-2.86	-7.19	-0.333753	ACAGUG&CGCUGU	((((((&))))))	CAAUCUUUAAUCAGUGUGUAACAUUAGGGAGGACUUGAAAGAGCCACCACAUUUUCACCGAGGCCACGCGGAGUACGAUCGAGUGUACAGUGAACAAUGCUAGGGAGAGCUGCCUAUAUGGAAGAGCCCUAAUGUGUAAAAUUAAUUUUAGUAGUGCUAUCCCCAUGUGAUUUUAAUAGCUUCUUAGGAGAAUGACAAAAAAAAAAAAAAAAAAAAAAAAAAAAAAAAA	AACAUUCAACGCUGUCGGUGAGU
NC_045512.2	50	63	50	55	4.03	hsa-miR-510-3p_MIMAT0026613	8	19	14	19	1.46	-2.86	-8.35	-0.337334	CAUUUUCACCGAGG&CCUCUAAGAGUG	((((((....((((&))))..))))))	CAAUCUUUAAUCAGUGUGUAACAUUAGGGAGGACUUGAAAGAGCCACCACAUUUUCACCGAGGCCACGCGGAGUACGAUCGAGUGUACAGUGAACAAUGCUAGGGAGAGCUGCCUAUAUGGAAGAGCCCUAAUGUGUAAAAUUAAUUUUAGUAGUGCUAUCCCCAUGUGAUUUUAAUAGCUUCUUAGGAGAAUGACAAAAAAAAAAAAAAAAAAAAAAAAAAAAAAAAA	AUUGAAACCUCUAAGAGUGGA
NC_045512.2	178	183	178	183	1.98	hsa-miR-3928-3p_MIMAT0018205	12	17	12	17	2.12	-2.84	-6.94	-0.333147	AGCUUC&GGAGCU	((((((&))))))	CAAUCUUUAAUCAGUGUGUAACAUUAGGGAGGACUUGAAAGAGCCACCACAUUUUCACCGAGGCCACGCGGAGUACGAUCGAGUGUACAGUGAACAAUGCUAGGGAGAGCUGCCUAUAUGGAAGAGCCCUAAUGUGUAAAAUUAAUUUUAGUAGUGCUAUCCCCAUGUGAUUUUAAUAGCUUCUUAGGAGAAUGACAAAAAAAAAAAAAAAAAAAAAAAAAAAAAAAAA	GGAGGAACCUUGGAGCUUCGGC
NC_045512.2	184	189	184	189	3.13	hsa-miR-4661-5p_MIMAT0019729	16	21	16	21	0.11	-2.83	-6.07	-0.331974	UUAGGA&UCCUGA	((((((&))))))	CAAUCUUUAAUCAGUGUGUAACAUUAGGGAGGACUUGAAAGAGCCACCACAUUUUCACCGAGGCCACGCGGAGUACGAUCGAGUGUACAGUGAACAAUGCUAGGGAGAGCUGCCUAUAUGGAAGAGCCCUAAUGUGUAAAAUUAAUUUUAGUAGUGCUAUCCCCAUGUGAUUUUAAUAGCUUCUUAGGAGAAUGACAAAAAAAAAAAAAAAAAAAAAAAAAAAAAAAAA	AACUAGCUCUGUGGAUCCUGAC
NC_045512.2	148	154	148	153	1.8	hsa-miR-654-3p_MIMAT0004814	6	12	7	12	2.05	-2.83	-6.68	-0.331974	UUAGUAG&CUGCUGA	(((((((&)))))))	CAAUCUUUAAUCAGUGUGUAACAUUAGGGAGGACUUGAAAGAGCCACCACAUUUUCACCGAGGCCACGCGGAGUACGAUCGAGUGUACAGUGAACAAUGCUAGGGAGAGCUGCCUAUAUGGAAGAGCCCUAAUGUGUAAAAUUAAUUUUAGUAGUGCUAUCCCCAUGUGAUUUUAAUAGCUUCUUAGGAGAAUGACAAAAAAAAAAAAAAAAAAAAAAAAAAAAAAAAA	UAUGUCUGCUGACCAUCACCUU
NC_045512.2	163	168	163	168	2.6	hsa-miR-380-3p_MIMAT0000735	7	12	7	12	0.5	-2.82	-5.92	-0.330801	CCAUGU&AUAUGG	((((((&))))))	CAAUCUUUAAUCAGUGUGUAACAUUAGGGAGGACUUGAAAGAGCCACCACAUUUUCACCGAGGCCACGCGGAGUACGAUCGAGUGUACAGUGAACAAUGCUAGGGAGAGCUGCCUAUAUGGAAGAGCCCUAAUGUGUAAAAUUAAUUUUAGUAGUGCUAUCCCCAUGUGAUUUUAAUAGCUUCUUAGGAGAAUGACAAAAAAAAAAAAAAAAAAAAAAAAAAAAAAAAA	UAUGUAAUAUGGUCCACAUCUU
NC_045512.2	51	59	51	56	2.27	hsa-miR-4755-3p_MIMAT0019896	15	22	17	22	0.73	-2.82	-5.82	-0.330801	AUUUUCACC&GGGAAAGU	((((((.((&))))))))	CAAUCUUUAAUCAGUGUGUAACAUUAGGGAGGACUUGAAAGAGCCACCACAUUUUCACCGAGGCCACGCGGAGUACGAUCGAGUGUACAGUGAACAAUGCUAGGGAGAGCUGCCUAUAUGGAAGAGCCCUAAUGUGUAAAAUUAAUUUUAGUAGUGCUAUCCCCAUGUGAUUUUAAUAGCUUCUUAGGAGAAUGACAAAAAAAAAAAAAAAAAAAAAAAAAAAAAAAAA	AGCCAGGCUCUGAAGGGAAAGU
NC_045512.2	108	113	108	113	1.44	hsa-miR-548e-5p_MIMAT0026736	12	17	12	17	2.25	-2.82	-6.51	-0.330801	AGCUGC&GCGGUU	((((((&))))))	CAAUCUUUAAUCAGUGUGUAACAUUAGGGAGGACUUGAAAGAGCCACCACAUUUUCACCGAGGCCACGCGGAGUACGAUCGAGUGUACAGUGAACAAUGCUAGGGAGAGCUGCCUAUAUGGAAGAGCCCUAAUGUGUAAAAUUAAUUUUAGUAGUGCUAUCCCCAUGUGAUUUUAAUAGCUUCUUAGGAGAAUGACAAAAAAAAAAAAAAAAAAAAAAAAAAAAAAAAA	CAAAAGCAAUCGCGGUUUUUGC
NC_045512.2	182	188	183	188	2.97	hsa-miR-584-5p_MIMAT0003249	11	17	11	16	2.12	-2.82	-7.91	-0.330801	UCUUAGG&CCUGGGA	(((((((&)))))))	CAAUCUUUAAUCAGUGUGUAACAUUAGGGAGGACUUGAAAGAGCCACCACAUUUUCACCGAGGCCACGCGGAGUACGAUCGAGUGUACAGUGAACAAUGCUAGGGAGAGCUGCCUAUAUGGAAGAGCCCUAAUGUGUAAAAUUAAUUUUAGUAGUGCUAUCCCCAUGUGAUUUUAAUAGCUUCUUAGGAGAAUGACAAAAAAAAAAAAAAAAAAAAAAAAAAAAAAAAA	UUAUGGUUUGCCUGGGACUGAG
NC_045512.2	176	185	176	181	2.64	hsa-miR-7154-3p_MIMAT0028219	4	15	10	15	0.31	-2.81	-5.76	-0.333355	AUAGCUUCUU&AGGACAAGUUGU	((((((((((&))))..))))))	CAAUCUUUAAUCAGUGUGUAACAUUAGGGAGGACUUGAAAGAGCCACCACAUUUUCACCGAGGCCACGCGGAGUACGAUCGAGUGUACAGUGAACAAUGCUAGGGAGAGCUGCCUAUAUGGAAGAGCCCUAAUGUGUAAAAUUAAUUUUAGUAGUGCUAUCCCCAUGUGAUUUUAAUAGCUUCUUAGGAGAAUGACAAAAAAAAAAAAAAAAAAAAAAAAAAAAAAAAA	AGGAGGACAAGUUGUGGGAU
NC_045512.2	17	22	17	22	0.96	hsa-miR-92a-1-5p_MIMAT0004507	13	18	13	18	2.12	-2.8	-5.88	-0.326751	UGUAAC&GUUGCA	((((((&))))))	CAAUCUUUAAUCAGUGUGUAACAUUAGGGAGGACUUGAAAGAGCCACCACAUUUUCACCGAGGCCACGCGGAGUACGAUCGAGUGUACAGUGAACAAUGCUAGGGAGAGCUGCCUAUAUGGAAGAGCCCUAAUGUGUAAAAUUAAUUUUAGUAGUGCUAUCCCCAUGUGAUUUUAAUAGCUUCUUAGGAGAAUGACAAAAAAAAAAAAAAAAAAAAAAAAAAAAAAAAA	AGGUUGGGAUCGGUUGCAAUGCU
NC_045512.2	13	28	20	25	4.18	hsa-miR-199b-5p_MIMAT0000263	1	15	4	9	1.41	-2.79	-8.38	-0.325584	AGUGUGUAACAUUAGG&CCCAGUGUUUAGACU	(((....((((((.((&)).))))))...)))	CAAUCUUUAAUCAGUGUGUAACAUUAGGGAGGACUUGAAAGAGCCACCACAUUUUCACCGAGGCCACGCGGAGUACGAUCGAGUGUACAGUGAACAAUGCUAGGGAGAGCUGCCUAUAUGGAAGAGCCCUAAUGUGUAAAAUUAAUUUUAGUAGUGCUAUCCCCAUGUGAUUUUAAUAGCUUCUUAGGAGAAUGACAAAAAAAAAAAAAAAAAAAAAAAAAAAAAAAAA	CCCAGUGUUUAGACUAUCUGUUC
NC_045512.2	108	113	108	113	1.44	hsa-miR-219a-2-3p_MIMAT0004675	7	12	7	12	1.75	-2.79	-5.98	-0.327282	AGCUGC&GUGGCU	((((((&))))))	CAAUCUUUAAUCAGUGUGUAACAUUAGGGAGGACUUGAAAGAGCCACCACAUUUUCACCGAGGCCACGCGGAGUACGAUCGAGUGUACAGUGAACAAUGCUAGGGAGAGCUGCCUAUAUGGAAGAGCCCUAAUGUGUAAAAUUAAUUUUAGUAGUGCUAUCCCCAUGUGAUUUUAAUAGCUUCUUAGGAGAAUGACAAAAAAAAAAAAAAAAAAAAAAAAAAAAAAAAA	AGAAUUGUGGCUGGACAUCUGU
NC_045512.2	167	172	167	172	2.13	hsa-miR-548e-5p_MIMAT0026736	8	13	8	13	0.03	-2.79	-4.95	-0.327282	GUGAUU&AAUCGC	((((((&))))))	CAAUCUUUAAUCAGUGUGUAACAUUAGGGAGGACUUGAAAGAGCCACCACAUUUUCACCGAGGCCACGCGGAGUACGAUCGAGUGUACAGUGAACAAUGCUAGGGAGAGCUGCCUAUAUGGAAGAGCCCUAAUGUGUAAAAUUAAUUUUAGUAGUGCUAUCCCCAUGUGAUUUUAAUAGCUUCUUAGGAGAAUGACAAAAAAAAAAAAAAAAAAAAAAAAAAAAAAAAA	CAAAAGCAAUCGCGGUUUUUGC
NC_045512.2	145	159	154	159	2.67	hsa-miR-5682_MIMAT0022470	2	17	2	7	3.95	-2.79	-9.41	-0.327282	AUUUUAGUAGUGCUA&UAGCACCUUGCAGGAU	(((((.(((((((((&))))))..))))))))	CAAUCUUUAAUCAGUGUGUAACAUUAGGGAGGACUUGAAAGAGCCACCACAUUUUCACCGAGGCCACGCGGAGUACGAUCGAGUGUACAGUGAACAAUGCUAGGGAGAGCUGCCUAUAUGGAAGAGCCCUAAUGUGUAAAAUUAAUUUUAGUAGUGCUAUCCCCAUGUGAUUUUAAUAGCUUCUUAGGAGAAUGACAAAAAAAAAAAAAAAAAAAAAAAAAAAAAAAAA	GUAGCACCUUGCAGGAUAAGGU
NC_045512.2	120	128	123	128	3.22	hsa-miR-548am-5p_MIMAT0022740	13	22	13	18	1.72	-2.78	-7.72	-0.326109	GGAAGAGCC&GGUUUUUGCC	(((((((((&))))))).))	CAAUCUUUAAUCAGUGUGUAACAUUAGGGAGGACUUGAAAGAGCCACCACAUUUUCACCGAGGCCACGCGGAGUACGAUCGAGUGUACAGUGAACAAUGCUAGGGAGAGCUGCCUAUAUGGAAGAGCCCUAAUGUGUAAAAUUAAUUUUAGUAGUGCUAUCCCCAUGUGAUUUUAAUAGCUUCUUAGGAGAAUGACAAAAAAAAAAAAAAAAAAAAAAAAAAAAAAAAA	AAAAGUAAUUGCGGUUUUUGCC
NC_045512.2	120	128	123	128	3.22	hsa-miR-548o-5p_MIMAT0022738	13	22	13	18	1.72	-2.78	-7.72	-0.326109	GGAAGAGCC&GGUUUUUGCC	(((((((((&))))))).))	CAAUCUUUAAUCAGUGUGUAACAUUAGGGAGGACUUGAAAGAGCCACCACAUUUUCACCGAGGCCACGCGGAGUACGAUCGAGUGUACAGUGAACAAUGCUAGGGAGAGCUGCCUAUAUGGAAGAGCCCUAAUGUGUAAAAUUAAUUUUAGUAGUGCUAUCCCCAUGUGAUUUUAAUAGCUUCUUAGGAGAAUGACAAAAAAAAAAAAAAAAAAAAAAAAAAAAAAAAA	AAAAGUAAUUGCGGUUUUUGCC
NC_045512.2	4	9	4	9	0.57	hsa-miR-139-3p_MIMAT0004552	1	6	1	6	0.23	-2.77	-3.57	-0.32325	UCUUUA&UGGAGA	((((((&))))))	CAAUCUUUAAUCAGUGUGUAACAUUAGGGAGGACUUGAAAGAGCCACCACAUUUUCACCGAGGCCACGCGGAGUACGAUCGAGUGUACAGUGAACAAUGCUAGGGAGAGCUGCCUAUAUGGAAGAGCCCUAAUGUGUAAAAUUAAUUUUAGUAGUGCUAUCCCCAUGUGAUUUUAAUAGCUUCUUAGGAGAAUGACAAAAAAAAAAAAAAAAAAAAAAAAAAAAAAAAA	UGGAGACGCGGCCCUGUUGGAGU
NC_045512.2	48	53	48	53	1.73	hsa-miR-1912-3p_MIMAT0007887	15	20	15	20	0.98	-2.77	-5.48	-0.324936	CACAUU&AGUGUG	((((((&))))))	CAAUCUUUAAUCAGUGUGUAACAUUAGGGAGGACUUGAAAGAGCCACCACAUUUUCACCGAGGCCACGCGGAGUACGAUCGAGUGUACAGUGAACAAUGCUAGGGAGAGCUGCCUAUAUGGAAGAGCCCUAAUGUGUAAAAUUAAUUUUAGUAGUGCUAUCCCCAUGUGAUUUUAAUAGCUUCUUAGGAGAAUGACAAAAAAAAAAAAAAAAAAAAAAAAAAAAAAAAA	UACCCAGAGCAUGCAGUGUGAA
NC_045512.2	179	184	179	184	1.04	hsa-miR-2276-3p_MIMAT0011775	13	18	13	18	2.44	-2.77	-6.25	-0.324936	GCUUCU&AGAGGC	((((((&))))))	CAAUCUUUAAUCAGUGUGUAACAUUAGGGAGGACUUGAAAGAGCCACCACAUUUUCACCGAGGCCACGCGGAGUACGAUCGAGUGUACAGUGAACAAUGCUAGGGAGAGCUGCCUAUAUGGAAGAGCCCUAAUGUGUAAAAUUAAUUUUAGUAGUGCUAUCCCCAUGUGAUUUUAAUAGCUUCUUAGGAGAAUGACAAAAAAAAAAAAAAAAAAAAAAAAAAAAAAAAA	UCUGCAAGUGUCAGAGGCGAGG
NC_045512.2	20	25	20	25	0.67	hsa-miR-5000-5p_MIMAT0021019	10	15	10	15	0.06	-2.77	-3.5	-0.324936	AACAUU&AGUGUU	((((((&))))))	CAAUCUUUAAUCAGUGUGUAACAUUAGGGAGGACUUGAAAGAGCCACCACAUUUUCACCGAGGCCACGCGGAGUACGAUCGAGUGUACAGUGAACAAUGCUAGGGAGAGCUGCCUAUAUGGAAGAGCCCUAAUGUGUAAAAUUAAUUUUAGUAGUGCUAUCCCCAUGUGAUUUUAAUAGCUUCUUAGGAGAAUGACAAAAAAAAAAAAAAAAAAAAAAAAAAAAAAAAA	CAGUUCAGAAGUGUUCCUGAGU
NC_045512.2	4	9	4	9	0.57	hsa-miR-5004-5p_MIMAT0021027	1	6	1	6	0.36	-2.76	-3.69	-0.323763	UCUUUA&UGAGGA	((((((&))))))	CAAUCUUUAAUCAGUGUGUAACAUUAGGGAGGACUUGAAAGAGCCACCACAUUUUCACCGAGGCCACGCGGAGUACGAUCGAGUGUACAGUGAACAAUGCUAGGGAGAGCUGCCUAUAUGGAAGAGCCCUAAUGUGUAAAAUUAAUUUUAGUAGUGCUAUCCCCAUGUGAUUUUAAUAGCUUCUUAGGAGAAUGACAAAAAAAAAAAAAAAAAAAAAAAAAAAAAAAAA	UGAGGACAGGGCAAAUUCACGA
NC_045512.2	179	189	179	184	3.79	hsa-miR-526b-3p_MIMAT0002836	10	22	17	22	4.15	-2.76	-10.7	-0.323763	GCUUCUUAGGA&UCCUUUUAGAGGC	((((((.((((&))))...))))))	CAAUCUUUAAUCAGUGUGUAACAUUAGGGAGGACUUGAAAGAGCCACCACAUUUUCACCGAGGCCACGCGGAGUACGAUCGAGUGUACAGUGAACAAUGCUAGGGAGAGCUGCCUAUAUGGAAGAGCCCUAAUGUGUAAAAUUAAUUUUAGUAGUGCUAUCCCCAUGUGAUUUUAAUAGCUUCUUAGGAGAAUGACAAAAAAAAAAAAAAAAAAAAAAAAAAAAAAAAA	GAAAGUGCUUCCUUUUAGAGGC
NC_045512.2	67	80	67	72	4.82	hsa-miR-10a-5p_MIMAT0000253	10	23	18	23	0.2	-2.75	-7.77	-0.320916	CGCGGAGUACGAUC&GAUCCGAAUUUGUG	((((((....((((&))))....))))))	CAAUCUUUAAUCAGUGUGUAACAUUAGGGAGGACUUGAAAGAGCCACCACAUUUUCACCGAGGCCACGCGGAGUACGAUCGAGUGUACAGUGAACAAUGCUAGGGAGAGCUGCCUAUAUGGAAGAGCCCUAAUGUGUAAAAUUAAUUUUAGUAGUGCUAUCCCCAUGUGAUUUUAAUAGCUUCUUAGGAGAAUGACAAAAAAAAAAAAAAAAAAAAAAAAAAAAAAAAA	UACCCUGUAGAUCCGAAUUUGUG
NC_045512.2	142	162	152	157	3.26	hsa-miR-342-5p_MIMAT0004694	2	21	5	10	1	-2.75	-7.01	-0.32436	UUAAUUUUAGUAGUGCUAUCC&GGGGUGCUAUCUGUGAUUGA	(((((...((((((((...((&)).)))))).))...)))))	CAAUCUUUAAUCAGUGUGUAACAUUAGGGAGGACUUGAAAGAGCCACCACAUUUUCACCGAGGCCACGCGGAGUACGAUCGAGUGUACAGUGAACAAUGCUAGGGAGAGCUGCCUAUAUGGAAGAGCCCUAAUGUGUAAAAUUAAUUUUAGUAGUGCUAUCCCCAUGUGAUUUUAAUAGCUUCUUAGGAGAAUGACAAAAAAAAAAAAAAAAAAAAAAAAAAAAAAAAA	AGGGGUGCUAUCUGUGAUUGA
NC_045512.2	153	159	154	159	2.39	hsa-miR-3663-5p_MIMAT0018084	12	18	12	17	0.51	-2.75	-5.65	-0.32436	AGUGCUA&UGGUGCU	(((((((&)))))))	CAAUCUUUAAUCAGUGUGUAACAUUAGGGAGGACUUGAAAGAGCCACCACAUUUUCACCGAGGCCACGCGGAGUACGAUCGAGUGUACAGUGAACAAUGCUAGGGAGAGCUGCCUAUAUGGAAGAGCCCUAAUGUGUAAAAUUAAUUUUAGUAGUGCUAUCCCCAUGUGAUUUUAAUAGCUUCUUAGGAGAAUGACAAAAAAAAAAAAAAAAAAAAAAAAAAAAAAAAA	GCUGGUCUGCGUGGUGCUCGG
NC_045512.2	169	176	170	175	1.41	hsa-miR-29c-3p_MIMAT0000681	10	17	11	16	0.27	-2.74	-4.42	-0.321417	GAUUUUAA&UUGAAAUC	((((((((&))))))))	CAAUCUUUAAUCAGUGUGUAACAUUAGGGAGGACUUGAAAGAGCCACCACAUUUUCACCGAGGCCACGCGGAGUACGAUCGAGUGUACAGUGAACAAUGCUAGGGAGAGCUGCCUAUAUGGAAGAGCCCUAAUGUGUAAAAUUAAUUUUAGUAGUGCUAUCCCCAUGUGAUUUUAAUAGCUUCUUAGGAGAAUGACAAAAAAAAAAAAAAAAAAAAAAAAAAAAAAAAA	UAGCACCAUUUGAAAUCGGUUA
NC_045512.2	46	59	53	58	2.43	hsa-miR-370-3p_MIMAT0000722	10	22	11	16	5.33	-2.74	-10.5	-0.321417	ACCACAUUUUCACC&GGUGGAACCUGGU	((((...(((((((&)))))))..))))	CAAUCUUUAAUCAGUGUGUAACAUUAGGGAGGACUUGAAAGAGCCACCACAUUUUCACCGAGGCCACGCGGAGUACGAUCGAGUGUACAGUGAACAAUGCUAGGGAGAGCUGCCUAUAUGGAAGAGCCCUAAUGUGUAAAAUUAAUUUUAGUAGUGCUAUCCCCAUGUGAUUUUAAUAGCUUCUUAGGAGAAUGACAAAAAAAAAAAAAAAAAAAAAAAAAAAAAAAAA	GCCUGCUGGGGUGGAACCUGGU
NC_045512.2	109	124	119	124	5.8	hsa-miR-30e-3p_MIMAT0000693	1	22	1	6	0.4	-2.73	-8.93	-0.320243	GCUGCCUAUAUGGAAG&CUUUCAGUCGGAUGUUUACAGC	((((((....((((((&))))))...)).......))))	CAAUCUUUAAUCAGUGUGUAACAUUAGGGAGGACUUGAAAGAGCCACCACAUUUUCACCGAGGCCACGCGGAGUACGAUCGAGUGUACAGUGAACAAUGCUAGGGAGAGCUGCCUAUAUGGAAGAGCCCUAAUGUGUAAAAUUAAUUUUAGUAGUGCUAUCCCCAUGUGAUUUUAAUAGCUUCUUAGGAGAAUGACAAAAAAAAAAAAAAAAAAAAAAAAAAAAAAAAA	CUUUCAGUCGGAUGUUUACAGC
NC_045512.2	54	59	54	59	2.27	hsa-miR-186-3p_MIMAT0004612	8	13	8	13	2.26	-2.72	-7.25	-0.31907	UUCACC&GGUGAA	((((((&))))))	CAAUCUUUAAUCAGUGUGUAACAUUAGGGAGGACUUGAAAGAGCCACCACAUUUUCACCGAGGCCACGCGGAGUACGAUCGAGUGUACAGUGAACAAUGCUAGGGAGAGCUGCCUAUAUGGAAGAGCCCUAAUGUGUAAAAUUAAUUUUAGUAGUGCUAUCCCCAUGUGAUUUUAAUAGCUUCUUAGGAGAAUGACAAAAAAAAAAAAAAAAAAAAAAAAAAAAAAAAA	GCCCAAAGGUGAAUUUUUUGGG
NC_045512.2	167	172	167	172	2.13	hsa-miR-212-3p_MIMAT0000269	12	17	12	17	0.06	-2.72	-4.91	-0.320821	GUGAUU&AGUCAC	((((((&))))))	CAAUCUUUAAUCAGUGUGUAACAUUAGGGAGGACUUGAAAGAGCCACCACAUUUUCACCGAGGCCACGCGGAGUACGAUCGAGUGUACAGUGAACAAUGCUAGGGAGAGCUGCCUAUAUGGAAGAGCCCUAAUGUGUAAAAUUAAUUUUAGUAGUGCUAUCCCCAUGUGAUUUUAAUAGCUUCUUAGGAGAAUGACAAAAAAAAAAAAAAAAAAAAAAAAAAAAAAAAA	UAACAGUCUCCAGUCACGGCC
NC_045512.2	113	118	113	118	3.29	hsa-miR-454-3p_MIMAT0003885	16	21	16	21	0.27	-2.71	-6.27	-0.316248	CCUAUA&UAUAGG	((((((&))))))	CAAUCUUUAAUCAGUGUGUAACAUUAGGGAGGACUUGAAAGAGCCACCACAUUUUCACCGAGGCCACGCGGAGUACGAUCGAGUGUACAGUGAACAAUGCUAGGGAGAGCUGCCUAUAUGGAAGAGCCCUAAUGUGUAAAAUUAAUUUUAGUAGUGCUAUCCCCAUGUGAUUUUAAUAGCUUCUUAGGAGAAUGACAAAAAAAAAAAAAAAAAAAAAAAAAAAAAAAAA	UAGUGCAAUAUUGCUUAUAGGGU
NC_045512.2	84	89	84	89	2.45	hsa-miR-3944-5p_MIMAT0019231	1	6	1	6	0.85	-2.7	-6	-0.318462	UGUACA&UGUGCA	((((((&))))))	CAAUCUUUAAUCAGUGUGUAACAUUAGGGAGGACUUGAAAGAGCCACCACAUUUUCACCGAGGCCACGCGGAGUACGAUCGAGUGUACAGUGAACAAUGCUAGGGAGAGCUGCCUAUAUGGAAGAGCCCUAAUGUGUAAAAUUAAUUUUAGUAGUGCUAUCCCCAUGUGAUUUUAAUAGCUUCUUAGGAGAAUGACAAAAAAAAAAAAAAAAAAAAAAAAAAAAAAAAA	UGUGCAGCAGGCCAACCGAGA
NC_045512.2	175	180	175	180	1.76	hsa-miR-3064-5p_MIMAT0019864	5	10	5	10	1.23	-2.68	-5.67	-0.316103	AAUAGC&GCUGUU	((((((&))))))	CAAUCUUUAAUCAGUGUGUAACAUUAGGGAGGACUUGAAAGAGCCACCACAUUUUCACCGAGGCCACGCGGAGUACGAUCGAGUGUACAGUGAACAAUGCUAGGGAGAGCUGCCUAUAUGGAAGAGCCCUAAUGUGUAAAAUUAAUUUUAGUAGUGCUAUCCCCAUGUGAUUUUAAUAGCUUCUUAGGAGAAUGACAAAAAAAAAAAAAAAAAAAAAAAAAAAAAAAAA	UCUGGCUGUUGUGGUGUGCAA
NC_045512.2	95	104	99	104	4.03	hsa-miR-27b-5p_MIMAT0004588	5	16	5	10	1.4	-2.68	-8.11	-0.314378	CAAUGCUAGG&CUUAGCUGAUUG	((((((((((&))))))..))))	CAAUCUUUAAUCAGUGUGUAACAUUAGGGAGGACUUGAAAGAGCCACCACAUUUUCACCGAGGCCACGCGGAGUACGAUCGAGUGUACAGUGAACAAUGCUAGGGAGAGCUGCCUAUAUGGAAGAGCCCUAAUGUGUAAAAUUAAUUUUAGUAGUGCUAUCCCCAUGUGAUUUUAAUAGCUUCUUAGGAGAAUGACAAAAAAAAAAAAAAAAAAAAAAAAAAAAAAAAA	AGAGCUUAGCUGAUUGGUGAAC
NC_045512.2	162	171	166	171	2.96	hsa-miR-376b-3p_MIMAT0002172	1	10	1	6	1.93	-2.67	-7.56	-0.313205	CCCAUGUGAU&AUCAUAGAGG	((..((((((&))))))..))	CAAUCUUUAAUCAGUGUGUAACAUUAGGGAGGACUUGAAAGAGCCACCACAUUUUCACCGAGGCCACGCGGAGUACGAUCGAGUGUACAGUGAACAAUGCUAGGGAGAGCUGCCUAUAUGGAAGAGCCCUAAUGUGUAAAAUUAAUUUUAGUAGUGCUAUCCCCAUGUGAUUUUAAUAGCUUCUUAGGAGAAUGACAAAAAAAAAAAAAAAAAAAAAAAAAAAAAAAAA	AUCAUAGAGGAAAAUCCAUGUU
NC_045512.2	191	196	191	196	0.55	hsa-miR-548at-5p_MIMAT0022277	5	10	5	10	0.3	-2.67	-3.52	-0.313205	AAUGAC&GUUAUU	((((((&))))))	CAAUCUUUAAUCAGUGUGUAACAUUAGGGAGGACUUGAAAGAGCCACCACAUUUUCACCGAGGCCACGCGGAGUACGAUCGAGUGUACAGUGAACAAUGCUAGGGAGAGCUGCCUAUAUGGAAGAGCCCUAAUGUGUAAAAUUAAUUUUAGUAGUGCUAUCCCCAUGUGAUUUUAAUAGCUUCUUAGGAGAAUGACAAAAAAAAAAAAAAAAAAAAAAAAAAAAAAAAA	AAAAGUUAUUGCGGUUUUGGCU
NC_045512.2	177	183	178	183	2.18	hsa-miR-744-5p_MIMAT0004945	4	10	4	9	2.74	-2.66	-7.58	-0.312032	UAGCUUC&GGGGCUA	(((((((&)))))))	CAAUCUUUAAUCAGUGUGUAACAUUAGGGAGGACUUGAAAGAGCCACCACAUUUUCACCGAGGCCACGCGGAGUACGAUCGAGUGUACAGUGAACAAUGCUAGGGAGAGCUGCCUAUAUGGAAGAGCCCUAAUGUGUAAAAUUAAUUUUAGUAGUGCUAUCCCCAUGUGAUUUUAAUAGCUUCUUAGGAGAAUGACAAAAAAAAAAAAAAAAAAAAAAAAAAAAAAAAA	UGCGGGGCUAGGGCUAACAGCA
NC_045512.2	166	171	166	171	2.17	hsa-miR-148b-3p_MIMAT0000759	8	13	8	13	0.93	-2.65	-5.75	-0.310859	UGUGAU&AUCACA	((((((&))))))	CAAUCUUUAAUCAGUGUGUAACAUUAGGGAGGACUUGAAAGAGCCACCACAUUUUCACCGAGGCCACGCGGAGUACGAUCGAGUGUACAGUGAACAAUGCUAGGGAGAGCUGCCUAUAUGGAAGAGCCCUAAUGUGUAAAAUUAAUUUUAGUAGUGCUAUCCCCAUGUGAUUUUAAUAGCUUCUUAGGAGAAUGACAAAAAAAAAAAAAAAAAAAAAAAAAAAAAAAAA	UCAGUGCAUCACAGAACUUUGU
NC_045512.2	34	39	34	39	1.61	hsa-miR-362-3p_MIMAT0004683	11	16	11	16	1.41	-2.65	-5.67	-0.310859	CUUGAA&UUCAAG	((((((&))))))	CAAUCUUUAAUCAGUGUGUAACAUUAGGGAGGACUUGAAAGAGCCACCACAUUUUCACCGAGGCCACGCGGAGUACGAUCGAGUGUACAGUGAACAAUGCUAGGGAGAGCUGCCUAUAUGGAAGAGCCCUAAUGUGUAAAAUUAAUUUUAGUAGUGCUAUCCCCAUGUGAUUUUAAUAGCUUCUUAGGAGAAUGACAAAAAAAAAAAAAAAAAAAAAAAAAAAAAAAAA	AACACACCUAUUCAAGGAUUCA
NC_045512.2	176	184	176	181	2.38	hsa-miR-98-5p_MIMAT0000096	7	16	11	16	0.35	-2.65	-5.38	-0.310859	AUAGCUUCU&AGUAAGUUGU	(((((((((&)).)))))))	CAAUCUUUAAUCAGUGUGUAACAUUAGGGAGGACUUGAAAGAGCCACCACAUUUUCACCGAGGCCACGCGGAGUACGAUCGAGUGUACAGUGAACAAUGCUAGGGAGAGCUGCCUAUAUGGAAGAGCCCUAAUGUGUAAAAUUAAUUUUAGUAGUGCUAUCCCCAUGUGAUUUUAAUAGCUUCUUAGGAGAAUGACAAAAAAAAAAAAAAAAAAAAAAAAAAAAAAAAA	UGAGGUAGUAAGUUGUAUUGUU
NC_045512.2	186	191	186	191	2.54	hsa-miR-1252-3p_MIMAT0026744	14	19	14	19	0.27	-2.64	-5.45	-0.309686	AGGAGA&UUUCCU	((((((&))))))	CAAUCUUUAAUCAGUGUGUAACAUUAGGGAGGACUUGAAAGAGCCACCACAUUUUCACCGAGGCCACGCGGAGUACGAUCGAGUGUACAGUGAACAAUGCUAGGGAGAGCUGCCUAUAUGGAAGAGCCCUAAUGUGUAAAAUUAAUUUUAGUAGUGCUAUCCCCAUGUGAUUUUAAUAGCUUCUUAGGAGAAUGACAAAAAAAAAAAAAAAAAAAAAAAAAAAAAAAAA	CAAAUGAGCUUAAUUUCCUUUU
NC_045512.2	165	171	165	170	2.21	hsa-miR-144-5p_MIMAT0004600	8	14	9	14	0.39	-2.64	-5.24	-0.309686	AUGUGAU&AUCAUAU	(((((((&)))))))	CAAUCUUUAAUCAGUGUGUAACAUUAGGGAGGACUUGAAAGAGCCACCACAUUUUCACCGAGGCCACGCGGAGUACGAUCGAGUGUACAGUGAACAAUGCUAGGGAGAGCUGCCUAUAUGGAAGAGCCCUAAUGUGUAAAAUUAAUUUUAGUAGUGCUAUCCCCAUGUGAUUUUAAUAGCUUCUUAGGAGAAUGACAAAAAAAAAAAAAAAAAAAAAAAAAAAAAAAAA	GGAUAUCAUCAUAUACUGUAAG
NC_045512.2	68	80	75	80	3.42	hsa-miR-219a-5p_MIMAT0000276	2	15	2	7	2.87	-2.64	-8.93	-0.311385	GCGGAGUACGAUC&GAUUGUCCAAACGC	(((....((((((&)))))).....)))	CAAUCUUUAAUCAGUGUGUAACAUUAGGGAGGACUUGAAAGAGCCACCACAUUUUCACCGAGGCCACGCGGAGUACGAUCGAGUGUACAGUGAACAAUGCUAGGGAGAGCUGCCUAUAUGGAAGAGCCCUAAUGUGUAAAAUUAAUUUUAGUAGUGCUAUCCCCAUGUGAUUUUAAUAGCUUCUUAGGAGAAUGACAAAAAAAAAAAAAAAAAAAAAAAAAAAAAAAAA	UGAUUGUCCAAACGCAAUUCU
NC_045512.2	180	185	180	185	2.25	hsa-miR-3173-3p_MIMAT0015048	2	7	2	7	0.21	-2.64	-5.1	-0.309686	CUUCUU&AAGGAG	((((((&))))))	CAAUCUUUAAUCAGUGUGUAACAUUAGGGAGGACUUGAAAGAGCCACCACAUUUUCACCGAGGCCACGCGGAGUACGAUCGAGUGUACAGUGAACAAUGCUAGGGAGAGCUGCCUAUAUGGAAGAGCCCUAAUGUGUAAAAUUAAUUUUAGUAGUGCUAUCCCCAUGUGAUUUUAAUAGCUUCUUAGGAGAAUGACAAAAAAAAAAAAAAAAAAAAAAAAAAAAAAAAA	AAAGGAGGAAAUAGGCAGGCCA
NC_045512.2	116	124	119	124	3.74	hsa-miR-376c-5p_MIMAT0022861	12	20	12	17	2.73	-2.64	-9.11	-0.311385	AUAUGGAAG&CUUCUAUGU	(((((((((&)))))))))	CAAUCUUUAAUCAGUGUGUAACAUUAGGGAGGACUUGAAAGAGCCACCACAUUUUCACCGAGGCCACGCGGAGUACGAUCGAGUGUACAGUGAACAAUGCUAGGGAGAGCUGCCUAUAUGGAAGAGCCCUAAUGUGUAAAAUUAAUUUUAGUAGUGCUAUCCCCAUGUGAUUUUAAUAGCUUCUUAGGAGAAUGACAAAAAAAAAAAAAAAAAAAAAAAAAAAAAAAAA	GGUGGAUAUUCCUUCUAUGUU
NC_045512.2	20	26	21	26	0.7	hsa-miR-499a-5p_MIMAT0002870	14	20	14	19	0.92	-2.64	-4.26	-0.311385	AACAUUA&UGAUGUU	(((((((&)))))))	CAAUCUUUAAUCAGUGUGUAACAUUAGGGAGGACUUGAAAGAGCCACCACAUUUUCACCGAGGCCACGCGGAGUACGAUCGAGUGUACAGUGAACAAUGCUAGGGAGAGCUGCCUAUAUGGAAGAGCCCUAAUGUGUAAAAUUAAUUUUAGUAGUGCUAUCCCCAUGUGAUUUUAAUAGCUUCUUAGGAGAAUGACAAAAAAAAAAAAAAAAAAAAAAAAAAAAAAAAA	UUAAGACUUGCAGUGAUGUUU
NC_045512.2	118	124	119	124	3.07	hsa-miR-99a-3p_MIMAT0004511	9	15	9	14	0.48	-2.64	-6.19	-0.309686	AUGGAAG&CUUCUAU	(((((((&)))))))	CAAUCUUUAAUCAGUGUGUAACAUUAGGGAGGACUUGAAAGAGCCACCACAUUUUCACCGAGGCCACGCGGAGUACGAUCGAGUGUACAGUGAACAAUGCUAGGGAGAGCUGCCUAUAUGGAAGAGCCCUAAUGUGUAAAAUUAAUUUUAGUAGUGCUAUCCCCAUGUGAUUUUAAUAGCUUCUUAGGAGAAUGACAAAAAAAAAAAAAAAAAAAAAAAAAAAAAAAAA	CAAGCUCGCUUCUAUGGGUCUG
NC_045512.2	195	200	195	200	0.47	hsa-miR-548g-3p_MIMAT0005912	15	20	15	20	0.62	-2.63	-3.72	-0.308513	ACAAAA&UUUUGU	((((((&))))))	CAAUCUUUAAUCAGUGUGUAACAUUAGGGAGGACUUGAAAGAGCCACCACAUUUUCACCGAGGCCACGCGGAGUACGAUCGAGUGUACAGUGAACAAUGCUAGGGAGAGCUGCCUAUAUGGAAGAGCCCUAAUGUGUAAAAUUAAUUUUAGUAGUGCUAUCCCCAUGUGAUUUUAAUAGCUUCUUAGGAGAAUGACAAAAAAAAAAAAAAAAAAAAAAAAAAAAAAAAA	AAAACUGUAAUUACUUUUGUAC
NC_045512.2	151	158	153	158	2.37	hsa-miR-103a-1-5p_MIMAT0037306	12	19	12	17	4.32	-2.62	-9.31	-0.305746	GUAGUGCU&AGUGCUGC	((((((((&))))))))	CAAUCUUUAAUCAGUGUGUAACAUUAGGGAGGACUUGAAAGAGCCACCACAUUUUCACCGAGGCCACGCGGAGUACGAUCGAGUGUACAGUGAACAAUGCUAGGGAGAGCUGCCUAUAUGGAAGAGCCCUAAUGUGUAAAAUUAAUUUUAGUAGUGCUAUCCCCAUGUGAUUUUAAUAGCUUCUUAGGAGAAUGACAAAAAAAAAAAAAAAAAAAAAAAAAAAAAAAAA	GGCUUCUUUACAGUGCUGCCUUG
NC_045512.2	154	162	154	159	2.87	hsa-miR-3157-5p_MIMAT0015031	9	17	12	17	2.89	-2.62	-8.38	-0.30734	GUGCUAUCC&GGCUAGUGC	((((((.((&)).))))))	CAAUCUUUAAUCAGUGUGUAACAUUAGGGAGGACUUGAAAGAGCCACCACAUUUUCACCGAGGCCACGCGGAGUACGAUCGAGUGUACAGUGAACAAUGCUAGGGAGAGCUGCCUAUAUGGAAGAGCCCUAAUGUGUAAAAUUAAUUUUAGUAGUGCUAUCCCCAUGUGAUUUUAAUAGCUUCUUAGGAGAAUGACAAAAAAAAAAAAAAAAAAAAAAAAAAAAAAAAA	UUCAGCCAGGCUAGUGCAGUCU
NC_045512.2	180	195	180	185	5.06	hsa-miR-452-3p_MIMAT0001636	2	16	11	16	1.78	-2.62	-9.46	-0.30734	CUUCUUAGGAGAAUGA&UCAUCUGCAAAGAAG	((((((...((.((((&))))))...))))))	CAAUCUUUAAUCAGUGUGUAACAUUAGGGAGGACUUGAAAGAGCCACCACAUUUUCACCGAGGCCACGCGGAGUACGAUCGAGUGUACAGUGAACAAUGCUAGGGAGAGCUGCCUAUAUGGAAGAGCCCUAAUGUGUAAAAUUAAUUUUAGUAGUGCUAUCCCCAUGUGAUUUUAAUAGCUUCUUAGGAGAAUGACAAAAAAAAAAAAAAAAAAAAAAAAAAAAAAAAA	CUCAUCUGCAAAGAAGUAAGUG
NC_045512.2	186	197	186	191	3.26	hsa-miR-494-5p_MIMAT0026607	5	21	16	21	0.99	-2.62	-6.87	-0.305746	AGGAGAAUGACA&UGUCCGUGUUGUCUUCU	((((((..((((&)))).......))))))	CAAUCUUUAAUCAGUGUGUAACAUUAGGGAGGACUUGAAAGAGCCACCACAUUUUCACCGAGGCCACGCGGAGUACGAUCGAGUGUACAGUGAACAAUGCUAGGGAGAGCUGCCUAUAUGGAAGAGCCCUAAUGUGUAAAAUUAAUUUUAGUAGUGCUAUCCCCAUGUGAUUUUAAUAGCUUCUUAGGAGAAUGACAAAAAAAAAAAAAAAAAAAAAAAAAAAAAAAAA	AGGUUGUCCGUGUUGUCUUCUCU
NC_045512.2	88	112	107	112	8.4	hsa-miR-5000-5p_MIMAT0021019	1	19	1	6	3.77	-2.62	-14.79	-0.30734	CAGUGAACAAUGCUAGGGAGAGCUG&CAGUUCAGAAGUGUUCCUG	(((.(((((...((.....((((((&))))))))...))))))))	CAAUCUUUAAUCAGUGUGUAACAUUAGGGAGGACUUGAAAGAGCCACCACAUUUUCACCGAGGCCACGCGGAGUACGAUCGAGUGUACAGUGAACAAUGCUAGGGAGAGCUGCCUAUAUGGAAGAGCCCUAAUGUGUAAAAUUAAUUUUAGUAGUGCUAUCCCCAUGUGAUUUUAAUAGCUUCUUAGGAGAAUGACAAAAAAAAAAAAAAAAAAAAAAAAAAAAAAAAA	CAGUUCAGAAGUGUUCCUGAGU
NC_045512.2	179	184	179	184	1.04	hsa-miR-365b-5p_MIMAT0022833	11	16	11	16	1.69	-2.59	-5.32	-0.303821	GCUUCU&AGGGGC	((((((&))))))	CAAUCUUUAAUCAGUGUGUAACAUUAGGGAGGACUUGAAAGAGCCACCACAUUUUCACCGAGGCCACGCGGAGUACGAUCGAGUGUACAGUGAACAAUGCUAGGGAGAGCUGCCUAUAUGGAAGAGCCCUAAUGUGUAAAAUUAAUUUUAGUAGUGCUAUCCCCAUGUGAUUUUAAUAGCUUCUUAGGAGAAUGACAAAAAAAAAAAAAAAAAAAAAAAAAAAAAAAAA	AGGGACUUUCAGGGGCAGCUGU
NC_045512.2	135	158	139	144	3.37	hsa-miR-15b-5p_MIMAT0000417	2	22	14	19	0.67	-2.58	-6.62	-0.302648	UGUAAAAUUAAUUUUAGUAGUGCU&AGCAGCACAUCAUGGUUUACA	(((.((((((......((..((((&))))..))....)))))))))	CAAUCUUUAAUCAGUGUGUAACAUUAGGGAGGACUUGAAAGAGCCACCACAUUUUCACCGAGGCCACGCGGAGUACGAUCGAGUGUACAGUGAACAAUGCUAGGGAGAGCUGCCUAUAUGGAAGAGCCCUAAUGUGUAAAAUUAAUUUUAGUAGUGCUAUCCCCAUGUGAUUUUAAUAGCUUCUUAGGAGAAUGACAAAAAAAAAAAAAAAAAAAAAAAAAAAAAAAAA	UAGCAGCACAUCAUGGUUUACA
NC_045512.2	182	187	182	187	2.93	hsa-miR-510-3p_MIMAT0026613	11	16	11	16	0.94	-2.58	-6.45	-0.304308	UCUUAG&CUAAGA	((((((&))))))	CAAUCUUUAAUCAGUGUGUAACAUUAGGGAGGACUUGAAAGAGCCACCACAUUUUCACCGAGGCCACGCGGAGUACGAUCGAGUGUACAGUGAACAAUGCUAGGGAGAGCUGCCUAUAUGGAAGAGCCCUAAUGUGUAAAAUUAAUUUUAGUAGUGCUAUCCCCAUGUGAUUUUAAUAGCUUCUUAGGAGAAUGACAAAAAAAAAAAAAAAAAAAAAAAAAAAAAAAAA	AUUGAAACCUCUAAGAGUGGA
NC_045512.2	186	191	186	191	2.54	hsa-miR-128-3p_MIMAT0000424	15	20	15	20	0.24	-2.57	-5.35	-0.303129	AGGAGA&UCUCUU	((((((&))))))	CAAUCUUUAAUCAGUGUGUAACAUUAGGGAGGACUUGAAAGAGCCACCACAUUUUCACCGAGGCCACGCGGAGUACGAUCGAGUGUACAGUGAACAAUGCUAGGGAGAGCUGCCUAUAUGGAAGAGCCCUAAUGUGUAAAAUUAAUUUUAGUAGUGCUAUCCCCAUGUGAUUUUAAUAGCUUCUUAGGAGAAUGACAAAAAAAAAAAAAAAAAAAAAAAAAAAAAAAAA	UCACAGUGAACCGGUCUCUUU
NC_045512.2	20	26	21	26	0.7	hsa-miR-142-3p_MIMAT0000434	3	9	3	8	0.58	-2.57	-3.85	-0.299911	AACAUUA&UAGUGUU	(((((((&)))))))	CAAUCUUUAAUCAGUGUGUAACAUUAGGGAGGACUUGAAAGAGCCACCACAUUUUCACCGAGGCCACGCGGAGUACGAUCGAGUGUACAGUGAACAAUGCUAGGGAGAGCUGCCUAUAUGGAAGAGCCCUAAUGUGUAAAAUUAAUUUUAGUAGUGCUAUCCCCAUGUGAUUUUAAUAGCUUCUUAGGAGAAUGACAAAAAAAAAAAAAAAAAAAAAAAAAAAAAAAAA	UGUAGUGUUUCCUACUUUAUGGA
NC_045512.2	141	153	148	153	1.69	hsa-miR-155-5p_MIMAT0000646	5	17	5	10	1.41	-2.57	-5.67	-0.298429	AUUAAUUUUAGUA&UGCUAAUCGUGAU	((((...((((((&))))))...))))	CAAUCUUUAAUCAGUGUGUAACAUUAGGGAGGACUUGAAAGAGCCACCACAUUUUCACCGAGGCCACGCGGAGUACGAUCGAGUGUACAGUGAACAAUGCUAGGGAGAGCUGCCUAUAUGGAAGAGCCCUAAUGUGUAAAAUUAAUUUUAGUAGUGCUAUCCCCAUGUGAUUUUAAUAGCUUCUUAGGAGAAUGACAAAAAAAAAAAAAAAAAAAAAAAAAAAAAAAAA	UUAAUGCUAAUCGUGAUAGGGGUU
NC_045512.2	38	44	39	44	1.52	hsa-miR-208b-5p_MIMAT0026722	3	9	3	8	2.16	-2.57	-6.25	-0.301475	AAAGAGC&GCUUUUU	(((((((&)))))))	CAAUCUUUAAUCAGUGUGUAACAUUAGGGAGGACUUGAAAGAGCCACCACAUUUUCACCGAGGCCACGCGGAGUACGAUCGAGUGUACAGUGAACAAUGCUAGGGAGAGCUGCCUAUAUGGAAGAGCCCUAAUGUGUAAAAUUAAUUUUAGUAGUGCUAUCCCCAUGUGAUUUUAAUAGCUUCUUAGGAGAAUGACAAAAAAAAAAAAAAAAAAAAAAAAAAAAAAAAA	AAGCUUUUUGCUCGAAUUAUGU
NC_045512.2	77	83	77	82	1.23	hsa-miR-488-3p_MIMAT0004763	15	21	16	21	2.87	-2.57	-6.67	-0.303129	GAUCGAG&CUUGGUC	(((((((&)))))))	CAAUCUUUAAUCAGUGUGUAACAUUAGGGAGGACUUGAAAGAGCCACCACAUUUUCACCGAGGCCACGCGGAGUACGAUCGAGUGUACAGUGAACAAUGCUAGGGAGAGCUGCCUAUAUGGAAGAGCCCUAAUGUGUAAAAUUAAUUUUAGUAGUGCUAUCCCCAUGUGAUUUUAAUAGCUUCUUAGGAGAAUGACAAAAAAAAAAAAAAAAAAAAAAAAAAAAAAAAA	UUGAAAGGCUAUUUCUUGGUC
NC_045512.2	10	20	10	15	2.06	hsa-miR-6720-3p_MIMAT0025851	7	19	14	19	3.39	-2.57	-8.02	-0.301475	AUCAGUGUGUA&UGCAGGAACUGGU	((((((.((((&))))...))))))	CAAUCUUUAAUCAGUGUGUAACAUUAGGGAGGACUUGAAAGAGCCACCACAUUUUCACCGAGGCCACGCGGAGUACGAUCGAGUGUACAGUGAACAAUGCUAGGGAGAGCUGCCUAUAUGGAAGAGCCCUAAUGUGUAAAAUUAAUUUUAGUAGUGCUAUCCCCAUGUGAUUUUAAUAGCUUCUUAGGAGAAUGACAAAAAAAAAAAAAAAAAAAAAAAAAAAAAAAAA	CGCGCCUGCAGGAACUGGUAGA
NC_045512.2	52	58	52	57	2.18	hsa-miR-1276_MIMAT0005930	12	18	13	18	0.87	-2.56	-5.61	-0.303697	UUUUCAC&GUGGAGA	(((((((&)))))))	CAAUCUUUAAUCAGUGUGUAACAUUAGGGAGGACUUGAAAGAGCCACCACAUUUUCACCGAGGCCACGCGGAGUACGAUCGAGUGUACAGUGAACAAUGCUAGGGAGAGCUGCCUAUAUGGAAGAGCCCUAAUGUGUAAAAUUAAUUUUAGUAGUGCUAUCCCCAUGUGAUUUUAAUAGCUUCUUAGGAGAAUGACAAAAAAAAAAAAAAAAAAAAAAAAAAAAAAAAA	UAAAGAGCCCUGUGGAGACA
NC_045512.2	75	82	75	80	2.66	hsa-miR-1307-3p_MIMAT0005951	14	21	16	21	5.24	-2.56	-10.46	-0.300302	ACGAUCGA&UCGGUCGU	((((((((&))))))))	CAAUCUUUAAUCAGUGUGUAACAUUAGGGAGGACUUGAAAGAGCCACCACAUUUUCACCGAGGCCACGCGGAGUACGAUCGAGUGUACAGUGAACAAUGCUAGGGAGAGCUGCCUAUAUGGAAGAGCCCUAAUGUGUAAAAUUAAUUUUAGUAGUGCUAUCCCCAUGUGAUUUUAAUAGCUUCUUAGGAGAAUGACAAAAAAAAAAAAAAAAAAAAAAAAAAAAAAAAA	ACUCGGCGUGGCGUCGGUCGUG
NC_045512.2	32	37	32	37	2.03	hsa-miR-499a-3p_MIMAT0004772	11	16	11	16	2.37	-2.56	-6.96	-0.300302	GACUUG&CAAGUC	((((((&))))))	CAAUCUUUAAUCAGUGUGUAACAUUAGGGAGGACUUGAAAGAGCCACCACAUUUUCACCGAGGCCACGCGGAGUACGAUCGAGUGUACAGUGAACAAUGCUAGGGAGAGCUGCCUAUAUGGAAGAGCCCUAAUGUGUAAAAUUAAUUUUAGUAGUGCUAUCCCCAUGUGAUUUUAAUAGCUUCUUAGGAGAAUGACAAAAAAAAAAAAAAAAAAAAAAAAAAAAAAAAA	AACAUCACAGCAAGUCUGUGCU
NC_045512.2	116	121	116	121	3.28	hsa-miR-5583-5p_MIMAT0022281	13	18	13	18	0.22	-2.56	-6.06	-0.300302	AUAUGG&CCAUAU	((((((&))))))	CAAUCUUUAAUCAGUGUGUAACAUUAGGGAGGACUUGAAAGAGCCACCACAUUUUCACCGAGGCCACGCGGAGUACGAUCGAGUGUACAGUGAACAAUGCUAGGGAGAGCUGCCUAUAUGGAAGAGCCCUAAUGUGUAAAAUUAAUUUUAGUAGUGCUAUCCCCAUGUGAUUUUAAUAGCUUCUUAGGAGAAUGACAAAAAAAAAAAAAAAAAAAAAAAAAAAAAAAAA	AAACUAAUAUACCCAUAUUCUG
NC_045512.2	78	94	89	94	3.51	hsa-miR-579-3p_MIMAT0003244	1	22	1	6	2.69	-2.56	-8.76	-0.298744	AUCGAGUGUACAGUGAA&UUCAUUUGGUAUAAACCGCGAU	((((..(((((((((((&))))))..))))).....))))	CAAUCUUUAAUCAGUGUGUAACAUUAGGGAGGACUUGAAAGAGCCACCACAUUUUCACCGAGGCCACGCGGAGUACGAUCGAGUGUACAGUGAACAAUGCUAGGGAGAGCUGCCUAUAUGGAAGAGCCCUAAUGUGUAAAAUUAAUUUUAGUAGUGCUAUCCCCAUGUGAUUUUAAUAGCUUCUUAGGAGAAUGACAAAAAAAAAAAAAAAAAAAAAAAAAAAAAAAAA	UUCAUUUGGUAUAAACCGCGAUU
NC_045512.2	62	75	70	75	4.17	hsa-miR-1-5p_MIMAT0031892	4	19	4	9	0.57	-2.54	-7.28	-0.297955	GGCCACGCGGAGUA&UACUUCUUUAUAUGCC	(((.....((((((&)))))).......)))	CAAUCUUUAAUCAGUGUGUAACAUUAGGGAGGACUUGAAAGAGCCACCACAUUUUCACCGAGGCCACGCGGAGUACGAUCGAGUGUACAGUGAACAAUGCUAGGGAGAGCUGCCUAUAUGGAAGAGCCCUAAUGUGUAAAAUUAAUUUUAGUAGUGCUAUCCCCAUGUGAUUUUAAUAGCUUCUUAGGAGAAUGACAAAAAAAAAAAAAAAAAAAAAAAAAAAAAAAAA	ACAUACUUCUUUAUAUGCCCAU
NC_045512.2	178	183	178	183	1.98	hsa-miR-329-5p_MIMAT0026555	1	6	1	6	0.42	-2.54	-4.94	-0.29641	AGCUUC&GAGGUU	((((((&))))))	CAAUCUUUAAUCAGUGUGUAACAUUAGGGAGGACUUGAAAGAGCCACCACAUUUUCACCGAGGCCACGCGGAGUACGAUCGAGUGUACAGUGAACAAUGCUAGGGAGAGCUGCCUAUAUGGAAGAGCCCUAAUGUGUAAAAUUAAUUUUAGUAGUGCUAUCCCCAUGUGAUUUUAAUAGCUUCUUAGGAGAAUGACAAAAAAAAAAAAAAAAAAAAAAAAAAAAAAAAA	GAGGUUUUCUGGGUUUCUGUUUC
NC_045512.2	68	74	68	73	3.22	hsa-miR-409-5p_MIMAT0001638	15	21	16	21	1.97	-2.54	-7.73	-0.29641	GCGGAGU&ACUUUGC	(((((((&)))))))	CAAUCUUUAAUCAGUGUGUAACAUUAGGGAGGACUUGAAAGAGCCACCACAUUUUCACCGAGGCCACGCGGAGUACGAUCGAGUGUACAGUGAACAAUGCUAGGGAGAGCUGCCUAUAUGGAAGAGCCCUAAUGUGUAAAAUUAAUUUUAGUAGUGCUAUCCCCAUGUGAUUUUAAUAGCUUCUUAGGAGAAUGACAAAAAAAAAAAAAAAAAAAAAAAAAAAAAAAAA	AGGUUACCCGAGCAACUUUGCAU
NC_045512.2	87	92	87	92	1.99	hsa-miR-889-3p_MIMAT0004921	16	21	16	21	0.87	-2.54	-5.4	-0.29959	ACAGUG&CAUUGU	((((((&))))))	CAAUCUUUAAUCAGUGUGUAACAUUAGGGAGGACUUGAAAGAGCCACCACAUUUUCACCGAGGCCACGCGGAGUACGAUCGAGUGUACAGUGAACAAUGCUAGGGAGAGCUGCCUAUAUGGAAGAGCCCUAAUGUGUAAAAUUAAUUUUAGUAGUGCUAUCCCCAUGUGAUUUUAAUAGCUUCUUAGGAGAAUGACAAAAAAAAAAAAAAAAAAAAAAAAAAAAAAAAA	UUAAUAUCGGACAACCAUUGU
NC_045512.2	153	158	153	158	2.25	hsa-miR-302a-3p_MIMAT0000684	3	8	3	8	0.23	-2.53	-5.01	-0.295243	AGUGCU&AGUGCU	((((((&))))))	CAAUCUUUAAUCAGUGUGUAACAUUAGGGAGGACUUGAAAGAGCCACCACAUUUUCACCGAGGCCACGCGGAGUACGAUCGAGUGUACAGUGAACAAUGCUAGGGAGAGCUGCCUAUAUGGAAGAGCCCUAAUGUGUAAAAUUAAUUUUAGUAGUGCUAUCCCCAUGUGAUUUUAAUAGCUUCUUAGGAGAAUGACAAAAAAAAAAAAAAAAAAAAAAAAAAAAAAAAA	UAAGUGCUUCCAUGUUUUGGUGA
NC_045512.2	99	104	99	104	3.92	hsa-miR-127-3p_MIMAT0000446	16	21	16	21	0.21	-2.52	-6.65	-0.295609	GCUAGG&CUUGGC	((((((&))))))	CAAUCUUUAAUCAGUGUGUAACAUUAGGGAGGACUUGAAAGAGCCACCACAUUUUCACCGAGGCCACGCGGAGUACGAUCGAGUGUACAGUGAACAAUGCUAGGGAGAGCUGCCUAUAUGGAAGAGCCCUAAUGUGUAAAAUUAAUUUUAGUAGUGCUAUCCCCAUGUGAUUUUAAUAGCUUCUUAGGAGAAUGACAAAAAAAAAAAAAAAAAAAAAAAAAAAAAAAAA	UCGGAUCCGUCUGAGCUUGGCU
NC_045512.2	23	32	23	28	4.18	hsa-miR-134-3p_MIMAT0026481	9	17	12	17	1.46	-2.52	-8.16	-0.294076	AUUAGGGAGG&CCACCUAGU	((((((..((&)).))))))	CAAUCUUUAAUCAGUGUGUAACAUUAGGGAGGACUUGAAAGAGCCACCACAUUUUCACCGAGGCCACGCGGAGUACGAUCGAGUGUACAGUGAACAAUGCUAGGGAGAGCUGCCUAUAUGGAAGAGCCCUAAUGUGUAAAAUUAAUUUUAGUAGUGCUAUCCCCAUGUGAUUUUAAUAGCUUCUUAGGAGAAUGACAAAAAAAAAAAAAAAAAAAAAAAAAAAAAAAAA	CCUGUGGGCCACCUAGUCACCAA
NC_045512.2	180	188	183	188	3.05	hsa-miR-502-3p_MIMAT0004775	7	16	7	12	2.66	-2.52	-8.23	-0.295609	CUUCUUAGG&CCUGGGCAAG	(((((((((&)))))).)))	CAAUCUUUAAUCAGUGUGUAACAUUAGGGAGGACUUGAAAGAGCCACCACAUUUUCACCGAGGCCACGCGGAGUACGAUCGAGUGUACAGUGAACAAUGCUAGGGAGAGCUGCCUAUAUGGAAGAGCCCUAAUGUGUAAAAUUAAUUUUAGUAGUGCUAUCCCCAUGUGAUUUUAAUAGCUUCUUAGGAGAAUGACAAAAAAAAAAAAAAAAAAAAAAAAAAAAAAAAA	AAUGCACCUGGGCAAGGAUUCA
NC_045512.2	111	116	111	116	3.41	hsa-miR-541-3p_MIMAT0004920	4	9	4	9	1.31	-2.52	-7.24	-0.295609	UGCCUA&UGGGCA	((((((&))))))	CAAUCUUUAAUCAGUGUGUAACAUUAGGGAGGACUUGAAAGAGCCACCACAUUUUCACCGAGGCCACGCGGAGUACGAUCGAGUGUACAGUGAACAAUGCUAGGGAGAGCUGCCUAUAUGGAAGAGCCCUAAUGUGUAAAAUUAAUUUUAGUAGUGCUAUCCCCAUGUGAUUUUAAUAGCUUCUUAGGAGAAUGACAAAAAAAAAAAAAAAAAAAAAAAAAAAAAAAAA	UGGUGGGCACAGAAUCUGGACU
NC_045512.2	180	188	183	188	3.05	hsa-miR-500a-3p_MIMAT0002871	6	15	6	11	2.64	-2.51	-8.2	-0.294436	CUUCUUAGG&CCUGGGCAAG	(((((((((&)))))).)))	CAAUCUUUAAUCAGUGUGUAACAUUAGGGAGGACUUGAAAGAGCCACCACAUUUUCACCGAGGCCACGCGGAGUACGAUCGAGUGUACAGUGAACAAUGCUAGGGAGAGCUGCCUAUAUGGAAGAGCCCUAAUGUGUAAAAUUAAUUUUAGUAGUGCUAUCCCCAUGUGAUUUUAAUAGCUUCUUAGGAGAAUGACAAAAAAAAAAAAAAAAAAAAAAAAAAAAAAAAA	AUGCACCUGGGCAAGGAUUCUG
NC_045512.2	167	172	167	172	2.13	hsa-miR-510-5p_MIMAT0002882	17	22	17	22	0	-2.51	-4.64	-0.294436	GUGAUU&AAUCAC	((((((&))))))	CAAUCUUUAAUCAGUGUGUAACAUUAGGGAGGACUUGAAAGAGCCACCACAUUUUCACCGAGGCCACGCGGAGUACGAUCGAGUGUACAGUGAACAAUGCUAGGGAGAGCUGCCUAUAUGGAAGAGCCCUAAUGUGUAAAAUUAAUUUUAGUAGUGCUAUCCCCAUGUGAUUUUAAUAGCUUCUUAGGAGAAUGACAAAAAAAAAAAAAAAAAAAAAAAAAAAAAAAAA	UACUCAGGAGAGUGGCAAUCAC
NC_045512.2	9	18	13	18	2.11	hsa-miR-551b-3p_MIMAT0003233	7	17	7	12	3.11	-2.51	-7.73	-0.296052	AAUCAGUGUG&CAUACUUGGUU	((((((((((&)))))).))))	CAAUCUUUAAUCAGUGUGUAACAUUAGGGAGGACUUGAAAGAGCCACCACAUUUUCACCGAGGCCACGCGGAGUACGAUCGAGUGUACAGUGAACAAUGCUAGGGAGAGCUGCCUAUAUGGAAGAGCCCUAAUGUGUAAAAUUAAUUUUAGUAGUGCUAUCCCCAUGUGAUUUUAAUAGCUUCUUAGGAGAAUGACAAAAAAAAAAAAAAAAAAAAAAAAAAAAAAAAA	GCGACCCAUACUUGGUUUCAG
NC_045512.2	69	75	69	74	3.17	hsa-miR-514a-5p_MIMAT0022702	1	7	2	7	2.87	-2.5	-8.54	-0.291742	CGGAGUA&UACUCUG	(((((((&)))))))	CAAUCUUUAAUCAGUGUGUAACAUUAGGGAGGACUUGAAAGAGCCACCACAUUUUCACCGAGGCCACGCGGAGUACGAUCGAGUGUACAGUGAACAAUGCUAGGGAGAGCUGCCUAUAUGGAAGAGCCCUAAUGUGUAAAAUUAAUUUUAGUAGUGCUAUCCCCAUGUGAUUUUAAUAGCUUCUUAGGAGAAUGACAAAAAAAAAAAAAAAAAAAAAAAAAAAAAAAAA	UACUCUGGAGAGUGACAAUCAUG
NC_045512.2	193	198	193	198	0.58	hsa-miR-5586-5p_MIMAT0022287	9	14	9	14	0.72	-2.48	-3.78	-0.290917	UGACAA&UUGUUA	((((((&))))))	CAAUCUUUAAUCAGUGUGUAACAUUAGGGAGGACUUGAAAGAGCCACCACAUUUUCACCGAGGCCACGCGGAGUACGAUCGAGUGUACAGUGAACAAUGCUAGGGAGAGCUGCCUAUAUGGAAGAGCCCUAAUGUGUAAAAUUAAUUUUAGUAGUGCUAUCCCCAUGUGAUUUUAAUAGCUUCUUAGGAGAAUGACAAAAAAAAAAAAAAAAAAAAAAAAAAAAAAAAA	UAUCCAGCUUGUUACUAUAUGC
NC_045512.2	130	137	130	135	2.26	hsa-miR-196a-1-3p_MIMAT0037307	3	11	6	11	0	-2.47	-4.73	-0.291334	UAAUGUGU&ACAACAUUA	((((((((&)).))))))	CAAUCUUUAAUCAGUGUGUAACAUUAGGGAGGACUUGAAAGAGCCACCACAUUUUCACCGAGGCCACGCGGAGUACGAUCGAGUGUACAGUGAACAAUGCUAGGGAGAGCUGCCUAUAUGGAAGAGCCCUAAUGUGUAAAAUUAAUUUUAGUAGUGCUAUCCCCAUGUGAUUUUAAUAGCUUCUUAGGAGAAUGACAAAAAAAAAAAAAAAAAAAAAAAAAAAAAAAAA	CAACAACAUUAAACCACCCGA
NC_045512.2	178	192	187	192	4.99	hsa-miR-22-5p_MIMAT0004495	3	19	3	8	0.75	-2.47	-8.21	-0.289744	AGCUUCUUAGGAGAA&UUCUUCAGUGGCAAGCU	(((((....((((((&))))))......)))))	CAAUCUUUAAUCAGUGUGUAACAUUAGGGAGGACUUGAAAGAGCCACCACAUUUUCACCGAGGCCACGCGGAGUACGAUCGAGUGUACAGUGAACAAUGCUAGGGAGAGCUGCCUAUAUGGAAGAGCCCUAAUGUGUAAAAUUAAUUUUAGUAGUGCUAUCCCCAUGUGAUUUUAAUAGCUUCUUAGGAGAAUGACAAAAAAAAAAAAAAAAAAAAAAAAAAAAAAAAA	AGUUCUUCAGUGGCAAGCUUUA
NC_045512.2	180	185	180	185	2.25	hsa-miR-7111-5p_MIMAT0028119	7	12	7	12	0.56	-2.47	-5.28	-0.289744	CUUCUU&AGGAAG	((((((&))))))	CAAUCUUUAAUCAGUGUGUAACAUUAGGGAGGACUUGAAAGAGCCACCACAUUUUCACCGAGGCCACGCGGAGUACGAUCGAGUGUACAGUGAACAAUGCUAGGGAGAGCUGCCUAUAUGGAAGAGCCCUAAUGUGUAAAAUUAAUUUUAGUAGUGCUAUCCCCAUGUGAUUUUAAUAGCUUCUUAGGAGAAUGACAAAAAAAAAAAAAAAAAAAAAAAAAAAAAAAAA	UGGGGGAGGAAGGACAGGCCAU
NC_045512.2	110	115	110	115	2.5	hsa-miR-93-5p_MIMAT0000093	18	23	18	23	1.62	-2.46	-6.58	-0.287074	CUGCCU&AGGUAG	((((((&))))))	CAAUCUUUAAUCAGUGUGUAACAUUAGGGAGGACUUGAAAGAGCCACCACAUUUUCACCGAGGCCACGCGGAGUACGAUCGAGUGUACAGUGAACAAUGCUAGGGAGAGCUGCCUAUAUGGAAGAGCCCUAAUGUGUAAAAUUAAUUUUAGUAGUGCUAUCCCCAUGUGAUUUUAAUAGCUUCUUAGGAGAAUGACAAAAAAAAAAAAAAAAAAAAAAAAAAAAAAAAA	CAAAGUGCUGUUCGUGCAGGUAG
NC_045512.2	4	12	7	12	1.22	hsa-miR-320a-3p_MIMAT0000510	9	16	9	14	0.11	-2.45	-3.78	-0.287398	UCUUUAAUC&GGUUGAGA	((.((((((&))))))))	CAAUCUUUAAUCAGUGUGUAACAUUAGGGAGGACUUGAAAGAGCCACCACAUUUUCACCGAGGCCACGCGGAGUACGAUCGAGUGUACAGUGAACAAUGCUAGGGAGAGCUGCCUAUAUGGAAGAGCCCUAAUGUGUAAAAUUAAUUUUAGUAGUGCUAUCCCCAUGUGAUUUUAAUAGCUUCUUAGGAGAAUGACAAAAAAAAAAAAAAAAAAAAAAAAAAAAAAAAA	AAAAGCUGGGUUGAGAGGGCGA
[truncated: 267 more rows]

## Sheet: RNA22 3UTR high confidence
miR Name	transcript name	leftmost position of	folding energy	heteroduplex	p value
		predicted target site	(in -Kcal/mol)
hsa_miR_124_5p_MIMAT0004591	NC_045512.2 3UTR	60	-13.3	ACCGAGGCCACGC--GGAGTACG	0.224
				|:||| | ||| ||::||
[truncated: 169 more rows]

## Sheet: RNAhybrid 3UTR high confidence
Version: RNAhybrid 2.2
[truncated: 117,512 more rows]

## Sheet: STarMir 3UTR high confidence
miRNA	Site_Position	Hybrid Conformation	LogitProb†	Score	Seed_Position	Seed_Type*	3′_bp*	ΔGhybrid	ΔGnucl*	ΔGtotal*	Site_Access*	Seed_Access*	Upstream_Access (15nt)*	Dwstream_Access (10nt)*	Upstream_AU (30nt)*	Dwstream_AU (30nt)*	Site_Location*
[truncated: 6,126 more rows]

[truncated: 1 more sheets: List of high confidence]
