# Supplementary material for: In Silico and In Vitro Analyses Validate Human MicroRNAs Targeting the SARS-CoV-2 3′-UTR
Source: Int J Mol Sci. 2021 Jun 5;22(11):6094. doi: 10.3390/ijms22116094 (PMC8201247; doi:10.3390/ijms22116094)
Supplement: Supplementary file 1 [file ijms-22-06094-s001.zip › Table S3.pdf]

**Table S3.** Sequences from SARS-CoV-2 variants and related virus employed in the sequence comparisons. 60 sequences comprising all clades recognized in GISAID, sampled in 32 countries from November 2019 to February 2021. Only sequences comprising the 196 nt of the 3'-UTR have been considered. Clades correspond to those recognized in GISAID. Variant indicates the GISAID Pangolin Lineages (PL) or the variant of each sequence (\* indicates the South African variant, \*\* the British variant, \*\*\* the Brazilian variant, and \*\*\*\* the Californian variant). ID indicates accession ID of GenBank (first 6 sequences) or GISAID (EPI\_ ...). Collect date indicates the date of collection. Identity (%) expresses the % of sequence identity relative to the reference sequence (NC\_045512.2) according to CLUSTALW online tool (<https://www.genome.jp/tools-bin/clustalw>). Reference includes the article where the sequence is published or, when unpublished, information on the responsible for the collection, analysis, and submission of the sequences. No data on the sequence is published in agreement with the terms and conditions of use of GISAID.

| Clade | Variant          | ID             | Origin                | Collect Date | Identity (%)              | Reference                                                                                                           |
|-------|------------------|----------------|-----------------------|--------------|---------------------------|---------------------------------------------------------------------------------------------------------------------|
|       | Reference Genome | NC_045512.2    | Wuhan (China)         | 2019-11      | REF                       | Wu <i>et al.</i> , 2020                                                                                             |
|       | Original         | LC546038.1     | Japan                 | 2020-03      | 100%                      | <a href="https://www.ncbi.nlm.nih.gov/nucleotide/LC546038.1">https://www.ncbi.nlm.nih.gov/nucleotide/LC546038.1</a> |
|       | D614G mutation   | MT192773.1     | Ho Chi Minh (Vietnam) | 2020-01      | 100%                      | <a href="https://www.ncbi.nlm.nih.gov/nucleotide/MT192773.1">https://www.ncbi.nlm.nih.gov/nucleotide/MT192773.1</a> |
|       | Original         | MT192759.1     | Taiwan                | 2020-01      | 100%                      | <a href="https://www.ncbi.nlm.nih.gov/nucleotide/MT192759">https://www.ncbi.nlm.nih.gov/nucleotide/MT192759</a>     |
|       | Unknown          | MT114415       | Hong Kong (China)     | 2020-01      | 99%<br>nt 29742<br>G->U   | The University of Hong Kong   To KKW and Yuen K-Y                                                                   |
|       | Unknown          | MT370518.1     | Taiwan                | 2020-02      | 99%<br>nt 29742<br>G->U   | Department of Laboratory Medicine, Lin-Kou Chang-Gung Memorial Hospital   K-C Tsao, Y-N Gong <i>et al.</i>          |
| GH    | PL B.1.2         | EPI_ISL_812206 | Tennessee (USA)       | 2020-11      | 100%                      | TN Division of Laboratory Services   Centers for Disease Control and Prevention   Y Li, Y Tao <i>et al.</i>         |
| GH    | PL B.1.247       | EPI_ISL_490001 | Saudi Arabia          | 2020-02      | 100%                      | King Fahad Medical City   Alosaimi,B., Naeem,A., Alghoraibi,M., Enani,M.                                            |
| GH    | PL B.1.36.18     | EPI_ISL_853274 | Toronto (Canada)      | 2020-12      | 100%                      | Microbiology Lab, Mount Sinai Hospital   NBCC Sequencing Facility   J Wrana.                                        |
| GH    | PL B.1           | EPI_ISL_802774 | Galicia (Spain)       | 2020-10      | 100%                      | Hospital Santa María Nai   Instituto de Salud Carlos III   M Iglesias-Caballero, M Molinero-Calamita <i>et al.</i>  |
| GH    | PL B.1.36        | EPI_ISL_859730 | Abu Dhabi (UAE)       | 2020-09      | 100%                      | BTC, Khalifa University   Al Safar <i>et al</i>                                                                     |
| GH    | PL B.1.351*      | EPI_ISL_700461 | George (South Africa) | 2020-11      | 95% gap<br>nt 29862-29869 | Thembaletu CDC wc THC   NHLS/UCT   Tegally H, Iranzadeh A <i>et al</i> .                                            |

|    |                          |                     |                                     |         |                               |                                                                                                                                                                                                                   |
|----|--------------------------|---------------------|-------------------------------------|---------|-------------------------------|-------------------------------------------------------------------------------------------------------------------------------------------------------------------------------------------------------------------|
| GH | PL B.1.351*              | EPI_ISL_860577      | Zululand<br>(South Africa)          | 2021-01 | 94% gap<br>nt 29862-<br>29869 | NHLS-IALCH<br>  KRISP, KZn Research<br>Innovation and Sequencing<br>Platform   Giandhari J,<br>Pillay S <i>et al.</i>                                                                                             |
| GH | PL B.1.351*              | EPI_ISL_736980      | Sarah<br>Baartman<br>(South Africa) | 2020-12 | 96% gap<br>nt 29864-<br>29870 | NHLS-IALCH<br>  KRISP, KZn Research<br>Innovation and Sequencing<br>Platform   Giandhari J,<br>Pillay S <i>et al.</i>                                                                                             |
| GH | B.1.427****              | EPI_ISL_824620      | California<br>(USA)                 | 2020-12 | 100%                          | Cedars-Sinai Medical Center,<br>Molecular Pathology<br>Laboratory of Department of<br>Pathology & Laboratory<br>Medicine and Genomic Core<br>  Zhng, Davis <i>et al</i>                                           |
| GH | B.1.429 +<br>B.1.427**** | EPI_ISL_960573      | Campania<br>(Italy)                 | 2021-01 | 91% gap<br>nt 29855-<br>29871 | Istituto Zooprofilattico<br>Sperimentale del<br>Mezzogiorno   TIGEM  <br>Grimaldi, Annunziata <i>et al</i>                                                                                                        |
| GH | B.1.427****              | EPI_ISL_879977      | Tijuana<br>(Mexico)                 | 2020-11 | 99%<br>nt 29756<br>G->A       | San Diego County Public<br>Health Laboratory<br>  Andersen lab at Scripps<br>Research<br>  SEARCH Alliance San<br>Diego with Tracy Basler,<br>Jovan Shephard, Brett<br>Austin                                     |
| GH | B.1.427****              | EPI_ISL_101661<br>0 | California<br>(USA)                 | 2021-02 | 97% gap<br>nt 29865-<br>29869 | Helix/Illumina   Respiratory<br>Viruses Branch, Centers for<br>Disease Control and<br>Prevention   Cook, Howard<br><i>et al</i>                                                                                   |
| GH | B.1.429****              | EPI_ISL_753563      | California<br>(USA)                 | 2020-12 | 100%                          | Clinical virology Laboratory,<br>Children's Hospital Los<br>Angeles   Center for<br>Personalized Medicine,<br>Children's Hospital Los<br>Angeles   Gai <i>et al</i>                                               |
| GH | B.1.429****              | EPI_ISL_955330      | Georgia<br>(USA)                    | 2021-01 | 100%                          | GA Department of Public<br>Health Laboratory  <br>Pathogen Discovery,<br>Respiratory Viruses Branch,<br>Division of Viral Diseases,<br>Centers for Disease Control<br>and Prevention   Tao, Zhang<br><i>et al</i> |
| GH | B.1.429****              | EPI_ISL_956329      | Taoyuan<br>(Taiwan)                 | 2021-01 | 100%                          | Laboratory Medicine  <br>Department of Laboratory<br>Medicine, Lin-Kou Chang<br>Gung Memorial Hospital  <br>Tsao, Gong <i>et al.</i>                                                                              |

|    |              |                |                           |         |                   |                                                                                                                                                                     |
|----|--------------|----------------|---------------------------|---------|-------------------|---------------------------------------------------------------------------------------------------------------------------------------------------------------------|
| G  | PL B.1.400   | EPI_ISL_753415 | Los Angeles (USA)         | 2020-11 | 100%              | Clinical virology Laboratory, Children's Hospital Los Angeles   Center for Personalized Medicine, Children's Hospital Los Angeles   Gai <i>et al</i>                |
| G  | PL B.1.237   | EPI_ISL_682338 | Free State (South Africa) | 2020-09 | 100%              | NHLS Universitas Academic   UFS Virology   PA Bester, MM Nyaga <i>et al.</i>                                                                                        |
| G  | PL B.1.5     | EPI_ISL_539541 | Catalunya (Spain)         | 2020-06 | 100%              | Hospital Clinic   Instituto de Salud Carlos III   M Iglesias-Caballero, M Molinero-Calamita <i>et al.</i>                                                           |
| G  | PL B.1.221   | EPI_ISL_831985 | Stockholm (Sweden)        | 2020-12 | 100%              | ABC   The Public Health Agency of Sweden   Department of Microbiology, The Public Health Agency of Sweden                                                           |
| G  | PL B.1.395   | EPI_ISL_859570 | Abu Dhabi (UAE)           | 2020-08 | 100%              | BTC, Khalifa University   Al Safar <i>et al</i>                                                                                                                     |
| GR | PL B.1.1.28  | EPI_ISL_848623 | Para (Brazil)             | 2020-04 | 100%              | Evandro Chagas Institute   MC Santos, AM Silva <i>et al.</i>                                                                                                        |
| GR | PL B.1.1.7** | EPI_ISL_857469 | Singapore                 | 2021-01 | 99% nt 29790 A->G | National Public Health Laboratory, National Centre for Infectious Diseases   TM Mak, S Octavia <i>et al</i>                                                         |
| GR | PL B.1.1.7** | EPI_ISL_763946 | England (UK)              | 2020-12 | 100%              | Oxford Viromics, NDM, Oxford University Hospitals   COVID-19 Genomics UK (COG-UK) Consortium   Golubchik T, Bonsall D <i>et al.</i>                                 |
| GR | PL B.1.1.7** | EPI_ISL_679641 | England (UK)              | 2020-11 | 99% nt 29850 A->G | Oxford Viromics, NDM, Oxford University Hospitals   COVID-19 Genomics UK (COG-UK) Consortium   Golubchik T, Bonsall D <i>et al.</i>                                 |
| GR | PL B.1.1.7** | EPI_ISL_763844 | England (UK)              | 2021-01 | 100%              | Oxford Viromics, NDM, Oxford University Hospitals   COVID-19 Genomics UK (COG-UK) Consortium   Golubchik T, Bonsall D <i>et al.</i>                                 |
| GR | PL B.1.1     | PI_ISL_412972  | Mexico (Mexico)           | 2020-02 | 100%              | Instituto Nacional de Enfermedades Respiratorias   Instituto de Diagnostico y Referencia Epidemiologicos (INDRE)   E Ramirez-Gonzalez, F Garces-Ayala <i>et al.</i> |

|    |              |                |                     |         |                                               |                                                                                                                                                                                                     |
|----|--------------|----------------|---------------------|---------|-----------------------------------------------|-----------------------------------------------------------------------------------------------------------------------------------------------------------------------------------------------------|
| GR | PL B.1.1237  | EPI_ISL_479093 | England (UK)        | 2020-05 | 100%                                          | Oxford Viromics, NDM, University of Oxford; Oxford University Hospitals; Basingstoke and North Hampshire Hospital   COVID-19 Genomics UK (COG-UK) Consortium   T Golubchik, D Bonsall <i>et al.</i> |
| GR | PL B.1.1.229 | EPI_ISL_653791 | Bari (Italy)        | 2020-11 | 100%                                          | I.R.C.C.S. "S. De Bellis" - Ente Ospedaliero   Istituto Zooprofilattico Sperimentale della Puglia e della Basilicata   A Parisi, A Bianco <i>et al.</i>                                             |
| GR | P.1.***      | EPI_ISL_906081 | Manaus (Brazil)     | 2021-01 | 99%<br>nt 29834<br>T->A<br>nt 29858<br>T->A/T | Hospital Beneficiencia Portuguesa   Instituto Adolfo Lutz   C Tavares, C Regina <i>et al.</i>                                                                                                       |
| GR | P.1.***      | EPI_ISL_875566 | Abruzzo (Italy)     | 2021-01 | 99.5%<br>nt 29834<br>T->A                     | SIESP L'AQUILA   Istituto Zooprofilattico Sperimentale dell'Abruzzo e Molise "G. Caporale"   A Lorusso, M Marcacci <i>et al.</i>                                                                    |
| GV | PL B.1.177   | EPI_ISL_733500 | Ben Arous (Tunisia) | 2020-07 | 100%                                          | Charles Nicolle Hospital, University of Tunis ElManar, National Observatory of New and Emerging Diseases   IBB Boubaker, S Trabelsi <i>et al.</i>                                                   |
| GV | PL B.1.189   | EPI_ISL_483514 | San Diego (USA)     | 2020-06 | 100%                                          | UC San Diego Center for Advanced Laboratory Medicine   Andersen lab at Scripps Research   SEARCH Alliance San Diego with David Pride, Ji H Shin                                                     |
| GV | P.1.177      | EPI_ISL_582841 | Orebro (Sweden)     | 2020-08 | 100%                                          | Orebro klinisk mikrobiologi   The Public Health Agency of Sweden   AM Linde, ML Karlberg <i>et al.</i>                                                                                              |
| GV | PL B.1       | EPI_ISL_641555 | Toulouse (France)   | 2020-05 | 100%                                          | CHU Toulouse   CNR Virus des Infections Respiratoires   A Bal, G Destras <i>et al.</i>                                                                                                              |
| GV | PL B.1.172   | EPI_ISL_842194 | England (UK)        | 2020-10 | 100%                                          | Oxford Viromics, NDM, University of Oxford; Oxford University Hospitals; Basingstoke and North Hampshire Hospital   COVID-19 Genomics UK (COG-UK) Consortium   T Golubchik, D Bonsall <i>et al.</i> |

|   |            |                |                         |         |                           |                                                                                                                                                                                                      |
|---|------------|----------------|-------------------------|---------|---------------------------|------------------------------------------------------------------------------------------------------------------------------------------------------------------------------------------------------|
| L | PL B       | EPI_ISL_434534 | Wuhan (China)           | 2019-12 | 100%                      | National Institute for Viral Disease Control and Prevention,   W Tan, R Lu <i>et al.</i>                                                                                                             |
| L | PL B       | EPI_ISL_812867 | Egypt                   | 2020-07 | 100%                      | Genomics Program, Children Cancer Hospital   A Hatem, A Hadad <i>et al.</i>                                                                                                                          |
| L | PL B.6     | EPI_ISL_475025 | Jerusalem (Israel)      | 2020-04 | 100%                      | Israel Central Virology laboratory   N Zuckerman, ED Bucris <i>et al.</i>                                                                                                                            |
| L | PL B.3     | EPI_ISL_416488 | Zielonogorskie (Poland) | 2020-03 | 100%                      | ViroGenetics - BSL3 Laboratory of Virology; Human Genome Variation Research Group & Genomics Centre MCB; Bioinformatics Research Group Department of Virology   A Milewska, E Pośpiech <i>et al.</i> |
| L | PL B       | EPI_ISL_447608 | Frankfurt (Germany)     | 2020-02 | 100%                      | Institute for Medical Virology, Goethe University Hospital Frankfurt   T Toptan, S Hoehl <i>et al.</i>                                                                                               |
| O | PL B       | EPI_ISL_406844 | Clayton (Australia)     | 2020-01 | 97% gap<br>nt 29749-29759 | Monash Medical Centre   University of Melbourne, the Victorian Infectious Disease Reference Laboratory   L Caly, T Seemann <i>et al.</i>                                                             |
| O | PL B       | EPI_ISL_406031 | Kaohsiung (Taiwan)      | 2020-01 | 100%                      | Centers for Disease Control, R.O.C.   JR Yang, YC Lin <i>et al.</i>                                                                                                                                  |
| O | PL B       | EPI_ISL_728153 | Aichi (Japan)           | 2020-03 | 100%                      | Fujita Health University School of Medicine   T Murata, Y Doi <i>et al.</i>                                                                                                                          |
| O | PL B.6.6   | EPI_ISL_508424 | Yavatmal (India)        | 2020-05 | 99%<br>nt 29868<br>G->A   | Mahatma Gandhi Institute of Medical Sciences   National Institute of Biomedical Genomics   A Maitra, V Deotale <i>et al.</i>                                                                         |
| O | PL B.1.1.1 | EPI_ISL_812837 | Egypt                   | 2020-07 | 100%                      | Genomics Program, Children Cancer Hospital   A Hatem, A Hadad <i>et al.</i>                                                                                                                          |
| S | PL A.6     | EPI_ISL_447908 | Bangkok (Thailand)      | 2020    | 100%                      | Siriraj hospital   National Institute of Health   O Pilailuk, H Navin <i>et al.</i>                                                                                                                  |
| S | PL A       | EPI_ISL_812957 | South Korea             | 2020-03 | 100%                      | Division of Pathogen Resource Management, Korea National Institute of Health, Korea Disease Control and Prevention Agency   ST Kim, SY Kim <i>et al.</i>                                             |

|   |         |                |                               |         |                         |                                                                                                                                                                         |
|---|---------|----------------|-------------------------------|---------|-------------------------|-------------------------------------------------------------------------------------------------------------------------------------------------------------------------|
|   |         |                |                               |         |                         | <i>al.</i>                                                                                                                                                              |
| S | PL A    | EPI_ISL_779264 | Karachi<br>(Pakistan)         | 2020-06 | 99%<br>nt 29742<br>G->A | Jamil-ur-Rahman Center for<br>Genome Research, Dr.<br>Panjwani Center for<br>Molecular Medicine and<br>Drug Research   ; Shakeel, M<br>Irfan <i>et al.</i>              |
| S | PL A.2  | EPI_ISL_454503 | Nur-Sultan<br>(Kazakhstan)    | 2020-04 | 100%                    | RSE "National Center for<br>Biotechnology"   A<br>Shevtsov, I Akhmetollayev <i>et al.</i>                                                                               |
| S | PL A    | EPI_ISL_859691 | Abu Dhabi<br>(UAE)            | 2020-09 | 99%<br>nt 29742<br>G->A | BTC, Khalifa University   Al<br>Safar <i>et al.</i>                                                                                                                     |
| V | PL B.28 | EPI_ISL_428897 | St.<br>Petersburg<br>(Russia) | 2020-03 | 100%                    | State Research Center of<br>Virology and Biotechnology<br>VECTOR   SA Bodnev, OV.<br>Pyankov <i>et al.</i>                                                              |
| V | PL B    | EPI_ISL_482335 | Oregon<br>(USA)               | 2020-04 | 100%                    | Providence St. Joseph Health<br>Molecular Genomics<br>Laboratory   AK Dowdell,<br>BD Piening <i>et al.</i>                                                              |
| V | PL B.40 | EPI_ISL_729947 | Lagos State<br>(Nigeria)      | 2020-05 | 100%                    | Nigeria Centre for Disease<br>Control   African Centre of<br>Excellence for Genomics of<br>Infectious Diseases,<br>Redeemer's University  <br>Oluniyi P.E. <i>et al</i> |
| V | PL B    | EPI_ISL_437303 | Styria<br>(Austria)           | 2020-04 | 100%                    | Diagnostic and Research<br>Institute of Pathology,<br>Medical University of Graz  <br>K Kashofer, P Regitnig <i>et al.</i>                                              |
| V | PL B    | EPI_ISL_457990 | Muscat<br>(Oman)              | 2020-03 | 100%                    | Oman-NIC   S Al-Maruyi, F<br>Zadjali <i>et al.</i>                                                                                                                      |
